# Supplementary material
Source: publisher figshare collection journal article supplement (https://gsajournals.figshare.com/ndownloader/files/25736792)
Supplement: Supplementary file 1 [file 25736792]

## Sheet: functional_annotation
SeqName	Length, aa	blastp hit in NR	% identity	bitscore	blastp hit in UniProt	% identity	bitscore	KEGG ontology	InterPro GO IDs	InterPro GO Names	InterPro IDs	Blast2GO description	Blast2GO IDs	Blast2GO Names
Cnem000002-RA	810	WP_144078600.1	34.0	260.0	A0A016TPF9	36.5	198.0	no hit	no GO terms	no GO terms	IPR043128 (G3DSA:3.30.70.GENE3D); G3DSA:3.10.10.10 (GENE3D); IPR000477 (PFAM); G3DSA:3.10.20.370 (GENE3D); IPR043128 (G3DSA:3.30.70.GENE3D); PTHR24559:SF269 (PANTHER); PTHR24559 (PANTHER); PTHR24559:SF269 (PANTHER); cd01647 (CDD); IPR043502 (SUPERFAMILY)	DDE-type integrase/transposase/recombinase	no GO terms	no GO terms
Cnem000004-RA	1191	PSN51319.1	45.9	473.4	A0A2P8Z488	45.9	473.4	no hit	F:GO:0003676; F:GO:0004523	F:nucleic acid binding; F:RNA-DNA hybrid ribonuclease activity	IPR036397 (G3DSA:3.30.420.GENE3D); G3DSA:3.10.10.10 (GENE3D); IPR000477 (PFAM); IPR002156 (PFAM); IPR043128 (G3DSA:3.30.70.GENE3D); mobidb-lite (MOBIDB_LITE); PTHR19446 (PANTHER); PTHR19446:SF425 (PANTHER); PTHR19446:SF425 (PANTHER); PTHR19446 (PANTHER); IPR000477 (PROSITE_PROFILES); IPR002156 (PROSITE_PROFILES); IPR000477 (PROSITE_PROFILES); cd01650 (CDD); cd01650 (CDD); IPR012337 (SUPERFAMILY);…	hypothetical protein C0J52_18786	no GO terms	no GO terms
Cnem000009-RA	360	RUS91759.1	32.8	164.1	A0A2T7PNE3	29.9	99.8	no hit	F:GO:0003676; F:GO:0004523	F:nucleic acid binding; F:RNA-DNA hybrid ribonuclease activity	IPR036397 (G3DSA:3.30.420.GENE3D); IPR002156 (PFAM); PTHR10642:SF0 (PANTHER); PTHR10642 (PANTHER); IPR002156 (PROSITE_PROFILES); cd09276 (CDD); IPR012337 (SUPERFAMILY)	hypothetical protein	no GO terms	no GO terms
Cnem000011-RA	284	XP_005090481.1;XP_012941344.1	81.7	254.6	A0A3S1BU06	73.2	233.8	K06678	P:GO:0007076; C:GO:0000796	P:mitotic chromosome condensation; C:condensin complex	IPR011989 (G3DSA:1.25.10.GENE3D); IPR027165 (PANTHER); IPR016024 (SUPERFAMILY)	condensin complex subunit 3-like	no GO terms	no GO terms
Cnem000015-RA	128	RUS91586.1	58.3	154.5	A0A3S1BU06	58.3	154.5	no hit	P:GO:0007076; C:GO:0000796	P:mitotic chromosome condensation; C:condensin complex	PTHR14418:SF5 (PANTHER); IPR027165 (PANTHER)	hypothetical protein EGW08_000701	P:GO:0007076; C:GO:0000796	P:mitotic chromosome condensation; C:condensin complex
Cnem000020-RA	436	RUS90919.1	42.0	237.7	A0A3S1A548	42.0	237.7	no hit	P:GO:0007076; C:GO:0000796	P:mitotic chromosome condensation; C:condensin complex	IPR025977 (PFAM); PTHR14418:SF5 (PANTHER); IPR027165 (PANTHER)	hypothetical protein EGW08_001316	no GO terms	no GO terms
Cnem000023-RA	500	XP_005110016.1	39.2	175.6	A0A3S1BU06	36.6	119.0	no hit	no GO terms	no GO terms	mobidb-lite (MOBIDB_LITE); mobidb-lite (MOBIDB_LITE); mobidb-lite (MOBIDB_LITE); mobidb-lite (MOBIDB_LITE)	PREDICTED: uncharacterized protein LOC101854755	no GO terms	no GO terms
Cnem000024-RA	683	RUS88711.1	43.0	450.3	A0A433U4I6	43.0	450.3	no hit	F:GO:0003676; F:GO:0004523	F:nucleic acid binding; F:RNA-DNA hybrid ribonuclease activity	IPR002156 (PFAM); IPR000477 (PFAM); IPR036397 (G3DSA:3.30.420.GENE3D); mobidb-lite (MOBIDB_LITE); PTHR19446 (PANTHER); IPR000477 (PROSITE_PROFILES); IPR002156 (PROSITE_PROFILES); cd01650 (CDD); IPR012337 (SUPERFAMILY); IPR043502 (SUPERFAMILY)	hypothetical protein EGW08_003526	P:GO:0090502; F:GO:0003676; F:GO:0004523	P:RNA phosphodiester bond hydrolysis, endonucleolytic; F:nucleic acid binding; F:RNA-DNA hybrid ribonuclease activity
Cnem000025-RA	633	XP_019622270.1	56.2	736.5	K7EXX0	56.2	744.6	no hit	no GO terms	no GO terms	IPR000477 (PFAM); PTHR19446:SF411 (PANTHER); PTHR19446 (PANTHER); IPR000477 (PROSITE_PROFILES); IPR013087 (PROSITE_PROFILES); cd01650 (CDD); IPR043502 (SUPERFAMILY)	PREDICTED: uncharacterized protein LOC109468467	no GO terms	no GO terms
Cnem000056-RA	673	RUS88711.1	39.4	318.2	A0A433U4I6	39.4	318.2	no hit	F:GO:0003676; F:GO:0004523	F:nucleic acid binding; F:RNA-DNA hybrid ribonuclease activity	IPR002156 (PFAM); IPR036397 (G3DSA:3.30.420.GENE3D); IPR036397 (G3DSA:3.30.420.GENE3D); IPR000477 (PFAM); PTHR10642 (PANTHER); IPR000477 (PROSITE_PROFILES); IPR002156 (PROSITE_PROFILES); IPR002156 (PROSITE_PROFILES); IPR002156 (PROSITE_PROFILES); cd09276 (CDD); cd09276 (CDD); IPR012337 (SUPERFAMILY); IPR043502 (SUPERFAMILY); IPR012337 (SUPERFAMILY)	hypothetical protein EGW08_012163	P:GO:0090502; F:GO:0003676; F:GO:0004523	P:RNA phosphodiester bond hydrolysis, endonucleolytic; F:nucleic acid binding; F:RNA-DNA hybrid ribonuclease activity
Cnem000057-RA	204	no hit	no hit	no hit	no hit	no hit	no hit	no hit	no GO terms	no GO terms	mobidb-lite (MOBIDB_LITE); mobidb-lite (MOBIDB_LITE)	---NA---	no GO terms	no GO terms
Cnem000066-RA	266	KXJ10292.1	45.2	127.1	A0A2J7PMA7	40.8	101.3	no hit	no GO terms	no GO terms	PTHR47027 (PANTHER); PTHR47027:SF6 (PANTHER)	hypothetical protein EGW08_002896	F:GO:0005524; C:GO:0016021	F:ATP binding; C:integral component of membrane
Cnem000068-RA	452	GCF48632.1	31.8	191.8	H2YWZ5	34.6	202.2	no hit	no IPS match	no IPS match	no IPS match	hypothetical protein parPi_0014784	no GO terms	no GO terms
Cnem000073-RA	163	XP_013066961.1	33.3	70.9	A0A2C9L1S6	33.3	70.9	no hit	no GO terms	no GO terms	IPR036249 (G3DSA:3.40.30.GENE3D); cd02961 (CDD); IPR036249 (SUPERFAMILY)	PREDICTED: uncharacterized protein LOC106055303	no GO terms	no GO terms
Cnem000083-RA	236	XP_013089015.1	85.1	313.5	A0A2C9JYJ6	85.1	313.5	K01530	P:GO:0015914; F:GO:0000287; F:GO:0005524; F:GO:0140326; C:GO:0016021	P:phospholipid transport; F:magnesium ion binding; F:ATP binding; F:ATPase-coupled intramembrane lipid transporter activity; C:integral component of membrane	IPR001757 (TIGRFAM); mobidb-lite (MOBIDB_LITE); IPR006539 (PANTHER); IPR030348 (PTHR24092:PANTHER); IPR036412 (SUPERFAMILY)	phospholipid-transporting ATPase ID-like	P:GO:0015914; P:GO:0034204; F:GO:0000287; F:GO:0005524; F:GO:0140326; C:GO:0016021	P:phospholipid transport; P:lipid translocation; F:magnesium ion binding; F:ATP binding; F:ATPase-coupled intramembrane lipid transporter activity; C:integral component of membrane
Cnem000084-RA	315	RUS88711.1	33.3	196.8	A0A433U4I6	33.3	196.8	no hit	no GO terms	no GO terms	IPR012337 (SUPERFAMILY)	hypothetical protein EGW08_003526	P:GO:0090502; F:GO:0003676; F:GO:0004523	P:RNA phosphodiester bond hydrolysis, endonucleolytic; F:nucleic acid binding; F:RNA-DNA hybrid ribonuclease activity
Cnem000087-RA	418	XP_032241703.1	63.8	453.4	K7EWA3	64.6	444.5	no hit	no GO terms	no GO terms	IPR000477 (PFAM); PTHR47027:SF5 (PANTHER); PTHR47027 (PANTHER); IPR000477 (PROSITE_PROFILES); IPR043502 (SUPERFAMILY)	RNA-directed DNA polymerase from mobile element jockey-like	no GO terms	no GO terms
Cnem000091-RA	533	RUS68506.1	42.4	360.9	A0A3S0Z3I7	42.4	360.9	no hit	no GO terms	no GO terms	IPR043128 (G3DSA:3.30.70.GENE3D); IPR000477 (PFAM); G3DSA:3.10.10.10 (GENE3D); PTHR19446:SF416 (PANTHER); PTHR19446 (PANTHER); IPR000477 (PROSITE_PROFILES); cd01650 (CDD); IPR043502 (SUPERFAMILY); IPR043502 (SUPERFAMILY)	endonuclease-reverse transcriptase	P:GO:0006278; P:GO:0090305; F:GO:0003964; F:GO:0004519	P:RNA-dependent DNA biosynthetic process; P:nucleic acid phosphodiester bond hydrolysis; F:RNA-directed DNA polymerase activity; F:endonuclease activity
Cnem000094-RA	897	RUS88711.1	40.7	422.5	A0A433U4I6	40.7	422.5	no hit	F:GO:0003676; F:GO:0004523	F:nucleic acid binding; F:RNA-DNA hybrid ribonuclease activity	IPR036397 (G3DSA:3.30.420.GENE3D); IPR002156 (PFAM); IPR000477 (PFAM); PTHR19446:SF425 (PANTHER); PTHR19446 (PANTHER); IPR000477 (PROSITE_PROFILES); IPR002156 (PROSITE_PROFILES); cd01650 (CDD); cd09276 (CDD); IPR043502 (SUPERFAMILY); IPR012337 (SUPERFAMILY)	hypothetical protein EGW08_003526	P:GO:0090502; F:GO:0003676; F:GO:0004523	P:RNA phosphodiester bond hydrolysis, endonucleolytic; F:nucleic acid binding; F:RNA-DNA hybrid ribonuclease activity
Cnem000095-RA	147	XP_005107404.1;XP_005107405.1;XP_012942954.1	71.5	209.1	A0A2C9JYI9	68.6	196.8	K01304	P:GO:0006508; F:GO:0008233; F:GO:0016920; C:GO:0005829	P:proteolysis; F:peptidase activity; F:pyroglutamyl-peptidase activity; C:cytosol	IPR036440 (G3DSA:3.40.630.GENE3D); IPR016125 (PFAM); IPR016125 (PANTHER); IPR029761 (PTHR23402:PANTHER); IPR036440 (SUPERFAMILY)	pyroglutamyl-peptidase 1-like	no GO terms	no GO terms
Cnem000103-RA	211	no hit	no hit	no hit	no hit	no hit	no hit	no hit	no IPS match	no IPS match	no IPS match	hypothetical protein EGW08_012163	P:GO:0090502; F:GO:0003676; F:GO:0004523	P:RNA phosphodiester bond hydrolysis, endonucleolytic; F:nucleic acid binding; F:RNA-DNA hybrid ribonuclease activity
Cnem000106-RA	543	RUS88711.1	46.4	445.3	A0A433U4I6	46.4	445.3	no hit	F:GO:0003676; F:GO:0004523	F:nucleic acid binding; F:RNA-DNA hybrid ribonuclease activity	IPR000477 (PFAM); IPR036397 (G3DSA:3.30.420.GENE3D); IPR002156 (PFAM); PTHR33332 (PANTHER); PTHR33332:SF18 (PANTHER); IPR000477 (PROSITE_PROFILES); IPR002156 (PROSITE_PROFILES); IPR012337 (SUPERFAMILY)	hypothetical protein EGW08_003526	P:GO:0090502; F:GO:0003676; F:GO:0004523	P:RNA phosphodiester bond hydrolysis, endonucleolytic; F:nucleic acid binding; F:RNA-DNA hybrid ribonuclease activity
Cnem000123-RA	747	PVD21563.1	37.6	354.0	A0A2T7NK70	37.6	354.0	no hit	no GO terms	no GO terms	IPR036514 (G3DSA:3.40.50.GENE3D); IPR036691 (G3DSA:3.60.10.GENE3D); IPR000477 (PFAM); PTHR19446 (PANTHER); PTHR19446:SF425 (PANTHER); IPR000477 (PROSITE_PROFILES); cd01650 (CDD); IPR036691 (SUPERFAMILY); IPR043502 (SUPERFAMILY); SSF52266 (SUPERFAMILY)	hypothetical protein C0Q70_17361	no GO terms	no GO terms
Cnem000133-RA	678	RUS88711.1	42.8	120.9	A0A433U4I6	42.8	120.9	no hit	no GO terms	no GO terms	IPR036691 (G3DSA:3.60.10.GENE3D); IPR005135 (PFAM); mobidb-lite (MOBIDB_LITE); IPR036691 (SUPERFAMILY)	hypothetical protein EGW08_016403	no GO terms	no GO terms
Cnem000138-RA	193	KXJ28630.1	35.9	113.2	A0A3S0ZV17	27.3	106.7	no hit	no GO terms	no GO terms	IPR000477 (PFAM); PTHR19446 (PANTHER); PTHR19446:SF427 (PANTHER); IPR000477 (PROSITE_PROFILES); IPR043502 (SUPERFAMILY)	putative uncharacterized transposon-derived protein F52C9.6	no GO terms	no GO terms
Cnem000145-RA	207	RUS88774.1	42.9	146.7	A0A3S1CCA7	42.9	146.7	no hit	F:GO:0003676; F:GO:0004523	F:nucleic acid binding; F:RNA-DNA hybrid ribonuclease activity	IPR036397 (G3DSA:3.30.420.GENE3D); IPR002156 (PFAM); IPR002156 (PROSITE_PROFILES); IPR012337 (SUPERFAMILY)	hypothetical protein EGW08_013652	P:GO:0090502; F:GO:0003676; F:GO:0004523	P:RNA phosphodiester bond hydrolysis, endonucleolytic; F:nucleic acid binding; F:RNA-DNA hybrid ribonuclease activity
Cnem000146-RA	131	XP_013089383.1	85.6	160.6	A0A2C9KBL8	85.6	160.6	no hit	no GO terms	no GO terms	IPR011993 (G3DSA:2.30.29.GENE3D); IPR001849 (PFAM); PTHR22902:SF34 (PANTHER); PTHR22902 (PANTHER); IPR001849 (PROSITE_PROFILES); SSF50729 (SUPERFAMILY)	ras-specific guanine nucleotide-releasing factor 2-like	P:GO:0035023; F:GO:0005085	P:regulation of Rho protein signal transduction; F:guanyl-nucleotide exchange factor activity
Cnem000149-RA	731	XP_009050716.1;ESO98605.1	44.8	168.7	V4AUJ0	44.8	168.7	no hit	no GO terms	no GO terms	IPR021109 (G3DSA:2.40.70.GENE3D); G3DSA:3.10.10.10 (GENE3D); PTHR24559:SF299 (PANTHER); PTHR24559 (PANTHER); cd00303 (CDD); IPR021109 (SUPERFAMILY); IPR043502 (SUPERFAMILY)	hypothetical protein LOTGIDRAFT_174140	F:GO:0003676; F:GO:0008270	F:nucleic acid binding; F:zinc ion binding
Cnem000156-RA	677	PVD21563.1	38.6	201.4	A0A2T7NK70	38.6	201.4	no hit	no GO terms	no GO terms	IPR036514 (G3DSA:3.40.50.GENE3D); mobidb-lite (MOBIDB_LITE); mobidb-lite (MOBIDB_LITE); mobidb-lite (MOBIDB_LITE); mobidb-lite (MOBIDB_LITE); mobidb-lite (MOBIDB_LITE); mobidb-lite (MOBIDB_LITE); mobidb-lite (MOBIDB_LITE); PTHR47510 (PANTHER); cd00229 (CDD); SSF52266 (SUPERFAMILY)	hypothetical protein C0Q70_17361	no GO terms	no GO terms
Cnem000160-RA	488	PFX25237.1	68.3	188.7	A0A2B4REM3	68.3	188.7	no hit	no GO terms	no GO terms	PTHR47027:SF5 (PANTHER); PTHR47027 (PANTHER)	RNA-directed DNA polymerase from mobile element jockey	no GO terms	no GO terms
Cnem000162-RA	782	RUS85319.1	43.8	392.5	A0A3S1BCT8	43.8	392.5	no hit	F:GO:0003676; F:GO:0004523	F:nucleic acid binding; F:RNA-DNA hybrid ribonuclease activity	IPR000477 (PFAM); IPR036691 (G3DSA:3.60.10.GENE3D); IPR036397 (G3DSA:3.30.420.GENE3D); IPR002156 (PFAM); mobidb-lite (MOBIDB_LITE); mobidb-lite (MOBIDB_LITE); PTHR19446 (PANTHER); PTHR19446:SF427 (PANTHER); IPR002156 (PROSITE_PROFILES); cd01650 (CDD); cd09276 (CDD); IPR012337 (SUPERFAMILY); IPR036691 (SUPERFAMILY)	hypothetical protein EGW08_006920	P:GO:0090502; F:GO:0003676; F:GO:0004523	P:RNA phosphodiester bond hydrolysis, endonucleolytic; F:nucleic acid binding; F:RNA-DNA hybrid ribonuclease activity
Cnem000164-RA	223	PZC81754.1	34.7	67.8	A0A2G8JQR5	44.1	66.6	no hit	no IPS match	no IPS match	no IPS match	PREDICTED: uncharacterized protein LOC109468467	no GO terms	no GO terms
Cnem000167-RA	274	XP_013089383.1	96.4	378.3	A0A2C9KBL8	96.4	378.3	K04349	P:GO:0007264; P:GO:0035023; P:GO:0046578; F:GO:0005085	P:small GTPase mediated signal transduction; P:regulation of Rho protein signal transduction; P:regulation of Ras protein signal transduction; F:guanyl-nucleotide exchange factor activity	IPR001895 (PFAM); IPR036964 (G3DSA:1.10.840.GENE3D); IPR008937 (PANTHER); IPR030745 (PTHR23113:PANTHER); IPR001895 (PROSITE_PROFILES); IPR001895 (CDD); IPR023578 (SUPERFAMILY)	ras-specific guanine nucleotide-releasing factor 2-like	P:GO:0035023; F:GO:0005085	P:regulation of Rho protein signal transduction; F:guanyl-nucleotide exchange factor activity
Cnem000170-RA	1284	WP_144078600.1	42.0	920.2	A0A3P8Q5A9	33.3	508.8	K07497	P:GO:0015074; F:GO:0003676	P:DNA integration; F:nucleic acid binding	IPR041588 (PFAM); IPR000477 (PFAM); IPR001584 (PFAM); G3DSA:3.10.10.10 (GENE3D); IPR041373 (PFAM); G3DSA:3.10.20.370 (GENE3D); IPR043128 (G3DSA:3.30.70.GENE3D); G3DSA:1.10.340.70 (GENE3D); IPR043128 (G3DSA:3.30.70.GENE3D); IPR036397 (G3DSA:3.30.420.GENE3D); mobidb-lite (MOBIDB_LITE); mobidb-lite (MOBIDB_LITE); mobidb-lite (MOBIDB_LITE); mobidb-lite (MOBIDB_LITE); mobidb-lite (MOBIDB_LITE); mobidb…	DDE-type integrase/transposase/recombinase	no GO terms	no GO terms
Cnem000178-RA	585	RUS77506.1	31.1	100.1	A0A3S1BCL0	31.1	100.1	no hit	F:GO:0003676; F:GO:0004523	F:nucleic acid binding; F:RNA-DNA hybrid ribonuclease activity	IPR002156 (PFAM); IPR036397 (G3DSA:3.30.420.GENE3D); IPR036397 (G3DSA:3.30.420.GENE3D); mobidb-lite (MOBIDB_LITE); PTHR23147:SF113 (PANTHER); PTHR23147 (PANTHER); IPR002156 (PROSITE_PROFILES); IPR002156 (PROSITE_PROFILES); IPR012337 (SUPERFAMILY); IPR012337 (SUPERFAMILY)	hypothetical protein EGW08_008040	P:GO:0090502; F:GO:0003676; F:GO:0004523	P:RNA phosphodiester bond hydrolysis, endonucleolytic; F:nucleic acid binding; F:RNA-DNA hybrid ribonuclease activity
Cnem000185-RA	501	no hit	no hit	no hit	no hit	no hit	no hit	no hit	no GO terms	no GO terms	G3DSA:3.40.50.12700 (GENE3D); mobidb-lite (MOBIDB_LITE); mobidb-lite (MOBIDB_LITE); SSF52266 (SUPERFAMILY)	---NA---	no GO terms	no GO terms
Cnem000191-RA	1166	RUS88711.1	42.0	491.5	A0A433U4I6	42.0	491.5	no hit	F:GO:0003676; F:GO:0004523	F:nucleic acid binding; F:RNA-DNA hybrid ribonuclease activity	IPR002156 (PFAM); IPR036397 (G3DSA:3.30.420.GENE3D); IPR036691 (G3DSA:3.60.10.GENE3D); IPR000477 (PFAM); PTHR19446:SF425 (PANTHER); PTHR19446 (PANTHER); PTHR19446:SF425 (PANTHER); IPR000477 (PROSITE_PROFILES); IPR002156 (PROSITE_PROFILES); cd09276 (CDD); cd01650 (CDD); IPR012337 (SUPERFAMILY)	putative RNA-directed DNA polymerase from transposon BS	P:GO:0006278; P:GO:0090502; F:GO:0003676; F:GO:0003964; F:GO:0004523	P:RNA-dependent DNA biosynthetic process; P:RNA phosphodiester bond hydrolysis, endonucleolytic; F:nucleic acid binding; F:RNA-directed DNA polymerase activity; F:RNA-DNA hybrid ribonuclease activity
Cnem000194-RA	508	RUS85482.1	38.5	219.5	A0A3S0ZTJ0	38.5	219.5	no hit	F:GO:0003676; F:GO:0004523	F:nucleic acid binding; F:RNA-DNA hybrid ribonuclease activity	IPR002156 (PFAM); IPR036397 (G3DSA:3.30.420.GENE3D); mobidb-lite (MOBIDB_LITE); mobidb-lite (MOBIDB_LITE); PTHR31780 (PANTHER); PTHR31780:SF1 (PANTHER); IPR002156 (PROSITE_PROFILES); cd09276 (CDD); IPR012337 (SUPERFAMILY)	---NA---	no GO terms	no GO terms
Cnem000196-RA	225	RUS87822.1	32.5	108.6	A0A433U1X1	32.5	108.6	no hit	F:GO:0003676; F:GO:0004523	F:nucleic acid binding; F:RNA-DNA hybrid ribonuclease activity	IPR036397 (G3DSA:3.30.420.GENE3D); IPR002156 (PROSITE_PROFILES); IPR012337 (SUPERFAMILY)	hypothetical protein EGW08_008040	P:GO:0090502; F:GO:0003676; F:GO:0004523	P:RNA phosphodiester bond hydrolysis, endonucleolytic; F:nucleic acid binding; F:RNA-DNA hybrid ribonuclease activity
Cnem000207-RA	774	GCF50888.1	32.5	458.0	A0A402F2Z0	32.5	458.0	no hit	no GO terms	no GO terms	IPR036691 (G3DSA:3.60.10.GENE3D); IPR005135 (PFAM); IPR000477 (PFAM); PTHR47027 (PANTHER); PTHR47027:SF6 (PANTHER); cd09076 (CDD); cd01650 (CDD); IPR036691 (SUPERFAMILY); IPR043502 (SUPERFAMILY)	hypothetical protein parPi_0012022	no GO terms	no GO terms
Cnem000208-RA	229	GCF48619.1	37.6	103.6	A0A402EUZ9	37.6	103.6	no hit	no GO terms	no GO terms	PTHR47027:SF6 (PANTHER); PTHR47027 (PANTHER)	hypothetical protein parPi_0012768	no GO terms	no GO terms
Cnem000215-RA	134	no hit	no hit	no hit	no hit	no hit	no hit	no hit	no GO terms	no GO terms	SignalP-noTM (SIGNALP_EUK)	---NA---	no GO terms	no GO terms
Cnem000218-RA	196	WP_078461487.1;OOY49051.1	47.0	163.3	A0A433UD90	41.1	146.0	no hit	no GO terms	no GO terms	IPR000477 (PFAM); IPR000477 (PROSITE_PROFILES)	hypothetical protein	no GO terms	no GO terms
Cnem000222-RA	456	RUS88711.1	35.9	299.3	A0A433U4I6	35.9	299.3	no hit	F:GO:0003676; F:GO:0004523	F:nucleic acid binding; F:RNA-DNA hybrid ribonuclease activity	IPR036397 (G3DSA:3.30.420.GENE3D); IPR000477 (PFAM); IPR002156 (PFAM); PTHR33332 (PANTHER); PTHR33332:SF6 (PANTHER); IPR000477 (PROSITE_PROFILES); IPR002156 (PROSITE_PROFILES); IPR012337 (SUPERFAMILY); IPR043502 (SUPERFAMILY)	hypothetical protein EGW08_003526	P:GO:0090502; F:GO:0003676; F:GO:0004523	P:RNA phosphodiester bond hydrolysis, endonucleolytic; F:nucleic acid binding; F:RNA-DNA hybrid ribonuclease activity
Cnem000225-RA	1461	XP_014677047.1	49.7	503.8	W4Y5A2	42.8	424.9	no hit	no GO terms	no GO terms	IPR000477 (PFAM); mobidb-lite (MOBIDB_LITE); mobidb-lite (MOBIDB_LITE); mobidb-lite (MOBIDB_LITE); mobidb-lite (MOBIDB_LITE); mobidb-lite (MOBIDB_LITE); mobidb-lite (MOBIDB_LITE); mobidb-lite (MOBIDB_LITE); mobidb-lite (MOBIDB_LITE); mobidb-lite (MOBIDB_LITE); mobidb-lite (MOBIDB_LITE); mobidb-lite (MOBIDB_LITE); mobidb-lite (MOBIDB_LITE); mobidb-lite (MOBIDB_LITE); mobidb-lite (MOBIDB_LITE); mob…	---NA---	no GO terms	no GO terms
Cnem000229-RA	163	XP_005105831.2	63.6	217.6	A0A0L8IEI5	50.3	172.6	K01137	P:GO:0030203; F:GO:0003824; F:GO:0008449; C:GO:0005764	P:glycosaminoglycan metabolic process; F:catalytic activity; F:N-acetylglucosamine-6-sulfatase activity; C:lysosome	IPR017850 (G3DSA:3.40.720.GENE3D); PTHR43108 (PANTHER); IPR015981 (PTHR43108:PANTHER); IPR017850 (SUPERFAMILY)	N-acetylglucosamine-6-sulfatase-like isoform X2	no GO terms	no GO terms
Cnem000231-RA	667	no hit	no hit	no hit	no hit	no hit	no hit	no hit	no GO terms	no GO terms	PTHR44826:SF7 (PANTHER); PTHR44826:SF7 (PANTHER); PTHR44826 (PANTHER); PTHR44826 (PANTHER); NON_CYTOPLASMIC_DOMAIN (PHOBIUS); TRANSMEMBRANE (PHOBIUS); CYTOPLASMIC_DOMAIN (PHOBIUS); CYTOPLASMIC_DOMAIN (PHOBIUS); NON_CYTOPLASMIC_DOMAIN (PHOBIUS); CYTOPLASMIC_DOMAIN (PHOBIUS); TRANSMEMBRANE (PHOBIUS); TRANSMEMBRANE (PHOBIUS); NON_CYTOPLASMIC_DOMAIN (PHOBIUS); TRANSMEMBRANE (PHOBIUS); TRANSMEMBRANE (…	Dynein heavy chain	C:GO:0016021	C:integral component of membrane
Cnem000234-RA	332	Q25413.1;CAA65635.1	31.7	70.1	no hit	no hit	no hit	no hit	no GO terms	no GO terms	mobidb-lite (MOBIDB_LITE); mobidb-lite (MOBIDB_LITE); mobidb-lite (MOBIDB_LITE); mobidb-lite (MOBIDB_LITE); mobidb-lite (MOBIDB_LITE); PTHR20986 (PANTHER)	RecName: Full=Myomodulin neuropeptides; Contains: RecName: Full=GLQMLRL-amide; Contains: RecName: Full=QIPMLRL-amide; Contains: RecName: Full=SMSMLRL-amide; Contains: RecName: Full=SLSMLRL-amide; Contains: RecName: Full=Myomodulin-A; AltName: Full=PMSMLRL-amide; Flags: Precursor	P:GO:0007218; C:GO:0005576	P:neuropeptide signaling pathway; C:extracellular region
Cnem000243-RA	364	XP_005097935.1	40.0	170.6	A0A087THU2	25.4	60.8	no hit	no GO terms	no GO terms	IPR000477 (PFAM); IPR000477 (PROSITE_PROFILES)	PREDICTED: uncharacterized protein LOC106013216	no GO terms	no GO terms
Cnem000245-RA	386	XP_013064911.1;XP_013064913.1	87.5	683.7	A0A2C9K704	87.5	683.7	K14399	P:GO:0031124; C:GO:0005849	P:mRNA 3'-end processing; C:mRNA cleavage factor complex	IPR038238 (G3DSA:3.30.70.GENE3D); IPR032319 (PFAM); IPR010655 (PFAM); IPR032324 (PFAM); IPR038239 (G3DSA:2.60.120.GENE3D); G3DSA:3.40.50.300 (GENE3D); PTHR12755:SF6 (PANTHER); PTHR12755 (PANTHER); IPR028606 (HAMAP); cd00009 (CDD); IPR027417 (SUPERFAMILY)	polyribonucleotide 5'-hydroxyl-kinase Clp1-like	P:GO:0031124; F:GO:0005524; C:GO:0005849	P:mRNA 3'-end processing; F:ATP binding; C:mRNA cleavage factor complex
Cnem000246-RA	715	XP_013070960.1	55.1	660.6	A0A2C9JKS0	55.1	660.6	no hit	no GO terms	no GO terms	IPR000313 (SMART); IPR000313 (PFAM); G3DSA:2.30.30.140 (GENE3D); mobidb-lite (MOBIDB_LITE); mobidb-lite (MOBIDB_LITE); mobidb-lite (MOBIDB_LITE); mobidb-lite (MOBIDB_LITE); mobidb-lite (MOBIDB_LITE); mobidb-lite (MOBIDB_LITE); mobidb-lite (MOBIDB_LITE); mobidb-lite (MOBIDB_LITE); mobidb-lite (MOBIDB_LITE); mobidb-lite (MOBIDB_LITE); PTHR23068 (PANTHER); PTHR23068:SF30 (PANTHER); IPR000313 (PROSIT…	PREDICTED: uncharacterized protein LOC106058131 isoform X1	no GO terms	no GO terms
Cnem000251-RA	259	no hit	no hit	no hit	no hit	no hit	no hit	no hit	F:GO:0003676; F:GO:0004523	F:nucleic acid binding; F:RNA-DNA hybrid ribonuclease activity	IPR036397 (G3DSA:3.30.420.GENE3D); IPR002156 (PROSITE_PROFILES); IPR012337 (SUPERFAMILY)	hypothetical protein EGW08_003526	P:GO:0090502; F:GO:0003676; F:GO:0004523	P:RNA phosphodiester bond hydrolysis, endonucleolytic; F:nucleic acid binding; F:RNA-DNA hybrid ribonuclease activity
Cnem000260-RA	100	no hit	no hit	no hit	no hit	no hit	no hit	no hit	no IPS match	no IPS match	no IPS match	hypothetical protein EGW08_001316	no GO terms	no GO terms
Cnem000262-RA	257	RUS88711.1	36.6	192.2	A0A433U4I6	36.6	192.2	no hit	no GO terms	no GO terms	IPR000477 (PROSITE_PROFILES)	hypothetical protein EGW08_012163	P:GO:0090502; F:GO:0003676; F:GO:0004523	P:RNA phosphodiester bond hydrolysis, endonucleolytic; F:nucleic acid binding; F:RNA-DNA hybrid ribonuclease activity
Cnem000273-RA	149	XP_005089629.2	76.3	131.0	A0A3S0Z4W7	72.4	129.0	no hit	no GO terms	no GO terms	IPR029245 (PFAM); IPR029245 (PANTHER); TRANSMEMBRANE (PHOBIUS); NON_CYTOPLASMIC_DOMAIN (PHOBIUS); CYTOPLASMIC_DOMAIN (PHOBIUS); TRANSMEMBRANE (PHOBIUS); CYTOPLASMIC_DOMAIN (PHOBIUS); TMhelix (TMHMM); TMhelix (TMHMM)	PREDICTED: uncharacterized protein C15orf61-like, partial	no GO terms	no GO terms
Cnem000281-RA	322	XP_005113519.1	30.7	143.3	A0A3S0ZPX3	31.0	126.3	no hit	no GO terms	no GO terms	IPR029526 (PFAM); mobidb-lite (MOBIDB_LITE); mobidb-lite (MOBIDB_LITE); mobidb-lite (MOBIDB_LITE); PTHR46599 (PANTHER)	piggyBac transposable element-derived protein 4-like	no GO terms	no GO terms
Cnem000282-RA	425	CAB3264536.1	48.9	342.0	A0A3P8TFH9	52.6	385.6	no hit	no GO terms	no GO terms	IPR000477 (PFAM); PTHR19446:SF427 (PANTHER); PTHR19446 (PANTHER); IPR000477 (PROSITE_PROFILES); cd01650 (CDD); IPR043502 (SUPERFAMILY)	hypothetical protein EGW08_016314	no GO terms	no GO terms
Cnem000283-RA	496	XP_012943779.1	39.0	201.1	A0A3Q3BE46	26.0	129.0	no hit	no GO terms	no GO terms	IPR000477 (PFAM); IPR036691 (G3DSA:3.60.10.GENE3D); G3DSA:3.10.10.10 (GENE3D); IPR043128 (G3DSA:3.30.70.GENE3D); PTHR19446 (PANTHER); PTHR19446:SF425 (PANTHER); IPR000477 (PROSITE_PROFILES); cd01650 (CDD); IPR036691 (SUPERFAMILY); IPR043502 (SUPERFAMILY)	PREDICTED: uncharacterized protein LOC106013216	no GO terms	no GO terms
Cnem000286-RA	1380	PFX14838.1	54.1	289.3	A0A2B4REM3	54.1	289.3	no hit	F:GO:0003676; F:GO:0004523	F:nucleic acid binding; F:RNA-DNA hybrid ribonuclease activity	IPR002156 (PFAM); IPR036691 (G3DSA:3.60.10.GENE3D); IPR036397 (G3DSA:3.30.420.GENE3D); IPR005135 (PFAM); IPR000477 (PFAM); PTHR47027:SF5 (PANTHER); PTHR47027 (PANTHER); PTHR47027 (PANTHER); NON_CYTOPLASMIC_DOMAIN (PHOBIUS); CYTOPLASMIC_DOMAIN (PHOBIUS); TRANSMEMBRANE (PHOBIUS); IPR000477 (PROSITE_PROFILES); IPR002156 (PROSITE_PROFILES); cd09276 (CDD); IPR043502 (SUPERFAMILY); IPR012337 (SUPERFAMI…	hypothetical protein EGW08_003526	P:GO:0090502; F:GO:0003676; F:GO:0004523	P:RNA phosphodiester bond hydrolysis, endonucleolytic; F:nucleic acid binding; F:RNA-DNA hybrid ribonuclease activity
Cnem000288-RA	416	XP_014677047.1	42.3	293.5	A0A3S0ZV17	36.2	284.3	no hit	no GO terms	no GO terms	IPR000477 (PFAM); PTHR19446:SF427 (PANTHER); PTHR19446 (PANTHER); IPR000477 (PROSITE_PROFILES); cd01650 (CDD); IPR043502 (SUPERFAMILY)	PREDICTED: uncharacterized protein LOC106816918	no GO terms	no GO terms
Cnem000292-RA	655	WP_151089697.1	30.6	323.6	A0A3B3H8A8	30.0	308.1	no hit	no GO terms	no GO terms	IPR036691 (G3DSA:3.60.10.GENE3D); IPR000477 (PFAM); PTHR19446 (PANTHER); PTHR19446:SF425 (PANTHER); IPR000477 (PROSITE_PROFILES); cd01650 (CDD); IPR043502 (SUPERFAMILY); IPR036691 (SUPERFAMILY)	hypothetical protein, partial	no GO terms	no GO terms
Cnem000293-RA	755	NNK27532.1	36.4	502.7	A0A0J7KZE8	35.8	416.8	no hit	no GO terms	no GO terms	IPR000477 (PFAM); PTHR19446 (PANTHER); PTHR19446:SF427 (PANTHER); PTHR19446 (PANTHER); PTHR19446:SF427 (PANTHER); IPR000477 (PROSITE_PROFILES); cd01650 (CDD); IPR043502 (SUPERFAMILY); IPR043502 (SUPERFAMILY)	hypothetical protein EGW08_012012	no GO terms	no GO terms
Cnem000297-RA	325	XP_012937187.1	52.2	206.5	A0A433U4I6	39.9	156.8	no hit	no GO terms	no GO terms	IPR000477 (PFAM); PTHR33332 (PANTHER); IPR000477 (PROSITE_PROFILES); cd01650 (CDD); IPR043502 (SUPERFAMILY)	PREDICTED: uncharacterized protein LOC106011589	no GO terms	no GO terms
Cnem000302-RA	633	WP_078461487.1;OOY49051.1	46.8	570.1	A0A3S1ASJ4	40.9	485.7	no hit	F:GO:0003676; F:GO:0004523	F:nucleic acid binding; F:RNA-DNA hybrid ribonuclease activity	IPR000477 (PFAM); IPR002156 (PFAM); IPR036397 (G3DSA:3.30.420.GENE3D); PTHR19446 (PANTHER); PTHR19446:SF427 (PANTHER); IPR002156 (PROSITE_PROFILES); IPR000477 (PROSITE_PROFILES); cd09276 (CDD); cd01650 (CDD); IPR043502 (SUPERFAMILY); IPR012337 (SUPERFAMILY)	hypothetical protein	no GO terms	no GO terms
Cnem000306-RA	1639	XP_025085055.1	49.1	1282.3	A0A3S1B9P2	44.5	1048.9	no hit	no GO terms	no GO terms	IPR013087 (SMART); PF13912 (PFAM); G3DSA:3.30.160.60 (GENE3D); mobidb-lite (MOBIDB_LITE); mobidb-lite (MOBIDB_LITE); mobidb-lite (MOBIDB_LITE); mobidb-lite (MOBIDB_LITE); mobidb-lite (MOBIDB_LITE); PTHR31511 (PANTHER); PTHR31511:SF12 (PANTHER); IPR013087 (PROSITE_PATTERNS); IPR013087 (PROSITE_PATTERNS); IPR013087 (PROSITE_PROFILES); IPR013087 (PROSITE_PROFILES); IPR036236 (SUPERFAMILY); IPR043502…	uncharacterized protein LOC112558684 isoform X1	no GO terms	no GO terms
Cnem000313-RA	740	XP_025085055.1	46.6	681.8	A0A3S1B9P2	44.6	639.0	no hit	no GO terms	no GO terms	PTHR31511:SF12 (PANTHER); PTHR31511 (PANTHER); IPR043502 (SUPERFAMILY)	uncharacterized protein LOC112558684 isoform X2	no GO terms	no GO terms
Cnem000317-RA	848	KAF0313595.1	32.2	397.5	A0A0G2KS01	26.9	247.3	no hit	no GO terms	no GO terms	IPR005135 (PFAM); IPR036691 (G3DSA:3.60.10.GENE3D); IPR000477 (PFAM); PTHR19446:SF425 (PANTHER); PTHR19446 (PANTHER); NON_CYTOPLASMIC_DOMAIN (PHOBIUS); TRANSMEMBRANE (PHOBIUS); CYTOPLASMIC_DOMAIN (PHOBIUS); IPR000477 (PROSITE_PROFILES); cd01650 (CDD); IPR036691 (SUPERFAMILY); IPR043502 (SUPERFAMILY)	RNA-directed DNA polymerase from mobile element jockey-like	no GO terms	no GO terms
Cnem000319-RA	269	PNF29886.1	40.6	150.6	A0A2J7QMT0	40.6	150.6	no hit	no GO terms	no GO terms	G3DSA:3.30.420.470 (GENE3D); IPR000477 (PFAM); PTHR46060 (PANTHER)	hypothetical protein B7P43_G09445	no GO terms	no GO terms
Cnem000330-RA	669	WP_151089697.1	33.6	382.9	A0A3B5QX16	32.6	370.5	no hit	no GO terms	no GO terms	IPR036691 (G3DSA:3.60.10.GENE3D); IPR000477 (PFAM); IPR005135 (PFAM); PTHR19446 (PANTHER); PTHR19446:SF425 (PANTHER); IPR000477 (PROSITE_PROFILES); cd09076 (CDD); cd01650 (CDD); IPR043502 (SUPERFAMILY); IPR036691 (SUPERFAMILY)	hypothetical protein, partial	no GO terms	no GO terms
Cnem000331-RA	736	RUS75316.1	35.4	344.0	A0A3S0ZU31	35.4	344.0	no hit	no GO terms	no GO terms	Coil (COILS); IPR000477 (PFAM); IPR036691 (G3DSA:3.60.10.GENE3D); PTHR47027 (PANTHER); PTHR47027 (PANTHER); PTHR47027:SF6 (PANTHER); IPR000477 (PROSITE_PROFILES); cd09076 (CDD); IPR036691 (SUPERFAMILY); IPR043502 (SUPERFAMILY); IPR043502 (SUPERFAMILY)	hypothetical protein EGW08_016905	no GO terms	no GO terms
Cnem000338-RA	581	XP_005096902.1	60.2	632.1	A0A3S1BS44	59.5	600.1	K07179	P:GO:0006468; F:GO:0004672; F:GO:0004674; F:GO:0005524	P:protein phosphorylation; F:protein kinase activity; F:protein serine/threonine kinase activity; F:ATP binding	IPR000687 (SMART); G3DSA:3.30.200.20 (GENE3D); G3DSA:1.10.510.10 (GENE3D); IPR015285 (PFAM); PF01163 (PFAM); IPR036388 (G3DSA:1.10.10.GENE3D); mobidb-lite (MOBIDB_LITE); mobidb-lite (MOBIDB_LITE); mobidb-lite (MOBIDB_LITE); mobidb-lite (MOBIDB_LITE); PTHR45852 (PANTHER); IPR018935 (PROSITE_PATTERNS); IPR030484 (CDD); IPR011009 (SUPERFAMILY); IPR036390 (SUPERFAMILY)	hypothetical protein EGW08_002233	P:GO:0006468; F:GO:0004674; F:GO:0005524	P:protein phosphorylation; F:protein serine/threonine kinase activity; F:ATP binding
Cnem000339-RA	257	PNF29886.1	44.2	158.7	A0A2J7QMT0	44.2	158.7	no hit	no GO terms	no GO terms	G3DSA:3.30.420.470 (GENE3D); mobidb-lite (MOBIDB_LITE); mobidb-lite (MOBIDB_LITE); PTHR46060 (PANTHER)	hypothetical protein B7P43_G09445	no GO terms	no GO terms
Cnem000359-RA	401	KAF0297117.1	34.2	248.4	A0A0G2KS01	27.3	151.8	no hit	no GO terms	no GO terms	IPR000477 (PFAM); PTHR33332:SF6 (PANTHER); PTHR33332 (PANTHER); NON_CYTOPLASMIC_DOMAIN (PHOBIUS); CYTOPLASMIC_DOMAIN (PHOBIUS); TRANSMEMBRANE (PHOBIUS); IPR000477 (PROSITE_PROFILES); IPR043502 (SUPERFAMILY)	hypothetical protein EGW08_003526	P:GO:0090502; F:GO:0003676; F:GO:0004523	P:RNA phosphodiester bond hydrolysis, endonucleolytic; F:nucleic acid binding; F:RNA-DNA hybrid ribonuclease activity
Cnem000370-RA	835	XP_012936885.1	49.6	711.8	A0A2C9JP99	49.9	708.4	no hit	no GO terms	no GO terms	IPR013087 (SMART); G3DSA:3.30.160.60 (GENE3D); G3DSA:3.30.160.60 (GENE3D); G3DSA:3.30.160.60 (GENE3D); G3DSA:3.30.160.60 (GENE3D); IPR013087 (PFAM); G3DSA:3.30.160.60 (GENE3D); PTHR24377:SF809 (PANTHER); PTHR24377:SF809 (PANTHER); PTHR24377 (PANTHER); PTHR24377 (PANTHER); IPR013087 (PROSITE_PATTERNS); IPR013087 (PROSITE_PATTERNS); IPR013087 (PROSITE_PATTERNS); IPR013087 (PROSITE_PATTERNS); IPR013…	zinc finger protein 616-like isoform X2	no GO terms	no GO terms
Cnem000372-RA	960	RUS88711.1	49.7	591.7	A0A433U4I6	49.7	591.7	no hit	F:GO:0003676; F:GO:0004523	F:nucleic acid binding; F:RNA-DNA hybrid ribonuclease activity	IPR002156 (PFAM); IPR036397 (G3DSA:3.30.420.GENE3D); IPR000477 (PFAM); PTHR19446:SF425 (PANTHER); PTHR19446 (PANTHER); IPR000477 (PROSITE_PROFILES); IPR002156 (PROSITE_PROFILES); cd09276 (CDD); cd01650 (CDD); IPR043502 (SUPERFAMILY); IPR012337 (SUPERFAMILY)	hypothetical protein EGW08_003526	P:GO:0090502; F:GO:0003676; F:GO:0004523	P:RNA phosphodiester bond hydrolysis, endonucleolytic; F:nucleic acid binding; F:RNA-DNA hybrid ribonuclease activity
Cnem000374-RA	1121	OOZ58401.1	43.2	825.9	W4XIZ7	30.9	435.3	no hit	P:GO:0015074; F:GO:0003676	P:DNA integration; F:nucleic acid binding	Coil (COILS); Coil (COILS); IPR000477 (PFAM); G3DSA:3.10.20.370 (GENE3D); IPR036397 (G3DSA:3.30.420.GENE3D); IPR001584 (PFAM); IPR041373 (PFAM); G3DSA:1.10.340.70 (GENE3D); IPR041588 (PFAM); IPR043128 (G3DSA:3.30.70.GENE3D); G3DSA:3.10.10.10 (GENE3D); mobidb-lite (MOBIDB_LITE); mobidb-lite (MOBIDB_LITE); mobidb-lite (MOBIDB_LITE); PTHR24559 (PANTHER); PTHR24559:SF275 (PANTHER); IPR001584 (PROSITE…	hypothetical protein BOW44_13110, partial	no GO terms	no GO terms
Cnem000378-RA	175	RUS70812.1	44.7	72.4	A0A433SNT6	44.7	72.4	no hit	no GO terms	no GO terms	TRANSMEMBRANE (PHOBIUS); NON_CYTOPLASMIC_DOMAIN (PHOBIUS); CYTOPLASMIC_DOMAIN (PHOBIUS); IPR000477 (PROSITE_PROFILES); TMhelix (TMHMM)	hypothetical protein CAPTEDRAFT_217768	no GO terms	no GO terms
Cnem000381-RA	777	XP_005101395.2	42.2	248.1	A0A2C9JHQ6	41.3	245.4	no hit	no GO terms	no GO terms	IPR014752 (G3DSA:2.60.40.GENE3D); IPR014752 (G3DSA:2.60.40.GENE3D); IPR012969 (PFAM); IPR011021 (PFAM); IPR000477 (PFAM); PF02389 (PFAM); mobidb-lite (MOBIDB_LITE); PTHR11188:SF144 (PANTHER); PTHR11188 (PANTHER); PTHR11188:SF144 (PANTHER); PTHR11188 (PANTHER); IPR043502 (SUPERFAMILY); IPR014756 (SUPERFAMILY); IPR014756 (SUPERFAMILY)	putative uncharacterized transposon-derived protein F52C9.6	no GO terms	no GO terms
Cnem000389-RA	265	KXJ10292.1	42.3	82.0	A0A3S1A2L0	46.8	79.3	no hit	no GO terms	no GO terms	PTHR47027:SF6 (PANTHER); PTHR47027 (PANTHER); IPR012337 (SUPERFAMILY)	hypothetical protein EGW08_002896	F:GO:0005524; C:GO:0016021	F:ATP binding; C:integral component of membrane
Cnem000391-RA	180	RUS90339.1	71.1	270.4	A0A3S1BSL1	71.1	270.4	K04402	P:GO:0051726; C:GO:0005634	P:regulation of cell cycle; C:nucleus	IPR029064 (G3DSA:3.30.1330.GENE3D); IPR024824 (PANTHER)	hypothetical protein EGW08_001937	P:GO:0051726; C:GO:0005634	P:regulation of cell cycle; C:nucleus
Cnem000395-RA	636	XP_025109609.1	42.4	451.4	A0A2T7NQA8	42.4	451.4	K16487	no GO terms	no GO terms	Coil (COILS); Coil (COILS); Coil (COILS); Coil (COILS); Coil (COILS); IPR038558 (G3DSA:2.170.210.GENE3D); IPR032396 (PFAM); mobidb-lite (MOBIDB_LITE); mobidb-lite (MOBIDB_LITE); PTHR44281 (PANTHER)	hypothetical protein EGW08_020301	no GO terms	no GO terms
Cnem000405-RA	489	RUS85319.1	35.8	240.7	A0A2C9L3B8	81.0	141.4	no hit	P:GO:0055085; F:GO:0003676; F:GO:0004523; F:GO:0022857	P:transmembrane transport; F:nucleic acid binding; F:RNA-DNA hybrid ribonuclease activity; F:transmembrane transporter activity	IPR036397 (G3DSA:3.30.420.GENE3D); IPR011701 (PFAM); G3DSA:1.20.1250.20 (GENE3D); IPR002156 (PFAM); PTHR11662:SF279 (PANTHER); PTHR11662 (PANTHER); TRANSMEMBRANE (PHOBIUS); NON_CYTOPLASMIC_DOMAIN (PHOBIUS); CYTOPLASMIC_DOMAIN (PHOBIUS); NON_CYTOPLASMIC_DOMAIN (PHOBIUS); TRANSMEMBRANE (PHOBIUS); CYTOPLASMIC_DOMAIN (PHOBIUS); TRANSMEMBRANE (PHOBIUS); IPR002156 (PROSITE_PROFILES); cd09276 (CDD); cd1…	uncharacterized protein LOC111106094	no GO terms	no GO terms
Cnem000407-RA	277	no hit	no hit	no hit	A0A067QQ57	42.9	59.7	no hit	no GO terms	no GO terms	mobidb-lite (MOBIDB_LITE); mobidb-lite (MOBIDB_LITE)	hypothetical protein C0J52_01023	no GO terms	no GO terms
Cnem000412-RA	629	XP_019622270.1	44.0	511.5	A0A2B4RCM2	40.0	502.7	no hit	F:GO:0005515	F:protein binding	Coil (COILS); IPR002110 (SMART); PF13637 (PFAM); IPR036691 (G3DSA:3.60.10.GENE3D); IPR036770 (G3DSA:1.25.40.GENE3D); IPR000477 (PFAM); PTHR19446:SF411 (PANTHER); PTHR19446 (PANTHER); TRANSMEMBRANE (PHOBIUS); NON_CYTOPLASMIC_DOMAIN (PHOBIUS); CYTOPLASMIC_DOMAIN (PHOBIUS); IPR002110 (PROSITE_PROFILES); IPR020683 (PROSITE_PROFILES); IPR020683 (PROSITE_PROFILES); IPR000477 (PROSITE_PROFILES); IPR0021…	hypothetical protein BSL78_25845	no GO terms	no GO terms
Cnem000418-RA	267	RUS78045.1	39.1	152.9	A0A3S1B929	39.1	152.9	no hit	no GO terms	no GO terms	mobidb-lite (MOBIDB_LITE)	hypothetical protein EGW08_014184	P:GO:0006811; P:GO:0034220; P:GO:0055085; F:GO:0005216; C:GO:0016020; C:GO:0016021	P:ion transport; P:ion transmembrane transport; P:transmembrane transport; F:ion channel activity; C:membrane; C:integral component of membrane
Cnem000426-RA	568	XP_005105399.1	86.5	835.1	A0A433SUE4	82.8	787.7	K17921	F:GO:0035091	F:phosphatidylinositol binding	Coil (COILS); IPR001683 (SMART); IPR036871 (G3DSA:3.30.1520.GENE3D); IPR027267 (G3DSA:1.20.1270.GENE3D); IPR015404 (PFAM); IPR001683 (PFAM); PTHR45949 (PANTHER); IPR001683 (PROSITE_PROFILES); cd06860 (CDD); IPR027267 (SUPERFAMILY); IPR036871 (SUPERFAMILY)	sorting nexin-30-like	no GO terms	no GO terms
Cnem000429-RA	562	XP_012942649.1	39.3	147.9	J9L403	22.9	76.6	no hit	F:GO:0003676; F:GO:0004523	F:nucleic acid binding; F:RNA-DNA hybrid ribonuclease activity	IPR002156 (PFAM); IPR036397 (G3DSA:3.30.420.GENE3D); PTHR33332 (PANTHER); IPR002156 (PROSITE_PROFILES); IPR012337 (SUPERFAMILY)	hypothetical protein EGW08_003526	P:GO:0090502; F:GO:0003676; F:GO:0004523	P:RNA phosphodiester bond hydrolysis, endonucleolytic; F:nucleic acid binding; F:RNA-DNA hybrid ribonuclease activity
Cnem000439-RA	552	XP_005091357.1	53.6	315.8	A0A2C9LMC3	38.4	295.4	no hit	no GO terms	no GO terms	IPR029526 (PFAM); mobidb-lite (MOBIDB_LITE); mobidb-lite (MOBIDB_LITE); PTHR46599 (PANTHER)	piggyBac transposable element-derived protein 4-like	no GO terms	no GO terms
Cnem000441-RA	571	KAF0314667.1	30.1	269.2	A0A433U4I6	36.7	323.9	no hit	F:GO:0003676; F:GO:0004523	F:nucleic acid binding; F:RNA-DNA hybrid ribonuclease activity	IPR000477 (PFAM); PTHR19446 (PANTHER); PTHR19446:SF427 (PANTHER); IPR000477 (PROSITE_PROFILES); IPR002156 (PROSITE_PROFILES); IPR012337 (SUPERFAMILY)	putative RNA-directed DNA polymerase from transposon BS	P:GO:0006278; P:GO:0090502; F:GO:0003676; F:GO:0003964; F:GO:0004523	P:RNA-dependent DNA biosynthetic process; P:RNA phosphodiester bond hydrolysis, endonucleolytic; F:nucleic acid binding; F:RNA-directed DNA polymerase activity; F:RNA-DNA hybrid ribonuclease activity
Cnem000442-RA	78	no hit	no hit	no hit	no hit	no hit	no hit	no hit	no GO terms	no GO terms	mobidb-lite (MOBIDB_LITE); mobidb-lite (MOBIDB_LITE)	---NA---	no GO terms	no GO terms
Cnem000444-RA	389	RUS89376.1	57.0	178.7	A0A3S1CD12	57.0	178.7	no hit	no GO terms	no GO terms	IPR001888 (PFAM); G3DSA:3.30.420.470 (GENE3D); PTHR47027 (PANTHER); PTHR47027:SF6 (PANTHER)	hypothetical protein EGW08_002896	F:GO:0005524; C:GO:0016021	F:ATP binding; C:integral component of membrane
Cnem000448-RA	1465	XP_033750824.1	41.1	991.9	A0A1S3H977	40.0	983.0	no hit	P:GO:0006355; P:GO:0015074; F:GO:0003676; F:GO:0003700	P:regulation of transcription, DNA-templated; P:DNA integration; F:nucleic acid binding; F:DNA-binding transcription factor activity	Coil (COILS); Coil (COILS); IPR041577 (PFAM); IPR000477 (PFAM); IPR001584 (PFAM); G3DSA:3.10.10.10 (GENE3D); IPR043128 (G3DSA:3.30.70.GENE3D); G3DSA:1.10.340.70 (GENE3D); IPR003309 (PFAM); G3DSA:3.10.20.370 (GENE3D); IPR036397 (G3DSA:3.30.420.GENE3D); IPR041588 (PFAM); IPR043128 (G3DSA:3.30.70.GENE3D); mobidb-lite (MOBIDB_LITE); mobidb-lite (MOBIDB_LITE); mobidb-lite (MOBIDB_LITE); mobidb-lite (M…	uncharacterized protein LOC117335032	no GO terms	no GO terms
Cnem000450-RA	699	WP_078461487.1;OOY49051.1	47.7	624.4	A0A3S1ASJ4	41.1	529.6	no hit	F:GO:0003676; F:GO:0004523	F:nucleic acid binding; F:RNA-DNA hybrid ribonuclease activity	IPR002156 (PFAM); IPR036397 (G3DSA:3.30.420.GENE3D); IPR000477 (PFAM); PTHR33332 (PANTHER); PTHR33332:SF21 (PANTHER); IPR002156 (PROSITE_PROFILES); IPR000477 (PROSITE_PROFILES); cd01650 (CDD); cd09276 (CDD); IPR012337 (SUPERFAMILY)	hypothetical protein	no GO terms	no GO terms
Cnem000454-RA	259	XP_012940675.1	41.6	81.3	A0A2H2J3G4	28.9	58.9	no hit	no GO terms	no GO terms	IPR000477 (PFAM); mobidb-lite (MOBIDB_LITE); CYTOPLASMIC_DOMAIN (PHOBIUS); NON_CYTOPLASMIC_DOMAIN (PHOBIUS); CYTOPLASMIC_DOMAIN (PHOBIUS); TRANSMEMBRANE (PHOBIUS); TRANSMEMBRANE (PHOBIUS); IPR000477 (PROSITE_PROFILES)	RNA-directed DNA polymerase from mobile element jockey-like	no GO terms	no GO terms
Cnem000457-RA	438	RUS80216.1	36.4	265.0	A0A3P8TFH9	43.8	274.6	no hit	no GO terms	no GO terms	IPR000477 (PFAM); PTHR19446 (PANTHER); PTHR19446:SF427 (PANTHER); IPR043502 (SUPERFAMILY)	hypothetical protein EGW08_012012	no GO terms	no GO terms
Cnem000461-RA	268	RUS80216.1	42.9	214.9	A0A3S1C192	42.9	214.9	no hit	no GO terms	no GO terms	PTHR19446:SF427 (PANTHER); PTHR19446 (PANTHER); IPR000477 (PROSITE_PROFILES); IPR043502 (SUPERFAMILY)	hypothetical protein EGW08_012012	no GO terms	no GO terms
Cnem000481-RA	264	ADI61815.1	42.2	109.0	A0A402F0Z3	42.0	104.4	no hit	no GO terms	no GO terms	G3DSA:3.40.50.300 (GENE3D); PTHR47027:SF6 (PANTHER); PTHR47027 (PANTHER)	hypothetical protein parPi_0025026	no GO terms	no GO terms
Cnem000483-RA	208	XP_014677047.1	45.6	209.1	A0A3P8TFH9	47.5	214.9	no hit	no GO terms	no GO terms	IPR000477 (PFAM); PTHR19446 (PANTHER); PTHR19446:SF427 (PANTHER); PTHR19446 (PANTHER); IPR043502 (SUPERFAMILY)	PREDICTED: uncharacterized protein LOC106816918	no GO terms	no GO terms
Cnem000485-RA	237	XP_023233558.1	87.8	147.1	A0A0L7QRS3	85.4	142.9	no hit	no GO terms	no GO terms	IPR026630 (PANTHER)	general transcription factor II-I repeat domain-containing protein 2B-like	no GO terms	no GO terms
Cnem000486-RA	596	NNK27532.1	38.2	385.6	A0A3P8TFH9	46.3	333.6	no hit	no GO terms	no GO terms	IPR000477 (PFAM); PTHR19446 (PANTHER); PTHR19446:SF427 (PANTHER); IPR000477 (PROSITE_PROFILES); cd01650 (CDD); IPR043502 (SUPERFAMILY)	RNA-directed DNA polymerase	no GO terms	no GO terms
Cnem000487-RA	175	no hit	no hit	no hit	no hit	no hit	no hit	no hit	no IPS match	no IPS match	no IPS match	---NA---	no GO terms	no GO terms
Cnem000491-RA	194	PNF29350.1	60.3	72.8	A0A2J7QL93	60.3	72.8	no hit	no IPS match	no IPS match	no IPS match	hypothetical protein B7P43_G07837	no GO terms	no GO terms
Cnem000493-RA	1677	OOZ58401.1	43.3	776.2	A0A158P4P7	30.8	422.2	no hit	P:GO:0015074; F:GO:0003676	P:DNA integration; F:nucleic acid binding	G3DSA:3.10.20.370 (GENE3D); G3DSA:3.10.10.10 (GENE3D); IPR001584 (PFAM); IPR043128 (G3DSA:3.30.70.GENE3D); IPR036397 (G3DSA:3.30.420.GENE3D); IPR000477 (PFAM); IPR043128 (G3DSA:3.30.70.GENE3D); IPR041373 (PFAM); IPR041588 (PFAM); IPR036397 (G3DSA:3.30.420.GENE3D); G3DSA:1.10.340.70 (GENE3D); mobidb-lite (MOBIDB_LITE); mobidb-lite (MOBIDB_LITE); mobidb-lite (MOBIDB_LITE); mobidb-lite (MOBIDB_LITE)…	hypothetical protein BOW44_13110, partial	no GO terms	no GO terms
Cnem000519-RA	1351	WP_144078600.1	42.7	922.5	W4XIZ7	30.0	513.5	no hit	P:GO:0006508; P:GO:0015074; F:GO:0003676; F:GO:0004190	P:proteolysis; P:DNA integration; F:nucleic acid binding; F:aspartic-type endopeptidase activity	PF13975 (PFAM); IPR041373 (PFAM); IPR001584 (PFAM); IPR021109 (G3DSA:2.40.70.GENE3D); IPR041588 (PFAM); IPR043128 (G3DSA:3.30.70.GENE3D); G3DSA:1.10.340.70 (GENE3D); IPR036397 (G3DSA:3.30.420.GENE3D); G3DSA:3.10.20.370 (GENE3D); IPR000477 (PFAM); G3DSA:3.10.10.10 (GENE3D); IPR043128 (G3DSA:3.30.70.GENE3D); PTHR24559:SF269 (PANTHER); PTHR24559 (PANTHER); IPR001584 (PROSITE_PROFILES); IPR000477 (PR…	DDE-type integrase/transposase/recombinase	no GO terms	no GO terms
Cnem000520-RA	204	XP_013064049.1	89.2	384.8	A0A2C9K6D6	89.2	384.8	K02877	P:GO:0006412; F:GO:0003735; C:GO:0005840	P:translation; F:structural constituent of ribosome; C:ribosome	IPR000439 (PFAM); IPR024794 (G3DSA:3.40.1120.GENE3D); PTHR11847:SF23 (PANTHER); IPR000439 (PANTHER); IPR012678 (SUPERFAMILY)	60S ribosomal protein L15-like	P:GO:0006412; F:GO:0003735; C:GO:0005840	P:translation; F:structural constituent of ribosome; C:ribosome
Cnem000524-RA	1123	XP_013090850.1	65.1	1509.2	A0A2C9JZV8	65.1	1509.2	K03002	P:GO:0006351; F:GO:0003677; F:GO:0003899; F:GO:0032549; C:GO:0005634	P:transcription, DNA-templated; F:DNA binding; F:DNA-directed 5'-3' RNA polymerase activity; F:ribonucleoside binding; C:nucleus	IPR014724 (G3DSA:2.40.50.GENE3D); IPR007642 (PFAM); IPR037033 (G3DSA:2.40.270.GENE3D); IPR009674 (PFAM); IPR007644 (PFAM); IPR037034 (G3DSA:3.90.1110.GENE3D); G3DSA:3.90.1070.20 (GENE3D); IPR007120 (PFAM); IPR007645 (PFAM); IPR015712 (PANTHER); PTHR20856:SF5 (PANTHER); IPR015712 (CDD); SSF64484 (SUPERFAMILY)	DNA-directed RNA polymerase I subunit RPA2-like	P:GO:0006351; F:GO:0003677; F:GO:0003899; F:GO:0032549; C:GO:0005634	P:transcription, DNA-templated; F:DNA binding; F:DNA-directed 5'-3' RNA polymerase activity; F:ribonucleoside binding; C:nucleus
Cnem000526-RA	337	XP_015438116.1	29.7	77.4	A0A3B1IE94	28.2	79.0	no hit	no GO terms	no GO terms	IPR000477 (PFAM); mobidb-lite (MOBIDB_LITE); PTHR33332 (PANTHER); PTHR33332:SF6 (PANTHER); IPR000477 (PROSITE_PROFILES)	hypothetical protein BOV88_13545	P:GO:0090502; F:GO:0003676; F:GO:0004523	P:RNA phosphodiester bond hydrolysis, endonucleolytic; F:nucleic acid binding; F:RNA-DNA hybrid ribonuclease activity
Cnem000530-RA	1064	XP_013090856.1	47.1	892.1	A0A2C9JZW9	47.1	892.1	K08860	P:GO:0006468; F:GO:0004672; F:GO:0005515; F:GO:0005524	P:protein phosphorylation; F:protein kinase activity; F:protein binding; F:ATP binding	G3DSA:1.10.510.10 (GENE3D); G3DSA:3.30.200.20 (GENE3D); IPR015943 (G3DSA:2.130.10.GENE3D); IPR000719 (PFAM); PTHR11042 (PANTHER); IPR000719 (PROSITE_PROFILES); IPR011009 (SUPERFAMILY); IPR011047 (SUPERFAMILY)	eukaryotic translation initiation factor 2-alpha kinase 3-like isoform X1	P:GO:0006468; F:GO:0004672; F:GO:0005524	P:protein phosphorylation; F:protein kinase activity; F:ATP binding
Cnem000531-RA	331	RUS88711.1	52.3	115.9	A0A433U4I6	52.3	115.9	no hit	F:GO:0003676; F:GO:0004523	F:nucleic acid binding; F:RNA-DNA hybrid ribonuclease activity	IPR000477 (PFAM); IPR002156 (PFAM); IPR036397 (G3DSA:3.30.420.GENE3D); IPR000477 (PROSITE_PROFILES); IPR002156 (PROSITE_PROFILES); IPR043502 (SUPERFAMILY); IPR012337 (SUPERFAMILY)	PREDICTED: uncharacterized protein LOC106011589	no GO terms	no GO terms
Cnem000533-RA	106	XP_013090860.1	63.0	134.0	A0A2C9LFT1	63.0	134.0	no hit	F:GO:0005515	F:protein binding	IPR011042 (G3DSA:2.120.10.GENE3D); IPR001258 (PFAM); PTHR24104 (PANTHER); IPR013017 (PROSITE_PROFILES); PS51257 (PROSITE_PROFILES); SSF101898 (SUPERFAMILY)	PREDICTED: uncharacterized protein LOC106074604	no GO terms	no GO terms
Cnem000536-RA	883	XP_012941012.1	74.4	1312.7	A0A3S1BDT9	71.8	1281.5	K01228	P:GO:0009311; F:GO:0003824; F:GO:0004573	P:oligosaccharide metabolic process; F:catalytic activity; F:mannosyl-oligosaccharide glucosidase activity	IPR038518 (G3DSA:2.70.98.GENE3D); IPR031631 (PFAM); IPR031335 (PFAM); mobidb-lite (MOBIDB_LITE); IPR004888 (PANTHER); PTHR10412:SF11 (PANTHER); IPR008928 (SUPERFAMILY)	mannosyl-oligosaccharide glucosidase-like	no GO terms	no GO terms
Cnem000548-RA	193	GCF44897.1	30.2	76.6	A0A402EL35	30.2	76.6	no hit	no GO terms	no GO terms	mobidb-lite (MOBIDB_LITE); mobidb-lite (MOBIDB_LITE)	hypothetical protein parPi_0004286	no GO terms	no GO terms
Cnem000550-RA	639	WP_078461487.1;OOY49051.1	48.3	634.4	A0A3S1ASJ4	41.8	529.3	no hit	F:GO:0003676; F:GO:0004523	F:nucleic acid binding; F:RNA-DNA hybrid ribonuclease activity	IPR000477 (PFAM); IPR002156 (PFAM); IPR036397 (G3DSA:3.30.420.GENE3D); PTHR33332:SF6 (PANTHER); PTHR33332 (PANTHER); IPR000477 (PROSITE_PROFILES); IPR002156 (PROSITE_PROFILES); cd09276 (CDD); cd01650 (CDD); IPR012337 (SUPERFAMILY); IPR043502 (SUPERFAMILY)	hypothetical protein	no GO terms	no GO terms
Cnem000556-RA	724	WP_092487680.1	31.7	326.2	A0A3Q1IA94	31.6	315.8	no hit	no GO terms	no GO terms	IPR036691 (G3DSA:3.60.10.GENE3D); IPR000477 (PFAM); PTHR19446:SF427 (PANTHER); PTHR19446 (PANTHER); IPR000477 (PROSITE_PROFILES); cd01650 (CDD); cd09076 (CDD); IPR036691 (SUPERFAMILY)	R2DM Retrovirus-related Pol polyprotein from type II retrotransposable element	no GO terms	no GO terms
Cnem000559-RA	574	XP_012937187.1	34.4	192.6	A0A3B5QAR3	24.9	129.4	no hit	no GO terms	no GO terms	IPR036691 (G3DSA:3.60.10.GENE3D); IPR000477 (PFAM); PTHR19446 (PANTHER); PTHR19446:SF425 (PANTHER); IPR000477 (PROSITE_PROFILES); IPR043502 (SUPERFAMILY)	PREDICTED: uncharacterized protein LOC106013216	no GO terms	no GO terms
Cnem000567-RA	215	RUS74813.1	78.0	361.7	A0A433SZS1	78.0	361.7	K01557	F:GO:0003824	F:catalytic activity	IPR036663 (G3DSA:3.90.850.GENE3D); IPR011234 (PFAM); PTHR11820 (PANTHER); IPR036663 (SUPERFAMILY)	hypothetical protein EGW08_017422	F:GO:0003824	F:catalytic activity
Cnem000568-RA	444	XP_013096529.1	94.1	839.7	A0A2C9JCM3	94.1	839.7	K03265	P:GO:0006415; F:GO:0003747	P:translational termination; F:translation release factor activity	IPR024049 (G3DSA:3.30.960.GENE3D); IPR004403 (TIGRFAM); IPR005141 (PFAM); IPR005140 (PFAM); IPR042226 (G3DSA:3.30.420.GENE3D); IPR029064 (G3DSA:3.30.1330.GENE3D); IPR005142 (PFAM); IPR004403 (PANTHER); SSF53137 (SUPERFAMILY); IPR024049 (SUPERFAMILY); IPR029064 (SUPERFAMILY)	eukaryotic peptide chain release factor subunit 1	P:GO:0006415; F:GO:0003747	P:translational termination; F:translation release factor activity
Cnem000570-RA	348	XP_012942533.1	50.8	329.3	A0A2C9KT47	48.7	275.4	K19716	F:GO:0005515	F:protein binding	G3DSA:1.10.8.10 (GENE3D); PTHR15486 (PANTHER); PTHR15486:SF0 (PANTHER); IPR003892 (PROSITE_PROFILES); cd14420 (CDD); SSF69593 (SUPERFAMILY)	ancient ubiquitous protein 1-like	no GO terms	no GO terms
Cnem000574-RA	237	XP_013076441.1	87.0	401.0	A0A2C9JPP7	87.0	401.0	K23500	P:GO:0006811; P:GO:0055085; F:GO:0015075; C:GO:0016020	P:ion transport; P:transmembrane transport; F:ion transmembrane transporter activity; C:membrane	IPR004686 (TIGRFAM); IPR004686 (PFAM); PTHR11153:SF8 (PANTHER); IPR004686 (PANTHER)	PREDICTED: sideroflexin-1-like	no GO terms	no GO terms
Cnem000576-RA	290	XP_022296330.1	41.9	214.9	A0A433TJU2	38.4	196.1	no hit	F:GO:0003676; F:GO:0004523	F:nucleic acid binding; F:RNA-DNA hybrid ribonuclease activity	IPR036397 (G3DSA:3.30.420.GENE3D); PTHR10642 (PANTHER); IPR002156 (PROSITE_PROFILES); cd09276 (CDD); IPR012337 (SUPERFAMILY)	uncharacterized protein LOC111106094	no GO terms	no GO terms
Cnem000583-RA	135	XP_013073309.1	85.9	256.1	A0A2C9JMF8	85.9	256.1	K06709	no GO terms	no GO terms	IPR003349 (PFAM); G3DSA:2.60.120.650 (GENE3D); PTHR10694 (PANTHER); PTHR10694:SF30 (PANTHER); IPR003349 (PROSITE_PROFILES)	PREDICTED: LOW QUALITY PROTEIN: uncharacterized protein LOC106060082	F:GO:0046872; C:GO:0005634	F:metal ion binding; C:nucleus
Cnem000584-RA	2117	XP_005110551.1;XP_005110552.1;XP_012944675.1	67.2	555.8	A0A2C9JMF8	64.4	549.7	K06709	no GO terms	no GO terms	IPR013083 (G3DSA:3.30.40.GENE3D); PF13831 (PFAM); G3DSA:2.30.30.140 (GENE3D); PF02389 (PFAM); G3DSA:3.10.330.70 (GENE3D); IPR040477 (PFAM); IPR013083 (G3DSA:3.30.40.GENE3D); PF13832 (PFAM); mobidb-lite (MOBIDB_LITE); mobidb-lite (MOBIDB_LITE); mobidb-lite (MOBIDB_LITE); mobidb-lite (MOBIDB_LITE); mobidb-lite (MOBIDB_LITE); mobidb-lite (MOBIDB_LITE); mobidb-lite (MOBIDB_LITE); mobidb-lite (MOBIDB_…	PREDICTED: uncharacterized protein LOC101863626 isoform X6	no GO terms	no GO terms
Cnem000585-RA	1271	XP_013070443.1	51.8	468.8	A0A2C9JKC1	54.5	451.1	K17585	F:GO:0003676; F:GO:0004523	F:nucleic acid binding; F:RNA-DNA hybrid ribonuclease activity	IPR002156 (PFAM); IPR036397 (G3DSA:3.30.420.GENE3D); IPR004018 (PFAM); IPR000477 (PFAM); mobidb-lite (MOBIDB_LITE); mobidb-lite (MOBIDB_LITE); mobidb-lite (MOBIDB_LITE); mobidb-lite (MOBIDB_LITE); mobidb-lite (MOBIDB_LITE); mobidb-lite (MOBIDB_LITE); PTHR12751 (PANTHER); IPR004018 (PROSITE_PROFILES); IPR004018 (PROSITE_PROFILES); IPR004018 (PROSITE_PROFILES); IPR004018 (PROSITE_PROFILES); IPR0021…	phosphatase and actin regulator 1-like isoform X3	no GO terms	no GO terms
Cnem000587-RA	252	XP_013070434.1	44.7	172.9	A0A2C9KU10	44.7	172.9	no hit	no GO terms	no GO terms	G3DSA:3.30.160.60 (GENE3D); G3DSA:3.30.160.60 (GENE3D); IPR013087 (PFAM); G3DSA:3.30.160.60 (GENE3D); PTHR46179 (PANTHER); IPR013087 (PROSITE_PROFILES); IPR013087 (PROSITE_PROFILES); IPR013087 (PROSITE_PROFILES); IPR036236 (SUPERFAMILY); IPR036236 (SUPERFAMILY)	transcription factor IIIA-like	no GO terms	no GO terms
Cnem000589-RA	236	XP_005101671.1	69.4	355.1	A0A3S0ZRN1	67.2	339.7	K03681	F:GO:0003723; C:GO:0000178	F:RNA binding; C:exosome (RNase complex)	IPR004088 (PFAM); G3DSA:2.40.50.100 (GENE3D); IPR036612 (G3DSA:3.30.1370.GENE3D); G3DSA:2.40.50.140 (GENE3D); PTHR21321:SF1 (PANTHER); IPR026699 (PANTHER); IPR037319 (CDD); IPR012340 (SUPERFAMILY); SSF110324 (SUPERFAMILY); IPR036612 (SUPERFAMILY)	exosome complex component RRP40-like	no GO terms	no GO terms
Cnem000590-RA	251	XP_013071431.1;XP_013071432.1;XP_013071433.1	68.7	272.7	A0A2C9M4M3	68.7	272.7	K15129	P:GO:0006357; F:GO:0003712; C:GO:0016592	P:regulation of transcription by RNA polymerase II; F:transcription coregulator activity; C:mediator complex	IPR019364 (PFAM); mobidb-lite (MOBIDB_LITE); mobidb-lite (MOBIDB_LITE); mobidb-lite (MOBIDB_LITE); IPR019364 (PANTHER)	mediator of RNA polymerase II transcription subunit 8-like	P:GO:0006357; F:GO:0003712; C:GO:0016592	P:regulation of transcription by RNA polymerase II; F:transcription coregulator activity; C:mediator complex
Cnem000592-RA	69	no hit	no hit	no hit	no hit	no hit	no hit	no hit	no IPS match	no IPS match	no IPS match	---NA---	no GO terms	no GO terms
Cnem000593-RA	124	no hit	no hit	no hit	no hit	no hit	no hit	no hit	no GO terms	no GO terms	mobidb-lite (MOBIDB_LITE); mobidb-lite (MOBIDB_LITE); mobidb-lite (MOBIDB_LITE); mobidb-lite (MOBIDB_LITE)	unnamed protein product	no GO terms	no GO terms
Cnem000601-RA	143	RUS89574.1	77.6	245.7	A0A3S1BR66	77.6	245.7	K04261	P:GO:0007186; F:GO:0004960; C:GO:0016021	P:G protein-coupled receptor signaling pathway; F:thromboxane receptor activity; C:integral component of membrane	IPR001105 (PRINTS); IPR008365 (PRINTS); IPR017452 (PFAM); G3DSA:1.20.1070.10 (GENE3D); IPR008365 (PANTHER); IPR017452 (PROSITE_PROFILES); cd14981 (CDD); SSF81321 (SUPERFAMILY)	hypothetical protein EGW08_002692	P:GO:0007186; F:GO:0004930; C:GO:0016021	P:G protein-coupled receptor signaling pathway; F:G protein-coupled receptor activity; C:integral component of membrane
Cnem000605-RA	217	RUS88711.1	39.2	153.7	A0A3S0ZQ40	39.2	153.7	no hit	F:GO:0003676; F:GO:0004523	F:nucleic acid binding; F:RNA-DNA hybrid ribonuclease activity	IPR036397 (G3DSA:3.30.420.GENE3D); IPR002156 (PROSITE_PROFILES); IPR012337 (SUPERFAMILY)	hypothetical protein EGW08_008040	P:GO:0090502; F:GO:0003676; F:GO:0004523	P:RNA phosphodiester bond hydrolysis, endonucleolytic; F:nucleic acid binding; F:RNA-DNA hybrid ribonuclease activity
Cnem000609-RA	1376	XP_025085055.1	51.6	1357.0	A0A3S1B9P2	48.0	1116.7	no hit	no GO terms	no GO terms	G3DSA:3.30.160.60 (GENE3D); mobidb-lite (MOBIDB_LITE); mobidb-lite (MOBIDB_LITE); mobidb-lite (MOBIDB_LITE); PTHR31511 (PANTHER); PTHR31511:SF12 (PANTHER); IPR013087 (PROSITE_PROFILES); IPR036236 (SUPERFAMILY); IPR043502 (SUPERFAMILY)	uncharacterized protein LOC112558684 isoform X1	no GO terms	no GO terms
Cnem000615-RA	426	XP_025085060.1	55.3	471.1	A0A2G8L4X1	45.2	366.7	no hit	P:GO:0009263	P:deoxyribonucleotide biosynthetic process	IPR000358 (PANTHER); PTHR23409:SF21 (PANTHER)	uncharacterized protein F54H12.2-like	no GO terms	no GO terms
Cnem000617-RA	200	no hit	no hit	no hit	no hit	no hit	no hit	no hit	no IPS match	no IPS match	no IPS match	---NA---	no GO terms	no GO terms
Cnem000618-RA	170	no hit	no hit	no hit	no hit	no hit	no hit	no hit	no IPS match	no IPS match	no IPS match	---NA---	no GO terms	no GO terms
Cnem000633-RA	575	GBM71719.1	25.1	74.7	A0A2J7PU96	27.0	69.3	no hit	F:GO:0003676	F:nucleic acid binding	IPR036397 (G3DSA:3.30.420.GENE3D); PTHR33332:SF6 (PANTHER); PTHR33332 (PANTHER); TRANSMEMBRANE (PHOBIUS); CYTOPLASMIC_DOMAIN (PHOBIUS); NON_CYTOPLASMIC_DOMAIN (PHOBIUS); IPR012337 (SUPERFAMILY)	hypothetical protein EGW08_012163	P:GO:0090502; F:GO:0003676; F:GO:0004523	P:RNA phosphodiester bond hydrolysis, endonucleolytic; F:nucleic acid binding; F:RNA-DNA hybrid ribonuclease activity
Cnem000640-RA	470	XP_005097935.1	41.8	226.5	A0A433U4I6	42.9	208.8	no hit	no GO terms	no GO terms	IPR000477 (PFAM); PTHR33332 (PANTHER); PTHR33332:SF6 (PANTHER); TRANSMEMBRANE (PHOBIUS); CYTOPLASMIC_DOMAIN (PHOBIUS); NON_CYTOPLASMIC_DOMAIN (PHOBIUS); IPR000477 (PROSITE_PROFILES); cd01650 (CDD); IPR043502 (SUPERFAMILY)	putative RNA-directed DNA polymerase from transposon BS	P:GO:0006278; P:GO:0090502; F:GO:0003676; F:GO:0003964; F:GO:0004523	P:RNA-dependent DNA biosynthetic process; P:RNA phosphodiester bond hydrolysis, endonucleolytic; F:nucleic acid binding; F:RNA-directed DNA polymerase activity; F:RNA-DNA hybrid ribonuclease activity
Cnem000643-RA	536	XP_012946242.1	44.0	145.2	A0A2C9KC71	35.3	134.8	no hit	F:GO:0003676; F:GO:0004523	F:nucleic acid binding; F:RNA-DNA hybrid ribonuclease activity	IPR036397 (G3DSA:3.30.420.GENE3D); G3DSA:1.20.58.60 (GENE3D); PTHR47535:SF1 (PANTHER); PTHR47535 (PANTHER); IPR002156 (PROSITE_PROFILES); IPR012337 (SUPERFAMILY); SSF46966 (SUPERFAMILY); SSF46966 (SUPERFAMILY)	RNA-directed DNA polymerase from mobile element jockey-like	no GO terms	no GO terms
Cnem000647-RA	620	XP_005113519.1	41.9	487.6	A0A3S0ZPX3	44.5	430.3	no hit	no GO terms	no GO terms	IPR029526 (PFAM); mobidb-lite (MOBIDB_LITE); PTHR46599 (PANTHER)	piggyBac transposable element-derived protein 4-like	no GO terms	no GO terms
Cnem000650-RA	137	XP_021347345.1	59.6	146.7	A0A210QXB7	59.6	146.7	no hit	no GO terms	no GO terms	PTHR47535:SF1 (PANTHER); PTHR47535 (PANTHER); SIGNAL_PEPTIDE (PHOBIUS); SIGNAL_PEPTIDE_C_REGION (PHOBIUS); NON_CYTOPLASMIC_DOMAIN (PHOBIUS); SIGNAL_PEPTIDE_H_REGION (PHOBIUS); SIGNAL_PEPTIDE_N_REGION (PHOBIUS); SignalP-noTM (SIGNALP_EUK); SSF46966 (SUPERFAMILY)	Nesprin-1	F:GO:0003779; C:GO:0016021	F:actin binding; C:integral component of membrane
Cnem000657-RA	305	RUS81755.1	65.9	186.8	A0A3S0ZLI6	65.9	186.8	no hit	no GO terms	no GO terms	PTHR47027:SF6 (PANTHER); PTHR47027 (PANTHER); SSF46966 (SUPERFAMILY)	hypothetical protein EGW08_010509, partial	no GO terms	no GO terms
Cnem000660-RA	163	RUS81755.1	57.1	193.7	A0A3S0ZLI6	57.1	193.7	no hit	no GO terms	no GO terms	Coil (COILS); PTHR47535 (PANTHER); PTHR47535:SF1 (PANTHER); SSF46966 (SUPERFAMILY)	hypothetical protein EGW08_010509, partial	no GO terms	no GO terms
Cnem000662-RA	339	XP_013085169.1	59.1	384.0	A0A2C9KCB0	59.1	384.0	no hit	F:GO:0005515	F:protein binding	Coil (COILS); Coil (COILS); G3DSA:1.20.58.60 (GENE3D); IPR002017 (PFAM); PTHR47535:SF1 (PANTHER); PTHR47535 (PANTHER); SSF46966 (SUPERFAMILY); SSF46966 (SUPERFAMILY); SSF46966 (SUPERFAMILY)	PREDICTED: nesprin-1-like	F:GO:0003779	F:actin binding
Cnem000665-RA	220	RUS81755.1	70.6	252.7	A0A3S0ZLI6	70.6	252.7	no hit	F:GO:0005515	F:protein binding	Coil (COILS); IPR018159 (SMART); IPR002017 (PFAM); G3DSA:1.20.58.60 (GENE3D); PTHR47535 (PANTHER); SSF46966 (SUPERFAMILY); SSF46966 (SUPERFAMILY)	hypothetical protein EGW08_010509, partial	no GO terms	no GO terms
Cnem000669-RA	715	XP_014677047.1	36.4	315.5	H2YWZ5	30.0	221.1	no hit	no GO terms	no GO terms	Coil (COILS); IPR000477 (PFAM); PTHR47027:SF6 (PANTHER); PTHR47027 (PANTHER); IPR043502 (SUPERFAMILY); SSF46966 (SUPERFAMILY); IPR043502 (SUPERFAMILY)	putative uncharacterized transposon-derived protein F52C9.6	no GO terms	no GO terms
Cnem000673-RA	239	XP_012935202.1	44.9	172.6	A0A2C9KCB0	42.8	165.6	no hit	no IPS match	no IPS match	no IPS match	PREDICTED: nesprin-1-like	no GO terms	no GO terms
Cnem000675-RA	208	RUS81754.1	53.9	213.8	A0A433TJL8	53.9	213.8	no hit	P:GO:0007010; F:GO:0051015; C:GO:0005635; C:GO:0034993	P:cytoskeleton organization; F:actin filament binding; C:nuclear envelope; C:meiotic nuclear membrane microtubule tethering complex	G3DSA:1.20.58.60 (GENE3D); IPR030265 (PTHR14514:PANTHER); PTHR14514 (PANTHER); SSF46966 (SUPERFAMILY)	hypothetical protein EGW08_010508, partial	no GO terms	no GO terms
Cnem000676-RA	1011	RUS88711.1	35.8	331.3	A0A433U4I6	35.8	331.3	no hit	F:GO:0003676; F:GO:0004523	F:nucleic acid binding; F:RNA-DNA hybrid ribonuclease activity	IPR036397 (G3DSA:3.30.420.GENE3D); IPR000477 (PFAM); IPR002156 (PFAM); PTHR33332 (PANTHER); IPR000477 (PROSITE_PROFILES); IPR002156 (PROSITE_PROFILES); cd09276 (CDD); IPR043502 (SUPERFAMILY); IPR012337 (SUPERFAMILY)	hypothetical protein EGW08_003526	P:GO:0090502; F:GO:0003676; F:GO:0004523	P:RNA phosphodiester bond hydrolysis, endonucleolytic; F:nucleic acid binding; F:RNA-DNA hybrid ribonuclease activity
Cnem000679-RA	130	XP_012935202.1	58.0	143.7	A0A2C9KCB0	59.7	139.8	no hit	no GO terms	no GO terms	Coil (COILS)	PREDICTED: nesprin-1-like	no GO terms	no GO terms
Cnem000686-RA	746	XP_012935202.1	62.1	639.8	A0A433TJJ9	59.4	605.5	K19326	F:GO:0003676; F:GO:0004523	F:nucleic acid binding; F:RNA-DNA hybrid ribonuclease activity	Coil (COILS); IPR036397 (G3DSA:3.30.420.GENE3D); G3DSA:1.20.58.1940 (GENE3D); IPR002156 (PFAM); PTHR47535 (PANTHER); PTHR47535:SF1 (PANTHER); IPR002156 (PROSITE_PROFILES); cd09276 (CDD); IPR012337 (SUPERFAMILY); SSF46966 (SUPERFAMILY); SSF46966 (SUPERFAMILY)	PREDICTED: nesprin-1-like	no GO terms	no GO terms
Cnem000696-RA	1105	KXJ07406.1	28.4	243.8	A0A3Q2ZQ74	24.6	268.9	no hit	F:GO:0003676; F:GO:0004523	F:nucleic acid binding; F:RNA-DNA hybrid ribonuclease activity	IPR000477 (PFAM); IPR036397 (G3DSA:3.30.420.GENE3D); IPR036691 (G3DSA:3.60.10.GENE3D); IPR005135 (PFAM); IPR002156 (PFAM); PTHR19446 (PANTHER); PTHR19446:SF425 (PANTHER); TRANSMEMBRANE (PHOBIUS); CYTOPLASMIC_DOMAIN (PHOBIUS); NON_CYTOPLASMIC_DOMAIN (PHOBIUS); IPR000477 (PROSITE_PROFILES); IPR002156 (PROSITE_PROFILES); cd01650 (CDD); IPR012337 (SUPERFAMILY); IPR036691 (SUPERFAMILY); IPR043502 (SUP…	hypothetical protein EGW08_003526	P:GO:0090502; F:GO:0003676; F:GO:0004523	P:RNA phosphodiester bond hydrolysis, endonucleolytic; F:nucleic acid binding; F:RNA-DNA hybrid ribonuclease activity
Cnem000701-RA	452	KAF0313595.1	34.6	208.8	A0A433U4I6	52.3	152.9	no hit	no GO terms	no GO terms	IPR000477 (PFAM); PTHR19446:SF425 (PANTHER); PTHR19446 (PANTHER); IPR000477 (PROSITE_PROFILES); IPR043502 (SUPERFAMILY); IPR012337 (SUPERFAMILY)	PREDICTED: uncharacterized protein LOC106013216	no GO terms	no GO terms
Cnem000704-RA	180	GCF47493.1	33.3	99.4	A0A3Q1MDY8	32.1	98.6	no hit	no GO terms	no GO terms	Coil (COILS); PTHR47027:SF6 (PANTHER); PTHR47027 (PANTHER)	endonuclease-reverse transcriptase	P:GO:0006278; P:GO:0090305; F:GO:0003964; F:GO:0004519	P:RNA-dependent DNA biosynthetic process; P:nucleic acid phosphodiester bond hydrolysis; F:RNA-directed DNA polymerase activity; F:endonuclease activity
Cnem000706-RA	213	KAE9521792.1	48.3	83.6	A0A3P8SR08	43.3	85.5	no hit	no GO terms	no GO terms	PTHR47027:SF6 (PANTHER); PTHR47027 (PANTHER); CYTOPLASMIC_DOMAIN (PHOBIUS); TRANSMEMBRANE (PHOBIUS); TRANSMEMBRANE (PHOBIUS); NON_CYTOPLASMIC_DOMAIN (PHOBIUS); CYTOPLASMIC_DOMAIN (PHOBIUS)	hypothetical protein BSL78_03829	no GO terms	no GO terms
Cnem000709-RA	162	KDR10706.1	54.2	65.1	A0A067QQ57	54.2	65.1	no hit	no GO terms	no GO terms	TRANSMEMBRANE (PHOBIUS); CYTOPLASMIC_DOMAIN (PHOBIUS); NON_CYTOPLASMIC_DOMAIN (PHOBIUS)	hypothetical protein L798_15468	no GO terms	no GO terms
Cnem000726-RA	1144	WP_144078600.1	43.7	849.0	A0A087SUZ9	30.6	491.9	no hit	P:GO:0015074; F:GO:0003676	P:DNA integration; F:nucleic acid binding	IPR043128 (G3DSA:3.30.70.GENE3D); IPR001584 (PFAM); G3DSA:3.10.10.10 (GENE3D); G3DSA:1.10.340.70 (GENE3D); IPR036397 (G3DSA:3.30.420.GENE3D); IPR041373 (PFAM); G3DSA:3.10.20.370 (GENE3D); IPR043128 (G3DSA:3.30.70.GENE3D); PF13975 (PFAM); IPR000477 (PFAM); IPR021109 (G3DSA:2.40.70.GENE3D); IPR041588 (PFAM); mobidb-lite (MOBIDB_LITE); PTHR24559 (PANTHER); PTHR24559 (PANTHER); PTHR24559:SF269 (PANTH…	DDE-type integrase/transposase/recombinase	no GO terms	no GO terms
Cnem000735-RA	270	CAB3264536.1	45.7	164.1	A0A3P8RY40	48.3	174.1	no hit	no GO terms	no GO terms	IPR000477 (PFAM); PTHR19446:SF427 (PANTHER); PTHR19446 (PANTHER); IPR000477 (PROSITE_PROFILES); IPR043502 (SUPERFAMILY)	pol-like protein	no GO terms	no GO terms
Cnem000736-RA	446	RUS91759.1	35.8	244.6	A0A433UD90	35.8	244.6	no hit	F:GO:0003676; F:GO:0004523	F:nucleic acid binding; F:RNA-DNA hybrid ribonuclease activity	IPR002156 (PFAM); IPR036397 (G3DSA:3.30.420.GENE3D); IPR000477 (PFAM); mobidb-lite (MOBIDB_LITE); PTHR19446:SF427 (PANTHER); PTHR19446 (PANTHER); IPR000477 (PROSITE_PROFILES); IPR002156 (PROSITE_PROFILES); cd09276 (CDD); IPR012337 (SUPERFAMILY)	uncharacterized protein LOC111106094	no GO terms	no GO terms
Cnem000742-RA	435	XP_032895449.1	75.3	636.0	A0A0L8HAD3	53.7	359.4	no hit	no GO terms	no GO terms	IPR025398 (PFAM); PTHR45935:SF4 (PANTHER); PTHR45935 (PANTHER); IPR012337 (SUPERFAMILY)	SCAN domain-containing protein 3-like	no GO terms	no GO terms
Cnem000746-RA	397	XP_029640952.1	52.8	124.4	H3A5L3	49.5	116.3	no hit	no GO terms	no GO terms	IPR000477 (PFAM); IPR036691 (G3DSA:3.60.10.GENE3D); G3DSA:3.30.420.470 (GENE3D); IPR001888 (PFAM); PTHR46060 (PANTHER); CYTOPLASMIC_DOMAIN (PHOBIUS); NON_CYTOPLASMIC_DOMAIN (PHOBIUS); TRANSMEMBRANE (PHOBIUS); IPR000477 (PROSITE_PROFILES); TMhelix (TMHMM)	hypothetical protein EGW08_012163	P:GO:0090502; F:GO:0003676; F:GO:0004523	P:RNA phosphodiester bond hydrolysis, endonucleolytic; F:nucleic acid binding; F:RNA-DNA hybrid ribonuclease activity
Cnem000752-RA	311	AXI69352.1	66.7	166.0	A0A2G8KD34	34.6	66.6	no hit	no IPS match	no IPS match	no IPS match	RNA-directed DNA polymerase	P:GO:0006278; F:GO:0003964	P:RNA-dependent DNA biosynthetic process; F:RNA-directed DNA polymerase activity
Cnem000755-RA	142	RUS70812.1	53.8	62.8	A0A433SNT6	53.8	62.8	no hit	no GO terms	no GO terms	IPR009535 (PFAM); SSF69989 (SUPERFAMILY)	hypothetical protein EGW08_021432	no GO terms	no GO terms
Cnem000756-RA	731	NNK27532.1	37.9	492.3	W4Y5A2	41.9	459.5	no hit	no GO terms	no GO terms	IPR000477 (PFAM); PTHR47027 (PANTHER); PTHR47027:SF6 (PANTHER); IPR000477 (PROSITE_PROFILES); cd01650 (CDD); IPR043502 (SUPERFAMILY)	RNA-directed DNA polymerase	no GO terms	no GO terms
Cnem000757-RA	732	RUS88711.1	46.6	435.6	A0A433U4I6	46.6	435.6	no hit	F:GO:0003676; F:GO:0004523	F:nucleic acid binding; F:RNA-DNA hybrid ribonuclease activity	IPR002156 (PFAM); IPR036691 (G3DSA:3.60.10.GENE3D); IPR036397 (G3DSA:3.30.420.GENE3D); mobidb-lite (MOBIDB_LITE); mobidb-lite (MOBIDB_LITE); IPR002156 (PROSITE_PROFILES); IPR036691 (SUPERFAMILY); IPR012337 (SUPERFAMILY)	hypothetical protein EGW08_003526	P:GO:0090502; F:GO:0003676; F:GO:0004523	P:RNA phosphodiester bond hydrolysis, endonucleolytic; F:nucleic acid binding; F:RNA-DNA hybrid ribonuclease activity
Cnem000763-RA	466	KYN06623.1	45.1	114.8	A0A151IN29	45.1	114.8	no hit	no GO terms	no GO terms	Coil (COILS)	hypothetical protein ALC62_02426	no GO terms	no GO terms
Cnem000767-RA	441	XP_032895449.1	61.2	593.2	D3ZTR5	33.5	282.3	no hit	no GO terms	no GO terms	PTHR45935:SF4 (PANTHER); PTHR45935 (PANTHER); PTHR45935:SF4 (PANTHER); PTHR45935 (PANTHER); IPR012337 (SUPERFAMILY)	SCAN domain-containing protein 3-like	no GO terms	no GO terms
Cnem000768-RA	402	PIK37320.1	65.7	348.2	A0A2G8JNL6	65.7	348.2	no hit	no GO terms	no GO terms	IPR000477 (PFAM); PTHR19446:SF411 (PANTHER); PTHR19446:SF411 (PANTHER); PTHR19446 (PANTHER); IPR000477 (PROSITE_PROFILES); cd01650 (CDD)	hypothetical protein BSL78_25845	no GO terms	no GO terms
Cnem000772-RA	542	RUS88711.1	53.6	312.8	A0A433U4I6	53.6	312.8	no hit	no GO terms	no GO terms	IPR000477 (PFAM); mobidb-lite (MOBIDB_LITE); mobidb-lite (MOBIDB_LITE); PTHR33332:SF19 (PANTHER); PTHR33332 (PANTHER); IPR000477 (PROSITE_PROFILES); cd01650 (CDD); IPR043502 (SUPERFAMILY)	hypothetical protein EGW08_003526	P:GO:0090502; F:GO:0003676; F:GO:0004523	P:RNA phosphodiester bond hydrolysis, endonucleolytic; F:nucleic acid binding; F:RNA-DNA hybrid ribonuclease activity
Cnem000780-RA	388	XP_013063503.1	81.9	629.8	A0A2C9LRB0	81.9	629.8	K14613	P:GO:0055085; F:GO:0022857	P:transmembrane transport; F:transmembrane transporter activity	IPR011701 (PFAM); G3DSA:1.20.1250.20 (GENE3D); PTHR23507 (PANTHER); cd17448 (CDD); cd17330 (CDD); IPR036259 (SUPERFAMILY)	solute carrier family 46 member 3-like	P:GO:0055085; F:GO:0022857; C:GO:0016021	P:transmembrane transport; F:transmembrane transporter activity; C:integral component of membrane
Cnem000783-RA	1253	XP_012942976.1	79.5	1619.4	A0A2C9KAE0	79.7	1565.1	K12231	F:GO:0005515	F:protein binding	IPR011989 (G3DSA:1.25.10.GENE3D); IPR002110 (PFAM); mobidb-lite (MOBIDB_LITE); mobidb-lite (MOBIDB_LITE); mobidb-lite (MOBIDB_LITE); mobidb-lite (MOBIDB_LITE); mobidb-lite (MOBIDB_LITE); mobidb-lite (MOBIDB_LITE); PTHR45670 (PANTHER); PTHR45670 (PANTHER); PTHR45670:SF2 (PANTHER); PTHR45670:SF2 (PANTHER); IPR002110 (PROSITE_PROFILES); IPR020683 (PROSITE_PROFILES); IPR016024 (SUPERFAMILY); IPR03677…	E3 ubiquitin-protein ligase HECTD1-like isoform X7	no GO terms	no GO terms
Cnem000786-RA	211	XP_012942946.1	83.5	341.3	A0A2C9KAE0	83.9	338.2	no hit	F:GO:0004842	F:ubiquitin-protein transferase activity	IPR000569 (PFAM); G3DSA:3.30.2160.10 (GENE3D); PTHR45670:SF2 (PANTHER); PTHR45670 (PANTHER); IPR000569 (PROSITE_PROFILES); IPR035983 (SUPERFAMILY)	E3 ubiquitin-protein ligase HECTD1-like isoform X8	no GO terms	no GO terms
Cnem000788-RA	146	XP_012942946.1	96.5	296.6	A0A3S1CAR9	91.7	283.5	K10590	F:GO:0004842	F:ubiquitin-protein transferase activity	G3DSA:3.30.2410.10 (GENE3D); IPR000569 (PFAM); PTHR45670:SF2 (PANTHER); PTHR45670 (PANTHER); IPR000569 (PROSITE_PROFILES); IPR035983 (SUPERFAMILY)	E3 ubiquitin-protein ligase HECTD1-like isoform X8	no GO terms	no GO terms
Cnem000796-RA	637	PZC71182.1	29.6	233.4	A0A3Q1LQW1	31.9	276.9	no hit	no GO terms	no GO terms	IPR000477 (PFAM); IPR036691 (G3DSA:3.60.10.GENE3D); mobidb-lite (MOBIDB_LITE); mobidb-lite (MOBIDB_LITE); PTHR47027:SF6 (PANTHER); PTHR47027 (PANTHER); IPR000477 (PROSITE_PROFILES); cd09076 (CDD); IPR036691 (SUPERFAMILY); IPR043502 (SUPERFAMILY)	hypothetical protein parPi_0000509	no GO terms	no GO terms
Cnem000797-RA	928	XP_033096660.1	47.1	602.8	W4YBG1	40.4	615.9	no hit	no GO terms	no GO terms	mobidb-lite (MOBIDB_LITE); PTHR21301 (PANTHER); PTHR21301 (PANTHER); PTHR21301:SF5 (PANTHER); IPR000477 (PROSITE_PROFILES); cd10442 (CDD)	uncharacterized protein LOC117100924	no GO terms	no GO terms
Cnem000805-RA	482	RUS81811.1	33.8	167.5	A0A3S1BEI4	33.8	167.5	no hit	F:GO:0003676; F:GO:0004523	F:nucleic acid binding; F:RNA-DNA hybrid ribonuclease activity	IPR000477 (PFAM); IPR002156 (PFAM); IPR036397 (G3DSA:3.30.420.GENE3D); mobidb-lite (MOBIDB_LITE); PTHR10642 (PANTHER); PTHR10642:SF0 (PANTHER); IPR002156 (PROSITE_PROFILES); IPR000477 (PROSITE_PROFILES); cd09276 (CDD); IPR012337 (SUPERFAMILY)	uncharacterized protein LOC111106094	no GO terms	no GO terms
Cnem000808-RA	162	GCF40140.1	36.9	79.0	A0A433U5M4	31.3	62.0	no hit	no GO terms	no GO terms	PTHR47027:SF6 (PANTHER); PTHR47027 (PANTHER)	hypothetical protein parPi_0000614	P:GO:0036092; F:GO:0016316	P:phosphatidylinositol-3-phosphate biosynthetic process; F:phosphatidylinositol-3,4-bisphosphate 4-phosphatase activity
Cnem000809-RA	1135	OOZ58401.1	46.7	898.3	W4XIZ7	33.3	505.4	no hit	P:GO:0015074; F:GO:0003676	P:DNA integration; F:nucleic acid binding	IPR041588 (PFAM); G3DSA:3.10.20.370 (GENE3D); IPR036397 (G3DSA:3.30.420.GENE3D); IPR043128 (G3DSA:3.30.70.GENE3D); IPR041373 (PFAM); IPR001584 (PFAM); IPR043128 (G3DSA:3.30.70.GENE3D); IPR000477 (PFAM); G3DSA:1.10.340.70 (GENE3D); G3DSA:3.10.10.10 (GENE3D); mobidb-lite (MOBIDB_LITE); mobidb-lite (MOBIDB_LITE); PTHR24559:SF269 (PANTHER); PTHR24559:SF269 (PANTHER); PTHR24559 (PANTHER); IPR000477 (P…	hypothetical protein BOW44_13110, partial	no GO terms	no GO terms
Cnem000820-RA	1634	XP_020629946.1	31.0	560.5	W4XIZ8	28.0	515.4	no hit	P:GO:0015074; F:GO:0003676	P:DNA integration; F:nucleic acid binding	IPR043128 (G3DSA:3.30.70.GENE3D); IPR018061 (PFAM); G3DSA:1.10.340.70 (GENE3D); G3DSA:3.10.20.370 (GENE3D); IPR021109 (G3DSA:2.40.70.GENE3D); IPR043128 (G3DSA:3.30.70.GENE3D); IPR000477 (PFAM); IPR041588 (PFAM); IPR001584 (PFAM); IPR041373 (PFAM); G3DSA:3.10.10.10 (GENE3D); IPR036397 (G3DSA:3.30.420.GENE3D); mobidb-lite (MOBIDB_LITE); PTHR24559 (PANTHER); PTHR24559 (PANTHER); PTHR24559:SF269 (PAN…	DDE-type integrase/transposase/recombinase	no GO terms	no GO terms
Cnem000826-RA	147	PIK36482.1	31.6	62.8	A0A2G8JL44	31.6	62.8	no hit	no IPS match	no IPS match	no IPS match	endonuclease-reverse transcriptase	P:GO:0006278; P:GO:0090305; F:GO:0003964; F:GO:0004519	P:RNA-dependent DNA biosynthetic process; P:nucleic acid phosphodiester bond hydrolysis; F:RNA-directed DNA polymerase activity; F:endonuclease activity
Cnem000835-RA	1767	WP_144078600.1	42.2	939.9	W4XIZ7	27.8	520.0	no hit	P:GO:0015074; F:GO:0003676	P:DNA integration; F:nucleic acid binding	IPR018061 (PFAM); G3DSA:3.10.10.10 (GENE3D); IPR001584 (PFAM); IPR041588 (PFAM); G3DSA:3.10.20.370 (GENE3D); IPR021109 (G3DSA:2.40.70.GENE3D); IPR041373 (PFAM); IPR000477 (PFAM); IPR043128 (G3DSA:3.30.70.GENE3D); IPR043128 (G3DSA:3.30.70.GENE3D); IPR036397 (G3DSA:3.30.420.GENE3D); G3DSA:1.10.340.70 (GENE3D); mobidb-lite (MOBIDB_LITE); mobidb-lite (MOBIDB_LITE); mobidb-lite (MOBIDB_LITE); mobidb-l…	DDE-type integrase/transposase/recombinase	no GO terms	no GO terms
Cnem000836-RA	881	KAF0296300.1	26.7	293.1	A0A3Q2ZQ74	26.6	137.1	no hit	no GO terms	no GO terms	IPR036691 (G3DSA:3.60.10.GENE3D); IPR000477 (PFAM); IPR005135 (PFAM); PTHR19446:SF425 (PANTHER); PTHR19446 (PANTHER); IPR000477 (PROSITE_PROFILES); IPR036691 (SUPERFAMILY); IPR043502 (SUPERFAMILY)	RNA-directed DNA polymerase from mobile element jockey-like	no GO terms	no GO terms
Cnem000838-RA	798	KAF0304940.1	28.6	290.0	A0A3Q2ZQ74	25.0	154.5	no hit	no GO terms	no GO terms	IPR000477 (PFAM); IPR005135 (PFAM); IPR036691 (G3DSA:3.60.10.GENE3D); PTHR19446 (PANTHER); IPR000477 (PROSITE_PROFILES); IPR036691 (SUPERFAMILY); IPR043502 (SUPERFAMILY)	hypothetical protein EGW08_003526	P:GO:0090502; F:GO:0003676; F:GO:0004523	P:RNA phosphodiester bond hydrolysis, endonucleolytic; F:nucleic acid binding; F:RNA-DNA hybrid ribonuclease activity
Cnem000843-RA	426	RUS88711.1	41.8	313.9	A0A433U4I6	41.8	313.9	no hit	F:GO:0003676; F:GO:0004523	F:nucleic acid binding; F:RNA-DNA hybrid ribonuclease activity	IPR002156 (PFAM); IPR036397 (G3DSA:3.30.420.GENE3D); IPR012337 (SUPERFAMILY)	hypothetical protein EGW08_003526	P:GO:0090502; F:GO:0003676; F:GO:0004523	P:RNA phosphodiester bond hydrolysis, endonucleolytic; F:nucleic acid binding; F:RNA-DNA hybrid ribonuclease activity
Cnem000849-RA	1361	RUS88711.1	46.9	495.7	A0A433U4I6	46.9	495.7	no hit	F:GO:0003676; F:GO:0004523	F:nucleic acid binding; F:RNA-DNA hybrid ribonuclease activity	IPR036397 (G3DSA:3.30.420.GENE3D); IPR043128 (G3DSA:3.30.70.GENE3D); IPR036397 (G3DSA:3.30.420.GENE3D); IPR002156 (PFAM); IPR000477 (PFAM); G3DSA:3.10.10.10 (GENE3D); PTHR19446 (PANTHER); PTHR19446:SF427 (PANTHER); PTHR19446:SF427 (PANTHER); PTHR19446 (PANTHER); IPR002156 (PROSITE_PROFILES); IPR002156 (PROSITE_PROFILES); IPR000477 (PROSITE_PROFILES); IPR000477 (PROSITE_PROFILES); cd01650 (CDD); c…	hypothetical protein EGW08_003526	P:GO:0090502; F:GO:0003676; F:GO:0004523	P:RNA phosphodiester bond hydrolysis, endonucleolytic; F:nucleic acid binding; F:RNA-DNA hybrid ribonuclease activity
Cnem000851-RA	432	RUS88711.1	41.0	260.4	A0A433U4I6	41.0	260.4	no hit	no GO terms	no GO terms	IPR000477 (PFAM); PTHR33332 (PANTHER); PTHR33332:SF6 (PANTHER); IPR000477 (PROSITE_PROFILES)	hypothetical protein EGW08_003526	P:GO:0090502; F:GO:0003676; F:GO:0004523	P:RNA phosphodiester bond hydrolysis, endonucleolytic; F:nucleic acid binding; F:RNA-DNA hybrid ribonuclease activity
Cnem000852-RA	590	VEN57771.1	39.7	436.0	A0A433SZH0	35.5	392.1	no hit	no GO terms	no GO terms	IPR005135 (PFAM); IPR000477 (PFAM); IPR036691 (G3DSA:3.60.10.GENE3D); mobidb-lite (MOBIDB_LITE); PTHR23227:SF57 (PANTHER); IPR027124 (PANTHER); IPR000477 (PROSITE_PROFILES); cd09076 (CDD); IPR036691 (SUPERFAMILY)	unnamed protein product	no GO terms	no GO terms
Cnem000860-RA	809	RUS68506.1	46.3	520.8	A0A3S0Z3I7	46.3	520.8	no hit	no GO terms	no GO terms	IPR000477 (PFAM); PTHR47027:SF5 (PANTHER); PTHR47027 (PANTHER); IPR000477 (PROSITE_PROFILES); cd01650 (CDD); IPR043502 (SUPERFAMILY)	hypothetical protein EGW08_009979	no GO terms	no GO terms
Cnem000864-RA	854	RUS88711.1	40.7	450.3	A0A433U4I6	40.7	450.3	no hit	F:GO:0003676; F:GO:0004523	F:nucleic acid binding; F:RNA-DNA hybrid ribonuclease activity	IPR000477 (PFAM); IPR036397 (G3DSA:3.30.420.GENE3D); IPR002156 (PFAM); PTHR19446 (PANTHER); PTHR19446:SF427 (PANTHER); IPR002156 (PROSITE_PROFILES); IPR000477 (PROSITE_PROFILES); cd09276 (CDD); cd01650 (CDD); IPR012337 (SUPERFAMILY); IPR043502 (SUPERFAMILY)	hypothetical protein EGW08_003526	P:GO:0090502; F:GO:0003676; F:GO:0004523	P:RNA phosphodiester bond hydrolysis, endonucleolytic; F:nucleic acid binding; F:RNA-DNA hybrid ribonuclease activity
Cnem000867-RA	278	XP_005097935.1	28.3	157.1	A0A3S0ZYQ8	34.8	83.6	no hit	no GO terms	no GO terms	IPR005135 (PFAM); IPR036691 (G3DSA:3.60.10.GENE3D); IPR036691 (SUPERFAMILY)	PREDICTED: uncharacterized protein LOC106011589	no GO terms	no GO terms
Cnem000870-RA	981	WP_078461487.1;OOY49051.1	48.3	857.1	A0A3S1ASJ4	42.0	745.3	no hit	F:GO:0003676; F:GO:0004523	F:nucleic acid binding; F:RNA-DNA hybrid ribonuclease activity	IPR036397 (G3DSA:3.30.420.GENE3D); IPR000477 (PFAM); IPR002156 (PFAM); PTHR19446:SF427 (PANTHER); PTHR19446 (PANTHER); IPR000477 (PROSITE_PROFILES); IPR002156 (PROSITE_PROFILES); cd09276 (CDD); cd01650 (CDD); IPR012337 (SUPERFAMILY)	hypothetical protein	no GO terms	no GO terms
Cnem000877-RA	244	no hit	no hit	no hit	no hit	no hit	no hit	no hit	no IPS match	no IPS match	no IPS match	uncharacterized protein LOC116615040	no GO terms	no GO terms
Cnem000886-RA	236	XP_014677047.1	36.2	141.4	A0A3P8SR08	38.2	129.8	no hit	no IPS match	no IPS match	no IPS match	PREDICTED: uncharacterized protein LOC106816918	no GO terms	no GO terms
Cnem000895-RA	528	RUS88711.1	36.6	322.8	A0A433U4I6	36.6	322.8	no hit	F:GO:0003676; F:GO:0004523	F:nucleic acid binding; F:RNA-DNA hybrid ribonuclease activity	IPR036397 (G3DSA:3.30.420.GENE3D); IPR002156 (PFAM); PTHR33332 (PANTHER); PTHR33332:SF6 (PANTHER); IPR002156 (PROSITE_PROFILES); cd09276 (CDD); IPR012337 (SUPERFAMILY)	hypothetical protein EGW08_003526	P:GO:0090502; F:GO:0003676; F:GO:0004523	P:RNA phosphodiester bond hydrolysis, endonucleolytic; F:nucleic acid binding; F:RNA-DNA hybrid ribonuclease activity
Cnem000897-RA	1384	RUS88711.1	51.5	406.4	A0A433U4I6	51.5	406.4	no hit	F:GO:0003676; F:GO:0004523	F:nucleic acid binding; F:RNA-DNA hybrid ribonuclease activity	IPR002156 (PFAM); IPR005135 (PFAM); IPR000477 (PFAM); IPR036397 (G3DSA:3.30.420.GENE3D); IPR036691 (G3DSA:3.60.10.GENE3D); PTHR33332:SF6 (PANTHER); PTHR33332 (PANTHER); IPR002156 (PROSITE_PROFILES); IPR000477 (PROSITE_PROFILES); cd01650 (CDD); cd09276 (CDD); IPR036691 (SUPERFAMILY); IPR043502 (SUPERFAMILY); IPR012337 (SUPERFAMILY)	hypothetical protein EGW08_003526	P:GO:0090502; F:GO:0003676; F:GO:0004523	P:RNA phosphodiester bond hydrolysis, endonucleolytic; F:nucleic acid binding; F:RNA-DNA hybrid ribonuclease activity
Cnem000902-RA	645	KAF0305860.1	28.1	271.6	A0A433U4I6	42.3	268.1	no hit	no GO terms	no GO terms	IPR000477 (PFAM); PTHR19446:SF425 (PANTHER); PTHR19446 (PANTHER); IPR000477 (PROSITE_PROFILES); IPR043502 (SUPERFAMILY)	hypothetical protein EGW08_003526	P:GO:0090502; F:GO:0003676; F:GO:0004523	P:RNA phosphodiester bond hydrolysis, endonucleolytic; F:nucleic acid binding; F:RNA-DNA hybrid ribonuclease activity
Cnem000905-RA	638	RUS88711.1	40.1	430.6	A0A433U4I6	40.1	430.6	no hit	no GO terms	no GO terms	IPR000477 (PFAM); PTHR33332:SF19 (PANTHER); PTHR33332 (PANTHER); IPR000477 (PROSITE_PROFILES); IPR043502 (SUPERFAMILY); IPR012337 (SUPERFAMILY)	hypothetical protein EGW08_003526	P:GO:0090502; F:GO:0003676; F:GO:0004523	P:RNA phosphodiester bond hydrolysis, endonucleolytic; F:nucleic acid binding; F:RNA-DNA hybrid ribonuclease activity
Cnem000908-RA	642	RUS88711.1	43.8	381.3	A0A433U4I6	43.8	381.3	no hit	F:GO:0003676	F:nucleic acid binding	IPR000477 (PFAM); IPR036397 (G3DSA:3.30.420.GENE3D); PTHR19446:SF427 (PANTHER); PTHR19446 (PANTHER); IPR000477 (PROSITE_PROFILES); IPR043502 (SUPERFAMILY)	hypothetical protein EGW08_003526	P:GO:0090502; F:GO:0003676; F:GO:0004523	P:RNA phosphodiester bond hydrolysis, endonucleolytic; F:nucleic acid binding; F:RNA-DNA hybrid ribonuclease activity
Cnem000909-RA	165	no hit	no hit	no hit	no hit	no hit	no hit	no hit	no IPS match	no IPS match	no IPS match	---NA---	no GO terms	no GO terms
Cnem000914-RA	375	KXJ10292.1	41.8	159.5	A0A3S0ZVZ5	38.1	147.5	no hit	no GO terms	no GO terms	Coil (COILS); mobidb-lite (MOBIDB_LITE); PTHR47027 (PANTHER); PTHR47027:SF6 (PANTHER); SIGNAL_PEPTIDE (PHOBIUS); NON_CYTOPLASMIC_DOMAIN (PHOBIUS); SIGNAL_PEPTIDE_C_REGION (PHOBIUS); SIGNAL_PEPTIDE_N_REGION (PHOBIUS); SIGNAL_PEPTIDE_H_REGION (PHOBIUS)	putative uncharacterized transposon-derived protein F52C9.6	no GO terms	no GO terms
Cnem000916-RA	661	KAF0314667.1	31.7	281.2	A0A433U4I6	39.5	270.4	no hit	F:GO:0003676; F:GO:0004523	F:nucleic acid binding; F:RNA-DNA hybrid ribonuclease activity	Coil (COILS); IPR002156 (PFAM); IPR000477 (PFAM); IPR036397 (G3DSA:3.30.420.GENE3D); PTHR33332 (PANTHER); IPR002156 (PROSITE_PROFILES); cd01650 (CDD); IPR043502 (SUPERFAMILY); IPR012337 (SUPERFAMILY)	RNA-directed DNA polymerase from mobile element jockey-like	no GO terms	no GO terms
Cnem000919-RA	506	XP_012941430.1	49.2	244.2	A0A433SS31	45.2	225.3	no hit	no GO terms	no GO terms	IPR000034 (SMART); IPR000034 (PFAM); G3DSA:2.170.300.10 (GENE3D); IPR002049 (PFAM); mobidb-lite (MOBIDB_LITE); mobidb-lite (MOBIDB_LITE); mobidb-lite (MOBIDB_LITE); PTHR10574 (PANTHER); PTHR10574:SF291 (PANTHER); CYTOPLASMIC_DOMAIN (PHOBIUS); TRANSMEMBRANE (PHOBIUS); NON_CYTOPLASMIC_DOMAIN (PHOBIUS); IPR000034 (PROSITE_PROFILES); cd00055 (CDD)	laminin subunit alpha-1-like	no GO terms	no GO terms
Cnem000924-RA	350	RUS72081.1	43.6	186.0	A0A433SS31	43.6	186.0	no hit	P:GO:0030155; P:GO:0030334; P:GO:0045995; F:GO:0005102	P:regulation of cell adhesion; P:regulation of cell migration; P:regulation of embryonic development; F:signaling receptor binding	Coil (COILS); Coil (COILS); IPR009254 (PFAM); PTHR10574:SF285 (PANTHER); PTHR10574 (PANTHER); SSF58104 (SUPERFAMILY)	laminin subunit alpha-1-like	no GO terms	no GO terms
Cnem000925-RA	1124	KAF0305860.1	32.6	526.9	A0A1T2L5V8	22.4	227.3	no hit	F:GO:0003676; F:GO:0004523	F:nucleic acid binding; F:RNA-DNA hybrid ribonuclease activity	IPR000477 (PFAM); IPR002156 (PFAM); IPR005135 (PFAM); IPR036397 (G3DSA:3.30.420.GENE3D); IPR036691 (G3DSA:3.60.10.GENE3D); PTHR19446 (PANTHER); PTHR19446:SF427 (PANTHER); IPR002156 (PROSITE_PROFILES); IPR000477 (PROSITE_PROFILES); cd09276 (CDD); cd01650 (CDD); IPR043502 (SUPERFAMILY); IPR012337 (SUPERFAMILY); IPR036691 (SUPERFAMILY)	putative RNA-directed DNA polymerase from transposon X-element	P:GO:0006278; P:GO:0090502; F:GO:0003676; F:GO:0003964; F:GO:0004523	P:RNA-dependent DNA biosynthetic process; P:RNA phosphodiester bond hydrolysis, endonucleolytic; F:nucleic acid binding; F:RNA-directed DNA polymerase activity; F:RNA-DNA hybrid ribonuclease activity
Cnem000926-RA	342	XP_012941430.1	58.3	88.6	A0A3S0ZQ40	36.7	82.0	no hit	no GO terms	no GO terms	mobidb-lite (MOBIDB_LITE)	laminin subunit alpha-1-like	no GO terms	no GO terms
Cnem000940-RA	323	KAA3669964.1	32.7	100.5	A0A3Q1LXQ5	33.9	100.9	no hit	no GO terms	no GO terms	Coil (COILS); PTHR47027:SF6 (PANTHER); PTHR47027 (PANTHER); CYTOPLASMIC_DOMAIN (PHOBIUS); TRANSMEMBRANE (PHOBIUS); NON_CYTOPLASMIC_DOMAIN (PHOBIUS); cd14981 (CDD); TMhelix (TMHMM)	endonuclease-reverse transcriptase-like protein	P:GO:0006278; P:GO:0090305; F:GO:0003964; F:GO:0004519	P:RNA-dependent DNA biosynthetic process; P:nucleic acid phosphodiester bond hydrolysis; F:RNA-directed DNA polymerase activity; F:endonuclease activity
Cnem000943-RA	1130	no hit	no hit	no hit	no hit	no hit	no hit	no hit	no GO terms	no GO terms	IPR012969 (PFAM); mobidb-lite (MOBIDB_LITE); mobidb-lite (MOBIDB_LITE); PTHR36144:SF3 (PANTHER); PTHR36144:SF3 (PANTHER); PTHR36144 (PANTHER); PTHR36144:SF3 (PANTHER); PTHR36144 (PANTHER)	hypothetical protein JCGZ_19285	P:GO:1903575	P:cornified envelope assembly
Cnem000944-RA	762	XP_005104581.1	73.8	1182.5	A0A2C9JHZ5	72.9	1177.2	K14018	P:GO:0043161; F:GO:0005515; F:GO:0043130	P:proteasome-mediated ubiquitin-dependent protein catabolic process; F:protein binding; F:ubiquitin binding	IPR001680 (SMART); IPR013535 (PFAM); IPR015943 (G3DSA:2.130.10.GENE3D); IPR001680 (PFAM); IPR015155 (PFAM); IPR011989 (G3DSA:1.25.10.GENE3D); IPR038122 (G3DSA:1.10.150.GENE3D); mobidb-lite (MOBIDB_LITE); IPR033510 (PANTHER); PTHR19849:SF2 (PANTHER); IPR001680 (PROSITE_PROFILES); IPR013535 (PROSITE_PROFILES); IPR001680 (PROSITE_PROFILES); IPR001680 (PROSITE_PROFILES); IPR017986 (PROSITE_PROFILES);…	phospholipase A-2-activating protein-like	P:GO:0043161; F:GO:0043130	P:proteasome-mediated ubiquitin-dependent protein catabolic process; F:ubiquitin binding
Cnem000947-RA	1384	WP_144078600.1	42.6	916.8	W4YDL7	33.4	501.5	no hit	P:GO:0015074; F:GO:0003676	P:DNA integration; F:nucleic acid binding	Coil (COILS); IPR041588 (PFAM); G3DSA:3.10.20.370 (GENE3D); PF13975 (PFAM); IPR036397 (G3DSA:3.30.420.GENE3D); G3DSA:3.10.10.10 (GENE3D); IPR001584 (PFAM); IPR021109 (G3DSA:2.40.70.GENE3D); G3DSA:1.10.340.70 (GENE3D); IPR000477 (PFAM); IPR041373 (PFAM); IPR043128 (G3DSA:3.30.70.GENE3D); mobidb-lite (MOBIDB_LITE); mobidb-lite (MOBIDB_LITE); mobidb-lite (MOBIDB_LITE); mobidb-lite (MOBIDB_LITE); PTH…	DDE-type integrase/transposase/recombinase	no GO terms	no GO terms
Cnem000952-RA	360	GBX07869.1	35.5	245.0	A0A402E714	35.4	243.0	no hit	no GO terms	no GO terms	IPR000477 (PFAM); PTHR19446:SF427 (PANTHER); PTHR19446 (PANTHER); NON_CYTOPLASMIC_DOMAIN (PHOBIUS); CYTOPLASMIC_DOMAIN (PHOBIUS); TRANSMEMBRANE (PHOBIUS); IPR000477 (PROSITE_PROFILES); IPR043502 (SUPERFAMILY); TMhelix (TMHMM)	hypothetical protein parPi_0004508	no GO terms	no GO terms
Cnem000955-RA	317	no hit	no hit	no hit	no hit	no hit	no hit	no hit	no GO terms	no GO terms	IPR032675 (G3DSA:3.80.10.GENE3D); mobidb-lite (MOBIDB_LITE); mobidb-lite (MOBIDB_LITE); PTHR38218:SF10 (PANTHER); PTHR38218:SF10 (PANTHER); PTHR38218 (PANTHER); PTHR38218 (PANTHER); SSF52058 (SUPERFAMILY)	hypothetical protein ERICIV_01004	no GO terms	no GO terms
Cnem000956-RA	234	RUS80216.1	39.0	94.7	A0A3S1C192	39.0	94.7	no hit	no IPS match	no IPS match	no IPS match	hypothetical protein EGW08_012012	no GO terms	no GO terms
Cnem000960-RA	1288	WP_144078600.1	42.3	922.9	W4YDL7	34.1	528.5	no hit	P:GO:0015074; F:GO:0003676	P:DNA integration; F:nucleic acid binding	Coil (COILS); IPR041588 (PFAM); IPR000477 (PFAM); IPR036397 (G3DSA:3.30.420.GENE3D); IPR041373 (PFAM); IPR043128 (G3DSA:3.30.70.GENE3D); IPR043128 (G3DSA:3.30.70.GENE3D); IPR001584 (PFAM); G3DSA:3.10.10.10 (GENE3D); G3DSA:3.10.20.370 (GENE3D); G3DSA:1.10.340.70 (GENE3D); mobidb-lite (MOBIDB_LITE); mobidb-lite (MOBIDB_LITE); mobidb-lite (MOBIDB_LITE); mobidb-lite (MOBIDB_LITE); mobidb-lite (MOBIDB…	DDE-type integrase/transposase/recombinase	no GO terms	no GO terms
Cnem000961-RA	585	XP_012937187.1	35.4	176.4	A0A433U4I6	33.9	160.6	no hit	F:GO:0003676; F:GO:0004523	F:nucleic acid binding; F:RNA-DNA hybrid ribonuclease activity	IPR000477 (PFAM); IPR036397 (G3DSA:3.30.420.GENE3D); PTHR19446:SF425 (PANTHER); PTHR19446 (PANTHER); IPR000477 (PROSITE_PROFILES); IPR002156 (PROSITE_PROFILES); IPR043502 (SUPERFAMILY); IPR012337 (SUPERFAMILY)	PREDICTED: uncharacterized protein LOC106013216	no GO terms	no GO terms
Cnem000965-RA	269	XP_013074686.1	64.0	306.6	A0A2C9LFY9	64.0	306.6	K04984	P:GO:0006811; P:GO:0055085; F:GO:0005216; C:GO:0016020	P:ion transport; P:transmembrane transport; F:ion channel activity; C:membrane	IPR005821 (PFAM); mobidb-lite (MOBIDB_LITE); PTHR24190 (PANTHER); NON_CYTOPLASMIC_DOMAIN (PHOBIUS); TRANSMEMBRANE (PHOBIUS); CYTOPLASMIC_DOMAIN (PHOBIUS); TRANSMEMBRANE (PHOBIUS); TRANSMEMBRANE (PHOBIUS); NON_CYTOPLASMIC_DOMAIN (PHOBIUS); CYTOPLASMIC_DOMAIN (PHOBIUS); TMhelix (TMHMM); TMhelix (TMHMM); TMhelix (TMHMM)	transient receptor potential cation channel subfamily A member 1-like	no GO terms	no GO terms
Cnem000969-RA	212	RUS70130.1	82.6	262.7	A0A433SLX2	82.6	262.7	no hit	F:GO:0005515	F:protein binding	IPR003591 (SMART); IPR001611 (PFAM); IPR032675 (G3DSA:3.80.10.GENE3D); IPR001611 (PFAM); PTHR45752 (PANTHER); PTHR45752:SF4 (PANTHER); CYTOPLASMIC_DOMAIN (PHOBIUS); TRANSMEMBRANE (PHOBIUS); NON_CYTOPLASMIC_DOMAIN (PHOBIUS); IPR001611 (PROSITE_PROFILES); IPR001611 (PROSITE_PROFILES); IPR001611 (PROSITE_PROFILES); IPR001611 (PROSITE_PROFILES); SSF52058 (SUPERFAMILY); TMhelix (TMHMM)	leucine-rich repeat-containing protein 59-like	no GO terms	no GO terms
Cnem000977-RA	157	RUS90919.1	42.5	137.9	A0A3S1A548	42.5	137.9	no hit	no IPS match	no IPS match	no IPS match	hypothetical protein EGW08_001316	no GO terms	no GO terms
Cnem000980-RA	222	XP_014776287.1	66.4	167.9	A0A2J7QLR8	50.7	156.8	no hit	no GO terms	no GO terms	G3DSA:3.30.420.470 (GENE3D); PTHR47326 (PANTHER)	PREDICTED: uncharacterized protein LOC106873446	no GO terms	no GO terms
Cnem000985-RA	372	KAF1313703.1	31.4	128.6	A0A183MZ39	31.5	124.0	no hit	no GO terms	no GO terms	Coil (COILS); IPR000477 (PFAM); PTHR19446 (PANTHER); PTHR19446:SF411 (PANTHER); IPR000477 (PROSITE_PROFILES)	unnamed protein product	no GO terms	no GO terms
Cnem000989-RA	426	KAE9524153.1	30.8	126.3	A0A3Q1MXT5	32.7	139.4	no hit	no GO terms	no GO terms	IPR000477 (PFAM); mobidb-lite (MOBIDB_LITE); mobidb-lite (MOBIDB_LITE); PTHR47027 (PANTHER); PTHR47027:SF6 (PANTHER)	hypothetical protein WN51_13134	no GO terms	no GO terms
Cnem001006-RA	1034	XP_013077595.1;XP_013077596.1;XP_013077597.1	37.4	638.3	A0A2C9JQF5	37.4	638.3	K10307	F:GO:0005515; F:GO:0008270; F:GO:0061630	F:protein binding; F:zinc ion binding; F:ubiquitin protein ligase activity	IPR001810 (SMART); IPR001293 (PFAM); IPR043013 (G3DSA:3.30.40.GENE3D); IPR001810 (PFAM); IPR013083 (G3DSA:3.30.40.GENE3D); G3DSA:3.30.420.470 (GENE3D); IPR001888 (PFAM); mobidb-lite (MOBIDB_LITE); mobidb-lite (MOBIDB_LITE); mobidb-lite (MOBIDB_LITE); IPR031890 (PANTHER); IPR001810 (PROSITE_PROFILES); IPR001293 (PROSITE_PROFILES); IPR036047 (SUPERFAMILY)	F-box only protein 30-like	F:GO:0046872	F:metal ion binding
Cnem001007-RA	651	WP_078461487.1;OOY49051.1	48.3	526.2	A0A3S1ASJ4	41.8	446.0	no hit	F:GO:0003676; F:GO:0004523	F:nucleic acid binding; F:RNA-DNA hybrid ribonuclease activity	IPR036397 (G3DSA:3.30.420.GENE3D); IPR002156 (PFAM); IPR000477 (PFAM); PTHR47027:SF5 (PANTHER); PTHR47027 (PANTHER); IPR002156 (PROSITE_PROFILES); IPR000477 (PROSITE_PROFILES); cd09276 (CDD); IPR012337 (SUPERFAMILY)	hypothetical protein	no GO terms	no GO terms
Cnem001010-RA	283	XP_013087094.1	30.8	70.5	A0A2C9LSB1	30.8	70.5	no hit	no GO terms	no GO terms	mobidb-lite (MOBIDB_LITE); mobidb-lite (MOBIDB_LITE)	PREDICTED: uncharacterized protein LOC106071515 isoform X2	no GO terms	no GO terms
Cnem001012-RA	213	XP_012938020.1	91.1	388.3	A0A3S1AZC5	90.6	381.7	K02989	P:GO:0006412; F:GO:0003723; F:GO:0003735; C:GO:0015935	P:translation; F:RNA binding; F:structural constituent of ribosome; C:small ribosomal subunit	IPR000235 (PIRSF); IPR005716 (TIGRFAM); IPR023798 (PFAM); IPR036823 (G3DSA:1.10.455.GENE3D); PTHR11205:SF34 (PANTHER); IPR000235 (PANTHER); IPR020606 (PROSITE_PATTERNS); IPR005716 (CDD); IPR036823 (SUPERFAMILY)	hypothetical protein EGW08_021154	P:GO:0006412; F:GO:0003723; F:GO:0003735; C:GO:0015935	P:translation; F:RNA binding; F:structural constituent of ribosome; C:small ribosomal subunit
Cnem001018-RA	483	XP_013086510.1;XP_013086511.1	77.9	438.3	A0A2C9JWQ8	77.9	438.3	K00826	F:GO:0003824	F:catalytic activity	IPR001544 (PFAM); IPR043131 (G3DSA:3.30.470.GENE3D); IPR043132 (G3DSA:3.20.10.GENE3D); PTHR11825 (PANTHER); SIGNAL_PEPTIDE_C_REGION (PHOBIUS); NON_CYTOPLASMIC_DOMAIN (PHOBIUS); SIGNAL_PEPTIDE (PHOBIUS); SIGNAL_PEPTIDE_N_REGION (PHOBIUS); SIGNAL_PEPTIDE_H_REGION (PHOBIUS); SignalP-TM (SIGNALP_GRAM_POSITIVE); SignalP-noTM (SIGNALP_EUK); IPR036038 (SUPERFAMILY)	branched-chain-amino-acid aminotransferase, cytosolic-like	no GO terms	no GO terms
Cnem001032-RA	704	XP_012940510.1	36.8	181.0	A0A139W939	25.4	125.6	no hit	F:GO:0003676; F:GO:0004523	F:nucleic acid binding; F:RNA-DNA hybrid ribonuclease activity	IPR002156 (PFAM); IPR000477 (PFAM); IPR036397 (G3DSA:3.30.420.GENE3D); PTHR19446:SF427 (PANTHER); PTHR19446 (PANTHER); PTHR19446:SF427 (PANTHER); NON_CYTOPLASMIC_DOMAIN (PHOBIUS); CYTOPLASMIC_DOMAIN (PHOBIUS); TRANSMEMBRANE (PHOBIUS); IPR000477 (PROSITE_PROFILES); IPR002156 (PROSITE_PROFILES); cd09276 (CDD); cd01650 (CDD); IPR043502 (SUPERFAMILY); IPR012337 (SUPERFAMILY)	putative RNA-directed DNA polymerase from transposon BS	P:GO:0006278; P:GO:0090502; F:GO:0003676; F:GO:0003964; F:GO:0004523	P:RNA-dependent DNA biosynthetic process; P:RNA phosphodiester bond hydrolysis, endonucleolytic; F:nucleic acid binding; F:RNA-directed DNA polymerase activity; F:RNA-DNA hybrid ribonuclease activity
Cnem001034-RA	206	KHF24557.1	55.4	82.0	A0A0B0H7C2	55.4	82.0	no hit	no GO terms	no GO terms	NON_CYTOPLASMIC_DOMAIN (PHOBIUS); TRANSMEMBRANE (PHOBIUS); CYTOPLASMIC_DOMAIN (PHOBIUS); TMhelix (TMHMM)	hypothetical protein HmN_000322800	no GO terms	no GO terms
Cnem001040-RA	277	XP_013065787.1	80.2	396.0	A0A2C9JDL7	80.2	396.0	no hit	P:GO:0016556; F:GO:0003676; F:GO:0003727; C:GO:0030895	P:mRNA modification; F:nucleic acid binding; F:single-stranded RNA binding; C:apolipoprotein B mRNA editing enzyme complex	IPR000504 (SMART); IPR012677 (G3DSA:3.30.70.GENE3D); IPR006535 (TIGRFAM); IPR000504 (PFAM); IPR012677 (G3DSA:3.30.70.GENE3D); IPR033111 (PTHR21245:PANTHER); PTHR21245 (PANTHER); IPR000504 (PROSITE_PROFILES); IPR000504 (PROSITE_PROFILES); cd12249 (CDD); IPR035979 (SUPERFAMILY)	APOBEC1 complementation factor-like isoform X3	no GO terms	no GO terms
Cnem001042-RA	956	RUS68506.1	43.7	792.3	A0A3S0Z3I7	43.7	792.3	no hit	no GO terms	no GO terms	Coil (COILS); IPR005135 (PFAM); IPR000477 (PFAM); IPR036691 (G3DSA:3.60.10.GENE3D); PTHR23227:SF68 (PANTHER); IPR027124 (PANTHER); IPR000477 (PROSITE_PROFILES); cd01650 (CDD); cd09076 (CDD); IPR036691 (SUPERFAMILY); IPR043502 (SUPERFAMILY)	hypothetical protein EGW08_023732	no GO terms	no GO terms
Cnem001044-RA	541	KAF0290124.1	31.9	281.2	A0A182G4I0	21.8	98.6	no hit	F:GO:0003676; F:GO:0004523	F:nucleic acid binding; F:RNA-DNA hybrid ribonuclease activity	IPR000477 (PFAM); IPR036397 (G3DSA:3.30.420.GENE3D); PTHR33332 (PANTHER); PTHR33332:SF6 (PANTHER); CYTOPLASMIC_DOMAIN (PHOBIUS); NON_CYTOPLASMIC_DOMAIN (PHOBIUS); TRANSMEMBRANE (PHOBIUS); IPR002156 (PROSITE_PROFILES); IPR000477 (PROSITE_PROFILES); IPR012337 (SUPERFAMILY)	hypothetical protein EGW08_003526	P:GO:0090502; F:GO:0003676; F:GO:0004523	P:RNA phosphodiester bond hydrolysis, endonucleolytic; F:nucleic acid binding; F:RNA-DNA hybrid ribonuclease activity
Cnem001049-RA	320	XP_013065791.1;XP_013065792.1	87.3	289.7	A0A2C9KVB5	87.3	289.7	no hit	F:GO:0003676; F:GO:0004523	F:nucleic acid binding; F:RNA-DNA hybrid ribonuclease activity	IPR002156 (PFAM); IPR036397 (G3DSA:3.30.420.GENE3D); IPR019141 (PFAM); mobidb-lite (MOBIDB_LITE); IPR019141 (PTHR21477:PANTHER); PTHR21477 (PANTHER); IPR002156 (PROSITE_PROFILES); IPR012337 (SUPERFAMILY)	PREDICTED: uncharacterized protein KIAA0930 homolog isoform X4	no GO terms	no GO terms
Cnem001055-RA	584	XP_005096499.1	75.0	862.4	A0A2C9JTD2	70.3	800.8	K03141	P:GO:0006289; P:GO:0006351; C:GO:0000439	P:nucleotide-excision repair; P:transcription, DNA-templated; C:transcription factor TFIIH core complex	IPR005607 (SMART); IPR011993 (G3DSA:2.30.29.GENE3D); IPR005607 (PFAM); IPR013876 (PFAM); PTHR12856:SF0 (PANTHER); IPR027079 (PANTHER); IPR005607 (PROSITE_PROFILES); IPR005607 (PROSITE_PROFILES); cd13229 (CDD); SSF50729 (SUPERFAMILY); SSF140383 (SUPERFAMILY); SSF140383 (SUPERFAMILY)	general transcription factor IIH subunit 1-like	no GO terms	no GO terms
Cnem001057-RA	365	PZC74827.1	35.3	138.7	H2YWZ5	34.8	132.9	no hit	no GO terms	no GO terms	mobidb-lite (MOBIDB_LITE); mobidb-lite (MOBIDB_LITE)	hypothetical protein B5X24_HaOG207140	no GO terms	no GO terms
Cnem001058-RA	381	RUS80216.1	39.6	226.5	A0A3S1C192	39.6	226.5	no hit	no GO terms	no GO terms	IPR036691 (G3DSA:3.60.10.GENE3D); IPR005135 (PFAM); PTHR23227:SF62 (PANTHER); IPR027124 (PANTHER); cd09076 (CDD); IPR036691 (SUPERFAMILY)	craniofacial development protein 2-like	no GO terms	no GO terms
Cnem001063-RA	869	OOZ58401.1	32.0	481.5	A0A162PPD6	26.4	206.8	no hit	P:GO:0015074; F:GO:0003676	P:DNA integration; F:nucleic acid binding	Coil (COILS); G3DSA:3.10.10.10 (GENE3D); IPR036397 (G3DSA:3.30.420.GENE3D); IPR041373 (PFAM); IPR001584 (PFAM); IPR000477 (PFAM); G3DSA:3.10.20.370 (GENE3D); IPR043128 (G3DSA:3.30.70.GENE3D); mobidb-lite (MOBIDB_LITE); mobidb-lite (MOBIDB_LITE); mobidb-lite (MOBIDB_LITE); PTHR24559 (PANTHER); PTHR24559:SF275 (PANTHER); PTHR24559:SF275 (PANTHER); PTHR24559 (PANTHER); IPR000477 (PROSITE_PROFILES); …	hypothetical protein BOW44_13110, partial	no GO terms	no GO terms
Cnem001067-RA	195	PVD34090.1	73.5	146.4	A0A2C9LP72	69.8	146.4	K12968	P:GO:0006396; F:GO:0003723; F:GO:0004000	P:RNA processing; F:RNA binding; F:adenosine deaminase activity	IPR002466 (SMART); IPR002466 (PFAM); PTHR10910 (PANTHER); PTHR10910:SF107 (PANTHER); IPR002466 (PROSITE_PROFILES)	double-stranded RNA-specific adenosine deaminase-like	no GO terms	no GO terms
Cnem001074-RA	473	XP_013065624.1	66.4	651.0	A0A2C9JDM0	66.4	651.0	K09571	P:GO:0000413; F:GO:0003755; F:GO:0005515; F:GO:0005528; F:GO:0031072	P:protein peptidyl-prolyl isomerization; F:peptidyl-prolyl cis-trans isomerase activity; F:protein binding; F:FK506 binding; F:heat shock protein binding	Coil (COILS); IPR019734 (SMART); IPR013105 (PFAM); G3DSA:3.10.50.40 (GENE3D); IPR011990 (G3DSA:1.25.40.GENE3D); G3DSA:3.10.50.40 (GENE3D); IPR001440 (PFAM); IPR001179 (PFAM); PTHR10516 (PANTHER); IPR031212 (PTHR10516:PANTHER); IPR019734 (PROSITE_PROFILES); IPR001179 (PROSITE_PROFILES); IPR001179 (PROSITE_PROFILES); IPR013026 (PROSITE_PROFILES); IPR019734 (PROSITE_PROFILES); IPR019734 (PROSITE_PRO…	peptidyl-prolyl cis-trans isomerase FKBP4-like isoform X1	no GO terms	no GO terms
Cnem001082-RA	226	XP_012942703.1	93.2	387.1	A0A2C9JTQ4	85.9	348.2	no hit	no GO terms	no GO terms	IPR008979 (G3DSA:2.60.120.GENE3D); IPR008979 (SUPERFAMILY)	PREDICTED: lactadherin-like	no GO terms	no GO terms
Cnem001088-RA	214	XP_005098082.1	32.1	79.0	no hit	no hit	no hit	no hit	no GO terms	no GO terms	TRANSMEMBRANE (PHOBIUS); NON_CYTOPLASMIC_DOMAIN (PHOBIUS); CYTOPLASMIC_DOMAIN (PHOBIUS); TMhelix (TMHMM)	PREDICTED: uncharacterized protein LOC101862727	no GO terms	no GO terms
Cnem001092-RA	225	no hit	no hit	no hit	no hit	no hit	no hit	no hit	no IPS match	no IPS match	no IPS match	---NA---	no GO terms	no GO terms
Cnem001098-RA	306	RUS88711.1	37.3	209.9	A0A433U4I6	37.3	209.9	no hit	no GO terms	no GO terms	IPR000477 (PFAM); IPR000477 (PROSITE_PROFILES)	hypothetical protein EGW08_012163	P:GO:0090502; F:GO:0003676; F:GO:0004523	P:RNA phosphodiester bond hydrolysis, endonucleolytic; F:nucleic acid binding; F:RNA-DNA hybrid ribonuclease activity
Cnem001108-RA	190	RUS76136.1	41.8	84.7	A0A3S1AZH6	41.8	84.7	no hit	no GO terms	no GO terms	mobidb-lite (MOBIDB_LITE); mobidb-lite (MOBIDB_LITE); PTHR47027 (PANTHER); PTHR47027:SF6 (PANTHER)	hypothetical protein EGW08_023500	no GO terms	no GO terms
Cnem001111-RA	351	XP_005095966.2	38.3	91.3	no hit	no hit	no hit	no hit	F:GO:0003676; F:GO:0004523	F:nucleic acid binding; F:RNA-DNA hybrid ribonuclease activity	IPR036397 (G3DSA:3.30.420.GENE3D); IPR002156 (PFAM); IPR002156 (PROSITE_PROFILES); IPR012337 (SUPERFAMILY)	hypothetical protein EGW08_003526	P:GO:0090502; F:GO:0003676; F:GO:0004523	P:RNA phosphodiester bond hydrolysis, endonucleolytic; F:nucleic acid binding; F:RNA-DNA hybrid ribonuclease activity
Cnem001113-RA	1756	WP_078461487.1;OOY49051.1	47.8	813.1	A0A3S1BCT8	40.4	651.4	no hit	P:GO:0015074; F:GO:0003676; F:GO:0004523	P:DNA integration; F:nucleic acid binding; F:RNA-DNA hybrid ribonuclease activity	IPR001584 (PFAM); IPR002156 (PFAM); IPR036397 (G3DSA:3.30.420.GENE3D); IPR041588 (PFAM); G3DSA:1.10.340.70 (GENE3D); IPR000477 (PFAM); IPR036397 (G3DSA:3.30.420.GENE3D); mobidb-lite (MOBIDB_LITE); mobidb-lite (MOBIDB_LITE); mobidb-lite (MOBIDB_LITE); mobidb-lite (MOBIDB_LITE); PTHR24559:SF275 (PANTHER); PTHR24559 (PANTHER); IPR001584 (PROSITE_PROFILES); IPR002156 (PROSITE_PROFILES); IPR000477 (PR…	hypothetical protein	no GO terms	no GO terms
Cnem001115-RA	911	XP_013082114.1;XP_013082115.1	82.2	958.7	A0A2C9JTE2	82.2	958.7	no hit	F:GO:0003676; F:GO:0004523	F:nucleic acid binding; F:RNA-DNA hybrid ribonuclease activity	PR00301 (PRINTS); IPR029048 (G3DSA:1.20.1270.GENE3D); IPR029047 (G3DSA:2.60.34.GENE3D); IPR013126 (PFAM); G3DSA:3.30.420.40 (GENE3D); G3DSA:3.30.420.40 (GENE3D); IPR002156 (PFAM); G3DSA:3.90.640.10 (GENE3D); G3DSA:3.30.420.40 (GENE3D); IPR036397 (G3DSA:3.30.420.GENE3D); IPR013126 (PANTHER); PTHR19375:SF310 (PANTHER); IPR002156 (PROSITE_PROFILES); IPR043129 (SUPERFAMILY); IPR029048 (SUPERFAMILY); …	hypothetical protein EGW08_021897	F:GO:0005524	F:ATP binding
Cnem001121-RA	319	XP_013066853.1	75.4	174.1	A0A2C9KRW4	75.4	174.1	K12836	P:GO:0000398; F:GO:0003676; F:GO:0003723; C:GO:0089701	P:mRNA splicing, via spliceosome; F:nucleic acid binding; F:RNA binding; C:U2AF complex	IPR009145 (PRINTS); IPR012677 (G3DSA:3.30.70.GENE3D); IPR009145 (PANTHER); PTHR12620:SF3 (PANTHER); IPR035979 (SUPERFAMILY)	splicing factor U2AF 35 kDa subunit-like	P:GO:0000398; F:GO:0003723; F:GO:0046872; C:GO:0089701	P:mRNA splicing, via spliceosome; F:RNA binding; F:metal ion binding; C:U2AF complex
Cnem001123-RA	204	XP_005103752.1	63.5	265.4	A0A3S0ZQ90	58.6	230.3	K02163	P:GO:0042981	P:regulation of apoptotic process	IPR026298 (PRINTS); IPR026298 (PFAM); IPR003093 (PFAM); IPR036834 (G3DSA:1.10.437.GENE3D); IPR026298 (PANTHER); IPR002475 (PROSITE_PROFILES); IPR003093 (PROSITE_PROFILES); cd06845 (CDD); IPR036834 (SUPERFAMILY)	bcl-2-like protein 2	no GO terms	no GO terms
Cnem001130-RA	294	XP_005097935.1	38.5	108.2	A0A3S0ZYQ8	32.6	90.9	no hit	no GO terms	no GO terms	IPR005135 (PFAM); IPR036691 (G3DSA:3.60.10.GENE3D); IPR036691 (SUPERFAMILY)	RNA-directed DNA polymerase from mobile element jockey-like	no GO terms	no GO terms
Cnem001132-RA	621	XP_013082114.1;XP_013082115.1	81.5	1014.6	A0A2C9JTE2	81.5	1014.6	K03283	no GO terms	no GO terms	PR00301 (PRINTS); G3DSA:3.30.420.40 (GENE3D); IPR029048 (G3DSA:1.20.1270.GENE3D); IPR029048 (G3DSA:1.20.1270.GENE3D); IPR013126 (PFAM); G3DSA:3.30.30.30 (GENE3D); IPR029047 (G3DSA:2.60.34.GENE3D); G3DSA:3.90.640.10 (GENE3D); G3DSA:3.30.420.40 (GENE3D); mobidb-lite (MOBIDB_LITE); PTHR19375:SF310 (PANTHER); IPR013126 (PANTHER); IPR013126 (PANTHER); PTHR19375:SF310 (PANTHER); cd10233 (CDD); IPR02904…	heat shock 70 kDa protein cognate 4	F:GO:0005524	F:ATP binding
Cnem001133-RA	250	no hit	no hit	no hit	no hit	no hit	no hit	no hit	no GO terms	no GO terms	mobidb-lite (MOBIDB_LITE)	PREDICTED: uncharacterized protein LOC106012563, partial	no GO terms	no GO terms
Cnem001135-RA	239	PVD34672.1	39.1	116.3	A0A2T7PMN6	39.1	116.3	no hit	no GO terms	no GO terms	IPR000477 (PFAM)	hypothetical protein	no GO terms	no GO terms
Cnem001139-RA	608	RUS88711.1	41.6	457.6	A0A433U4I6	41.6	457.6	no hit	F:GO:0003676; F:GO:0004523	F:nucleic acid binding; F:RNA-DNA hybrid ribonuclease activity	IPR000477 (PFAM); IPR036397 (G3DSA:3.30.420.GENE3D); IPR002156 (PFAM); PTHR33332 (PANTHER); PTHR33332:SF6 (PANTHER); IPR002156 (PROSITE_PROFILES); IPR000477 (PROSITE_PROFILES); cd09276 (CDD); IPR043502 (SUPERFAMILY); IPR012337 (SUPERFAMILY)	hypothetical protein EGW08_003526	P:GO:0090502; F:GO:0003676; F:GO:0004523	P:RNA phosphodiester bond hydrolysis, endonucleolytic; F:nucleic acid binding; F:RNA-DNA hybrid ribonuclease activity
Cnem001144-RA	628	XP_013082114.1;XP_013082115.1	88.4	1058.9	A0A2C9JTE2	88.4	1058.9	K03283	no GO terms	no GO terms	PR00301 (PRINTS); G3DSA:3.30.420.40 (GENE3D); G3DSA:3.30.420.40 (GENE3D); IPR013126 (PFAM); G3DSA:3.30.30.30 (GENE3D); IPR029048 (G3DSA:1.20.1270.GENE3D); IPR029047 (G3DSA:2.60.34.GENE3D); G3DSA:3.90.640.10 (GENE3D); PTHR19375:SF310 (PANTHER); IPR013126 (PANTHER); cd10233 (CDD); IPR043129 (SUPERFAMILY); IPR029047 (SUPERFAMILY); IPR043129 (SUPERFAMILY); IPR029048 (SUPERFAMILY)	heat shock 70 kDa protein cognate 4	F:GO:0005524	F:ATP binding
Cnem001145-RA	240	RUS85319.1	42.9	197.6	A0A3S1BCT8	42.9	197.6	no hit	no GO terms	no GO terms	IPR000477 (PFAM); PTHR19446 (PANTHER); PTHR19446:SF427 (PANTHER)	hypothetical protein C0Q70_05949	no GO terms	no GO terms
Cnem001154-RA	96	no hit	no hit	no hit	no hit	no hit	no hit	no hit	P:GO:0006468; F:GO:0004672; F:GO:0005524	P:protein phosphorylation; F:protein kinase activity; F:ATP binding	IPR000719 (PFAM); G3DSA:3.30.200.20 (GENE3D); PTHR44899 (PANTHER); PTHR44899:SF3 (PANTHER); IPR011009 (SUPERFAMILY)	hypothetical protein	no GO terms	no GO terms
Cnem001159-RA	229	XP_013086095.1	70.0	284.3	A0A2C9K920	70.0	284.3	K09577	F:GO:0003755; F:GO:0005509	F:peptidyl-prolyl cis-trans isomerase activity; F:calcium ion binding	G3DSA:3.10.50.40 (GENE3D); IPR001179 (PFAM); G3DSA:1.10.238.10 (GENE3D); mobidb-lite (MOBIDB_LITE); PTHR46222 (PANTHER); IPR002048 (PROSITE_PROFILES); IPR002048 (PROSITE_PROFILES); IPR001179 (PROSITE_PROFILES); IPR011992 (SUPERFAMILY); SSF54534 (SUPERFAMILY)	FK506-binding protein 2-like	P:GO:0000413; F:GO:0003755; F:GO:0005509	P:protein peptidyl-prolyl isomerization; F:peptidyl-prolyl cis-trans isomerase activity; F:calcium ion binding
Cnem001161-RA	392	XP_013095385.1;XP_013095386.1;XP_013095387.1;XP_013095388.1;XP_013095389.1	76.6	532.7	A0A182ZSI3	76.6	532.7	K17505	P:GO:0006470; F:GO:0003824; F:GO:0004722	P:protein dephosphorylation; F:catalytic activity; F:protein serine/threonine phosphatase activity	IPR036457 (G3DSA:3.60.40.GENE3D); IPR001932 (PFAM); PTHR13832:SF549 (PANTHER); IPR015655 (PANTHER); IPR001932 (PROSITE_PROFILES); IPR001932 (CDD); IPR036457 (SUPERFAMILY)	protein phosphatase 1K, mitochondrial-like	P:GO:0006470; F:GO:0004722; F:GO:0046872	P:protein dephosphorylation; F:protein serine/threonine phosphatase activity; F:metal ion binding
Cnem001173-RA	539	XP_005098419.2	54.8	555.4	A0A2C9LNH0	50.4	539.3	K24173	F:GO:0005515	F:protein binding	IPR000555 (PFAM); IPR040843 (PFAM); G3DSA:3.40.140.10 (GENE3D); mobidb-lite (MOBIDB_LITE); mobidb-lite (MOBIDB_LITE); mobidb-lite (MOBIDB_LITE); mobidb-lite (MOBIDB_LITE); PTHR12802:SF46 (PANTHER); PTHR12802 (PANTHER); PTHR12802:SF46 (PANTHER); PTHR12802 (PANTHER); IPR037518 (PROSITE_PROFILES); cd08067 (CDD); SSF102712 (SUPERFAMILY)	MPN domain-containing protein-like	no GO terms	no GO terms
Cnem001174-RA	347	XP_005095648.2	29.6	115.2	A0A2T7PZQ4	31.1	74.7	no hit	no GO terms	no GO terms	mobidb-lite (MOBIDB_LITE)	PREDICTED: uncharacterized protein LOC101851183	no GO terms	no GO terms
Cnem001199-RA	297	XP_012935094.1	75.6	477.6	A0A433UBE3	73.9	461.1	K01081	F:GO:0000287; F:GO:0008253; C:GO:0005737	F:magnesium ion binding; F:5'-nucleotidase activity; C:cytoplasm	G3DSA:1.10.150.340 (GENE3D); IPR023214 (G3DSA:3.40.50.GENE3D); IPR006434 (TIGRFAM); IPR006434 (PFAM); IPR006434 (PANTHER); IPR036412 (SUPERFAMILY)	7-methylguanosine phosphate-specific 5'-nucleotidase A-like isoform X6	no GO terms	no GO terms
Cnem001203-RA	645	XP_005100251.1	54.2	116.7	W4XD74	48.1	60.1	no hit	F:GO:0003676; F:GO:0004523	F:nucleic acid binding; F:RNA-DNA hybrid ribonuclease activity	IPR000477 (PFAM); IPR036397 (G3DSA:3.30.420.GENE3D); IPR002156 (PFAM); mobidb-lite (MOBIDB_LITE); mobidb-lite (MOBIDB_LITE); mobidb-lite (MOBIDB_LITE); PTHR33332 (PANTHER); PTHR33332:SF6 (PANTHER); IPR000477 (PROSITE_PROFILES); IPR002156 (PROSITE_PROFILES); IPR012337 (SUPERFAMILY)	hypothetical protein EGW08_003526	P:GO:0090502; F:GO:0003676; F:GO:0004523	P:RNA phosphodiester bond hydrolysis, endonucleolytic; F:nucleic acid binding; F:RNA-DNA hybrid ribonuclease activity
Cnem001204-RA	322	no hit	no hit	no hit	no hit	no hit	no hit	no hit	no GO terms	no GO terms	PTHR23304:SF165 (PANTHER); PTHR23304:SF165 (PANTHER); PTHR23304 (PANTHER)	unnamed protein product, partial	no GO terms	no GO terms
Cnem001207-RA	97	RUS75770.1	96.9	104.8	A0A3S1B605	96.9	104.8	K09481	P:GO:0006886; C:GO:0005784	P:intracellular protein transport; C:Sec61 translocon complex	IPR016482 (PFAM); mobidb-lite (MOBIDB_LITE); mobidb-lite (MOBIDB_LITE); PTHR13509:SF3 (PANTHER); IPR030671 (PANTHER)	protein transport protein Sec61 subunit beta-like	P:GO:0006886; C:GO:0005784; C:GO:0016021	P:intracellular protein transport; C:Sec61 translocon complex; C:integral component of membrane
Cnem001208-RA	217	XP_005099976.1;XP_005099977.1	77.4	254.6	A0A433SPP0	75.4	241.5	K08334	P:GO:0006897; P:GO:0006914; P:GO:0032465	P:endocytosis; P:autophagy; P:regulation of cytokinesis	IPR041691 (PFAM); IPR038274 (G3DSA:1.10.418.GENE3D); IPR007243 (PANTHER); IPR032913 (PTHR12768:PANTHER)	hypothetical protein EGW08_021019	P:GO:0006897; P:GO:0006914; P:GO:0032465	P:endocytosis; P:autophagy; P:regulation of cytokinesis
Cnem001211-RA	861	XP_005103639.1;XP_005103640.1	38.9	444.1	A0A2C9LN52	38.9	344.4	no hit	F:GO:0005515	F:protein binding	G3DSA:3.30.60.180 (GENE3D); G3DSA:2.170.270.10 (GENE3D); IPR001214 (PFAM); IPR002893 (PFAM); mobidb-lite (MOBIDB_LITE); mobidb-lite (MOBIDB_LITE); mobidb-lite (MOBIDB_LITE); PTHR46402:SF2 (PANTHER); PTHR46402 (PANTHER); IPR002893 (PROSITE_PROFILES); IPR001214 (PROSITE_PROFILES); SSF144232 (SUPERFAMILY); SSF82199 (SUPERFAMILY)	PREDICTED: uncharacterized protein LOC101862288 isoform X3	no GO terms	no GO terms
Cnem001214-RA	357	no hit	no hit	no hit	no hit	no hit	no hit	no hit	no GO terms	no GO terms	mobidb-lite (MOBIDB_LITE); mobidb-lite (MOBIDB_LITE); mobidb-lite (MOBIDB_LITE); mobidb-lite (MOBIDB_LITE); mobidb-lite (MOBIDB_LITE)	---NA---	no GO terms	no GO terms
Cnem001222-RA	291	no hit	no hit	no hit	no hit	no hit	no hit	no hit	no IPS match	no IPS match	no IPS match	---NA---	no GO terms	no GO terms
Cnem001237-RA	306	GCF43541.1	37.2	188.0	A0A3Q1LXQ5	37.0	188.3	no hit	no GO terms	no GO terms	IPR000477 (PFAM); PTHR47027 (PANTHER); PTHR47027:SF6 (PANTHER); IPR000477 (PROSITE_PROFILES); IPR043502 (SUPERFAMILY)	hypothetical protein parPi_0004508	no GO terms	no GO terms
Cnem001240-RA	864	XP_013060898.1	50.6	423.3	A0A2C9K443	50.6	423.3	K09113	F:GO:0046983	F:protein dimerization activity	IPR036638 (G3DSA:4.10.280.GENE3D); IPR011598 (PFAM); mobidb-lite (MOBIDB_LITE); mobidb-lite (MOBIDB_LITE); mobidb-lite (MOBIDB_LITE); mobidb-lite (MOBIDB_LITE); mobidb-lite (MOBIDB_LITE); PTHR15741:SF14 (PANTHER); PTHR15741 (PANTHER); IPR011598 (PROSITE_PROFILES); IPR011598 (CDD); IPR036638 (SUPERFAMILY)	MLX-interacting protein-like	P:GO:0006355; P:GO:0006357; F:GO:0000981; F:GO:0046983	P:regulation of transcription, DNA-templated; P:regulation of transcription by RNA polymerase II; F:DNA-binding transcription factor activity, RNA polymerase II-specific; F:protein dimerization activity
Cnem001242-RA	136	no hit	no hit	no hit	no hit	no hit	no hit	no hit	no IPS match	no IPS match	no IPS match	---NA---	no GO terms	no GO terms
Cnem001244-RA	288	RZF44527.1	46.8	96.7	A0A3P8SR08	48.5	127.5	no hit	no GO terms	no GO terms	IPR000477 (PFAM); mobidb-lite (MOBIDB_LITE); mobidb-lite (MOBIDB_LITE); mobidb-lite (MOBIDB_LITE); PTHR47027 (PANTHER); IPR000477 (PROSITE_PROFILES); IPR016024 (SUPERFAMILY)	putative uncharacterized transposon-derived protein F52C9.6	no GO terms	no GO terms
Cnem001249-RA	969	XP_013063375.1	39.8	452.2	A0A2C9LM98	38.9	448.0	no hit	F:GO:0005515	F:protein binding	G3DSA:3.40.50.300 (GENE3D); IPR011990 (G3DSA:1.25.40.GENE3D); mobidb-lite (MOBIDB_LITE); mobidb-lite (MOBIDB_LITE); mobidb-lite (MOBIDB_LITE); mobidb-lite (MOBIDB_LITE); IPR011990 (SUPERFAMILY)	PREDICTED: uncharacterized protein LOC106052525 isoform X3	no GO terms	no GO terms
Cnem001250-RA	1034	XP_005091552.1	84.6	1622.1	A0A3S1HDS1	87.1	1618.2	K10408	no GO terms	no GO terms	IPR024317 (PFAM); G3DSA:1.20.920.30 (GENE3D); PF12775 (PFAM); IPR041589 (PFAM); G3DSA:3.40.50.300 (GENE3D); IPR024743 (PFAM); G3DSA:1.20.920.20 (GENE3D); PTHR45703 (PANTHER); PTHR45703:SF3 (PANTHER); cd00009 (CDD); IPR027417 (SUPERFAMILY); IPR027417 (SUPERFAMILY)	dynein heavy chain 10, axonemal-like	no GO terms	no GO terms
Cnem001252-RA	522	XP_005091552.1	96.7	1033.5	A0A2C9JWZ0	95.4	1023.8	K10413	P:GO:0007018; F:GO:0003777; F:GO:0005524	P:microtubule-based movement; F:microtubule motor activity; F:ATP binding	IPR035699 (PFAM); G3DSA:3.40.50.300 (GENE3D); G3DSA:3.40.50.300 (GENE3D); G3DSA:1.20.58.1120 (GENE3D); IPR043157 (G3DSA:1.10.8.GENE3D); PTHR10676:SF378 (PANTHER); IPR026983 (PANTHER); IPR027417 (SUPERFAMILY); IPR027417 (SUPERFAMILY)	dynein heavy chain 10, axonemal-like	no GO terms	no GO terms
Cnem001267-RA	806	XP_005107497.1	63.7	730.3	A0A3S1BJ39	57.6	680.6	K12480	P:GO:0006897; F:GO:0005096; F:GO:0008083; F:GO:0046872	P:endocytosis; F:GTPase activator activity; F:growth factor activity; F:metal ion binding	IPR003914 (PRINTS); IPR000306 (PFAM); IPR018514 (PFAM); G3DSA:1.20.5.730 (GENE3D); IPR015390 (PFAM); IPR013083 (G3DSA:3.30.40.GENE3D); mobidb-lite (MOBIDB_LITE); mobidb-lite (MOBIDB_LITE); mobidb-lite (MOBIDB_LITE); mobidb-lite (MOBIDB_LITE); IPR003914 (PANTHER); PTHR31179:SF7 (PANTHER); IPR017455 (PROSITE_PROFILES); cd15739 (CDD); IPR011011 (SUPERFAMILY); SSF103652 (SUPERFAMILY)	rab GTPase-binding effector protein 1-like isoform X2	no GO terms	no GO terms
Cnem001269-RA	169	XP_005107499.1	56.6	142.1	V4C831	47.0	105.5	no hit	P:GO:0006897; F:GO:0005096; F:GO:0008083	P:endocytosis; F:GTPase activator activity; F:growth factor activity	IPR018514 (PFAM); mobidb-lite (MOBIDB_LITE); IPR003914 (PANTHER)	rab GTPase-binding effector protein 1-like isoform X3	no GO terms	no GO terms
Cnem001271-RA	1351	XP_025085055.1	49.3	989.2	A0A3S1B9P2	47.8	827.8	no hit	no GO terms	no GO terms	PF13912 (PFAM); IPR013087 (PFAM); G3DSA:3.30.160.60 (GENE3D); mobidb-lite (MOBIDB_LITE); mobidb-lite (MOBIDB_LITE); mobidb-lite (MOBIDB_LITE); mobidb-lite (MOBIDB_LITE); PTHR31511 (PANTHER); PTHR31511:SF12 (PANTHER); IPR013087 (PROSITE_PROFILES); IPR013087 (PROSITE_PROFILES); IPR043502 (SUPERFAMILY); IPR036236 (SUPERFAMILY)	uncharacterized protein LOC112558684 isoform X2	no GO terms	no GO terms
Cnem001276-RA	273	XP_005089382.2	47.0	228.0	A0A2C9L5T2	45.0	201.4	no hit	no GO terms	no GO terms	IPR001828 (PFAM); G3DSA:3.40.50.2300 (GENE3D); PTHR24060 (PANTHER); IPR028082 (SUPERFAMILY)	metabotropic glutamate receptor 2-like isoform X1	no GO terms	no GO terms
Cnem001277-RA	382	PVD36795.1	46.1	146.7	A0A2T7PTP3	46.1	146.7	no hit	no GO terms	no GO terms	IPR000477 (PFAM); IPR005135 (PFAM); IPR036691 (G3DSA:3.60.10.GENE3D); PTHR19446 (PANTHER); PTHR19446:SF427 (PANTHER); IPR000477 (PROSITE_PROFILES); IPR043502 (SUPERFAMILY); IPR036691 (SUPERFAMILY)	hypothetical protein C0Q70_03785	no GO terms	no GO terms
Cnem001286-RA	217	XP_005089375.2	82.2	359.8	A0A2C9JWZ5	81.6	355.1	K13024	F:GO:0000829	F:inositol heptakisphosphate kinase activity	G3DSA:3.30.470.100 (GENE3D); IPR013651 (PFAM); PTHR12750:SF11 (PANTHER); IPR037446 (PANTHER); SSF56059 (SUPERFAMILY)	inositol hexakisphosphate and diphosphoinositol-pentakisphosphate kinase 2-like	no GO terms	no GO terms
Cnem001292-RA	352	RUS85734.1	54.2	374.0	A0A3S1C8A1	54.2	374.0	no hit	no IPS match	no IPS match	no IPS match	hypothetical protein EGW08_006528	C:GO:0016021	C:integral component of membrane
Cnem001293-RA	916	RUS70316.1	90.9	1557.3	A0A433SMC9	90.9	1557.3	K12392	P:GO:0006886; P:GO:0015031; P:GO:0016192; F:GO:0030276; C:GO:0030117; C:GO:0030131	P:intracellular protein transport; P:protein transport; P:vesicle-mediated transport; F:clathrin binding; C:membrane coat; C:clathrin adaptor complex	IPR016342 (PIRSF); IPR011989 (G3DSA:1.25.10.GENE3D); IPR002553 (PFAM); IPR015151 (PFAM); IPR013037 (G3DSA:2.60.40.GENE3D); IPR008152 (PFAM); IPR012295 (G3DSA:3.30.310.GENE3D); mobidb-lite (MOBIDB_LITE); mobidb-lite (MOBIDB_LITE); mobidb-lite (MOBIDB_LITE); PTHR11134:SF31 (PANTHER); IPR026739 (PANTHER); IPR016024 (SUPERFAMILY); IPR009028 (SUPERFAMILY); IPR013041 (SUPERFAMILY)	hypothetical protein EGW08_021922	P:GO:0006886; P:GO:0016192; F:GO:0030276; C:GO:0030131	P:intracellular protein transport; P:vesicle-mediated transport; F:clathrin binding; C:clathrin adaptor complex
Cnem001296-RA	238	XP_033625676.1	43.5	149.1	H2YWZ5	36.6	146.4	no hit	no GO terms	no GO terms	PTHR19446 (PANTHER); PTHR19446:SF427 (PANTHER)	uncharacterized protein LOC117288912	no GO terms	no GO terms
Cnem001297-RA	758	XP_005107183.1;XP_012942798.1	62.4	547.7	A0A433SMD1	50.2	386.3	no hit	F:GO:0005515	F:protein binding	IPR003892 (PFAM); G3DSA:1.10.8.10 (GENE3D); mobidb-lite (MOBIDB_LITE); mobidb-lite (MOBIDB_LITE); mobidb-lite (MOBIDB_LITE); mobidb-lite (MOBIDB_LITE); mobidb-lite (MOBIDB_LITE); mobidb-lite (MOBIDB_LITE); mobidb-lite (MOBIDB_LITE); mobidb-lite (MOBIDB_LITE); mobidb-lite (MOBIDB_LITE); mobidb-lite (MOBIDB_LITE); mobidb-lite (MOBIDB_LITE); mobidb-lite (MOBIDB_LITE); IPR040192 (PANTHER); IPR003892 …	PREDICTED: uncharacterized protein LOC101847139	no GO terms	no GO terms
Cnem001298-RA	254	XP_013078423.1	70.1	308.1	A0A2C9LSQ7	70.1	308.1	K01014	F:GO:0008146	F:sulfotransferase activity	IPR000863 (PFAM); G3DSA:3.40.50.300 (GENE3D); PTHR11783 (PANTHER); IPR027417 (SUPERFAMILY)	sulfotransferase 1A3-like	F:GO:0008146	F:sulfotransferase activity
Cnem001305-RA	122	XP_018405731.1;KYM93428.1	77.6	104.4	A0A195BZU0	77.6	104.4	K05619	no GO terms	no GO terms	IPR036985 (G3DSA:3.90.260.GENE3D); mobidb-lite (MOBIDB_LITE); PTHR11590 (PANTHER); PTHR11590:SF40 (PANTHER); IPR038765 (SUPERFAMILY)	protein-glutamine gamma-glutamyltransferase 4-like	no GO terms	no GO terms
Cnem001310-RA	475	GCF43541.1	43.0	226.1	A0A402EH83	43.0	226.1	no hit	no GO terms	no GO terms	Coil (COILS); G3DSA:1.20.1740.10 (GENE3D); IPR000477 (PFAM); PTHR47027:SF6 (PANTHER); PTHR47027 (PANTHER); CYTOPLASMIC_DOMAIN (PHOBIUS); NON_CYTOPLASMIC_DOMAIN (PHOBIUS); TRANSMEMBRANE (PHOBIUS); IPR043502 (SUPERFAMILY); TMhelix (TMHMM)	hypothetical protein parPi_0002963	no GO terms	no GO terms
Cnem001317-RA	1602	XP_025085055.1	50.1	1310.8	A0A3S1B9P2	45.4	1063.5	no hit	no GO terms	no GO terms	mobidb-lite (MOBIDB_LITE); mobidb-lite (MOBIDB_LITE); mobidb-lite (MOBIDB_LITE); mobidb-lite (MOBIDB_LITE); mobidb-lite (MOBIDB_LITE); PTHR31511 (PANTHER); PTHR31511:SF12 (PANTHER); IPR043502 (SUPERFAMILY)	uncharacterized protein LOC112558684 isoform X2	no GO terms	no GO terms
Cnem001318-RA	528	PIK43826.1	46.2	479.6	A0A2G8K724	46.2	479.6	no hit	P:GO:0015074; F:GO:0003676	P:DNA integration; F:nucleic acid binding	IPR001584 (PFAM); IPR036397 (G3DSA:3.30.420.GENE3D); PTHR46585 (PANTHER); IPR001584 (PROSITE_PROFILES); IPR012337 (SUPERFAMILY)	hypothetical protein BSL78_19311	P:GO:0015074; F:GO:0003676	P:DNA integration; F:nucleic acid binding
Cnem001319-RA	193	XP_005090334.1	43.3	82.4	A0A2C9KF61	68.5	76.3	no hit	no GO terms	no GO terms	Coil (COILS); mobidb-lite (MOBIDB_LITE); mobidb-lite (MOBIDB_LITE); mobidb-lite (MOBIDB_LITE)	targeting protein for Xklp2-like isoform X3	no GO terms	no GO terms
Cnem001320-RA	479	XP_005090333.1	58.4	506.9	A0A3S1A1N1	51.5	414.5	K16812	P:GO:0032147; P:GO:0060236; C:GO:0005819; C:GO:0005874	P:activation of protein kinase activity; P:regulation of mitotic spindle organization; C:spindle; C:microtubule	Coil (COILS); Coil (COILS); IPR027330 (PFAM); IPR027329 (PFAM); mobidb-lite (MOBIDB_LITE); mobidb-lite (MOBIDB_LITE); mobidb-lite (MOBIDB_LITE); mobidb-lite (MOBIDB_LITE); PTHR14326:SF9 (PANTHER); IPR009675 (PANTHER)	targeting protein for Xklp2-like isoform X2	no GO terms	no GO terms
Cnem001322-RA	827	XP_005090389.1	40.2	476.5	A0A0L8HM24	47.8	358.2	no hit	no GO terms	no GO terms	IPR013087 (SMART); G3DSA:3.30.160.60 (GENE3D); G3DSA:3.30.160.60 (GENE3D); G3DSA:3.30.160.60 (GENE3D); G3DSA:3.30.160.60 (GENE3D); IPR013087 (PFAM); PF13909 (PFAM); G3DSA:3.30.160.60 (GENE3D); G3DSA:3.30.160.60 (GENE3D); mobidb-lite (MOBIDB_LITE); mobidb-lite (MOBIDB_LITE); mobidb-lite (MOBIDB_LITE); PTHR24399 (PANTHER); IPR013087 (PROSITE_PATTERNS); IPR013087 (PROSITE_PATTERNS); IPR013087 (PROSI…	PREDICTED: uncharacterized protein LOC101850925	no GO terms	no GO terms
Cnem001324-RA	500	XP_012940969.1	57.3	498.0	A0A2C9JSD5	56.2	484.6	no hit	P:GO:0055114; F:GO:0004499; F:GO:0050660; F:GO:0050661	P:oxidation-reduction process; F:N,N-dimethylaniline monooxygenase activity; F:flavin adenine dinucleotide binding; F:NADP binding	IPR000960 (PRINTS); IPR036188 (G3DSA:3.50.50.GENE3D); IPR020946 (PFAM); IPR036188 (G3DSA:3.50.50.GENE3D); PTHR23023:SF209 (PANTHER); PTHR23023 (PANTHER); IPR036188 (SUPERFAMILY); IPR036188 (SUPERFAMILY)	flavin-containing monooxygenase FMO GS-OX-like 2 isoform X2	no GO terms	no GO terms
Cnem001325-RA	216	RUS86641.1	74.3	296.6	A0A433TYK3	74.3	296.6	K12194	P:GO:0007034	P:vacuolar transport	Coil (COILS); Coil (COILS); IPR005024 (PFAM); G3DSA:1.10.287.1060 (GENE3D); mobidb-lite (MOBIDB_LITE); PTHR22761:SF4 (PANTHER); PTHR22761 (PANTHER)	hypothetical protein LOTGIDRAFT_203722	P:GO:0007034	P:vacuolar transport
Cnem001327-RA	239	no hit	no hit	no hit	A0A433SUN7	41.4	60.5	no hit	no GO terms	no GO terms	CYTOPLASMIC_DOMAIN (PHOBIUS); TRANSMEMBRANE (PHOBIUS); NON_CYTOPLASMIC_DOMAIN (PHOBIUS); TRANSMEMBRANE (PHOBIUS); CYTOPLASMIC_DOMAIN (PHOBIUS)	hypothetical protein EGW08_018810	no GO terms	no GO terms
Cnem001330-RA	305	XP_013091734.1	49.7	178.7	A0A2C9KGK9	49.7	178.7	no hit	no GO terms	no GO terms	IPR008166 (PFAM); mobidb-lite (MOBIDB_LITE); PTHR21461:SF0 (PANTHER); PTHR21461 (PANTHER)	PREDICTED: uncharacterized protein LOC106065515	F:GO:0016740	F:transferase activity
Cnem001333-RA	312	KAF0303248.1	29.4	137.5	A0A162ED23	22.8	60.1	no hit	F:GO:0003676; F:GO:0004523	F:nucleic acid binding; F:RNA-DNA hybrid ribonuclease activity	IPR002156 (PFAM); IPR036397 (G3DSA:3.30.420.GENE3D); SIGNAL_PEPTIDE_N_REGION (PHOBIUS); SIGNAL_PEPTIDE_C_REGION (PHOBIUS); NON_CYTOPLASMIC_DOMAIN (PHOBIUS); SIGNAL_PEPTIDE (PHOBIUS); SIGNAL_PEPTIDE_H_REGION (PHOBIUS); IPR002156 (PROSITE_PROFILES); IPR012337 (SUPERFAMILY)	hypothetical protein EGW08_003526	P:GO:0090502; F:GO:0003676; F:GO:0004523	P:RNA phosphodiester bond hydrolysis, endonucleolytic; F:nucleic acid binding; F:RNA-DNA hybrid ribonuclease activity
Cnem001336-RA	297	PVD21563.1	30.2	152.1	A0A2T7NK70	30.2	152.1	no hit	no IPS match	no IPS match	no IPS match	hypothetical protein C0Q70_17361	no GO terms	no GO terms
Cnem001343-RA	356	XP_013096096.1	37.5	206.5	A0A2C9KS02	37.5	206.5	no hit	no GO terms	no GO terms	IPR008166 (PFAM); PTHR21461:SF0 (PANTHER); PTHR21461 (PANTHER)	PREDICTED: uncharacterized protein LOC106079474	F:GO:0016740; F:GO:0016757	F:transferase activity; F:transferase activity, transferring glycosyl groups
Cnem001346-RA	165	XP_005106134.1;XP_012942293.1;XP_012942294.1	54.9	181.0	A0A2C9LFK6	52.0	175.3	no hit	no IPS match	no IPS match	no IPS match	PREDICTED: uncharacterized protein LOC101863927	no GO terms	no GO terms
Cnem001347-RA	388	XP_013091734.1	38.3	222.6	A0A2C9KGK9	38.3	222.6	no hit	no GO terms	no GO terms	IPR008166 (PFAM); mobidb-lite (MOBIDB_LITE); mobidb-lite (MOBIDB_LITE); PTHR21461:SF40 (PANTHER); PTHR21461 (PANTHER); IPR016024 (SUPERFAMILY)	PREDICTED: uncharacterized protein LOC106079474	F:GO:0016740; F:GO:0016757	F:transferase activity; F:transferase activity, transferring glycosyl groups
Cnem001355-RA	381	XP_005107241.2	90.0	711.8	A0A2C9JRD8	88.2	706.4	no hit	F:GO:0005515	F:protein binding	SM00212 (SMART); IPR001810 (SMART); IPR001810 (PFAM); G3DSA:1.20.1280.50 (GENE3D); IPR016135 (G3DSA:3.10.110.GENE3D); IPR000608 (PFAM); mobidb-lite (MOBIDB_LITE); mobidb-lite (MOBIDB_LITE); PTHR24068:SF29 (PANTHER); PTHR24068 (PANTHER); IPR000608 (PROSITE_PROFILES); IPR001810 (PROSITE_PROFILES); IPR000608 (CDD); IPR036047 (SUPERFAMILY); IPR016135 (SUPERFAMILY)	PREDICTED: uncharacterized protein LOC101861609	no GO terms	no GO terms
Cnem001361-RA	168	RUS73853.1	74.3	218.8	A0A3S1BSF8	74.3	218.8	K15280	no GO terms	no GO terms	IPR004853 (PFAM); PTHR11132 (PANTHER); PTHR11132:SF238 (PANTHER); NON_CYTOPLASMIC_DOMAIN (PHOBIUS); CYTOPLASMIC_DOMAIN (PHOBIUS); TRANSMEMBRANE (PHOBIUS); TRANSMEMBRANE (PHOBIUS); TRANSMEMBRANE (PHOBIUS); CYTOPLASMIC_DOMAIN (PHOBIUS); NON_CYTOPLASMIC_DOMAIN (PHOBIUS); TRANSMEMBRANE (PHOBIUS); CYTOPLASMIC_DOMAIN (PHOBIUS); TMhelix (TMHMM); TMhelix (TMHMM); TMhelix (TMHMM); TMhelix (TMHMM)	solute carrier family 35 member C2-like	no GO terms	no GO terms
Cnem001365-RA	848	GCF41464.1	32.3	450.3	A0A402EBC2	32.3	450.3	no hit	no GO terms	no GO terms	Coil (COILS); IPR005135 (PFAM); IPR000477 (PFAM); IPR036691 (G3DSA:3.60.10.GENE3D); mobidb-lite (MOBIDB_LITE); mobidb-lite (MOBIDB_LITE); mobidb-lite (MOBIDB_LITE); PTHR47027:SF6 (PANTHER); PTHR47027 (PANTHER); TRANSMEMBRANE (PHOBIUS); TRANSMEMBRANE (PHOBIUS); CYTOPLASMIC_DOMAIN (PHOBIUS); NON_CYTOPLASMIC_DOMAIN (PHOBIUS); CYTOPLASMIC_DOMAIN (PHOBIUS); IPR000477 (PROSITE_PROFILES); cd09076 (CDD);…	craniofacial development protein 2-like	no GO terms	no GO terms
Cnem001368-RA	391	XP_013096096.1	40.3	222.6	A0A2C9KS02	40.3	222.6	no hit	no GO terms	no GO terms	IPR008166 (PFAM); PTHR21461:SF40 (PANTHER); PTHR21461 (PANTHER); TRANSMEMBRANE (PHOBIUS); NON_CYTOPLASMIC_DOMAIN (PHOBIUS); CYTOPLASMIC_DOMAIN (PHOBIUS); TMhelix (TMHMM)	PREDICTED: uncharacterized protein LOC106079474	F:GO:0016740; F:GO:0016757	F:transferase activity; F:transferase activity, transferring glycosyl groups
Cnem001369-RA	715	RUS85319.1	41.3	506.1	A0A3S1BCT8	41.3	506.1	no hit	F:GO:0003676; F:GO:0004523	F:nucleic acid binding; F:RNA-DNA hybrid ribonuclease activity	IPR000477 (PFAM); IPR002156 (PFAM); IPR036397 (G3DSA:3.30.420.GENE3D); PTHR19446 (PANTHER); PTHR19446:SF427 (PANTHER); IPR000477 (PROSITE_PROFILES); IPR002156 (PROSITE_PROFILES); cd01650 (CDD); cd09276 (CDD); IPR012337 (SUPERFAMILY)	hypothetical protein	no GO terms	no GO terms
Cnem001371-RA	299	no hit	no hit	no hit	no hit	no hit	no hit	no hit	no GO terms	no GO terms	Coil (COILS); mobidb-lite (MOBIDB_LITE); mobidb-lite (MOBIDB_LITE); TRANSMEMBRANE (PHOBIUS); CYTOPLASMIC_DOMAIN (PHOBIUS); NON_CYTOPLASMIC_DOMAIN (PHOBIUS); CYTOPLASMIC_DOMAIN (PHOBIUS); TRANSMEMBRANE (PHOBIUS); NON_CYTOPLASMIC_DOMAIN (PHOBIUS); TRANSMEMBRANE (PHOBIUS); TMhelix (TMHMM); TMhelix (TMHMM); TMhelix (TMHMM)	hypothetical protein, partial	no GO terms	no GO terms
Cnem001373-RA	795	XP_033962656.1	55.2	929.5	H9GQ93	53.2	914.8	no hit	no GO terms	no GO terms	IPR013087 (SMART); G3DSA:3.30.160.60 (GENE3D); IPR013087 (PFAM); G3DSA:3.30.160.60 (GENE3D); G3DSA:3.30.160.60 (GENE3D); G3DSA:3.30.160.60 (GENE3D); G3DSA:3.30.160.60 (GENE3D); PF13912 (PFAM); G3DSA:3.30.160.60 (GENE3D); G3DSA:3.30.160.60 (GENE3D); PTHR24393 (PANTHER); PTHR24393:SF80 (PANTHER); PTHR24393 (PANTHER); PTHR24393:SF80 (PANTHER); PTHR24393 (PANTHER); PTHR24393 (PANTHER); PTHR24393 (PAN…	zinc finger protein 208-like	no GO terms	no GO terms
Cnem001381-RA	241	XP_013094678.1	48.1	80.9	A0A2C9LFK0	48.1	80.9	no hit	no IPS match	no IPS match	no IPS match	PREDICTED: atherin-like	no GO terms	no GO terms
Cnem001383-RA	138	RUS69349.1	93.0	184.9	A0A3S0Z2I8	93.0	184.9	K11087	P:GO:0000387; P:GO:0006396	P:spliceosomal snRNP assembly; P:RNA processing	IPR001163 (SMART); G3DSA:2.30.30.100 (GENE3D); IPR001163 (PFAM); mobidb-lite (MOBIDB_LITE); mobidb-lite (MOBIDB_LITE); IPR027141 (PANTHER); PTHR23338:SF32 (PANTHER); IPR034102 (CDD); IPR010920 (SUPERFAMILY)	hypothetical protein EGW08_022887	P:GO:0000387; C:GO:0005634	P:spliceosomal snRNP assembly; C:nucleus
Cnem001385-RA	947	OOZ58401.1	46.7	887.5	W4YDL7	33.6	500.4	no hit	P:GO:0015074; F:GO:0003676	P:DNA integration; F:nucleic acid binding	Coil (COILS); Coil (COILS); G3DSA:3.10.20.370 (GENE3D); IPR000477 (PFAM); IPR041373 (PFAM); IPR001584 (PFAM); G3DSA:1.10.340.70 (GENE3D); IPR041588 (PFAM); IPR043128 (G3DSA:3.30.70.GENE3D); IPR036397 (G3DSA:3.30.420.GENE3D); IPR043128 (G3DSA:3.30.70.GENE3D); G3DSA:3.10.10.10 (GENE3D); PTHR24559 (PANTHER); PTHR24559 (PANTHER); PTHR24559:SF269 (PANTHER); PTHR24559:SF269 (PANTHER); IPR001584 (PROSIT…	DDE-type integrase/transposase/recombinase	no GO terms	no GO terms
Cnem001386-RA	241	RUS91759.1	34.7	138.3	A0A433UD90	34.7	138.3	no hit	F:GO:0003676	F:nucleic acid binding	IPR036397 (G3DSA:3.30.420.GENE3D); PTHR33332:SF6 (PANTHER); PTHR33332 (PANTHER); IPR000477 (PROSITE_PROFILES)	hypothetical protein	no GO terms	no GO terms
Cnem001387-RA	155	KAF2343190.1	53.6	141.4	A0A0L8FTS6	54.3	125.2	no hit	no GO terms	no GO terms	IPR026630 (PANTHER); PTHR45913:SF6 (PANTHER)	HAT C-terminal dimerization domain	no GO terms	no GO terms
Cnem001399-RA	274	XP_005098443.2	45.8	242.7	A0A2C9JQC7	46.2	227.6	K15266	P:GO:0000154; F:GO:0000179; F:GO:0008649	P:rRNA modification; F:rRNA (adenine-N6,N6-)-dimethyltransferase activity; F:rRNA methyltransferase activity	IPR020598 (SMART); IPR001737 (PFAM); G3DSA:3.40.50.150 (GENE3D); PTHR11727:SF17 (PANTHER); IPR001737 (PANTHER); IPR020596 (PROSITE_PATTERNS); IPR001737 (PROSITE_PROFILES); IPR029063 (SUPERFAMILY); IPR029063 (SUPERFAMILY)	mitochondrial dimethyladenosine transferase 1-like	no GO terms	no GO terms
Cnem001405-RA	630	XP_012944616.1	62.1	353.6	A0A3S1A2E1	59.2	347.1	K08855	P:GO:0006468; F:GO:0003676; F:GO:0004523; F:GO:0004672; F:GO:0005524	P:protein phosphorylation; F:nucleic acid binding; F:RNA-DNA hybrid ribonuclease activity; F:protein kinase activity; F:ATP binding	IPR000719 (SMART); G3DSA:3.30.200.20 (GENE3D); IPR036397 (G3DSA:3.30.420.GENE3D); IPR002156 (PFAM); IPR000719 (PFAM); G3DSA:1.10.510.10 (GENE3D); PTHR22967:SF57 (PANTHER); PTHR22967:SF57 (PANTHER); PTHR22967 (PANTHER); PTHR22967 (PANTHER); PTHR22967 (PANTHER); PTHR22967:SF57 (PANTHER); IPR000719 (PROSITE_PROFILES); IPR002156 (PROSITE_PROFILES); IPR011009 (SUPERFAMILY); IPR012337 (SUPERFAMILY)	cyclin-G-associated kinase-like	no GO terms	no GO terms
Cnem001406-RA	574	RUS88711.1	39.1	378.3	A0A433U4I6	39.1	378.3	no hit	F:GO:0003676; F:GO:0004523	F:nucleic acid binding; F:RNA-DNA hybrid ribonuclease activity	IPR036397 (G3DSA:3.30.420.GENE3D); IPR000477 (PFAM); IPR002156 (PFAM); mobidb-lite (MOBIDB_LITE); PTHR33332 (PANTHER); PTHR33332:SF6 (PANTHER); SIGNAL_PEPTIDE_N_REGION (PHOBIUS); NON_CYTOPLASMIC_DOMAIN (PHOBIUS); SIGNAL_PEPTIDE (PHOBIUS); SIGNAL_PEPTIDE_H_REGION (PHOBIUS); CYTOPLASMIC_DOMAIN (PHOBIUS); TRANSMEMBRANE (PHOBIUS); SIGNAL_PEPTIDE_C_REGION (PHOBIUS); IPR000477 (PROSITE_PROFILES); IPR00…	hypothetical protein EGW08_003526	P:GO:0090502; F:GO:0003676; F:GO:0004523	P:RNA phosphodiester bond hydrolysis, endonucleolytic; F:nucleic acid binding; F:RNA-DNA hybrid ribonuclease activity
Cnem001413-RA	731	GCF48631.1	44.4	586.3	A0A402EWP9	44.4	586.3	no hit	no GO terms	no GO terms	IPR036691 (G3DSA:3.60.10.GENE3D); IPR000477 (PFAM); IPR005135 (PFAM); mobidb-lite (MOBIDB_LITE); mobidb-lite (MOBIDB_LITE); mobidb-lite (MOBIDB_LITE); PTHR19446 (PANTHER); PTHR19446:SF427 (PANTHER); IPR000477 (PROSITE_PROFILES); cd09076 (CDD); cd01650 (CDD); IPR036691 (SUPERFAMILY); IPR043502 (SUPERFAMILY)	hypothetical protein M6C051_2646	no GO terms	no GO terms
Cnem001422-RA	213	no hit	no hit	no hit	no hit	no hit	no hit	no hit	no GO terms	no GO terms	TRANSMEMBRANE (PHOBIUS); TRANSMEMBRANE (PHOBIUS); NON_CYTOPLASMIC_DOMAIN (PHOBIUS); CYTOPLASMIC_DOMAIN (PHOBIUS); CYTOPLASMIC_DOMAIN (PHOBIUS); CYTOPLASMIC_DOMAIN (PHOBIUS); NON_CYTOPLASMIC_DOMAIN (PHOBIUS); TRANSMEMBRANE (PHOBIUS); TRANSMEMBRANE (PHOBIUS); TMhelix (TMHMM)	---NA---	no GO terms	no GO terms
Cnem001423-RA	332	GCF48632.1	28.1	111.3	H2YWZ5	32.5	127.9	no hit	no IPS match	no IPS match	no IPS match	hypothetical protein C0J52_01962	no GO terms	no GO terms
Cnem001428-RA	710	RUS88711.1	45.2	456.4	A0A433U4I6	45.2	456.4	no hit	F:GO:0003676; F:GO:0004523	F:nucleic acid binding; F:RNA-DNA hybrid ribonuclease activity	IPR000477 (PFAM); IPR036397 (G3DSA:3.30.420.GENE3D); IPR002156 (PFAM); PTHR19446 (PANTHER); PTHR19446:SF427 (PANTHER); PTHR19446 (PANTHER); PTHR19446:SF427 (PANTHER); NON_CYTOPLASMIC_DOMAIN (PHOBIUS); TRANSMEMBRANE (PHOBIUS); CYTOPLASMIC_DOMAIN (PHOBIUS); IPR002156 (PROSITE_PROFILES); IPR000477 (PROSITE_PROFILES); IPR043502 (SUPERFAMILY); IPR043502 (SUPERFAMILY); IPR012337 (SUPERFAMILY)	hypothetical protein EGW08_003526	P:GO:0090502; F:GO:0003676; F:GO:0004523	P:RNA phosphodiester bond hydrolysis, endonucleolytic; F:nucleic acid binding; F:RNA-DNA hybrid ribonuclease activity
Cnem001432-RA	255	XP_033113704.1	61.7	183.7	A0A3S0ZPX3	57.5	161.4	no hit	no GO terms	no GO terms	IPR029526 (PFAM); PTHR46599 (PANTHER)	uncharacterized protein LOC117114216	no GO terms	no GO terms
Cnem001433-RA	121	no hit	no hit	no hit	no hit	no hit	no hit	no hit	no GO terms	no GO terms	mobidb-lite (MOBIDB_LITE); mobidb-lite (MOBIDB_LITE); CYTOPLASMIC_DOMAIN (PHOBIUS); NON_CYTOPLASMIC_DOMAIN (PHOBIUS); TRANSMEMBRANE (PHOBIUS); TMhelix (TMHMM)	putative organic cation transporter protein-like	P:GO:0055085; F:GO:0022857; C:GO:0016021	P:transmembrane transport; F:transmembrane transporter activity; C:integral component of membrane
Cnem001437-RA	219	no hit	no hit	no hit	no hit	no hit	no hit	no hit	no IPS match	no IPS match	no IPS match	hypothetical protein EGW08_021432	no GO terms	no GO terms
Cnem001438-RA	217	WP_078461487.1;OOY49051.1	29.2	101.7	A0A433UD90	29.0	94.4	no hit	F:GO:0003676	F:nucleic acid binding	IPR036397 (G3DSA:3.30.420.GENE3D)	hypothetical protein	no GO terms	no GO terms
Cnem001455-RA	210	RUS92108.1	63.0	171.0	A0A433UEA3	63.0	171.0	no hit	P:GO:0006364; C:GO:0032040	P:rRNA processing; C:small-subunit processome	IPR007319 (PFAM); PTHR22840 (PANTHER); SIGNAL_PEPTIDE_N_REGION (PHOBIUS); NON_CYTOPLASMIC_DOMAIN (PHOBIUS); SIGNAL_PEPTIDE (PHOBIUS); SIGNAL_PEPTIDE_H_REGION (PHOBIUS); SIGNAL_PEPTIDE_C_REGION (PHOBIUS); TMhelix (TMHMM)	WD repeat-containing protein 36-like	P:GO:0006364; C:GO:0032040	P:rRNA processing; C:small-subunit processome
Cnem001456-RA	363	RUS92108.1	75.9	494.2	A0A433UEA3	75.9	494.2	K14554	F:GO:0005515	F:protein binding	IPR001680 (SMART); IPR001680 (PFAM); IPR015943 (G3DSA:2.130.10.GENE3D); IPR015943 (G3DSA:2.130.10.GENE3D); PTHR22840 (PANTHER); IPR017986 (PROSITE_PROFILES); IPR017986 (PROSITE_PROFILES); IPR001680 (PROSITE_PROFILES); IPR001680 (PROSITE_PROFILES); IPR036322 (SUPERFAMILY)	hypothetical protein EGW08_000132	P:GO:0006364; C:GO:0032040	P:rRNA processing; C:small-subunit processome
Cnem001461-RA	210	no hit	no hit	no hit	no hit	no hit	no hit	no hit	no IPS match	no IPS match	no IPS match	hypothetical protein EGW08_021432	no GO terms	no GO terms
Cnem001468-RA	1205	KAF0305860.1	34.7	597.0	A0A433U4I6	50.0	595.9	no hit	F:GO:0003676; F:GO:0004523	F:nucleic acid binding; F:RNA-DNA hybrid ribonuclease activity	IPR000477 (PFAM); IPR002156 (PFAM); IPR036691 (G3DSA:3.60.10.GENE3D); IPR005135 (PFAM); IPR036397 (G3DSA:3.30.420.GENE3D); mobidb-lite (MOBIDB_LITE); mobidb-lite (MOBIDB_LITE); PTHR33332:SF19 (PANTHER); PTHR33332 (PANTHER); IPR000477 (PROSITE_PROFILES); IPR002156 (PROSITE_PROFILES); cd01650 (CDD); IPR012337 (SUPERFAMILY); IPR036691 (SUPERFAMILY); IPR043502 (SUPERFAMILY)	hypothetical protein EGW08_003526	P:GO:0090502; F:GO:0003676; F:GO:0004523	P:RNA phosphodiester bond hydrolysis, endonucleolytic; F:nucleic acid binding; F:RNA-DNA hybrid ribonuclease activity
Cnem001480-RA	366	RUS88711.1	46.6	270.4	A0A433U4I6	46.6	270.4	no hit	no GO terms	no GO terms	IPR000477 (PFAM); IPR000477 (PROSITE_PROFILES)	hypothetical protein EGW08_003526	P:GO:0090502; F:GO:0003676; F:GO:0004523	P:RNA phosphodiester bond hydrolysis, endonucleolytic; F:nucleic acid binding; F:RNA-DNA hybrid ribonuclease activity
Cnem001484-RA	520	EDO33832.1	39.0	149.1	A7SR14	39.0	149.1	no hit	no GO terms	no GO terms	Coil (COILS)	Maverick ATPase p31.3	no GO terms	no GO terms
Cnem001487-RA	971	KAF0297117.1	33.5	304.3	A0A3B5QAR3	23.7	166.0	no hit	no GO terms	no GO terms	IPR024445 (SMART); IPR024445 (PFAM); IPR036691 (G3DSA:3.60.10.GENE3D); IPR000477 (PFAM); PTHR33332 (PANTHER); IPR000477 (PROSITE_PROFILES); IPR000477 (PROSITE_PROFILES); cd01650 (CDD); IPR036691 (SUPERFAMILY); IPR043502 (SUPERFAMILY)	PREDICTED: uncharacterized protein LOC106013216	no GO terms	no GO terms
Cnem001488-RA	578	VVC37259.1	30.7	293.5	J9KUA2	33.0	291.6	no hit	no GO terms	no GO terms	IPR000477 (PFAM); IPR005135 (PFAM); IPR036691 (G3DSA:3.60.10.GENE3D); PTHR23227:SF68 (PANTHER); IPR027124 (PANTHER); cd01650 (CDD); cd09076 (CDD); IPR043502 (SUPERFAMILY); IPR036691 (SUPERFAMILY)	craniofacial development protein 2-like	no GO terms	no GO terms
Cnem001489-RA	292	XP_012943779.1	55.2	160.2	A0A433TU54	42.9	111.3	no hit	no GO terms	no GO terms	IPR000477 (PFAM); IPR000477 (PROSITE_PROFILES); IPR043502 (SUPERFAMILY)	PREDICTED: uncharacterized protein LOC106013216	no GO terms	no GO terms
Cnem001490-RA	527	XP_020897515.1	61.9	668.3	K7EWE4	55.4	604.4	no hit	no GO terms	no GO terms	IPR005135 (PFAM); IPR036691 (G3DSA:3.60.10.GENE3D); IPR027124 (PANTHER); PTHR23227:SF49 (PANTHER); cd09076 (CDD); IPR036691 (SUPERFAMILY)	craniofacial development protein 2	no GO terms	no GO terms
Cnem001496-RA	416	XP_005092357.1	39.2	132.1	A0A3S0ZYQ8	30.4	95.5	no hit	no GO terms	no GO terms	IPR005135 (PFAM); IPR036691 (G3DSA:3.60.10.GENE3D); mobidb-lite (MOBIDB_LITE); IPR036691 (SUPERFAMILY)	PREDICTED: uncharacterized protein LOC106011017	no GO terms	no GO terms
Cnem001501-RA	249	XP_012946242.1	54.2	166.4	A0A433U4I6	35.7	156.0	no hit	no GO terms	no GO terms	IPR000477 (PFAM); NON_CYTOPLASMIC_DOMAIN (PHOBIUS); CYTOPLASMIC_DOMAIN (PHOBIUS); TRANSMEMBRANE (PHOBIUS); IPR000477 (PROSITE_PROFILES); IPR043502 (SUPERFAMILY)	RNA-directed DNA polymerase from mobile element jockey-like	no GO terms	no GO terms
Cnem001502-RA	274	XP_012946242.1	41.0	123.2	A0A2S4VEN2	26.1	63.5	no hit	no GO terms	no GO terms	IPR000477 (PFAM); IPR000477 (PROSITE_PROFILES)	RNA-directed DNA polymerase from mobile element jockey-like	no GO terms	no GO terms
Cnem001509-RA	1365	XP_020627207.1	32.4	563.1	W4XIZ7	30.2	508.1	no hit	P:GO:0015074; F:GO:0003676	P:DNA integration; F:nucleic acid binding	Coil (COILS); Coil (COILS); IPR001584 (PFAM); G3DSA:1.10.340.70 (GENE3D); IPR043128 (G3DSA:3.30.70.GENE3D); IPR041373 (PFAM); G3DSA:3.10.10.10 (GENE3D); IPR036397 (G3DSA:3.30.420.GENE3D); IPR043128 (G3DSA:3.30.70.GENE3D); G3DSA:3.10.20.370 (GENE3D); IPR041588 (PFAM); IPR000477 (PFAM); mobidb-lite (MOBIDB_LITE); mobidb-lite (MOBIDB_LITE); mobidb-lite (MOBIDB_LITE); PTHR24559:SF269 (PANTHER); PTHR2…	DDE-type integrase/transposase/recombinase	no GO terms	no GO terms
Cnem001523-RA	152	no hit	no hit	no hit	no hit	no hit	no hit	no hit	no GO terms	no GO terms	CYTOPLASMIC_DOMAIN (PHOBIUS); TRANSMEMBRANE (PHOBIUS); TRANSMEMBRANE (PHOBIUS); CYTOPLASMIC_DOMAIN (PHOBIUS); NON_CYTOPLASMIC_DOMAIN (PHOBIUS)	---NA---	no GO terms	no GO terms
Cnem001527-RA	921	RUS88711.1	50.0	569.3	A0A433U4I6	50.0	569.3	no hit	F:GO:0003676; F:GO:0004523	F:nucleic acid binding; F:RNA-DNA hybrid ribonuclease activity	IPR036397 (G3DSA:3.30.420.GENE3D); IPR002156 (PFAM); IPR000477 (PFAM); PTHR33332 (PANTHER); PTHR33332:SF19 (PANTHER); IPR000477 (PROSITE_PROFILES); IPR002156 (PROSITE_PROFILES); cd01650 (CDD); cd09276 (CDD); IPR012337 (SUPERFAMILY); IPR043502 (SUPERFAMILY)	hypothetical protein EGW08_003526	P:GO:0090502; F:GO:0003676; F:GO:0004523	P:RNA phosphodiester bond hydrolysis, endonucleolytic; F:nucleic acid binding; F:RNA-DNA hybrid ribonuclease activity
Cnem001528-RA	908	OOZ58401.1	44.0	625.2	D6WH09	30.4	354.4	no hit	P:GO:0015074; F:GO:0003676	P:DNA integration; F:nucleic acid binding	Coil (COILS); Coil (COILS); IPR041577 (PFAM); G3DSA:1.10.340.70 (GENE3D); IPR041588 (PFAM); IPR036397 (G3DSA:3.30.420.GENE3D); IPR043128 (G3DSA:3.30.70.GENE3D); IPR001584 (PFAM); IPR043128 (G3DSA:3.30.70.GENE3D); G3DSA:3.10.20.370 (GENE3D); IPR000477 (PFAM); mobidb-lite (MOBIDB_LITE); mobidb-lite (MOBIDB_LITE); mobidb-lite (MOBIDB_LITE); PTHR24559:SF275 (PANTHER); PTHR24559 (PANTHER); IPR000477 (…	DDE-type integrase/transposase/recombinase	no GO terms	no GO terms
Cnem001529-RA	267	XP_005106522.1	38.2	90.5	no hit	no hit	no hit	no hit	F:GO:0003676; F:GO:0004523	F:nucleic acid binding; F:RNA-DNA hybrid ribonuclease activity	IPR036397 (G3DSA:3.30.420.GENE3D); mobidb-lite (MOBIDB_LITE); IPR002156 (PROSITE_PROFILES); IPR012337 (SUPERFAMILY)	hypothetical protein EGW08_008040	P:GO:0090502; F:GO:0003676; F:GO:0004523	P:RNA phosphodiester bond hydrolysis, endonucleolytic; F:nucleic acid binding; F:RNA-DNA hybrid ribonuclease activity
Cnem001535-RA	746	OOZ58401.1	45.9	623.2	A0A139W8W2	33.2	380.9	no hit	P:GO:0015074; F:GO:0003676	P:DNA integration; F:nucleic acid binding	G3DSA:3.10.20.370 (GENE3D); G3DSA:1.10.340.70 (GENE3D); IPR041577 (PFAM); IPR043128 (G3DSA:3.30.70.GENE3D); IPR041588 (PFAM); IPR036397 (G3DSA:3.30.420.GENE3D); IPR043128 (G3DSA:3.30.70.GENE3D); IPR001584 (PFAM); IPR000477 (PFAM); G3DSA:3.10.10.10 (GENE3D); PTHR24559 (PANTHER); PTHR24559:SF269 (PANTHER); IPR000477 (PROSITE_PROFILES); IPR001584 (PROSITE_PROFILES); cd09274 (CDD); cd01647 (CDD); IPR…	hypothetical protein BOW44_13110, partial	no GO terms	no GO terms
Cnem001541-RA	230	no hit	no hit	no hit	no hit	no hit	no hit	no hit	F:GO:0003676	F:nucleic acid binding	IPR036397 (G3DSA:3.30.420.GENE3D); IPR012337 (SUPERFAMILY)	hypothetical protein EGW08_003526	P:GO:0090502; F:GO:0003676; F:GO:0004523	P:RNA phosphodiester bond hydrolysis, endonucleolytic; F:nucleic acid binding; F:RNA-DNA hybrid ribonuclease activity
Cnem001542-RA	337	RUS88711.1	42.8	288.1	A0A433U4I6	42.8	288.1	no hit	F:GO:0003676; F:GO:0004523	F:nucleic acid binding; F:RNA-DNA hybrid ribonuclease activity	IPR036397 (G3DSA:3.30.420.GENE3D); IPR000477 (PFAM); IPR002156 (PROSITE_PROFILES); IPR000477 (PROSITE_PROFILES); IPR012337 (SUPERFAMILY)	hypothetical protein EGW08_012163	P:GO:0090502; F:GO:0003676; F:GO:0004523	P:RNA phosphodiester bond hydrolysis, endonucleolytic; F:nucleic acid binding; F:RNA-DNA hybrid ribonuclease activity
Cnem001543-RA	442	XP_013072998.1	62.6	365.9	A0A2C9JM74	62.6	365.9	no hit	no GO terms	no GO terms	mobidb-lite (MOBIDB_LITE); mobidb-lite (MOBIDB_LITE); mobidb-lite (MOBIDB_LITE); mobidb-lite (MOBIDB_LITE); mobidb-lite (MOBIDB_LITE); mobidb-lite (MOBIDB_LITE); mobidb-lite (MOBIDB_LITE); mobidb-lite (MOBIDB_LITE)	protein hunchback-like	no GO terms	no GO terms
Cnem001545-RA	297	XP_005108794.1;XP_012943733.1	59.4	295.4	A0A2C9LTH1	55.7	260.0	no hit	P:GO:0007186; F:GO:0004930; C:GO:0016021	P:G protein-coupled receptor signaling pathway; F:G protein-coupled receptor activity; C:integral component of membrane	IPR000276 (PRINTS); G3DSA:1.20.1070.10 (GENE3D); IPR017452 (PFAM); PTHR24243 (PANTHER); IPR017452 (PROSITE_PROFILES); cd00637 (CDD); SSF81321 (SUPERFAMILY)	PREDICTED: uncharacterized protein LOC101847221	no GO terms	no GO terms
Cnem001549-RA	959	XP_014677047.1	51.8	261.5	A0A3S1C192	42.1	316.6	no hit	F:GO:0003676; F:GO:0004523	F:nucleic acid binding; F:RNA-DNA hybrid ribonuclease activity	IPR036397 (G3DSA:3.30.420.GENE3D); IPR000477 (PFAM); PTHR19446 (PANTHER); PTHR19446:SF427 (PANTHER); IPR002156 (PROSITE_PROFILES); IPR000477 (PROSITE_PROFILES); IPR012337 (SUPERFAMILY); IPR043502 (SUPERFAMILY)	hypothetical protein EGW08_012012	no GO terms	no GO terms
Cnem001550-RA	1062	RUS76136.1	46.9	77.4	A0A3S1AZH6	46.9	77.4	no hit	no GO terms	no GO terms	mobidb-lite (MOBIDB_LITE); mobidb-lite (MOBIDB_LITE); mobidb-lite (MOBIDB_LITE); mobidb-lite (MOBIDB_LITE); PTHR47027:SF6 (PANTHER); PTHR47027 (PANTHER)	---NA---	no GO terms	no GO terms
Cnem001559-RA	335	XP_014677047.1	50.9	343.2	A0A2J7QE39	41.2	254.6	no hit	no GO terms	no GO terms	IPR000477 (PFAM); PTHR19446:SF427 (PANTHER); PTHR19446 (PANTHER); IPR000477 (PROSITE_PROFILES); cd01650 (CDD); IPR043502 (SUPERFAMILY)	PREDICTED: uncharacterized protein LOC106816918	no GO terms	no GO terms
Cnem001562-RA	507	RUS88711.1	42.8	308.9	A0A433U4I6	42.8	308.9	no hit	no GO terms	no GO terms	IPR000477 (PFAM); mobidb-lite (MOBIDB_LITE); PTHR33332:SF6 (PANTHER); PTHR33332 (PANTHER); IPR000477 (PROSITE_PROFILES)	hypothetical protein EGW08_003526	P:GO:0090502; F:GO:0003676; F:GO:0004523	P:RNA phosphodiester bond hydrolysis, endonucleolytic; F:nucleic acid binding; F:RNA-DNA hybrid ribonuclease activity
Cnem001563-RA	475	XP_012941987.1	78.0	712.6	A0A3S1B2R2	70.7	634.4	K11204	P:GO:0006750; F:GO:0003824; F:GO:0004357	P:glutathione biosynthetic process; F:catalytic activity; F:glutamate-cysteine ligase activity	IPR004308 (PFAM); G3DSA:3.30.590.50 (GENE3D); G3DSA:1.10.8.960 (GENE3D); mobidb-lite (MOBIDB_LITE); IPR004308 (PANTHER); IPR014746 (SUPERFAMILY)	glutamate--cysteine ligase catalytic subunit-like	no GO terms	no GO terms
Cnem001565-RA	241	no hit	no hit	no hit	no hit	no hit	no hit	no hit	no GO terms	no GO terms	mobidb-lite (MOBIDB_LITE); mobidb-lite (MOBIDB_LITE)	---NA---	no GO terms	no GO terms
Cnem001573-RA	169	RUS76869.1	34.4	78.2	A0A433T5K0	34.4	78.2	no hit	no GO terms	no GO terms	G3DSA:3.40.1390.30 (GENE3D); IPR036069 (SUPERFAMILY)	hypothetical protein EGW08_015360, partial	no GO terms	no GO terms
Cnem001575-RA	252	RUS80613.1	71.4	307.8	A0A3S1A1Y1	71.4	307.8	no hit	F:GO:0008270	F:zinc ion binding	IPR000315 (PFAM); G3DSA:3.30.40.200 (GENE3D); PTHR25462 (PANTHER); PTHR25462:SF261 (PANTHER); IPR000315 (PROSITE_PROFILES); IPR000315 (CDD); SSF57845 (SUPERFAMILY)	hypothetical protein EGW08_011623, partial	F:GO:0008270	F:zinc ion binding
Cnem001582-RA	380	XP_012941316.1	36.9	181.0	A0A3S1A1Y1	66.0	147.9	no hit	F:GO:0003676; F:GO:0004523; F:GO:0008270	F:nucleic acid binding; F:RNA-DNA hybrid ribonuclease activity; F:zinc ion binding	IPR000315 (PFAM); IPR002156 (PFAM); IPR036397 (G3DSA:3.30.420.GENE3D); G3DSA:3.30.40.200 (GENE3D); PTHR10642:SF0 (PANTHER); PTHR10642 (PANTHER); IPR002156 (PROSITE_PROFILES); IPR000315 (PROSITE_PROFILES); IPR000315 (CDD); cd09276 (CDD); SSF57845 (SUPERFAMILY); IPR012337 (SUPERFAMILY)	hypothetical protein EGW08_008040	P:GO:0090502; F:GO:0003676; F:GO:0004523	P:RNA phosphodiester bond hydrolysis, endonucleolytic; F:nucleic acid binding; F:RNA-DNA hybrid ribonuclease activity
Cnem001585-RA	212	RUS80613.1	57.9	154.5	A0A3S1A1Y1	57.9	154.5	no hit	no IPS match	no IPS match	no IPS match	hypothetical protein EGW08_011625, partial	F:GO:0008270	F:zinc ion binding
Cnem001590-RA	278	RUS89376.1	38.7	107.5	A0A3S1CD12	38.7	107.5	no hit	no GO terms	no GO terms	PTHR47027:SF6 (PANTHER); PTHR47027 (PANTHER); PTHR47027:SF6 (PANTHER)	hypothetical protein EGW08_002896	F:GO:0005524; C:GO:0016021	F:ATP binding; C:integral component of membrane
Cnem001595-RA	268	RUS89376.1	38.7	107.5	A0A3S1CD12	38.7	107.5	no hit	no GO terms	no GO terms	PTHR47027:SF6 (PANTHER); PTHR47027 (PANTHER)	hypothetical protein EGW08_002896	F:GO:0005524; C:GO:0016021	F:ATP binding; C:integral component of membrane
Cnem001597-RA	278	RUS89376.1	39.4	108.2	A0A3S1CD12	39.4	108.2	no hit	no GO terms	no GO terms	PTHR47027 (PANTHER); PTHR47027:SF6 (PANTHER); PTHR47027 (PANTHER); PTHR47027:SF6 (PANTHER)	hypothetical protein EGW08_002896	F:GO:0005524; C:GO:0016021	F:ATP binding; C:integral component of membrane
Cnem001605-RA	388	XP_013072553.1	64.0	521.9	A0A2C9JLY2	64.0	521.9	K04946	no GO terms	no GO terms	G3DSA:1.10.287.70 (GENE3D); IPR013099 (PFAM); G3DSA:3.40.50.720 (GENE3D); mobidb-lite (MOBIDB_LITE); mobidb-lite (MOBIDB_LITE); PTHR10027:SF9 (PANTHER); PTHR10027:SF9 (PANTHER); PTHR10027 (PANTHER); PTHR10027 (PANTHER); SSF81324 (SUPERFAMILY)	slack isoform 2	P:GO:0006813; C:GO:0016021	P:potassium ion transport; C:integral component of membrane
Cnem001606-RA	428	XP_013072553.1	78.3	201.1	A0A2C9JLY2	78.3	201.1	no hit	P:GO:0006813; C:GO:0016020	P:potassium ion transport; C:membrane	IPR003929 (PFAM); mobidb-lite (MOBIDB_LITE); PTHR47027:SF6 (PANTHER); PTHR47027 (PANTHER); IPR013087 (PROSITE_PROFILES)	potassium channel subfamily T member 2-like	P:GO:0006813; C:GO:0016021	P:potassium ion transport; C:integral component of membrane
Cnem001607-RA	380	XP_012935864.1	63.7	465.3	A0A2C9JLY2	60.9	416.8	no hit	no GO terms	no GO terms	G3DSA:3.40.50.720 (GENE3D); mobidb-lite (MOBIDB_LITE); mobidb-lite (MOBIDB_LITE); PTHR10027:SF35 (PANTHER); PTHR10027 (PANTHER); PTHR10027 (PANTHER)	potassium channel subfamily T member 1	no GO terms	no GO terms
Cnem001608-RA	300	WP_078461487.1;OOY49051.1	39.4	199.9	A0A3S1ASJ4	32.7	156.4	no hit	F:GO:0003676; F:GO:0004523	F:nucleic acid binding; F:RNA-DNA hybrid ribonuclease activity	IPR002156 (PFAM); IPR036397 (G3DSA:3.30.420.GENE3D); PTHR10642:SF23 (PANTHER); PTHR10642 (PANTHER); IPR002156 (PROSITE_PROFILES); cd09276 (CDD); IPR012337 (SUPERFAMILY)	hypothetical protein	no GO terms	no GO terms
Cnem001610-RA	193	no hit	no hit	no hit	no hit	no hit	no hit	no hit	no GO terms	no GO terms	PTHR47027 (PANTHER); PTHR47027:SF6 (PANTHER)	hypothetical protein EGW08_002896	F:GO:0005524; C:GO:0016021	F:ATP binding; C:integral component of membrane
Cnem001611-RA	613	AXI69352.1	83.8	226.9	A0A3S0ZYQ8	31.1	165.6	no hit	no GO terms	no GO terms	IPR024445 (PFAM); IPR036691 (G3DSA:3.60.10.GENE3D); IPR005135 (PFAM); PTHR47163 (PANTHER); IPR036691 (SUPERFAMILY)	RNA-directed DNA polymerase	P:GO:0006278; F:GO:0003964	P:RNA-dependent DNA biosynthetic process; F:RNA-directed DNA polymerase activity
Cnem001612-RA	684	RUS88711.1	38.6	400.6	A0A433U4I6	38.6	400.6	no hit	F:GO:0003676; F:GO:0004523	F:nucleic acid binding; F:RNA-DNA hybrid ribonuclease activity	IPR002156 (PFAM); IPR036397 (G3DSA:3.30.420.GENE3D); IPR000477 (PFAM); PTHR33332:SF10 (PANTHER); PTHR33332 (PANTHER); IPR000477 (PROSITE_PROFILES); IPR002156 (PROSITE_PROFILES); IPR012337 (SUPERFAMILY)	hypothetical protein EGW08_003526	P:GO:0090502; F:GO:0003676; F:GO:0004523	P:RNA phosphodiester bond hydrolysis, endonucleolytic; F:nucleic acid binding; F:RNA-DNA hybrid ribonuclease activity
Cnem001614-RA	118	RUS83451.1	72.4	98.2	A0A3S1BGI8	72.4	98.2	no hit	no GO terms	no GO terms	mobidb-lite (MOBIDB_LITE); mobidb-lite (MOBIDB_LITE); mobidb-lite (MOBIDB_LITE); mobidb-lite (MOBIDB_LITE)	hypothetical protein EGW08_008767, partial	no GO terms	no GO terms
Cnem001617-RA	376	RUS88711.1	42.1	244.6	A0A3S1BBB4	42.1	244.6	no hit	F:GO:0003676; F:GO:0004523	F:nucleic acid binding; F:RNA-DNA hybrid ribonuclease activity	IPR036397 (G3DSA:3.30.420.GENE3D); IPR000477 (PFAM); PTHR33332:SF10 (PANTHER); PTHR33332 (PANTHER); IPR002156 (PROSITE_PROFILES); IPR000477 (PROSITE_PROFILES); IPR043502 (SUPERFAMILY); IPR012337 (SUPERFAMILY)	hypothetical protein EGW08_003526	P:GO:0090502; F:GO:0003676; F:GO:0004523	P:RNA phosphodiester bond hydrolysis, endonucleolytic; F:nucleic acid binding; F:RNA-DNA hybrid ribonuclease activity
Cnem001625-RA	332	XP_012940556.1	57.7	134.0	A0A2T7NN52	43.4	94.7	no hit	no GO terms	no GO terms	IPR041588 (PFAM); G3DSA:1.10.340.70 (GENE3D)	hypothetical protein EGW08_013489	no GO terms	no GO terms
Cnem001627-RA	501	RUS88711.1	33.4	148.3	A0A433U4I6	33.4	148.3	no hit	no GO terms	no GO terms	IPR000477 (PFAM); mobidb-lite (MOBIDB_LITE); mobidb-lite (MOBIDB_LITE); PTHR47027 (PANTHER); PTHR47027 (PANTHER); PTHR47027:SF5 (PANTHER); PTHR47027:SF5 (PANTHER); TRANSMEMBRANE (PHOBIUS); CYTOPLASMIC_DOMAIN (PHOBIUS); NON_CYTOPLASMIC_DOMAIN (PHOBIUS)	hypothetical protein EGW08_003526	P:GO:0090502; F:GO:0003676; F:GO:0004523	P:RNA phosphodiester bond hydrolysis, endonucleolytic; F:nucleic acid binding; F:RNA-DNA hybrid ribonuclease activity
Cnem001637-RA	1664	WP_144078600.1	42.7	886.3	A0A2S4PL55	30.4	503.1	no hit	P:GO:0015074; F:GO:0003676	P:DNA integration; F:nucleic acid binding	Coil (COILS); IPR036397 (G3DSA:3.30.420.GENE3D); IPR041588 (PFAM); IPR021109 (G3DSA:2.40.70.GENE3D); G3DSA:3.10.20.370 (GENE3D); G3DSA:3.10.10.10 (GENE3D); IPR000477 (PFAM); IPR043128 (G3DSA:3.30.70.GENE3D); G3DSA:1.10.340.70 (GENE3D); IPR018061 (PFAM); IPR041577 (PFAM); IPR001584 (PFAM); IPR043128 (G3DSA:3.30.70.GENE3D); mobidb-lite (MOBIDB_LITE); mobidb-lite (MOBIDB_LITE); PTHR24559:SF269 (PANT…	DDE-type integrase/transposase/recombinase	no GO terms	no GO terms
Cnem001638-RA	458	XP_012943779.1	46.1	206.8	A0A433U4I6	40.6	194.1	no hit	F:GO:0003676; F:GO:0004523	F:nucleic acid binding; F:RNA-DNA hybrid ribonuclease activity	IPR000477 (PFAM); IPR002156 (PFAM); IPR036397 (G3DSA:3.30.420.GENE3D); PTHR19446 (PANTHER); IPR002156 (PROSITE_PROFILES); IPR000477 (PROSITE_PROFILES); cd09276 (CDD); IPR043502 (SUPERFAMILY); IPR012337 (SUPERFAMILY)	PREDICTED: uncharacterized protein LOC106013216	no GO terms	no GO terms
Cnem001639-RA	662	XP_014677047.1	50.8	392.9	A0A3S0ZV17	42.8	374.8	no hit	no GO terms	no GO terms	IPR036691 (G3DSA:3.60.10.GENE3D); IPR000477 (PFAM); PTHR19446:SF427 (PANTHER); PTHR19446 (PANTHER); IPR000477 (PROSITE_PROFILES); cd01650 (CDD); IPR043502 (SUPERFAMILY); IPR036691 (SUPERFAMILY)	PREDICTED: uncharacterized protein LOC106816918	no GO terms	no GO terms
Cnem001643-RA	457	WP_078461487.1;OOY49051.1	49.7	290.0	A0A3S1BCT8	39.2	288.5	no hit	no GO terms	no GO terms	IPR000477 (PFAM); PTHR33332:SF21 (PANTHER); PTHR33332 (PANTHER); IPR000477 (PROSITE_PROFILES); cd01650 (CDD)	hypothetical protein	no GO terms	no GO terms
Cnem001649-RA	391	RUS88711.1	30.0	186.4	A0A433U4I6	30.0	186.4	no hit	no GO terms	no GO terms	IPR000477 (PFAM); IPR000477 (PROSITE_PROFILES)	PREDICTED: uncharacterized protein LOC106013216	no GO terms	no GO terms
Cnem001650-RA	1116	WP_144078600.1	37.9	781.6	A0A139W8W2	29.6	408.7	no hit	P:GO:0015074; F:GO:0003676	P:DNA integration; F:nucleic acid binding	IPR000477 (PFAM); IPR043128 (G3DSA:3.30.70.GENE3D); G3DSA:3.10.20.370 (GENE3D); IPR001584 (PFAM); IPR036397 (G3DSA:3.30.420.GENE3D); IPR041588 (PFAM); G3DSA:1.10.10.2300 (GENE3D); G3DSA:1.10.340.70 (GENE3D); IPR041373 (PFAM); G3DSA:2.30.30.140 (GENE3D); mobidb-lite (MOBIDB_LITE); PTHR24559 (PANTHER); PTHR24559:SF269 (PANTHER); PTHR24559 (PANTHER); IPR000477 (PROSITE_PROFILES); IPR001584 (PROSITE_…	DDE-type integrase/transposase/recombinase	no GO terms	no GO terms
Cnem001653-RA	231	GCF44533.1	32.1	125.9	A0A402EK07	32.1	125.9	no hit	no GO terms	no GO terms	PTHR47027:SF6 (PANTHER); PTHR47027 (PANTHER); IPR000477 (PROSITE_PROFILES)	LOW QUALITY PROTEIN: uncharacterized protein LOC112055225	no GO terms	no GO terms
Cnem001661-RA	248	no hit	no hit	no hit	no hit	no hit	no hit	no hit	no IPS match	no IPS match	no IPS match	PREDICTED: uncharacterized protein LOC106012380	no GO terms	no GO terms
Cnem001666-RA	395	PVD27370.1	43.2	221.1	A0A2T7P1U5	43.2	221.1	no hit	no GO terms	no GO terms	IPR000477 (PFAM); mobidb-lite (MOBIDB_LITE); mobidb-lite (MOBIDB_LITE); PTHR47027 (PANTHER); PTHR47027:SF5 (PANTHER)	hypothetical protein C0Q70_12527	no GO terms	no GO terms
Cnem001670-RA	268	no hit	no hit	no hit	A0A402F406	34.5	58.9	no hit	no GO terms	no GO terms	mobidb-lite (MOBIDB_LITE); mobidb-lite (MOBIDB_LITE)	---NA---	no GO terms	no GO terms
Cnem001672-RA	225	no hit	no hit	no hit	no hit	no hit	no hit	no hit	no IPS match	no IPS match	no IPS match	PREDICTED: uncharacterized protein LOC106011589	no GO terms	no GO terms
Cnem001674-RA	336	GCF40350.1	44.3	109.8	A0A402F556	36.8	106.7	no hit	no GO terms	no GO terms	Coil (COILS); mobidb-lite (MOBIDB_LITE); mobidb-lite (MOBIDB_LITE); PTHR47027:SF6 (PANTHER); PTHR47027 (PANTHER)	hypothetical protein parPi_0007364	no GO terms	no GO terms
Cnem001686-RA	523	XP_022296330.1	42.6	399.4	A0A433UD90	37.3	386.0	no hit	F:GO:0003676; F:GO:0004523	F:nucleic acid binding; F:RNA-DNA hybrid ribonuclease activity	IPR002156 (PFAM); IPR036397 (G3DSA:3.30.420.GENE3D); IPR036397 (G3DSA:3.30.420.GENE3D); PTHR10642 (PANTHER); IPR002156 (PROSITE_PROFILES); cd09276 (CDD); IPR012337 (SUPERFAMILY)	uncharacterized protein LOC111106094	no GO terms	no GO terms
Cnem001689-RA	194	ASZ84910.1	82.2	284.6	A0A0X3Q4H0	77.8	264.6	K01802	P:GO:0000413; P:GO:0006457; F:GO:0003755	P:protein peptidyl-prolyl isomerization; P:protein folding; F:peptidyl-prolyl cis-trans isomerase activity	IPR002130 (PRINTS); IPR002130 (PFAM); IPR024936 (PIRSF); IPR029000 (G3DSA:2.40.100.GENE3D); PTHR11071 (PANTHER); PTHR11071:SF434 (PANTHER); IPR020892 (PROSITE_PATTERNS); IPR002130 (PROSITE_PROFILES); cd01926 (CDD); IPR029000 (SUPERFAMILY)	cyclophilin	P:GO:0000413; P:GO:0006457; F:GO:0003755	P:protein peptidyl-prolyl isomerization; P:protein folding; F:peptidyl-prolyl cis-trans isomerase activity
Cnem001690-RA	240	no hit	no hit	no hit	no hit	no hit	no hit	no hit	no IPS match	no IPS match	no IPS match	hypothetical protein EGW08_021432	no GO terms	no GO terms
Cnem001697-RA	262	RUS81065.1	51.7	98.2	A0A3S1A2L0	51.7	98.2	no hit	no GO terms	no GO terms	mobidb-lite (MOBIDB_LITE); mobidb-lite (MOBIDB_LITE); PTHR47027:SF6 (PANTHER); PTHR47027 (PANTHER)	hypothetical protein EGW08_002896	F:GO:0005524; C:GO:0016021	F:ATP binding; C:integral component of membrane
Cnem001700-RA	370	XP_012943779.1	43.0	231.1	A0A433U4I6	51.4	179.1	no hit	no GO terms	no GO terms	IPR000477 (PFAM); IPR000477 (PROSITE_PROFILES); IPR043502 (SUPERFAMILY)	PREDICTED: uncharacterized protein LOC106013216	no GO terms	no GO terms
Cnem001701-RA	832	RUS70916.1	40.8	335.9	A0A3S1ASJ4	40.8	335.9	no hit	F:GO:0003676; F:GO:0004523	F:nucleic acid binding; F:RNA-DNA hybrid ribonuclease activity	IPR036397 (G3DSA:3.30.420.GENE3D); IPR036397 (G3DSA:3.30.420.GENE3D); IPR036397 (G3DSA:3.30.420.GENE3D); IPR002156 (PFAM); IPR000477 (PFAM); mobidb-lite (MOBIDB_LITE); mobidb-lite (MOBIDB_LITE); mobidb-lite (MOBIDB_LITE); mobidb-lite (MOBIDB_LITE); mobidb-lite (MOBIDB_LITE); PTHR33332 (PANTHER); PTHR33332:SF18 (PANTHER); IPR002156 (PROSITE_PROFILES); IPR000477 (PROSITE_PROFILES); IPR002156 (PROSI…	hypothetical protein	no GO terms	no GO terms
Cnem001704-RA	308	XP_014677047.1	44.7	283.1	A0A3P8TFH9	47.0	303.5	no hit	no GO terms	no GO terms	IPR000477 (PFAM); PTHR19446:SF427 (PANTHER); PTHR19446 (PANTHER); PTHR19446:SF427 (PANTHER); PTHR19446 (PANTHER); IPR000477 (PROSITE_PROFILES); cd01650 (CDD); IPR043502 (SUPERFAMILY)	hypothetical protein EGW08_016314	no GO terms	no GO terms
Cnem001711-RA	238	no hit	no hit	no hit	no hit	no hit	no hit	no hit	no IPS match	no IPS match	no IPS match	---NA---	no GO terms	no GO terms
Cnem001715-RA	592	XP_005103996.1	49.3	157.9	A0A3B3BBF5	32.7	93.2	no hit	no GO terms	no GO terms	IPR000477 (PFAM); PTHR33332 (PANTHER); TRANSMEMBRANE (PHOBIUS); CYTOPLASMIC_DOMAIN (PHOBIUS); NON_CYTOPLASMIC_DOMAIN (PHOBIUS); IPR000477 (PROSITE_PROFILES); IPR043502 (SUPERFAMILY)	hypothetical protein EGW08_012163	P:GO:0090502; F:GO:0003676; F:GO:0004523	P:RNA phosphodiester bond hydrolysis, endonucleolytic; F:nucleic acid binding; F:RNA-DNA hybrid ribonuclease activity
Cnem001722-RA	987	VEN57771.1	42.3	746.5	A0A2A4JBK9	39.0	672.9	no hit	no GO terms	no GO terms	IPR036691 (G3DSA:3.60.10.GENE3D); IPR000477 (PFAM); IPR005135 (PFAM); mobidb-lite (MOBIDB_LITE); PTHR19446:SF427 (PANTHER); PTHR19446 (PANTHER); IPR000477 (PROSITE_PROFILES); cd09076 (CDD); cd01650 (CDD); IPR043502 (SUPERFAMILY); IPR036691 (SUPERFAMILY)	unnamed protein product	no GO terms	no GO terms
Cnem001727-RA	340	RUS88711.1	35.7	219.2	A0A433U4I6	35.7	219.2	no hit	F:GO:0003676; F:GO:0004523	F:nucleic acid binding; F:RNA-DNA hybrid ribonuclease activity	IPR036397 (G3DSA:3.30.420.GENE3D); IPR002156 (PROSITE_PROFILES); IPR012337 (SUPERFAMILY)	hypothetical protein EGW08_003526	P:GO:0090502; F:GO:0003676; F:GO:0004523	P:RNA phosphodiester bond hydrolysis, endonucleolytic; F:nucleic acid binding; F:RNA-DNA hybrid ribonuclease activity
Cnem001730-RA	152	no hit	no hit	no hit	no hit	no hit	no hit	no hit	no GO terms	no GO terms	mobidb-lite (MOBIDB_LITE)	---NA---	no GO terms	no GO terms
Cnem001737-RA	401	WP_078461487.1;OOY49051.1	50.1	371.3	A0A2T7NLY0	45.0	311.2	no hit	no GO terms	no GO terms	IPR000477 (PFAM); PTHR19446:SF427 (PANTHER); PTHR19446 (PANTHER); IPR000477 (PROSITE_PROFILES); cd01650 (CDD); IPR043502 (SUPERFAMILY)	hypothetical protein, partial	no GO terms	no GO terms
Cnem001746-RA	237	KXJ10292.1	43.6	61.6	H3B2Y3	38.0	59.3	no hit	no IPS match	no IPS match	no IPS match	hypothetical protein EGW08_021432	no GO terms	no GO terms
Cnem001748-RA	459	TWW62323.1	45.7	70.9	A0A2G8JQR5	47.8	70.1	no hit	no GO terms	no GO terms	mobidb-lite (MOBIDB_LITE); mobidb-lite (MOBIDB_LITE); PTHR47027:SF4 (PANTHER); PTHR47027 (PANTHER); TRANSMEMBRANE (PHOBIUS); CYTOPLASMIC_DOMAIN (PHOBIUS); NON_CYTOPLASMIC_DOMAIN (PHOBIUS); TRANSMEMBRANE (PHOBIUS); CYTOPLASMIC_DOMAIN (PHOBIUS); TMhelix (TMHMM)	---NA---	no GO terms	no GO terms
Cnem001753-RA	126	RUS72858.1	78.7	101.3	A0A433SU87	78.7	101.3	no hit	no GO terms	no GO terms	G3DSA:1.20.1070.10 (GENE3D); PTHR46641:SF12 (PANTHER); PTHR46641 (PANTHER); TRANSMEMBRANE (PHOBIUS); TRANSMEMBRANE (PHOBIUS); CYTOPLASMIC_DOMAIN (PHOBIUS); CYTOPLASMIC_DOMAIN (PHOBIUS); NON_CYTOPLASMIC_DOMAIN (PHOBIUS); cd14978 (CDD); TMhelix (TMHMM); TMhelix (TMHMM)	hypothetical protein EGW08_019381	P:GO:0007186; F:GO:0004930; C:GO:0016021	P:G protein-coupled receptor signaling pathway; F:G protein-coupled receptor activity; C:integral component of membrane
Cnem001754-RA	529	WP_078461487.1;OOY49051.1	46.0	464.9	A0A3S1ASJ4	39.6	391.7	no hit	F:GO:0003676; F:GO:0004523	F:nucleic acid binding; F:RNA-DNA hybrid ribonuclease activity	IPR036397 (G3DSA:3.30.420.GENE3D); IPR002156 (PFAM); IPR000477 (PFAM); PTHR10642 (PANTHER); IPR000477 (PROSITE_PROFILES); IPR002156 (PROSITE_PROFILES); cd09276 (CDD); IPR012337 (SUPERFAMILY)	hypothetical protein	no GO terms	no GO terms
Cnem001756-RA	316	CAB3263295.1	46.2	126.7	A0A402F7Q9	40.2	109.8	no hit	no GO terms	no GO terms	Coil (COILS); mobidb-lite (MOBIDB_LITE); mobidb-lite (MOBIDB_LITE); mobidb-lite (MOBIDB_LITE); PTHR47027 (PANTHER); PTHR47027:SF6 (PANTHER); CYTOPLASMIC_DOMAIN (PHOBIUS); TRANSMEMBRANE (PHOBIUS); NON_CYTOPLASMIC_DOMAIN (PHOBIUS); cd14978 (CDD); TMhelix (TMHMM)	hypothetical protein EGW08_002896	F:GO:0005524; C:GO:0016021	F:ATP binding; C:integral component of membrane
Cnem001760-RA	214	RUS89376.1	45.3	107.8	A0A3S1CD12	45.3	107.8	no hit	no GO terms	no GO terms	PTHR47027:SF6 (PANTHER); PTHR47027 (PANTHER)	hypothetical protein EGW08_002896	F:GO:0005524; C:GO:0016021	F:ATP binding; C:integral component of membrane
Cnem001761-RA	422	KXJ09478.1	39.1	191.8	A0A0J7KC45	39.9	160.6	no hit	no GO terms	no GO terms	IPR036691 (G3DSA:3.60.10.GENE3D); PTHR23227:SF62 (PANTHER); IPR027124 (PANTHER); CYTOPLASMIC_DOMAIN (PHOBIUS); CYTOPLASMIC_DOMAIN (PHOBIUS); TRANSMEMBRANE (PHOBIUS); TRANSMEMBRANE (PHOBIUS); NON_CYTOPLASMIC_DOMAIN (PHOBIUS); CYTOPLASMIC_DOMAIN (PHOBIUS); NON_CYTOPLASMIC_DOMAIN (PHOBIUS); TRANSMEMBRANE (PHOBIUS); TRANSMEMBRANE (PHOBIUS); IPR036691 (SUPERFAMILY); TMhelix (TMHMM); TMhelix (TMHMM); T…	---NA---	no GO terms	no GO terms
Cnem001774-RA	504	GCF48631.1	42.3	436.8	A0A402EWP9	42.3	436.8	no hit	no GO terms	no GO terms	IPR000477 (PFAM); PTHR19446 (PANTHER); PTHR19446:SF427 (PANTHER); IPR000477 (PROSITE_PROFILES); cd01650 (CDD); IPR043502 (SUPERFAMILY)	hypothetical protein parPi_0014784	no GO terms	no GO terms
Cnem001776-RA	532	RUS90242.1	39.5	344.0	A0A433U8U8	39.5	344.0	K07071	no GO terms	no GO terms	Coil (COILS); IPR013549 (PFAM); IPR010099 (TIGRFAM); G3DSA:3.40.50.720 (GENE3D); PTHR11092 (PANTHER); PTHR11092:SF0 (PANTHER); IPR036291 (SUPERFAMILY); IPR036291 (SUPERFAMILY)	epimerase family protein SDR39U1-like	no GO terms	no GO terms
Cnem001779-RA	1304	WP_144078600.1	43.0	929.9	A0A3P8Q5A9	33.3	507.7	no hit	P:GO:0015074; F:GO:0003676	P:DNA integration; F:nucleic acid binding	Coil (COILS); Coil (COILS); IPR036397 (G3DSA:3.30.420.GENE3D); G3DSA:3.10.20.370 (GENE3D); IPR043128 (G3DSA:3.30.70.GENE3D); IPR001584 (PFAM); IPR043128 (G3DSA:3.30.70.GENE3D); G3DSA:1.10.340.70 (GENE3D); IPR041373 (PFAM); IPR000477 (PFAM); IPR041588 (PFAM); G3DSA:3.10.10.10 (GENE3D); mobidb-lite (MOBIDB_LITE); mobidb-lite (MOBIDB_LITE); mobidb-lite (MOBIDB_LITE); mobidb-lite (MOBIDB_LITE); mobid…	DDE-type integrase/transposase/recombinase	no GO terms	no GO terms
Cnem001780-RA	205	XP_005096331.1	58.0	228.0	A0A2C9LFZ9	53.5	221.9	K14459	F:GO:0015929	F:hexosaminidase activity	IPR038901 (PANTHER)	hexosaminidase D-like	no GO terms	no GO terms
Cnem001781-RA	350	XP_005092123.1	66.4	421.8	A0A433UEH0	66.1	399.1	no hit	no GO terms	no GO terms	IPR003409 (SMART); G3DSA:2.20.110.10 (GENE3D); IPR003409 (PFAM); PTHR43215 (PANTHER); SSF82185 (SUPERFAMILY); SSF82185 (SUPERFAMILY)	PREDICTED: uncharacterized protein LOC101861022 isoform X6	no GO terms	no GO terms
Cnem001784-RA	200	XP_005092111.1;XP_012947008.1	56.1	278.1	A0A2C9KL64	41.7	239.6	no hit	no IPS match	no IPS match	no IPS match	PREDICTED: uncharacterized protein LOC101860002 isoform X1	no GO terms	no GO terms
Cnem001788-RA	182	AXI69353.1	95.6	258.1	A0A2C9K5Z3	94.3	255.4	K02977	P:GO:0006412; F:GO:0003735; F:GO:0005515; C:GO:0005840	P:translation; F:structural constituent of ribosome; F:protein binding; C:ribosome	IPR019956 (PRINTS); IPR000626 (SMART); IPR002906 (SMART); G3DSA:3.10.20.90 (GENE3D); IPR002906 (PFAM); IPR038582 (G3DSA:2.20.25.GENE3D); IPR000626 (PFAM); PTHR10666 (PANTHER); PTHR10666:SF291 (PANTHER); IPR019954 (PROSITE_PATTERNS); IPR000626 (PROSITE_PROFILES); cd01803 (CDD); IPR011332 (SUPERFAMILY); IPR029071 (SUPERFAMILY)	ubiquitin-40S ribosomal protein S27a	no GO terms	no GO terms
Cnem001789-RA	263	no hit	no hit	no hit	no hit	no hit	no hit	no hit	no GO terms	no GO terms	mobidb-lite (MOBIDB_LITE); mobidb-lite (MOBIDB_LITE)	---NA---	no GO terms	no GO terms
Cnem001790-RA	157	XP_013075162.1	86.8	260.0	A0A2C9JNT7	86.8	260.0	no hit	P:GO:0106035	P:protein maturation by [4Fe-4S] cluster transfer	IPR002744 (PFAM); IPR034904 (G3DSA:3.30.300.GENE3D); PTHR12377:SF0 (PANTHER); IPR039796 (PANTHER); IPR034904 (SUPERFAMILY)	mitotic spindle-associated MMXD complex subunit MIP18-like	P:GO:0106035	P:protein maturation by [4Fe-4S] cluster transfer
Cnem001791-RA	201	no hit	no hit	no hit	no hit	no hit	no hit	no hit	no GO terms	no GO terms	Coil (COILS); mobidb-lite (MOBIDB_LITE); mobidb-lite (MOBIDB_LITE); mobidb-lite (MOBIDB_LITE); mobidb-lite (MOBIDB_LITE); SIGNAL_PEPTIDE_H_REGION (PHOBIUS); SIGNAL_PEPTIDE_N_REGION (PHOBIUS); SIGNAL_PEPTIDE (PHOBIUS); NON_CYTOPLASMIC_DOMAIN (PHOBIUS); SIGNAL_PEPTIDE_C_REGION (PHOBIUS); SignalP-noTM (SIGNALP_EUK); SignalP-TM (SIGNALP_GRAM_POSITIVE)	---NA---	no GO terms	no GO terms
Cnem001792-RA	190	XP_015778628.1	49.3	126.3	W4YWJ6	46.5	121.3	no hit	no GO terms	no GO terms	IPR036691 (G3DSA:3.60.10.GENE3D)	craniofacial development protein 2-like	no GO terms	no GO terms
Cnem001797-RA	955	WP_078461487.1;OOY49051.1	44.5	376.7	A0A433T6G4	50.4	256.9	no hit	F:GO:0003676; F:GO:0004523	F:nucleic acid binding; F:RNA-DNA hybrid ribonuclease activity	IPR036397 (G3DSA:3.30.420.GENE3D); IPR002156 (PFAM); mobidb-lite (MOBIDB_LITE); PTHR10642 (PANTHER); PTHR10642:SF0 (PANTHER); IPR002156 (PROSITE_PROFILES); IPR002156 (PROSITE_PROFILES); cd09276 (CDD); cd09276 (CDD); IPR012337 (SUPERFAMILY); IPR012337 (SUPERFAMILY)	hypothetical protein BOV88_13545	P:GO:0090502; F:GO:0003676; F:GO:0004523	P:RNA phosphodiester bond hydrolysis, endonucleolytic; F:nucleic acid binding; F:RNA-DNA hybrid ribonuclease activity
Cnem001798-RA	1127	RUS88711.1	43.5	486.9	A0A433U4I6	43.5	486.9	no hit	F:GO:0003676; F:GO:0004523	F:nucleic acid binding; F:RNA-DNA hybrid ribonuclease activity	IPR036397 (G3DSA:3.30.420.GENE3D); IPR002156 (PFAM); IPR005135 (PFAM); IPR000477 (PFAM); IPR036691 (G3DSA:3.60.10.GENE3D); PTHR19446:SF425 (PANTHER); PTHR19446 (PANTHER); NON_CYTOPLASMIC_DOMAIN (PHOBIUS); TRANSMEMBRANE (PHOBIUS); CYTOPLASMIC_DOMAIN (PHOBIUS); IPR000477 (PROSITE_PROFILES); IPR002156 (PROSITE_PROFILES); cd01650 (CDD); cd09276 (CDD); IPR036691 (SUPERFAMILY); IPR012337 (SUPERFAMILY);…	hypothetical protein EGW08_003526	P:GO:0090502; F:GO:0003676; F:GO:0004523	P:RNA phosphodiester bond hydrolysis, endonucleolytic; F:nucleic acid binding; F:RNA-DNA hybrid ribonuclease activity
Cnem001803-RA	150	no hit	no hit	no hit	no hit	no hit	no hit	no hit	no GO terms	no GO terms	TRANSMEMBRANE (PHOBIUS); CYTOPLASMIC_DOMAIN (PHOBIUS); TRANSMEMBRANE (PHOBIUS); CYTOPLASMIC_DOMAIN (PHOBIUS); NON_CYTOPLASMIC_DOMAIN (PHOBIUS); SignalP-noTM (SIGNALP_EUK)	---NA---	no GO terms	no GO terms
Cnem001805-RA	303	PNF30022.1	67.0	120.9	A0A2J7QN52	67.0	120.9	no hit	no GO terms	no GO terms	CYTOPLASMIC_DOMAIN (PHOBIUS); CYTOPLASMIC_DOMAIN (PHOBIUS); NON_CYTOPLASMIC_DOMAIN (PHOBIUS); TRANSMEMBRANE (PHOBIUS); NON_CYTOPLASMIC_DOMAIN (PHOBIUS); TRANSMEMBRANE (PHOBIUS); TRANSMEMBRANE (PHOBIUS)	hypothetical protein B7P43_G05833	no GO terms	no GO terms
Cnem001807-RA	213	RUS75316.1	31.2	72.0	A0A3S0ZU31	31.2	72.0	no hit	no IPS match	no IPS match	no IPS match	hypothetical protein EGW08_016905	no GO terms	no GO terms
Cnem001812-RA	1906	RUS85319.1	47.7	1156.4	A0A3S1BCT8	47.7	1156.4	K14856	P:GO:0000055; P:GO:0030036; P:GO:0042273; F:GO:0003676; F:GO:0004523	P:ribosomal large subunit export from nucleus; P:actin cytoskeleton organization; P:ribosomal large subunit biogenesis; F:nucleic acid binding; F:RNA-DNA hybrid ribonuclease activity	IPR036691 (G3DSA:3.60.10.GENE3D); IPR036397 (G3DSA:3.30.420.GENE3D); IPR005135 (PFAM); IPR000477 (PFAM); IPR012977 (PFAM); IPR002156 (PFAM); IPR007949 (PFAM); mobidb-lite (MOBIDB_LITE); mobidb-lite (MOBIDB_LITE); mobidb-lite (MOBIDB_LITE); mobidb-lite (MOBIDB_LITE); mobidb-lite (MOBIDB_LITE); mobidb-lite (MOBIDB_LITE); IPR027312 (PANTHER); IPR000477 (PROSITE_PROFILES); IPR002156 (PROSITE_PROFILES…	hypothetical protein EGW08_006920	P:GO:0090502; F:GO:0003676; F:GO:0004523	P:RNA phosphodiester bond hydrolysis, endonucleolytic; F:nucleic acid binding; F:RNA-DNA hybrid ribonuclease activity
Cnem001816-RA	563	NP_001191484.1;ABY81651.1	77.6	93.6	A0A2C9KA56	74.1	90.5	no hit	F:GO:0005515	F:protein binding	IPR001478 (PFAM); IPR036034 (G3DSA:2.30.42.GENE3D); mobidb-lite (MOBIDB_LITE); mobidb-lite (MOBIDB_LITE); IPR001478 (PROSITE_PROFILES); cd00992 (CDD); IPR036034 (SUPERFAMILY)	hypothetical protein C4D60_Mb10t12010	no GO terms	no GO terms
Cnem001818-RA	720	WP_078461487.1;OOY49051.1	44.8	352.1	A0A3S1ASJ4	40.7	302.0	no hit	F:GO:0003676; F:GO:0004523	F:nucleic acid binding; F:RNA-DNA hybrid ribonuclease activity	IPR036397 (G3DSA:3.30.420.GENE3D); IPR002156 (PFAM); G3DSA:3.30.420.470 (GENE3D); PTHR10642 (PANTHER); IPR002156 (PROSITE_PROFILES); cd09276 (CDD); IPR012337 (SUPERFAMILY)	hypothetical protein	no GO terms	no GO terms
Cnem001819-RA	400	RUS88711.1	42.5	98.6	A0A3S2L0R7	33.3	74.7	no hit	F:GO:0003676; F:GO:0004523	F:nucleic acid binding; F:RNA-DNA hybrid ribonuclease activity	IPR036397 (G3DSA:3.30.420.GENE3D); IPR002156 (PFAM); mobidb-lite (MOBIDB_LITE); mobidb-lite (MOBIDB_LITE); mobidb-lite (MOBIDB_LITE); mobidb-lite (MOBIDB_LITE); PTHR47027:SF6 (PANTHER); PTHR47027 (PANTHER); IPR002156 (PROSITE_PROFILES); IPR012337 (SUPERFAMILY)	hypothetical protein EGW08_002896	F:GO:0005524; C:GO:0016021	F:ATP binding; C:integral component of membrane
Cnem001823-RA	987	WP_078461487.1;OOY49051.1	45.3	525.0	A0A3S1ASJ4	37.9	406.0	no hit	F:GO:0003676; F:GO:0004523	F:nucleic acid binding; F:RNA-DNA hybrid ribonuclease activity	IPR002156 (PFAM); IPR036397 (G3DSA:3.30.420.GENE3D); IPR000477 (PFAM); mobidb-lite (MOBIDB_LITE); mobidb-lite (MOBIDB_LITE); mobidb-lite (MOBIDB_LITE); mobidb-lite (MOBIDB_LITE); mobidb-lite (MOBIDB_LITE); mobidb-lite (MOBIDB_LITE); mobidb-lite (MOBIDB_LITE); PTHR10642:SF23 (PANTHER); PTHR10642 (PANTHER); IPR000477 (PROSITE_PROFILES); IPR002156 (PROSITE_PROFILES); cd09276 (CDD); IPR012337 (SUPERF…	hypothetical protein	no GO terms	no GO terms
Cnem001825-RA	320	XP_013069747.1	58.8	361.7	A0A2C9LCK8	58.8	361.7	no hit	no GO terms	no GO terms	G3DSA:1.10.533.10 (GENE3D); IPR011029 (SUPERFAMILY)	PREDICTED: uncharacterized protein LOC106057192	P:GO:0042981	P:regulation of apoptotic process
Cnem001827-RA	1046	RUS90826.1	40.2	582.8	A0A3S1I286	40.2	582.8	no hit	no GO terms	no GO terms	IPR029281 (PFAM); IPR000477 (PFAM); mobidb-lite (MOBIDB_LITE); mobidb-lite (MOBIDB_LITE); mobidb-lite (MOBIDB_LITE); mobidb-lite (MOBIDB_LITE); mobidb-lite (MOBIDB_LITE); PTHR23093:SF18 (PANTHER); PTHR23093:SF18 (PANTHER); PTHR23093 (PANTHER); PTHR23093 (PANTHER)	hypothetical protein EGW08_001445	no GO terms	no GO terms
Cnem001830-RA	281	RUS74613.1	45.9	283.1	A0A433SZ72	45.9	283.1	K09651	F:GO:0004252; C:GO:0016021	F:serine-type endopeptidase activity; C:integral component of membrane	IPR022764 (PFAM); IPR035952 (G3DSA:1.20.1540.GENE3D); mobidb-lite (MOBIDB_LITE); mobidb-lite (MOBIDB_LITE); PTHR43066 (PANTHER); PTHR43066:SF1 (PANTHER); IPR003903 (PROSITE_PROFILES); SSF144091 (SUPERFAMILY)	hypothetical protein EGW08_017617	P:GO:0006508; F:GO:0004252; C:GO:0016020; C:GO:0016021	P:proteolysis; F:serine-type endopeptidase activity; C:membrane; C:integral component of membrane
Cnem001837-RA	1144	RUS88711.1	43.7	464.2	A0A433U4I6	43.7	464.2	no hit	F:GO:0003676; F:GO:0004523	F:nucleic acid binding; F:RNA-DNA hybrid ribonuclease activity	IPR000477 (PFAM); IPR005135 (PFAM); IPR036691 (G3DSA:3.60.10.GENE3D); IPR036397 (G3DSA:3.30.420.GENE3D); IPR002156 (PFAM); PTHR19446 (PANTHER); PTHR19446:SF427 (PANTHER); IPR002156 (PROSITE_PROFILES); cd01650 (CDD); IPR036691 (SUPERFAMILY); IPR012337 (SUPERFAMILY)	hypothetical protein EGW08_003526	P:GO:0090502; F:GO:0003676; F:GO:0004523	P:RNA phosphodiester bond hydrolysis, endonucleolytic; F:nucleic acid binding; F:RNA-DNA hybrid ribonuclease activity
Cnem001840-RA	495	RUS74613.1	54.1	166.4	A0A433SZ72	54.1	166.4	no hit	F:GO:0004252; C:GO:0016021	F:serine-type endopeptidase activity; C:integral component of membrane	IPR022764 (PFAM); IPR035952 (G3DSA:1.20.1540.GENE3D); PTHR43066 (PANTHER); PTHR43066:SF1 (PANTHER); SSF144091 (SUPERFAMILY)	hypothetical protein EGW08_017617	P:GO:0006508; F:GO:0004252; C:GO:0016021	P:proteolysis; F:serine-type endopeptidase activity; C:integral component of membrane
Cnem001842-RA	366	XP_022296330.1	40.3	268.9	A0A433UD90	37.9	238.0	no hit	F:GO:0003676; F:GO:0004523	F:nucleic acid binding; F:RNA-DNA hybrid ribonuclease activity	IPR036397 (G3DSA:3.30.420.GENE3D); IPR036397 (G3DSA:3.30.420.GENE3D); PTHR10642:SF0 (PANTHER); PTHR10642 (PANTHER); IPR002156 (PROSITE_PROFILES); cd09276 (CDD); IPR012337 (SUPERFAMILY)	hypothetical protein	no GO terms	no GO terms
Cnem001843-RA	103	XP_005099366.1	91.6	177.9	A0A3S1BX53	86.5	176.8	K12751	F:GO:0005509	F:calcium ion binding	G3DSA:1.10.238.10 (GENE3D); IPR002048 (PFAM); IPR029655 (PTHR23048:PANTHER); PTHR23048 (PANTHER); IPR002048 (PROSITE_PROFILES); IPR002048 (CDD); IPR011992 (SUPERFAMILY)	hypothetical protein EGW08_015049, partial	F:GO:0005509	F:calcium ion binding
Cnem001847-RA	771	XP_005100360.1	81.1	467.6	A0A2C9KZ29	88.5	459.5	K17498	C:GO:0005634	C:nucleus	IPR035441 (G3DSA:1.20.930.GENE3D); IPR017923 (PFAM); mobidb-lite (MOBIDB_LITE); mobidb-lite (MOBIDB_LITE); mobidb-lite (MOBIDB_LITE); mobidb-lite (MOBIDB_LITE); mobidb-lite (MOBIDB_LITE); mobidb-lite (MOBIDB_LITE); mobidb-lite (MOBIDB_LITE); mobidb-lite (MOBIDB_LITE); mobidb-lite (MOBIDB_LITE); mobidb-lite (MOBIDB_LITE); mobidb-lite (MOBIDB_LITE); mobidb-lite (MOBIDB_LITE); PTHR46010 (PANTHER); I…	protein IWS1 homolog isoform X1	C:GO:0005634	C:nucleus
Cnem001849-RA	92	no hit	no hit	no hit	no hit	no hit	no hit	no hit	no IPS match	no IPS match	no IPS match	---NA---	no GO terms	no GO terms
Cnem001851-RA	289	XP_005110380.1	88.9	492.3	A0A2C9JX84	86.4	486.5	K15161	P:GO:0006357; F:GO:0016538; C:GO:0016592; C:GO:0042025	P:regulation of transcription by RNA polymerase II; F:cyclin-dependent protein serine/threonine kinase regulator activity; C:mediator complex; C:host cell nucleus	IPR006671 (PFAM); G3DSA:1.10.472.10 (GENE3D); G3DSA:1.10.472.10 (GENE3D); IPR031658 (PFAM); PIRSF028758 (PIRSF); mobidb-lite (MOBIDB_LITE); mobidb-lite (MOBIDB_LITE); IPR028367 (PTHR10026:PANTHER); IPR043198 (PANTHER); IPR013763 (CDD); IPR013763 (CDD); IPR036915 (SUPERFAMILY); IPR036915 (SUPERFAMILY)	PREDICTED: cyclin-C-like	P:GO:0000079; P:GO:0006357; F:GO:0016538; C:GO:0016592; C:GO:0042025	P:regulation of cyclin-dependent protein serine/threonine kinase activity; P:regulation of transcription by RNA polymerase II; F:cyclin-dependent protein serine/threonine kinase regulator activity; C:mediator complex; C:host cell nucleus
Cnem001861-RA	51	no hit	no hit	no hit	no hit	no hit	no hit	no hit	no IPS match	no IPS match	no IPS match	---NA---	no GO terms	no GO terms
Cnem001862-RA	412	XP_025092756.1	56.1	473.8	A0A3S1B9P2	54.2	460.7	no hit	P:GO:0006260; F:GO:0000166; F:GO:0003677; F:GO:0003887	P:DNA replication; F:nucleotide binding; F:DNA binding; F:DNA-directed DNA polymerase activity	IPR004868 (PFAM); PTHR31511:SF12 (PANTHER); PTHR31511 (PANTHER)	uncharacterized protein LOC112563184	no GO terms	no GO terms
Cnem001863-RA	597	RUS88711.1	43.8	264.6	A0A433U4I6	43.8	264.6	no hit	no GO terms	no GO terms	IPR000477 (PFAM); PTHR19446 (PANTHER); PTHR19446:SF427 (PANTHER); IPR000477 (PROSITE_PROFILES); IPR000477 (PROSITE_PROFILES); cd01650 (CDD); IPR043502 (SUPERFAMILY); IPR012337 (SUPERFAMILY)	hypothetical protein EGW08_003526	P:GO:0090502; F:GO:0003676; F:GO:0004523	P:RNA phosphodiester bond hydrolysis, endonucleolytic; F:nucleic acid binding; F:RNA-DNA hybrid ribonuclease activity
Cnem001864-RA	643	WP_078461487.1;OOY49051.1	44.2	534.6	A0A3S1BCT8	40.2	465.7	no hit	F:GO:0003676; F:GO:0004523	F:nucleic acid binding; F:RNA-DNA hybrid ribonuclease activity	IPR002156 (PFAM); IPR000477 (PFAM); IPR036397 (G3DSA:3.30.420.GENE3D); PTHR33332 (PANTHER); PTHR33332:SF6 (PANTHER); IPR000477 (PROSITE_PROFILES); IPR002156 (PROSITE_PROFILES); cd09276 (CDD); cd01650 (CDD); IPR043502 (SUPERFAMILY); IPR012337 (SUPERFAMILY)	hypothetical protein, partial	no GO terms	no GO terms
Cnem001874-RA	400	RUS80949.1	93.3	745.0	A0A3S1A2G3	93.3	745.0	K03257	F:GO:0003676; F:GO:0005524	F:nucleic acid binding; F:ATP binding	G3DSA:3.40.50.300 (GENE3D); IPR001650 (PFAM); IPR011545 (PFAM); G3DSA:3.40.50.300 (GENE3D); PTHR24031:SF623 (PANTHER); PTHR24031 (PANTHER); IPR014001 (PROSITE_PROFILES); IPR001650 (PROSITE_PROFILES); IPR014014 (PROSITE_PROFILES); cd18046 (CDD); cd18787 (CDD); IPR027417 (SUPERFAMILY); IPR027417 (SUPERFAMILY)	hypothetical protein EGW08_011300	F:GO:0003676; F:GO:0004386; F:GO:0005524	F:nucleic acid binding; F:helicase activity; F:ATP binding
Cnem001876-RA	164	no hit	no hit	no hit	no hit	no hit	no hit	no hit	F:GO:0003676	F:nucleic acid binding	IPR036397 (G3DSA:3.30.420.GENE3D); IPR012337 (SUPERFAMILY)	hypothetical protein	no GO terms	no GO terms
Cnem001878-RA	671	RUS85319.1	42.2	474.9	A0A3S1BCT8	42.2	474.9	no hit	F:GO:0003676; F:GO:0004523	F:nucleic acid binding; F:RNA-DNA hybrid ribonuclease activity	IPR002156 (PFAM); IPR036397 (G3DSA:3.30.420.GENE3D); IPR000477 (PFAM); PTHR19446 (PANTHER); PTHR19446:SF427 (PANTHER); IPR000477 (PROSITE_PROFILES); IPR002156 (PROSITE_PROFILES); cd09276 (CDD); cd01650 (CDD); IPR043502 (SUPERFAMILY); IPR012337 (SUPERFAMILY)	hypothetical protein	no GO terms	no GO terms
Cnem001880-RA	195	XP_013070784.1;XP_013070791.1;XP_013070797.1;XP_013070803.1	37.3	78.2	A0A2C9LKG3	37.3	78.2	no hit	no GO terms	no GO terms	G3DSA:2.30.30.40 (GENE3D); mobidb-lite (MOBIDB_LITE); mobidb-lite (MOBIDB_LITE)	PREDICTED: uncharacterized protein LOC106057959 isoform X2	no GO terms	no GO terms
Cnem001888-RA	1297	XP_032241703.1	52.3	605.1	K7EZK3	57.4	557.4	no hit	F:GO:0003676; F:GO:0004523	F:nucleic acid binding; F:RNA-DNA hybrid ribonuclease activity	IPR036397 (G3DSA:3.30.420.GENE3D); IPR002156 (PFAM); IPR000477 (PFAM); PTHR19446 (PANTHER); PTHR19446:SF411 (PANTHER); TRANSMEMBRANE (PHOBIUS); NON_CYTOPLASMIC_DOMAIN (PHOBIUS); CYTOPLASMIC_DOMAIN (PHOBIUS); IPR000477 (PROSITE_PROFILES); IPR000477 (PROSITE_PROFILES); IPR002156 (PROSITE_PROFILES); cd01650 (CDD); cd01650 (CDD); cd09276 (CDD); IPR043502 (SUPERFAMILY); IPR043502 (SUPERFAMILY); IPR012…	uncharacterized protein LOC116620165	no GO terms	no GO terms
Cnem001891-RA	291	XP_012941316.1	35.0	157.1	no hit	no hit	no hit	no hit	F:GO:0003676; F:GO:0004523	F:nucleic acid binding; F:RNA-DNA hybrid ribonuclease activity	IPR002156 (PFAM); IPR036397 (G3DSA:3.30.420.GENE3D); mobidb-lite (MOBIDB_LITE); PTHR10642:SF0 (PANTHER); PTHR10642 (PANTHER); IPR002156 (PROSITE_PROFILES); IPR012337 (SUPERFAMILY)	hypothetical protein EGW08_008040	P:GO:0090502; F:GO:0003676; F:GO:0004523	P:RNA phosphodiester bond hydrolysis, endonucleolytic; F:nucleic acid binding; F:RNA-DNA hybrid ribonuclease activity
Cnem001904-RA	258	KAF0295353.1	28.1	63.2	no hit	no hit	no hit	no hit	no GO terms	no GO terms	IPR000477 (PFAM)	PREDICTED: uncharacterized protein LOC106011589	no GO terms	no GO terms
Cnem001911-RA	818	XP_013077789.1	67.4	894.8	A0A2C9JHV5	66.3	885.2	K05725	P:GO:0006468; P:GO:0007172; F:GO:0004672; F:GO:0004713; F:GO:0005524; C:GO:0005925	P:protein phosphorylation; P:signal complex assembly; F:protein kinase activity; F:protein tyrosine kinase activity; F:ATP binding; C:focal adhesion	Coil (COILS); Coil (COILS); IPR001245 (PRINTS); IPR020635 (SMART); G3DSA:1.10.510.10 (GENE3D); IPR005189 (PFAM); IPR001245 (PFAM); G3DSA:1.20.120.330 (GENE3D); G3DSA:3.30.200.20 (GENE3D); mobidb-lite (MOBIDB_LITE); mobidb-lite (MOBIDB_LITE); mobidb-lite (MOBIDB_LITE); mobidb-lite (MOBIDB_LITE); mobidb-lite (MOBIDB_LITE); mobidb-lite (MOBIDB_LITE); mobidb-lite (MOBIDB_LITE); mobidb-lite (MOBIDB_LI…	focal adhesion kinase 1-like isoform X3	P:GO:0007172; P:GO:0018108; F:GO:0004713; F:GO:0005524; C:GO:0005856; C:GO:0005925	P:signal complex assembly; P:peptidyl-tyrosine phosphorylation; F:protein tyrosine kinase activity; F:ATP binding; C:cytoskeleton; C:focal adhesion
Cnem001917-RA	183	XP_012944778.1	51.7	137.1	A0A433U8M4	46.4	125.9	no hit	no GO terms	no GO terms	Coil (COILS); Coil (COILS); Coil (COILS); PTHR19306 (PANTHER)	structural maintenance of chromosomes protein 6-like	no GO terms	no GO terms
Cnem001918-RA	739	RUS90138.1	59.8	826.6	A0A433U8M4	59.8	826.6	K22804	P:GO:0051276; F:GO:0005515; F:GO:0005524; C:GO:0005694	P:chromosome organization; F:protein binding; F:ATP binding; C:chromosome	Coil (COILS); Coil (COILS); Coil (COILS); Coil (COILS); Coil (COILS); Coil (COILS); G3DSA:3.40.50.300 (GENE3D); PTHR19306 (PANTHER); cd03276 (CDD); IPR027417 (SUPERFAMILY); IPR036277 (SUPERFAMILY); SSF101447 (SUPERFAMILY); SSF57997 (SUPERFAMILY)	hypothetical protein EGW08_002105	P:GO:0051276; F:GO:0005524; C:GO:0005694	P:chromosome organization; F:ATP binding; C:chromosome
Cnem001919-RA	237	XP_023963872.1	58.2	139.4	A0A0L8GS27	63.2	135.2	no hit	no GO terms	no GO terms	PTHR47027:SF5 (PANTHER); PTHR47027 (PANTHER)	hypothetical protein OCBIM_22029129mg	no GO terms	no GO terms
Cnem001921-RA	77	XP_005099570.1	67.7	108.2	A0A2C9JUL4	52.3	79.3	no hit	no IPS match	no IPS match	no IPS match	meiotically up-regulated gene 158 protein-like	no GO terms	no GO terms
Cnem001923-RA	172	XP_005099570.1	68.8	231.5	A0A2C9JUL4	58.6	199.1	no hit	F:GO:0008168	F:methyltransferase activity	IPR013216 (PFAM); G3DSA:3.40.50.150 (GENE3D); cd02440 (CDD); IPR029063 (SUPERFAMILY)	meiotically up-regulated gene 158 protein-like	no GO terms	no GO terms
Cnem001924-RA	196	XP_005099570.1	82.2	355.9	A0A2C9JUL4	81.4	347.4	no hit	no GO terms	no GO terms	IPR005532 (PFAM); IPR042095 (G3DSA:3.90.1580.GENE3D); PTHR23150:SF24 (PANTHER); PTHR23150 (PANTHER); IPR016187 (SUPERFAMILY)	meiotically up-regulated gene 158 protein-like	no GO terms	no GO terms
Cnem001934-RA	280	XP_013079272.1;XP_013079273.1;XP_013079274.1	76.2	285.0	A0A2C9JRK4	76.2	285.0	K19872	no GO terms	no GO terms	IPR007074 (PFAM); PTHR15407:SF28 (PANTHER); IPR009644 (PANTHER)	PREDICTED: fukutin-like	C:GO:0016021	C:integral component of membrane
Cnem001936-RA	631	XP_013079276.1	62.0	557.4	A0A2C9LZX2	62.1	554.3	K10265	F:GO:0005515	F:protein binding	IPR001680 (SMART); IPR001810 (SMART); G3DSA:1.20.1280.50 (GENE3D); IPR015943 (G3DSA:2.130.10.GENE3D); IPR015943 (G3DSA:2.130.10.GENE3D); IPR001680 (PFAM); PTHR19855:SF15 (PANTHER); PTHR19855 (PANTHER); IPR001810 (PROSITE_PROFILES); IPR036047 (SUPERFAMILY); IPR036322 (SUPERFAMILY)	F-box/WD repeat-containing protein 9-like isoform X2	no GO terms	no GO terms
Cnem001938-RA	682	XP_005101679.1	34.3	358.6	A0A2C9KSW7	31.8	328.6	K07819	P:GO:0006486; C:GO:0016020	P:protein glycosylation; C:membrane	IPR002659 (PFAM); mobidb-lite (MOBIDB_LITE); mobidb-lite (MOBIDB_LITE); IPR002659 (PANTHER); PTHR11214:SF148 (PANTHER)	PREDICTED: uncharacterized protein LOC101848981	no GO terms	no GO terms
Cnem001940-RA	1248	XP_013089193.1	87.4	2167.1	A0A2C9JYN1	87.4	2167.1	K20178	P:GO:0006886; P:GO:0016192; F:GO:0005515	P:intracellular protein transport; P:vesicle-mediated transport; F:protein binding	IPR001841 (SMART); IPR015943 (G3DSA:2.130.10.GENE3D); IPR025941 (PFAM); IPR013083 (G3DSA:3.30.40.GENE3D); IPR000547 (PFAM); PTHR42968 (PANTHER); PTHR42968:SF11 (PANTHER); SIGNAL_PEPTIDE_N_REGION (PHOBIUS); NON_CYTOPLASMIC_DOMAIN (PHOBIUS); SIGNAL_PEPTIDE_C_REGION (PHOBIUS); SIGNAL_PEPTIDE_H_REGION (PHOBIUS); SIGNAL_PEPTIDE (PHOBIUS); IPR001680 (PROSITE_PROFILES); IPR001841 (PROSITE_PROFILES); IPR…	vacuolar protein sorting-associated protein 8 homolog	F:GO:0046872	F:metal ion binding
Cnem001945-RA	167	no hit	no hit	no hit	no hit	no hit	no hit	no hit	no IPS match	no IPS match	no IPS match	---NA---	no GO terms	no GO terms
Cnem001946-RA	254	RUS83350.1	55.1	272.3	A0A433TPA8	55.1	272.3	no hit	no IPS match	no IPS match	no IPS match	hypothetical protein EGW08_008897	no GO terms	no GO terms
Cnem001947-RA	605	XP_013089194.1;XP_013089195.1	51.9	574.7	A0A2C9KNA3	51.9	574.7	no hit	no GO terms	no GO terms	IPR025946 (PFAM); mobidb-lite (MOBIDB_LITE); mobidb-lite (MOBIDB_LITE); mobidb-lite (MOBIDB_LITE)	PREDICTED: uncharacterized protein LOC106073236	no GO terms	no GO terms
Cnem001952-RA	1195	KAF0305860.1	32.1	541.6	A0A433U4I6	43.4	513.5	no hit	F:GO:0003676; F:GO:0004523	F:nucleic acid binding; F:RNA-DNA hybrid ribonuclease activity	IPR002156 (PFAM); IPR036397 (G3DSA:3.30.420.GENE3D); IPR000477 (PFAM); IPR036691 (G3DSA:3.60.10.GENE3D); IPR005135 (PFAM); mobidb-lite (MOBIDB_LITE); mobidb-lite (MOBIDB_LITE); PTHR19446:SF427 (PANTHER); PTHR19446 (PANTHER); IPR000477 (PROSITE_PROFILES); IPR002156 (PROSITE_PROFILES); cd01650 (CDD); cd09276 (CDD); IPR036691 (SUPERFAMILY); IPR012337 (SUPERFAMILY); IPR043502 (SUPERFAMILY)	hypothetical protein EGW08_003526	P:GO:0090502; F:GO:0003676; F:GO:0004523	P:RNA phosphodiester bond hydrolysis, endonucleolytic; F:nucleic acid binding; F:RNA-DNA hybrid ribonuclease activity
Cnem001953-RA	173	XP_005112657.2	78.6	240.7	A0A2C9JYN3	55.2	165.2	no hit	no GO terms	no GO terms	mobidb-lite (MOBIDB_LITE); mobidb-lite (MOBIDB_LITE); mobidb-lite (MOBIDB_LITE); mobidb-lite (MOBIDB_LITE); PTHR12449:SF22 (PANTHER); IPR039788 (PANTHER)	nucleolar protein 4-like isoform X3	no GO terms	no GO terms
Cnem001954-RA	230	CAB3263295.1	34.9	75.9	H3B2Y3	32.2	85.5	no hit	no GO terms	no GO terms	Coil (COILS); mobidb-lite (MOBIDB_LITE); mobidb-lite (MOBIDB_LITE)	---NA---	no GO terms	no GO terms
Cnem001955-RA	220	RUS83352.1	87.9	328.9	A0A433TP43	87.9	328.9	no hit	no GO terms	no GO terms	mobidb-lite (MOBIDB_LITE); mobidb-lite (MOBIDB_LITE); mobidb-lite (MOBIDB_LITE); PTHR12449:SF22 (PANTHER); IPR039788 (PANTHER)	hypothetical protein EGW08_008899	no GO terms	no GO terms
Cnem001966-RA	1636	KAF0290124.1	29.7	217.2	A0A2T7PMN6	27.5	80.9	no hit	P:GO:0042981; F:GO:0003676; F:GO:0004523	P:regulation of apoptotic process; F:nucleic acid binding; F:RNA-DNA hybrid ribonuclease activity	IPR036397 (G3DSA:3.30.420.GENE3D); IPR036834 (G3DSA:1.10.437.GENE3D); IPR002156 (PFAM); PTHR33332 (PANTHER); PTHR33332:SF6 (PANTHER); IPR002156 (PROSITE_PROFILES); IPR002475 (PROSITE_PROFILES); cd09276 (CDD); IPR036834 (SUPERFAMILY); IPR012337 (SUPERFAMILY)	hypothetical protein EGW08_003526	P:GO:0090502; F:GO:0003676; F:GO:0004523	P:RNA phosphodiester bond hydrolysis, endonucleolytic; F:nucleic acid binding; F:RNA-DNA hybrid ribonuclease activity
Cnem001970-RA	635	BAC82613.1	35.1	247.7	A0A0G2KTU9	38.1	243.8	no hit	no GO terms	no GO terms	Coil (COILS); IPR000477 (PFAM); mobidb-lite (MOBIDB_LITE); mobidb-lite (MOBIDB_LITE); mobidb-lite (MOBIDB_LITE); mobidb-lite (MOBIDB_LITE); mobidb-lite (MOBIDB_LITE); mobidb-lite (MOBIDB_LITE); mobidb-lite (MOBIDB_LITE); mobidb-lite (MOBIDB_LITE); PTHR19446 (PANTHER); PTHR19446:SF419 (PANTHER); IPR000477 (PROSITE_PROFILES); cd01650 (CDD); IPR043502 (SUPERFAMILY)	hypothetical protein DPX16_23722	no GO terms	no GO terms
Cnem001981-RA	520	XP_005092341.1	82.2	805.4	A0A1S3K4X2	71.5	704.9	no hit	F:GO:0003743; C:GO:0005737; C:GO:0005852	F:translation initiation factor activity; C:cytoplasm; C:eukaryotic translation initiation factor 3 complex	IPR007783 (PIRSF); IPR007783 (PFAM); mobidb-lite (MOBIDB_LITE); mobidb-lite (MOBIDB_LITE); IPR007783 (PANTHER); IPR007783 (HAMAP)	eukaryotic translation initiation factor 3 subunit D-like	no GO terms	no GO terms
Cnem001983-RA	987	VEN57771.1	42.3	748.4	A0A2A4JBK9	39.1	674.5	no hit	no GO terms	no GO terms	Coil (COILS); IPR005135 (PFAM); IPR000477 (PFAM); IPR036691 (G3DSA:3.60.10.GENE3D); mobidb-lite (MOBIDB_LITE); PTHR19446 (PANTHER); PTHR19446:SF427 (PANTHER); IPR000477 (PROSITE_PROFILES); cd09076 (CDD); cd01650 (CDD); IPR036691 (SUPERFAMILY); IPR043502 (SUPERFAMILY)	unnamed protein product	no GO terms	no GO terms
Cnem001986-RA	151	no hit	no hit	no hit	no hit	no hit	no hit	no hit	no IPS match	no IPS match	no IPS match	---NA---	no GO terms	no GO terms
Cnem001997-RA	266	RUS90481.1	34.2	104.0	A0A3S1I1N9	34.2	104.0	no hit	no GO terms	no GO terms	IPR012337 (SUPERFAMILY)	hypothetical protein EGW08_003526	P:GO:0090502; F:GO:0003676; F:GO:0004523	P:RNA phosphodiester bond hydrolysis, endonucleolytic; F:nucleic acid binding; F:RNA-DNA hybrid ribonuclease activity
Cnem002007-RA	255	RUS88711.1	38.4	113.6	A0A433U4I6	38.4	113.6	no hit	no GO terms	no GO terms	Coil (COILS); IPR000477 (PFAM); mobidb-lite (MOBIDB_LITE); mobidb-lite (MOBIDB_LITE); mobidb-lite (MOBIDB_LITE); PTHR33332:SF6 (PANTHER); PTHR33332 (PANTHER)	hypothetical protein EGW08_003526	P:GO:0090502; F:GO:0003676; F:GO:0004523	P:RNA phosphodiester bond hydrolysis, endonucleolytic; F:nucleic acid binding; F:RNA-DNA hybrid ribonuclease activity
Cnem002010-RA	614	RUS68506.1	45.3	502.3	A0A3S0Z3I7	45.3	502.3	no hit	no GO terms	no GO terms	IPR000477 (PFAM); PTHR47027 (PANTHER); PTHR47027:SF5 (PANTHER); IPR000477 (PROSITE_PROFILES); cd01650 (CDD)	craniofacial development protein 2-like	no GO terms	no GO terms
Cnem002013-RA	284	no hit	no hit	no hit	no hit	no hit	no hit	no hit	no IPS match	no IPS match	no IPS match	hypothetical protein EGW08_003526	P:GO:0090502; F:GO:0003676; F:GO:0004523	P:RNA phosphodiester bond hydrolysis, endonucleolytic; F:nucleic acid binding; F:RNA-DNA hybrid ribonuclease activity
Cnem002015-RA	373	RUS88711.1	43.8	217.2	A0A433U4I6	43.8	217.2	no hit	no GO terms	no GO terms	IPR000477 (PFAM); PTHR33332:SF6 (PANTHER); PTHR33332 (PANTHER); IPR000477 (PROSITE_PROFILES)	hypothetical protein EGW08_003526	P:GO:0090502; F:GO:0003676; F:GO:0004523	P:RNA phosphodiester bond hydrolysis, endonucleolytic; F:nucleic acid binding; F:RNA-DNA hybrid ribonuclease activity
Cnem002029-RA	596	RUS70916.1	37.7	462.6	A0A3S1ASJ4	37.7	462.6	no hit	F:GO:0003676; F:GO:0004523	F:nucleic acid binding; F:RNA-DNA hybrid ribonuclease activity	IPR036397 (G3DSA:3.30.420.GENE3D); IPR002156 (PFAM); IPR000477 (PFAM); PTHR19446 (PANTHER); PTHR19446:SF427 (PANTHER); IPR000477 (PROSITE_PROFILES); IPR002156 (PROSITE_PROFILES); cd01650 (CDD); cd09276 (CDD); IPR043502 (SUPERFAMILY); IPR012337 (SUPERFAMILY)	hypothetical protein EGW08_010478	P:GO:0090502; F:GO:0003676; F:GO:0004523	P:RNA phosphodiester bond hydrolysis, endonucleolytic; F:nucleic acid binding; F:RNA-DNA hybrid ribonuclease activity
Cnem002039-RA	250	XP_013068510.1	31.4	85.1	A0A2C9KHD3	31.4	85.1	no hit	F:GO:0005515	F:protein binding	G3DSA:2.10.50.10 (GENE3D); mobidb-lite (MOBIDB_LITE); mobidb-lite (MOBIDB_LITE); CYTOPLASMIC_DOMAIN (PHOBIUS); NON_CYTOPLASMIC_DOMAIN (PHOBIUS); TRANSMEMBRANE (PHOBIUS); IPR001368 (PROSITE_PROFILES); cd00185 (CDD)	PREDICTED: uncharacterized protein LOC106056352	C:GO:0016020; C:GO:0016021	C:membrane; C:integral component of membrane
Cnem002041-RA	868	RUS88711.1	39.9	321.6	A0A433U4I6	39.9	321.6	no hit	no GO terms	no GO terms	IPR000477 (PFAM); IPR036691 (G3DSA:3.60.10.GENE3D); PTHR19446 (PANTHER); CYTOPLASMIC_DOMAIN (PHOBIUS); NON_CYTOPLASMIC_DOMAIN (PHOBIUS); TRANSMEMBRANE (PHOBIUS); IPR000477 (PROSITE_PROFILES); IPR043502 (SUPERFAMILY); IPR036691 (SUPERFAMILY)	putative RNA-directed DNA polymerase from transposon BS	P:GO:0006278; P:GO:0090502; F:GO:0003676; F:GO:0003964; F:GO:0004523	P:RNA-dependent DNA biosynthetic process; P:RNA phosphodiester bond hydrolysis, endonucleolytic; F:nucleic acid binding; F:RNA-directed DNA polymerase activity; F:RNA-DNA hybrid ribonuclease activity
Cnem002061-RA	163	no hit	no hit	no hit	no hit	no hit	no hit	no hit	no IPS match	no IPS match	no IPS match	---NA---	no GO terms	no GO terms
Cnem002068-RA	344	NP_001191550.1;AAC28786.1	82.1	373.6	A0A3S1BUP6	82.6	365.2	K04153	P:GO:0007186; F:GO:0004930; C:GO:0016021	P:G protein-coupled receptor signaling pathway; F:G protein-coupled receptor activity; C:integral component of membrane	IPR000276 (PRINTS); G3DSA:1.20.1070.10 (GENE3D); IPR017452 (PFAM); mobidb-lite (MOBIDB_LITE); mobidb-lite (MOBIDB_LITE); PTHR24247 (PANTHER); PTHR24247:SF198 (PANTHER); IPR017452 (PROSITE_PROFILES); cd15331 (CDD); SSF81321 (SUPERFAMILY)	G-protein-coupled 5-hydroxytryptamine receptor	P:GO:0007186; F:GO:0004930; C:GO:0016021	P:G protein-coupled receptor signaling pathway; F:G protein-coupled receptor activity; C:integral component of membrane
Cnem002072-RA	992	XP_013074018.1	54.7	808.1	A0A2C9M6L8	54.7	807.7	K23488	P:GO:0007165	P:signal transduction	IPR000159 (PFAM); G3DSA:3.10.20.90 (GENE3D); IPR011993 (G3DSA:2.30.29.GENE3D); IPR001849 (PFAM); mobidb-lite (MOBIDB_LITE); mobidb-lite (MOBIDB_LITE); mobidb-lite (MOBIDB_LITE); mobidb-lite (MOBIDB_LITE); mobidb-lite (MOBIDB_LITE); mobidb-lite (MOBIDB_LITE); mobidb-lite (MOBIDB_LITE); mobidb-lite (MOBIDB_LITE); mobidb-lite (MOBIDB_LITE); mobidb-lite (MOBIDB_LITE); mobidb-lite (MOBIDB_LITE); mobid…	PREDICTED: uncharacterized protein LOC106060612 isoform X1	P:GO:0007165	P:signal transduction
Cnem002074-RA	170	XP_005100772.1	56.2	94.4	no hit	no hit	no hit	no hit	no GO terms	no GO terms	IPR000477 (PFAM); IPR000477 (PROSITE_PROFILES)	PREDICTED: uncharacterized protein LOC106012672	no GO terms	no GO terms
Cnem002078-RA	197	GCF47419.1	31.0	80.1	H3B2Y3	30.9	81.6	no hit	no GO terms	no GO terms	mobidb-lite (MOBIDB_LITE); mobidb-lite (MOBIDB_LITE); mobidb-lite (MOBIDB_LITE); PTHR47027:SF6 (PANTHER); PTHR47027 (PANTHER)	hypothetical protein parPi_0001351	no GO terms	no GO terms
Cnem002080-RA	594	XP_013084038.1;XP_013084039.1	61.4	674.1	A0A2C9JUQ7	61.4	674.1	K12305	F:GO:0016787	F:hydrolase activity	G3DSA:3.30.420.150 (GENE3D); G3DSA:3.30.420.40 (GENE3D); IPR000407 (PFAM); PTHR11782:SF37 (PANTHER); IPR000407 (PANTHER); cd00012 (CDD)	ectonucleoside triphosphate diphosphohydrolase 7-like	F:GO:0005524; F:GO:0016787; C:GO:0016021	F:ATP binding; F:hydrolase activity; C:integral component of membrane
Cnem002087-RA	599	XP_005103748.1	92.2	997.7	A0A3S1BSI9	92.0	993.8	K02132	P:GO:0015986; P:GO:0046034; P:GO:1902600; F:GO:0005524; F:GO:0032559; F:GO:0046933; C:GO:0045261	P:ATP synthesis coupled proton transport; P:ATP metabolic process; P:proton transmembrane transport; F:ATP binding; F:adenyl ribonucleotide binding; F:proton-transporting ATP synthase activity, rotational mechanism; C:proton-transporting ATP synthase complex, catalytic core F(1)	IPR000194 (PFAM); IPR004100 (PFAM); IPR038376 (G3DSA:1.20.150.GENE3D); IPR000793 (PFAM); G3DSA:3.40.50.300 (GENE3D); IPR023366 (G3DSA:2.40.30.GENE3D); IPR005294 (TIGRFAM); PTHR43089 (PANTHER); PTHR43089:SF6 (PANTHER); IPR005294 (HAMAP); cd18116 (CDD); IPR033732 (CDD); cd18113 (CDD); IPR027417 (SUPERFAMILY); IPR036121 (SUPERFAMILY); SSF47917 (SUPERFAMILY)	ATP synthase subunit alpha, mitochondrial	no GO terms	no GO terms
Cnem002088-RA	379	XP_012941128.1;XP_012941129.1	25.7	62.0	no hit	no hit	no hit	no hit	no GO terms	no GO terms	mobidb-lite (MOBIDB_LITE); mobidb-lite (MOBIDB_LITE); mobidb-lite (MOBIDB_LITE); mobidb-lite (MOBIDB_LITE)	PREDICTED: uncharacterized protein LOC106013205 isoform X3	no GO terms	no GO terms
Cnem002091-RA	298	XP_005095628.1;XP_005095629.1;XP_005095630.1;XP_012936398.1	45.5	240.4	A0A2C9KR16	41.7	221.9	no hit	P:GO:0007186; F:GO:0004930; C:GO:0016021	P:G protein-coupled receptor signaling pathway; F:G protein-coupled receptor activity; C:integral component of membrane	IPR000276 (PRINTS); G3DSA:1.20.1070.10 (GENE3D); G3DSA:1.20.1070.10 (GENE3D); mobidb-lite (MOBIDB_LITE); mobidb-lite (MOBIDB_LITE); PTHR24243 (PANTHER); cd00637 (CDD); SSF81321 (SUPERFAMILY)	atypical chemokine receptor 3-like	no GO terms	no GO terms
Cnem002095-RA	434	NP_001298225.1;AJT59484.1	87.7	370.5	A0A0H3VB18	87.7	370.5	K11590	F:GO:0003676; F:GO:0003677; F:GO:0004523	F:nucleic acid binding; F:DNA binding; F:RNA-DNA hybrid ribonuclease activity	IPR025884 (PFAM); G3DSA:3.30.890.10 (GENE3D); IPR032343 (PFAM); IPR036397 (G3DSA:3.30.420.GENE3D); PTHR12396:SF33 (PANTHER); PTHR12396 (PANTHER); IPR002156 (PROSITE_PROFILES); IPR012337 (SUPERFAMILY); IPR016177 (SUPERFAMILY)	methyl-CpG-binding domain protein 2-like	F:GO:0008327; C:GO:0016581; C:GO:0042025	F:methyl-CpG binding; C:NuRD complex; C:host cell nucleus
Cnem002103-RA	391	XP_012935960.1	58.8	265.8	A0A2C9KJV1	59.6	260.8	no hit	no GO terms	no GO terms	mobidb-lite (MOBIDB_LITE); mobidb-lite (MOBIDB_LITE); mobidb-lite (MOBIDB_LITE); mobidb-lite (MOBIDB_LITE); mobidb-lite (MOBIDB_LITE); mobidb-lite (MOBIDB_LITE)	protein glass-like isoform X4	no GO terms	no GO terms
Cnem002107-RA	473	no hit	no hit	no hit	no hit	no hit	no hit	no hit	no GO terms	no GO terms	mobidb-lite (MOBIDB_LITE); mobidb-lite (MOBIDB_LITE); mobidb-lite (MOBIDB_LITE); mobidb-lite (MOBIDB_LITE); mobidb-lite (MOBIDB_LITE); mobidb-lite (MOBIDB_LITE); mobidb-lite (MOBIDB_LITE); mobidb-lite (MOBIDB_LITE)	---NA---	no GO terms	no GO terms
Cnem002117-RA	301	XP_012935171.1	42.4	254.2	A0A433SPC7	42.7	218.8	K22750	F:GO:0008080; F:GO:0016747	F:N-acetyltransferase activity; F:transferase activity, transferring acyl groups other than amino-acyl groups	IPR013653 (PFAM); G3DSA:3.40.630.30 (GENE3D); PTHR20958 (PANTHER); IPR000182 (PROSITE_PROFILES); IPR016181 (SUPERFAMILY)	PREDICTED: uncharacterized protein LOC101854005	no GO terms	no GO terms
Cnem002123-RA	269	XP_013088226.1	73.6	370.5	A0A2C9JXX5	73.6	370.5	no hit	no GO terms	no GO terms	IPR013083 (G3DSA:3.30.40.GENE3D); IPR036987 (G3DSA:2.30.280.GENE3D); IPR003105 (PFAM); mobidb-lite (MOBIDB_LITE); mobidb-lite (MOBIDB_LITE); PTHR14140:SF33 (PANTHER); PTHR14140 (PANTHER); IPR001841 (PROSITE_PROFILES); IPR003105 (PROSITE_PROFILES); cd16613 (CDD); IPR015947 (SUPERFAMILY); SSF57850 (SUPERFAMILY)	E3 ubiquitin-protein ligase UHRF1-like	F:GO:0046872; C:GO:0005634	F:metal ion binding; C:nucleus
Cnem002124-RA	494	XP_005101094.1	65.0	680.2	A0A2C9JXX5	64.4	636.0	K10638	F:GO:0005515	F:protein binding	G3DSA:2.30.30.1150 (GENE3D); IPR003105 (PFAM); IPR000626 (PFAM); IPR019787 (PFAM); IPR036987 (G3DSA:2.30.280.GENE3D); IPR021991 (PFAM); G3DSA:2.30.30.140 (GENE3D); G3DSA:3.10.20.90 (GENE3D); mobidb-lite (MOBIDB_LITE); mobidb-lite (MOBIDB_LITE); mobidb-lite (MOBIDB_LITE); mobidb-lite (MOBIDB_LITE); PTHR14140:SF33 (PANTHER); PTHR14140 (PANTHER); IPR001841 (PROSITE_PROFILES); IPR000626 (PROSITE_PROF…	E3 ubiquitin-protein ligase UHRF1-like	F:GO:0046872; C:GO:0005634	F:metal ion binding; C:nucleus
Cnem002125-RA	136	RUS90475.1	85.3	239.2	A0A3S1A089	85.3	239.2	K02901	P:GO:0006412; F:GO:0003735; C:GO:0005840	P:translation; F:structural constituent of ribosome; C:ribosome	IPR038655 (G3DSA:2.30.30.GENE3D); IPR001141 (PFAM); IPR005824 (PFAM); IPR001141 (PANTHER); PTHR10497:SF11 (PANTHER); IPR041991 (CDD); IPR008991 (SUPERFAMILY)	hypothetical protein EGW08_001743	P:GO:0006412; F:GO:0003735; C:GO:0005840	P:translation; F:structural constituent of ribosome; C:ribosome
Cnem002129-RA	167	no hit	no hit	no hit	no hit	no hit	no hit	no hit	no IPS match	no IPS match	no IPS match	---NA---	no GO terms	no GO terms
Cnem002130-RA	939	XP_013095098.1	74.2	1065.1	A0A2C9K2B7	74.6	1063.1	K13203	F:GO:0003676; F:GO:0008270	F:nucleic acid binding; F:zinc ion binding	IPR006561 (SMART); IPR003604 (SMART); IPR013087 (SMART); PF12874 (PFAM); G3DSA:1.10.1410.40 (GENE3D); G3DSA:3.30.160.60 (GENE3D); IPR006561 (PFAM); IPR043519 (G3DSA:3.30.460.GENE3D); mobidb-lite (MOBIDB_LITE); mobidb-lite (MOBIDB_LITE); mobidb-lite (MOBIDB_LITE); mobidb-lite (MOBIDB_LITE); mobidb-lite (MOBIDB_LITE); PTHR45762 (PANTHER); PTHR45762:SF5 (PANTHER); IPR013087 (PROSITE_PATTERNS); IPR01…	zinc finger RNA-binding protein-like isoform X1	F:GO:0003676; F:GO:0008270	F:nucleic acid binding; F:zinc ion binding
Cnem002131-RA	560	OOZ58401.1	37.7	345.1	A0A016T6D3	24.1	105.9	no hit	P:GO:0015074; F:GO:0003676	P:DNA integration; F:nucleic acid binding	G3DSA:1.10.340.70 (GENE3D); IPR041588 (PFAM); IPR036397 (G3DSA:3.30.420.GENE3D); PTHR24559 (PANTHER); PTHR24559:SF275 (PANTHER); IPR001584 (PROSITE_PROFILES); IPR012337 (SUPERFAMILY)	hypothetical protein BOW44_13110, partial	no GO terms	no GO terms
Cnem002132-RA	191	XP_005103996.1	36.4	127.9	A0A433U4I6	39.7	119.8	no hit	no GO terms	no GO terms	IPR000477 (PFAM); IPR000477 (PROSITE_PROFILES); IPR043502 (SUPERFAMILY)	RNA-directed DNA polymerase from mobile element jockey-like	no GO terms	no GO terms
Cnem002135-RA	315	XP_022296330.1	36.9	173.3	A0A2T7PNE3	33.6	152.1	no hit	no GO terms	no GO terms	Coil (COILS); mobidb-lite (MOBIDB_LITE); mobidb-lite (MOBIDB_LITE)	uncharacterized protein LOC111106094	no GO terms	no GO terms
Cnem002136-RA	315	XP_012940556.1	52.2	118.6	no hit	no hit	no hit	no hit	no IPS match	no IPS match	no IPS match	hypothetical protein EGW08_008040	P:GO:0090502; F:GO:0003676; F:GO:0004523	P:RNA phosphodiester bond hydrolysis, endonucleolytic; F:nucleic acid binding; F:RNA-DNA hybrid ribonuclease activity
Cnem002139-RA	204	GCF40389.1	40.4	111.3	A0A402E7Q0	37.2	109.4	no hit	no GO terms	no GO terms	Coil (COILS); PTHR47027 (PANTHER); PTHR47027:SF6 (PANTHER)	hypothetical protein parPi_0004000	no GO terms	no GO terms
Cnem002141-RA	212	WP_117197097.1;GBZ98790.1	44.4	140.6	H2YWZ5	41.1	145.6	no hit	no GO terms	no GO terms	IPR036691 (G3DSA:3.60.10.GENE3D); IPR027124 (PANTHER); PTHR23227:SF62 (PANTHER); IPR036691 (SUPERFAMILY)	endonuclease/exonuclease/phosphatase family protein	no GO terms	no GO terms
Cnem002142-RA	341	PVD27370.1	41.5	234.6	A0A3S1H9Q0	39.6	205.3	no hit	no GO terms	no GO terms	IPR000477 (PFAM); PTHR47027 (PANTHER); IPR000477 (PROSITE_PROFILES); IPR043502 (SUPERFAMILY)	hypothetical protein C0Q70_12527	no GO terms	no GO terms
Cnem002150-RA	351	no hit	no hit	no hit	no hit	no hit	no hit	no hit	no GO terms	no GO terms	mobidb-lite (MOBIDB_LITE); mobidb-lite (MOBIDB_LITE); mobidb-lite (MOBIDB_LITE); mobidb-lite (MOBIDB_LITE); IPR033524 (PROSITE_PATTERNS)	---NA---	no GO terms	no GO terms
Cnem002152-RA	806	OOZ58401.1	46.2	538.5	A0A139W8W2	29.4	237.3	no hit	P:GO:0015074; F:GO:0003676	P:DNA integration; F:nucleic acid binding	Coil (COILS); IPR041373 (PFAM); IPR041588 (PFAM); IPR036397 (G3DSA:3.30.420.GENE3D); IPR001584 (PFAM); G3DSA:3.10.20.370 (GENE3D); G3DSA:1.10.340.70 (GENE3D); mobidb-lite (MOBIDB_LITE); mobidb-lite (MOBIDB_LITE); mobidb-lite (MOBIDB_LITE); mobidb-lite (MOBIDB_LITE); PTHR24559:SF275 (PANTHER); PTHR24559 (PANTHER); IPR001584 (PROSITE_PROFILES); cd09274 (CDD); IPR012337 (SUPERFAMILY); IPR043502 (SUP…	hypothetical protein BOW44_13110, partial	no GO terms	no GO terms
Cnem002153-RA	226	RUS89376.1	51.1	105.9	A0A3S1CD12	51.1	105.9	no hit	no GO terms	no GO terms	PTHR47027 (PANTHER); PTHR47027:SF6 (PANTHER)	hypothetical protein EGW08_002896	F:GO:0005524; C:GO:0016021	F:ATP binding; C:integral component of membrane
Cnem002154-RA	198	no hit	no hit	no hit	no hit	no hit	no hit	no hit	no GO terms	no GO terms	CYTOPLASMIC_DOMAIN (PHOBIUS); CYTOPLASMIC_DOMAIN (PHOBIUS); TRANSMEMBRANE (PHOBIUS); NON_CYTOPLASMIC_DOMAIN (PHOBIUS); TRANSMEMBRANE (PHOBIUS); TRANSMEMBRANE (PHOBIUS); NON_CYTOPLASMIC_DOMAIN (PHOBIUS); TMhelix (TMHMM); TMhelix (TMHMM)	---NA---	no GO terms	no GO terms
Cnem002156-RA	144	XP_013095072.1	76.1	224.9	A0A2C9K298	76.1	224.9	K20878	P:GO:0006468; F:GO:0004672; F:GO:0005524	P:protein phosphorylation; F:protein kinase activity; F:ATP binding	IPR000719 (SMART); IPR000719 (PFAM); G3DSA:3.30.200.20 (GENE3D); G3DSA:1.10.510.10 (GENE3D); PTHR44535 (PANTHER); IPR000719 (PROSITE_PROFILES); IPR011009 (SUPERFAMILY)	serine/threonine-protein kinase Nek9-like	no GO terms	no GO terms
Cnem002158-RA	193	no hit	no hit	no hit	no hit	no hit	no hit	no hit	no GO terms	no GO terms	CYTOPLASMIC_DOMAIN (PHOBIUS); CYTOPLASMIC_DOMAIN (PHOBIUS); TRANSMEMBRANE (PHOBIUS); CYTOPLASMIC_DOMAIN (PHOBIUS); TRANSMEMBRANE (PHOBIUS); NON_CYTOPLASMIC_DOMAIN (PHOBIUS); TRANSMEMBRANE (PHOBIUS); TRANSMEMBRANE (PHOBIUS); NON_CYTOPLASMIC_DOMAIN (PHOBIUS); TMhelix (TMHMM); TMhelix (TMHMM); TMhelix (TMHMM); TMhelix (TMHMM)	---NA---	no GO terms	no GO terms
Cnem002160-RA	127	XP_005112272.1	54.3	119.8	A0A2C9LYY4	54.9	114.0	no hit	no GO terms	no GO terms	IPR003598 (SMART); IPR003599 (SMART); IPR013098 (PFAM); IPR013783 (G3DSA:2.60.40.GENE3D); PTHR45080 (PANTHER); IPR007110 (PROSITE_PROFILES); cd00096 (CDD); IPR036179 (SUPERFAMILY)	neuroplastin-like isoform X2	no GO terms	no GO terms
Cnem002161-RA	188	XP_005112272.1	38.7	114.0	A0A433SQS0	35.9	91.7	no hit	no GO terms	no GO terms	IPR003599 (SMART); IPR013783 (G3DSA:2.60.40.GENE3D); IPR013151 (PFAM); IPR013783 (G3DSA:2.60.40.GENE3D); IPR007110 (PROSITE_PROFILES); IPR007110 (PROSITE_PROFILES); cd00096 (CDD); IPR036179 (SUPERFAMILY); IPR036179 (SUPERFAMILY)	neuroplastin-like isoform X2	no GO terms	no GO terms
Cnem002163-RA	350	no hit	no hit	no hit	no hit	no hit	no hit	no hit	no GO terms	no GO terms	mobidb-lite (MOBIDB_LITE); mobidb-lite (MOBIDB_LITE); mobidb-lite (MOBIDB_LITE); mobidb-lite (MOBIDB_LITE)	---NA---	no GO terms	no GO terms
Cnem002172-RA	325	XP_005106436.1	68.9	297.0	A0A3S0ZGC3	60.6	270.0	no hit	C:GO:0005758	C:mitochondrial intermembrane space	IPR006797 (PFAM); PTHR11158:SF29 (PANTHER); IPR037365 (PANTHER); SIGNAL_PEPTIDE_H_REGION (PHOBIUS); SIGNAL_PEPTIDE_N_REGION (PHOBIUS); SIGNAL_PEPTIDE_C_REGION (PHOBIUS); NON_CYTOPLASMIC_DOMAIN (PHOBIUS); SIGNAL_PEPTIDE (PHOBIUS); IPR006797 (PROSITE_PROFILES)	PRELI domain-containing protein 1, mitochondrial-like	no GO terms	no GO terms
Cnem002173-RA	413	RUS85375.1	85.0	672.2	A0A3S1BJS8	85.0	672.2	K03062	P:GO:0030163; F:GO:0005524; F:GO:0016787; F:GO:0036402; C:GO:0005737	P:protein catabolic process; F:ATP binding; F:hydrolase activity; F:proteasome-activating ATPase activity; C:cytoplasm	IPR003593 (SMART); G3DSA:1.10.8.60 (GENE3D); IPR041569 (PFAM); IPR003959 (PFAM); G3DSA:2.40.50.140 (GENE3D); G3DSA:3.40.50.300 (GENE3D); IPR005937 (TIGRFAM); mobidb-lite (MOBIDB_LITE); mobidb-lite (MOBIDB_LITE); IPR035244 (PTHR23073:PANTHER); PTHR23073 (PANTHER); IPR035244 (PTHR23073:PANTHER); IPR003960 (PROSITE_PATTERNS); cd00009 (CDD); IPR027417 (SUPERFAMILY)	hypothetical protein EGW08_006860	P:GO:1901800; F:GO:0005524; F:GO:0036402; C:GO:0005737	P:positive regulation of proteasomal protein catabolic process; F:ATP binding; F:proteasome-activating ATPase activity; C:cytoplasm
Cnem002181-RA	804	XP_012935652.1	53.3	633.3	A0A2C9LZK9	45.2	546.2	K11536	P:GO:1901642; F:GO:0005337; C:GO:0016020	P:nucleoside transmembrane transport; F:nucleoside transmembrane transporter activity; C:membrane	IPR011657 (PFAM); IPR002668 (PFAM); IPR008276 (PANTHER); NON_CYTOPLASMIC_DOMAIN (PHOBIUS); CYTOPLASMIC_DOMAIN (PHOBIUS); NON_CYTOPLASMIC_DOMAIN (PHOBIUS); NON_CYTOPLASMIC_DOMAIN (PHOBIUS); TRANSMEMBRANE (PHOBIUS); CYTOPLASMIC_DOMAIN (PHOBIUS); CYTOPLASMIC_DOMAIN (PHOBIUS); TRANSMEMBRANE (PHOBIUS); TRANSMEMBRANE (PHOBIUS); CYTOPLASMIC_DOMAIN (PHOBIUS); TRANSMEMBRANE (PHOBIUS); TRANSMEMBRANE (PHOBI…	solute carrier family 28 member 3-like isoform X2	no GO terms	no GO terms
Cnem002197-RA	699	RUS88711.1	35.4	344.4	A0A433U4I6	35.4	344.4	no hit	no GO terms	no GO terms	Coil (COILS); IPR000477 (PFAM); PTHR47027 (PANTHER); PTHR47027:SF6 (PANTHER); TRANSMEMBRANE (PHOBIUS); NON_CYTOPLASMIC_DOMAIN (PHOBIUS); CYTOPLASMIC_DOMAIN (PHOBIUS); IPR000477 (PROSITE_PROFILES); IPR000477 (PROSITE_PROFILES); IPR043502 (SUPERFAMILY)	hypothetical protein EGW08_003526	P:GO:0090502; F:GO:0003676; F:GO:0004523	P:RNA phosphodiester bond hydrolysis, endonucleolytic; F:nucleic acid binding; F:RNA-DNA hybrid ribonuclease activity
Cnem002198-RA	236	RUS80216.1	37.7	153.3	A0A3P8TFH9	43.0	187.2	no hit	no GO terms	no GO terms	PTHR19446:SF427 (PANTHER); PTHR19446 (PANTHER); IPR043502 (SUPERFAMILY)	PREDICTED: uncharacterized protein LOC106816918	no GO terms	no GO terms
Cnem002204-RA	203	no hit	no hit	no hit	no hit	no hit	no hit	no hit	no GO terms	no GO terms	CYTOPLASMIC_DOMAIN (PHOBIUS); TRANSMEMBRANE (PHOBIUS); NON_CYTOPLASMIC_DOMAIN (PHOBIUS)	---NA---	no GO terms	no GO terms
Cnem002214-RA	686	XP_014677047.1	45.7	477.6	W4Y5A2	38.2	418.3	no hit	no GO terms	no GO terms	IPR000477 (PFAM); PTHR19446 (PANTHER); PTHR19446:SF427 (PANTHER); IPR000477 (PROSITE_PROFILES); cd01650 (CDD); IPR043502 (SUPERFAMILY)	PREDICTED: uncharacterized protein LOC106816918	no GO terms	no GO terms
Cnem002218-RA	510	RUS70916.1	33.9	236.1	A0A433T6G4	44.7	172.6	no hit	F:GO:0003676; F:GO:0004523	F:nucleic acid binding; F:RNA-DNA hybrid ribonuclease activity	IPR002156 (PFAM); IPR036397 (G3DSA:3.30.420.GENE3D); PTHR10642 (PANTHER); IPR002156 (PROSITE_PROFILES); cd09276 (CDD); SignalP-noTM (SIGNALP_EUK); IPR012337 (SUPERFAMILY)	hypothetical protein BOV88_13545	P:GO:0090502; F:GO:0003676; F:GO:0004523	P:RNA phosphodiester bond hydrolysis, endonucleolytic; F:nucleic acid binding; F:RNA-DNA hybrid ribonuclease activity
Cnem002220-RA	806	WP_144078600.1	38.6	561.2	A0A016U4X2	31.5	316.2	no hit	no GO terms	no GO terms	G3DSA:3.10.20.370 (GENE3D); IPR000477 (PFAM); IPR041588 (PFAM); IPR041373 (PFAM); IPR043128 (G3DSA:3.30.70.GENE3D); IPR043128 (G3DSA:3.30.70.GENE3D); G3DSA:3.10.10.10 (GENE3D); G3DSA:1.10.340.70 (GENE3D); PTHR24559 (PANTHER); PTHR24559:SF269 (PANTHER); IPR000477 (PROSITE_PROFILES); cd09274 (CDD); cd01647 (CDD); IPR043502 (SUPERFAMILY)	DDE-type integrase/transposase/recombinase	no GO terms	no GO terms
Cnem002223-RA	319	KXJ10292.1	35.2	141.0	A0A3S1A2L0	53.2	122.1	no hit	no GO terms	no GO terms	IPR000477 (PFAM); PTHR47027 (PANTHER); PTHR47027:SF6 (PANTHER); IPR000477 (PROSITE_PROFILES); IPR043502 (SUPERFAMILY)	hypothetical protein EGW08_002896	F:GO:0005524; C:GO:0016021	F:ATP binding; C:integral component of membrane
Cnem002226-RA	711	WP_078461487.1;OOY49051.1	49.2	668.3	A0A3S1ASJ4	42.2	549.3	no hit	F:GO:0003676; F:GO:0004523	F:nucleic acid binding; F:RNA-DNA hybrid ribonuclease activity	IPR002156 (PFAM); IPR000477 (PFAM); IPR036397 (G3DSA:3.30.420.GENE3D); PTHR19446:SF427 (PANTHER); PTHR19446 (PANTHER); IPR002156 (PROSITE_PROFILES); IPR000477 (PROSITE_PROFILES); cd09276 (CDD); cd01650 (CDD); IPR012337 (SUPERFAMILY); IPR043502 (SUPERFAMILY)	hypothetical protein	no GO terms	no GO terms
Cnem002230-RA	841	XP_013082748.1;XP_013082821.1;XP_013082895.1;XP_013082958.1	43.5	233.8	A0A2C9LMX4	43.5	233.8	K12597	F:GO:0003676; F:GO:0008270	F:nucleic acid binding; F:zinc ion binding	IPR001878 (SMART); IPR001878 (PFAM); G3DSA:4.10.60.10 (GENE3D); G3DSA:4.10.60.10 (GENE3D); mobidb-lite (MOBIDB_LITE); mobidb-lite (MOBIDB_LITE); mobidb-lite (MOBIDB_LITE); mobidb-lite (MOBIDB_LITE); mobidb-lite (MOBIDB_LITE); mobidb-lite (MOBIDB_LITE); mobidb-lite (MOBIDB_LITE); mobidb-lite (MOBIDB_LITE); mobidb-lite (MOBIDB_LITE); mobidb-lite (MOBIDB_LITE); mobidb-lite (MOBIDB_LITE); mobidb-lite…	PREDICTED: uncharacterized protein LOC106067976	F:GO:0003676; F:GO:0008270	F:nucleic acid binding; F:zinc ion binding
Cnem002233-RA	307	XP_013083247.1	83.8	496.5	A0A2C9JG25	83.8	496.5	K23551	P:GO:0007015; P:GO:0030036; F:GO:0030674; F:GO:0051015	P:actin filament organization; P:actin cytoskeleton organization; F:protein-macromolecule adaptor activity; F:actin filament binding	G3DSA:2.80.10.50 (GENE3D); IPR022768 (PFAM); G3DSA:2.80.10.50 (GENE3D); IPR010431 (PANTHER); IPR030144 (PTHR10551:PANTHER); IPR022768 (CDD); IPR008999 (SUPERFAMILY); IPR008999 (SUPERFAMILY)	PREDICTED: fascin-like	P:GO:0007015; F:GO:0030674; F:GO:0051015; C:GO:0005737; C:GO:0005856	P:actin filament organization; F:protein-macromolecule adaptor activity; F:actin filament binding; C:cytoplasm; C:cytoskeleton
Cnem002238-RA	365	XP_005112963.1	82.5	400.2	A0A3S1BUG1	82.5	399.8	K06944	F:GO:0003676; F:GO:0004523; F:GO:0005525	F:nucleic acid binding; F:RNA-DNA hybrid ribonuclease activity; F:GTP binding	IPR006073 (PRINTS); IPR006073 (PFAM); G3DSA:3.40.50.300 (GENE3D); IPR005225 (TIGRFAM); IPR031662 (PFAM); PTHR43127:SF2 (PANTHER); PTHR43127 (PANTHER); IPR006074 (PROSITE_PATTERNS); SIGNAL_PEPTIDE_C_REGION (PHOBIUS); NON_CYTOPLASMIC_DOMAIN (PHOBIUS); SIGNAL_PEPTIDE_H_REGION (PHOBIUS); SIGNAL_PEPTIDE_N_REGION (PHOBIUS); SIGNAL_PEPTIDE (PHOBIUS); IPR002156 (PROSITE_PROFILES); IPR031167 (PROSITE_PROF…	developmentally-regulated GTP-binding protein 2-like	no GO terms	no GO terms
Cnem002244-RA	1729	RUS89001.1	76.6	1602.0	A0A3S1BID5	76.6	1602.0	K10352	F:GO:0003774; F:GO:0005515; F:GO:0005524; C:GO:0016459	F:motor activity; F:protein binding; F:ATP binding; C:myosin complex	Coil (COILS); Coil (COILS); Coil (COILS); Coil (COILS); Coil (COILS); Coil (COILS); Coil (COILS); IPR001609 (PRINTS); IPR001609 (SMART); IPR027401 (G3DSA:4.10.270.GENE3D); G3DSA:1.20.5.340 (GENE3D); G3DSA:3.30.70.3240 (GENE3D); G3DSA:1.20.120.720 (GENE3D); G3DSA:1.20.5.340 (GENE3D); IPR036961 (G3DSA:3.40.850.GENE3D); G3DSA:1.10.10.820 (GENE3D); IPR001609 (PFAM); G3DSA:1.20.58.530 (GENE3D); G3DSA:…	myosin heavy chain non-muscle isoform X7	F:GO:0003774; F:GO:0005524; F:GO:0051015; C:GO:0016459	F:motor activity; F:ATP binding; F:actin filament binding; C:myosin complex
Cnem002249-RA	352	PVD34672.1	56.3	379.0	A0A2T7PMN6	56.3	379.0	no hit	no GO terms	no GO terms	IPR000477 (PFAM); mobidb-lite (MOBIDB_LITE); PTHR33332 (PANTHER); PTHR33332:SF21 (PANTHER); IPR000477 (PROSITE_PROFILES); cd01650 (CDD); IPR043502 (SUPERFAMILY)	hypothetical protein C0Q70_05949	no GO terms	no GO terms
Cnem002251-RA	253	VEN57771.1	46.8	73.6	A0A402EIV2	43.4	63.5	no hit	no GO terms	no GO terms	mobidb-lite (MOBIDB_LITE); mobidb-lite (MOBIDB_LITE); PTHR47027:SF6 (PANTHER); PTHR47027 (PANTHER)	---NA---	no GO terms	no GO terms
Cnem002253-RA	336	XP_013071564.1	83.6	577.8	A0A2C9K875	83.6	577.8	K06843	no GO terms	no GO terms	IPR002049 (SMART); IPR008211 (SMART); IPR008211 (PFAM); IPR002049 (PFAM); G3DSA:2.10.25.10 (GENE3D); IPR038684 (G3DSA:2.60.120.GENE3D); PTHR10574:SF292 (PANTHER); PTHR10574 (PANTHER); IPR002049 (PROSITE_PATTERNS); IPR008211 (PROSITE_PROFILES); cd00055 (CDD); SSF57196 (SUPERFAMILY); IPR008979 (SUPERFAMILY)	netrin-1-like isoform X1	C:GO:0005576	C:extracellular region
Cnem002257-RA	138	XP_013071563.1	76.9	228.4	A0A2C9K875	76.9	228.4	no hit	no GO terms	no GO terms	IPR002049 (SMART); IPR002049 (PFAM); G3DSA:2.170.300.10 (GENE3D); G3DSA:2.10.25.10 (GENE3D); mobidb-lite (MOBIDB_LITE); mobidb-lite (MOBIDB_LITE); PTHR10574:SF292 (PANTHER); PTHR10574 (PANTHER); IPR002049 (PROSITE_PATTERNS); IPR002049 (PROSITE_PATTERNS); IPR002049 (PROSITE_PROFILES); IPR002049 (PROSITE_PROFILES); cd00055 (CDD); cd00055 (CDD); SSF57196 (SUPERFAMILY); SSF57196 (SUPERFAMILY)	netrin-1-like isoform X1	C:GO:0005576	C:extracellular region
Cnem002258-RA	149	XP_012946275.1	59.8	146.4	V4AN98	59.1	145.2	no hit	F:GO:0005515	F:protein binding	IPR018933 (SMART); IPR018933 (PFAM); IPR008993 (G3DSA:2.40.50.GENE3D); PTHR10574:SF292 (PANTHER); PTHR10574 (PANTHER); IPR001134 (PROSITE_PROFILES); IPR008993 (SUPERFAMILY)	PREDICTED: netrin-1-like	no GO terms	no GO terms
Cnem002265-RA	760	XP_013064790.1	28.6	142.5	A0A2C9LF46	28.6	142.5	no hit	no GO terms	no GO terms	mobidb-lite (MOBIDB_LITE); mobidb-lite (MOBIDB_LITE); mobidb-lite (MOBIDB_LITE); mobidb-lite (MOBIDB_LITE); mobidb-lite (MOBIDB_LITE); mobidb-lite (MOBIDB_LITE); mobidb-lite (MOBIDB_LITE); mobidb-lite (MOBIDB_LITE); mobidb-lite (MOBIDB_LITE); mobidb-lite (MOBIDB_LITE)	TATA element modulatory factor-like isoform X3	no GO terms	no GO terms
Cnem002274-RA	188	XP_013070549.1	75.9	208.4	A0A2C9L803	75.9	208.4	K06698	C:GO:0008537	C:proteasome activator complex	IPR003186 (PFAM); IPR036997 (G3DSA:1.20.120.GENE3D); IPR009077 (PANTHER); IPR036252 (SUPERFAMILY)	proteasome activator complex subunit 3-like	C:GO:0008537	C:proteasome activator complex
Cnem002275-RA	292	XP_005098324.1	72.2	307.4	A0A433TTA6	70.4	300.8	K08202	P:GO:0055085; F:GO:0022857; C:GO:0016021	P:transmembrane transport; F:transmembrane transporter activity; C:integral component of membrane	IPR005828 (PFAM); G3DSA:1.20.1250.20 (GENE3D); PTHR24064 (PANTHER); PTHR24064:SF500 (PANTHER); IPR006600 (PROSITE_PROFILES); cd17317 (CDD); IPR036259 (SUPERFAMILY)	organic cation transporter protein-like	no GO terms	no GO terms
Cnem002277-RA	187	XP_013064438.1;XP_013064439.1	77.8	223.0	A0A2C9K6P7	77.8	223.0	K09350	no GO terms	no GO terms	mobidb-lite (MOBIDB_LITE); mobidb-lite (MOBIDB_LITE)	PREDICTED: uncharacterized protein LOC106053438	no GO terms	no GO terms
Cnem002280-RA	484	WP_078461487.1;OOY49051.1	32.0	218.4	K7GFF7	50.5	99.0	no hit	F:GO:0003676; F:GO:0004523	F:nucleic acid binding; F:RNA-DNA hybrid ribonuclease activity	IPR002156 (PFAM); IPR036397 (G3DSA:3.30.420.GENE3D); PTHR10642 (PANTHER); IPR002156 (PROSITE_PROFILES); cd09276 (CDD); IPR012337 (SUPERFAMILY)	hypothetical protein EGW08_013652	P:GO:0090502; F:GO:0003676; F:GO:0004523	P:RNA phosphodiester bond hydrolysis, endonucleolytic; F:nucleic acid binding; F:RNA-DNA hybrid ribonuclease activity
Cnem002286-RA	661	XP_013062306.1	91.1	1158.7	A0A2C9K531	91.1	1158.7	K04043	P:GO:0006457; F:GO:0005524; F:GO:0051082	P:protein folding; F:ATP binding; F:unfolded protein binding	PR00301 (PRINTS); G3DSA:3.30.420.40 (GENE3D); IPR029048 (G3DSA:1.20.1270.GENE3D); G3DSA:3.30.30.30 (GENE3D); IPR012725 (TIGRFAM); IPR013126 (PFAM); G3DSA:3.90.640.10 (GENE3D); G3DSA:3.30.420.40 (GENE3D); IPR029047 (G3DSA:2.60.34.GENE3D); mobidb-lite (MOBIDB_LITE); mobidb-lite (MOBIDB_LITE); PTHR19375:SF409 (PANTHER); IPR013126 (PANTHER); IPR012725 (HAMAP); cd11733 (CDD); IPR043129 (SUPERFAMILY); …	stress-70 protein, mitochondrial-like	P:GO:0006457; F:GO:0005524; F:GO:0051082	P:protein folding; F:ATP binding; F:unfolded protein binding
Cnem002287-RA	392	XP_013062315.1	54.7	426.4	A0A2C9LBV5	54.7	426.4	K13506	F:GO:0016746	F:transferase activity, transferring acyl groups	IPR000477 (PFAM); IPR002123 (PFAM); PTHR23063 (PANTHER); PTHR23063 (PANTHER); PTHR23063:SF10 (PANTHER); PTHR23063:SF10 (PANTHER); cd07991 (CDD)	glycerol-3-phosphate acyltransferase 4-like isoform X2	C:GO:0016020	C:membrane
Cnem002288-RA	131	RUS71964.1	59.5	141.0	A0A3S0Z8R7	59.5	141.0	no hit	no GO terms	no GO terms	mobidb-lite (MOBIDB_LITE)	hypothetical protein EGW08_020277	F:GO:0016746; C:GO:0016021	F:transferase activity, transferring acyl groups; C:integral component of membrane
Cnem002291-RA	297	RUS73958.1	55.2	279.6	A0A3S1B7J0	55.2	279.6	K03539	P:GO:0008033; F:GO:0003824; F:GO:0004526	P:tRNA processing; F:catalytic activity; F:ribonuclease P activity	IPR002738 (PFAM); G3DSA:3.20.20.140 (GENE3D); mobidb-lite (MOBIDB_LITE); mobidb-lite (MOBIDB_LITE); IPR002738 (PANTHER); IPR016195 (SUPERFAMILY)	hypothetical protein EGW08_018273	P:GO:0008033; P:GO:0090502; F:GO:0004526	P:tRNA processing; P:RNA phosphodiester bond hydrolysis, endonucleolytic; F:ribonuclease P activity
Cnem002294-RA	589	XP_013074634.1	94.2	798.1	A0A2C9JND9	94.2	798.1	K03362	F:GO:0005515	F:protein binding	IPR020472 (PRINTS); G3DSA:1.20.1280.50 (GENE3D); IPR015943 (G3DSA:2.130.10.GENE3D); IPR001680 (PFAM); IPR001810 (PFAM); PTHR44156 (PANTHER); PTHR44156:SF2 (PANTHER); IPR001680 (PROSITE_PROFILES); IPR001680 (PROSITE_PROFILES); IPR001680 (PROSITE_PROFILES); IPR001680 (PROSITE_PROFILES); IPR001680 (PROSITE_PROFILES); IPR001680 (PROSITE_PROFILES); IPR001810 (PROSITE_PROFILES); IPR001680 (PROSITE_PROF…	F-box/WD repeat-containing protein 1A-like	F:GO:0046983	F:protein dimerization activity
Cnem002297-RA	630	XP_005089812.1	75.8	852.0	A0A2C9JRG3	80.0	835.9	K02602	P:GO:0006417; F:GO:0003676; F:GO:0003730; F:GO:0045182	P:regulation of translation; F:nucleic acid binding; F:mRNA 3'-UTR binding; F:translation regulator activity	IPR012677 (G3DSA:3.30.70.GENE3D); IPR032296 (PFAM); IPR000504 (PFAM); IPR038446 (G3DSA:3.30.40.GENE3D); IPR012677 (G3DSA:3.30.70.GENE3D); mobidb-lite (MOBIDB_LITE); mobidb-lite (MOBIDB_LITE); mobidb-lite (MOBIDB_LITE); mobidb-lite (MOBIDB_LITE); IPR034819 (PANTHER); PTHR12566:SF7 (PANTHER); IPR000504 (PROSITE_PROFILES); IPR000504 (PROSITE_PROFILES); cd12726 (CDD); cd12724 (CDD); IPR035979 (SUPERF…	cytoplasmic polyadenylation element-binding protein 2-like	P:GO:0006417; F:GO:0003730; F:GO:0045182	P:regulation of translation; F:mRNA 3'-UTR binding; F:translation regulator activity
Cnem002301-RA	284	XP_005089809.1;XP_012938045.1;XP_012938049.1	31.8	105.9	A0A2C9KW54	33.1	94.4	no hit	no IPS match	no IPS match	no IPS match	PREDICTED: uncharacterized protein LOC101862232	no GO terms	no GO terms
Cnem002306-RA	357	XP_005091793.1	65.6	461.1	A0A433TXQ8	64.6	451.4	no hit	no GO terms	no GO terms	IPR000008 (PFAM); IPR002909 (PFAM); IPR013783 (G3DSA:2.60.40.GENE3D); IPR035892 (G3DSA:2.60.40.GENE3D); mobidb-lite (MOBIDB_LITE); mobidb-lite (MOBIDB_LITE); cd00102 (CDD); cd00030 (CDD); IPR014756 (SUPERFAMILY); SSF49562 (SUPERFAMILY)	PREDICTED: uncharacterized protein LOC101849032	no GO terms	no GO terms
Cnem002313-RA	583	XP_032225712.1	36.6	83.2	A0A2T7NK70	35.9	83.2	no hit	no GO terms	no GO terms	IPR036514 (G3DSA:3.40.50.GENE3D); mobidb-lite (MOBIDB_LITE); mobidb-lite (MOBIDB_LITE); mobidb-lite (MOBIDB_LITE); mobidb-lite (MOBIDB_LITE); mobidb-lite (MOBIDB_LITE); mobidb-lite (MOBIDB_LITE); PTHR47510 (PANTHER); cd00229 (CDD); SSF52266 (SUPERFAMILY)	uncharacterized protein LOC116608758	no GO terms	no GO terms
Cnem002314-RA	645	XP_013062313.1	74.2	991.5	A0A2C9K529	74.2	991.5	no hit	no IPS match	no IPS match	no IPS match	PREDICTED: uncharacterized protein LOC106051655	no GO terms	no GO terms
Cnem002316-RA	645	XP_013062313.1	74.1	990.3	A0A2C9K529	74.1	990.3	no hit	no IPS match	no IPS match	no IPS match	PREDICTED: uncharacterized protein LOC106051655	no GO terms	no GO terms
Cnem002331-RA	206	XP_005092202.1	71.3	238.4	A0A3S1C0Z5	64.6	232.6	K10743	F:GO:0003676; F:GO:0003723; F:GO:0004523	F:nucleic acid binding; F:RNA binding; F:RNA-DNA hybrid ribonuclease activity	IPR036397 (G3DSA:3.30.420.GENE3D); IPR024567 (PFAM); IPR023160 (G3DSA:1.10.10.GENE3D); IPR001352 (PANTHER); PTHR10954:SF7 (PANTHER); IPR012337 (SUPERFAMILY)	ribonuclease H2 subunit A-like isoform X2	no GO terms	no GO terms
Cnem002342-RA	256	RUS89376.1	53.3	103.6	A0A3S1CD12	53.3	103.6	no hit	no GO terms	no GO terms	mobidb-lite (MOBIDB_LITE); mobidb-lite (MOBIDB_LITE); mobidb-lite (MOBIDB_LITE); PTHR47027 (PANTHER); PTHR47027:SF6 (PANTHER)	hypothetical protein EGW08_011184	no GO terms	no GO terms
Cnem002347-RA	667	RUS84200.1	40.1	196.4	A0A3S0ZQ40	40.1	196.4	no hit	F:GO:0003676; F:GO:0004523	F:nucleic acid binding; F:RNA-DNA hybrid ribonuclease activity	IPR036397 (G3DSA:3.30.420.GENE3D); IPR002156 (PFAM); mobidb-lite (MOBIDB_LITE); mobidb-lite (MOBIDB_LITE); PTHR10642 (PANTHER); PTHR10642:SF0 (PANTHER); IPR002156 (PROSITE_PROFILES); cd14969 (CDD); IPR012337 (SUPERFAMILY)	hypothetical protein EGW08_003526	P:GO:0090502; F:GO:0003676; F:GO:0004523	P:RNA phosphodiester bond hydrolysis, endonucleolytic; F:nucleic acid binding; F:RNA-DNA hybrid ribonuclease activity
Cnem002355-RA	432	RUS70812.1	40.6	79.0	A0A433SNT6	40.6	79.0	no hit	P:GO:0006364; C:GO:0030688	P:rRNA processing; C:preribosome, small subunit precursor	Coil (COILS); mobidb-lite (MOBIDB_LITE); mobidb-lite (MOBIDB_LITE); mobidb-lite (MOBIDB_LITE); mobidb-lite (MOBIDB_LITE); IPR010301 (PANTHER)	---NA---	no GO terms	no GO terms
Cnem002357-RA	350	XP_012942089.1	77.0	523.1	A0A2C9JZ86	69.8	508.1	K11004	P:GO:0015721; P:GO:0055085; F:GO:0005524; F:GO:0016887; F:GO:0042626; C:GO:0016021	P:bile acid and bile salt transport; P:transmembrane transport; F:ATP binding; F:ATPase activity; F:ATPase-coupled transmembrane transporter activity; C:integral component of membrane	IPR003593 (SMART); IPR036640 (G3DSA:1.20.1560.GENE3D); IPR003439 (PFAM); G3DSA:3.40.50.300 (GENE3D); IPR030278 (PTHR24221:PANTHER); IPR039421 (PANTHER); IPR017871 (PROSITE_PATTERNS); NON_CYTOPLASMIC_DOMAIN (PHOBIUS); CYTOPLASMIC_DOMAIN (PHOBIUS); NON_CYTOPLASMIC_DOMAIN (PHOBIUS); TRANSMEMBRANE (PHOBIUS); TRANSMEMBRANE (PHOBIUS); IPR011527 (PROSITE_PROFILES); IPR003439 (PROSITE_PROFILES); cd03249 …	multidrug resistance protein 1-like	P:GO:0015721; P:GO:0055085; F:GO:0005524; F:GO:0016887; F:GO:0042626; C:GO:0016021	P:bile acid and bile salt transport; P:transmembrane transport; F:ATP binding; F:ATPase activity; F:ATPase-coupled transmembrane transporter activity; C:integral component of membrane
Cnem002359-RA	1032	XP_013089926.1	56.9	963.4	A0A2C9JZ84	56.9	963.4	K05658	P:GO:0055085; F:GO:0005524; F:GO:0016887; F:GO:0042626; C:GO:0016021	P:transmembrane transport; F:ATP binding; F:ATPase activity; F:ATPase-coupled transmembrane transporter activity; C:integral component of membrane	IPR003593 (SMART); IPR011527 (PFAM); IPR036640 (G3DSA:1.20.1560.GENE3D); IPR003439 (PFAM); IPR036640 (G3DSA:1.20.1560.GENE3D); G3DSA:3.40.50.300 (GENE3D); IPR000477 (PFAM); IPR030275 (PTHR24221:PANTHER); IPR039421 (PANTHER); IPR017871 (PROSITE_PATTERNS); CYTOPLASMIC_DOMAIN (PHOBIUS); CYTOPLASMIC_DOMAIN (PHOBIUS); TRANSMEMBRANE (PHOBIUS); TRANSMEMBRANE (PHOBIUS); NON_CYTOPLASMIC_DOMAIN (PHOBIUS); …	multidrug resistance protein 1-like	P:GO:0015721; P:GO:0055085; F:GO:0005524; F:GO:0016887; F:GO:0042626; C:GO:0016021	P:bile acid and bile salt transport; P:transmembrane transport; F:ATP binding; F:ATPase activity; F:ATPase-coupled transmembrane transporter activity; C:integral component of membrane
Cnem002363-RA	342	RUS88711.1	46.0	112.1	A0A3S0ZQ40	46.0	112.1	no hit	no IPS match	no IPS match	no IPS match	hypothetical protein EGW08_013568	no GO terms	no GO terms
Cnem002366-RA	200	XP_012946824.1	91.7	318.2	A0A2C9KUH3	92.3	309.3	K12757	F:GO:0005509	F:calcium ion binding	Coil (COILS); IPR002048 (SMART); G3DSA:1.10.238.10 (GENE3D); IPR002048 (PFAM); G3DSA:1.10.238.10 (GENE3D); PTHR23049 (PANTHER); IPR018247 (PROSITE_PATTERNS); IPR002048 (PROSITE_PROFILES); IPR002048 (PROSITE_PROFILES); IPR011992 (SUPERFAMILY)	myosin regulatory light chain (N-terminus) isoform X1	no GO terms	no GO terms
Cnem002372-RA	158	RUS70812.1	41.7	79.0	A0A433SNT6	41.7	79.0	no hit	no GO terms	no GO terms	PTHR47027 (PANTHER); PTHR47027:SF6 (PANTHER)	hypothetical protein EGW08_021432	no GO terms	no GO terms
Cnem002373-RA	644	XP_013089944.1	68.3	691.0	A0A2C9JZ80	68.3	691.0	K00021	P:GO:0015936; P:GO:0055114; F:GO:0004420; F:GO:0016616	P:coenzyme A metabolic process; P:oxidation-reduction process; F:hydroxymethylglutaryl-CoA reductase (NADPH) activity; F:oxidoreductase activity, acting on the CH-OH group of donors, NAD or NADP as acceptor	IPR023282 (G3DSA:1.10.3270.GENE3D); IPR000731 (PFAM); mobidb-lite (MOBIDB_LITE); mobidb-lite (MOBIDB_LITE); IPR002202 (PANTHER); PTHR10572:SF2 (PANTHER); NON_CYTOPLASMIC_DOMAIN (PHOBIUS); CYTOPLASMIC_DOMAIN (PHOBIUS); TRANSMEMBRANE (PHOBIUS); NON_CYTOPLASMIC_DOMAIN (PHOBIUS); CYTOPLASMIC_DOMAIN (PHOBIUS); TRANSMEMBRANE (PHOBIUS); TRANSMEMBRANE (PHOBIUS); NON_CYTOPLASMIC_DOMAIN (PHOBIUS); TRANSMEM…	3-hydroxy-3-methylglutaryl-coenzyme A reductase-like	no GO terms	no GO terms
Cnem002374-RA	306	XP_005096567.1	88.4	539.7	A0A2C9JZ80	86.7	532.7	K00021	P:GO:0008299; P:GO:0015936; P:GO:0055114; F:GO:0004420; F:GO:0005515; F:GO:0016616	P:isoprenoid biosynthetic process; P:coenzyme A metabolic process; P:oxidation-reduction process; F:hydroxymethylglutaryl-CoA reductase (NADPH) activity; F:protein binding; F:oxidoreductase activity, acting on the CH-OH group of donors, NAD or NADP as acceptor	IPR002202 (PRINTS); IPR009023 (G3DSA:3.30.70.GENE3D); IPR023074 (G3DSA:3.90.770.GENE3D); IPR002202 (PFAM); IPR002202 (PANTHER); PTHR10572:SF2 (PANTHER); IPR023076 (PROSITE_PATTERNS); IPR023076 (PROSITE_PATTERNS); IPR002202 (PROSITE_PROFILES); IPR004554 (CDD); IPR009029 (SUPERFAMILY); IPR009023 (SUPERFAMILY)	3-hydroxy-3-methylglutaryl-coenzyme A reductase-like	no GO terms	no GO terms
Cnem002376-RA	391	no hit	no hit	no hit	no hit	no hit	no hit	no hit	no GO terms	no GO terms	mobidb-lite (MOBIDB_LITE); mobidb-lite (MOBIDB_LITE); mobidb-lite (MOBIDB_LITE); mobidb-lite (MOBIDB_LITE); mobidb-lite (MOBIDB_LITE); mobidb-lite (MOBIDB_LITE)	---NA---	no GO terms	no GO terms
Cnem002379-RA	236	XP_013089927.1;XP_013089928.1;XP_013089929.1	53.6	192.2	A0A2C9LIY5	53.6	192.2	no hit	no GO terms	no GO terms	IPR019351 (PFAM); mobidb-lite (MOBIDB_LITE); mobidb-lite (MOBIDB_LITE); IPR019351 (PANTHER)	PREDICTED: uncharacterized protein C9orf85 homolog	no GO terms	no GO terms
Cnem002380-RA	557	XP_013080986.1	77.0	804.3	A0A2C9JSN6	75.6	795.8	K08840	no GO terms	no GO terms	IPR001180 (SMART); IPR001180 (PFAM); mobidb-lite (MOBIDB_LITE); mobidb-lite (MOBIDB_LITE); mobidb-lite (MOBIDB_LITE); mobidb-lite (MOBIDB_LITE); mobidb-lite (MOBIDB_LITE); mobidb-lite (MOBIDB_LITE); mobidb-lite (MOBIDB_LITE); mobidb-lite (MOBIDB_LITE); PTHR47096 (PANTHER); IPR001180 (PROSITE_PROFILES)	serine/threonine-protein kinase mig-15-like isoform X2	P:GO:0000185; F:GO:0005524; F:GO:0008349	P:activation of MAPKKK activity; F:ATP binding; F:MAP kinase kinase kinase kinase activity
Cnem002384-RA	180	XP_013089941.1	93.4	345.9	A0A2C9JZ83	93.4	345.9	K13096	F:GO:0003676	F:nucleic acid binding	IPR000467 (SMART); IPR000467 (PFAM); mobidb-lite (MOBIDB_LITE); IPR040169 (PANTHER); PTHR23340:SF3 (PANTHER); IPR000467 (PROSITE_PROFILES)	protein rad9-like	P:GO:0006396; F:GO:0003723	P:RNA processing; F:RNA binding
Cnem002386-RA	928	XP_011552918.1	39.0	614.8	A0A2A4JBK9	38.0	578.2	no hit	no GO terms	no GO terms	IPR036691 (G3DSA:3.60.10.GENE3D); IPR005135 (PFAM); IPR000477 (PFAM); PTHR19446:SF427 (PANTHER); PTHR19446 (PANTHER); IPR000477 (PROSITE_PROFILES); cd09076 (CDD); cd01650 (CDD); IPR043502 (SUPERFAMILY); IPR036691 (SUPERFAMILY); TMhelix (TMHMM)	RNA-directed DNA polymerase from mobile element jockey-like	no GO terms	no GO terms
Cnem002391-RA	356	XP_005096570.1	69.7	505.0	A0A2C9KDM9	65.0	478.0	K00856	P:GO:0006166; F:GO:0004001	P:purine ribonucleoside salvage; F:adenosine kinase activity	IPR001805 (PRINTS); IPR011611 (PFAM); G3DSA:3.30.1110.10 (GENE3D); IPR029056 (G3DSA:3.40.1190.GENE3D); PTHR45769 (PANTHER); PTHR45769:SF3 (PANTHER); cd01168 (CDD); IPR029056 (SUPERFAMILY)	adenosine kinase 2-like	no GO terms	no GO terms
Cnem002392-RA	292	VVC34053.1	43.0	70.9	A0A433SU04	48.4	66.2	no hit	no GO terms	no GO terms	mobidb-lite (MOBIDB_LITE); mobidb-lite (MOBIDB_LITE); mobidb-lite (MOBIDB_LITE); PTHR47027 (PANTHER); PTHR47027:SF6 (PANTHER)	---NA---	no GO terms	no GO terms
Cnem002395-RA	790	RUS72568.1	91.7	143.7	A0A3S1B1C1	91.7	143.7	no hit	F:GO:0003676; F:GO:0003924; F:GO:0004523; F:GO:0005515; F:GO:0005525	F:nucleic acid binding; F:GTPase activity; F:RNA-DNA hybrid ribonuclease activity; F:protein binding; F:GTP binding	SM00175 (SMART); IPR015943 (G3DSA:2.130.10.GENE3D); IPR002156 (PFAM); G3DSA:3.40.50.300 (GENE3D); IPR036397 (G3DSA:3.30.420.GENE3D); IPR001806 (PFAM); IPR036397 (G3DSA:3.30.420.GENE3D); PTHR24073:SF471 (PANTHER); PTHR24073 (PANTHER); IPR002156 (PROSITE_PROFILES); PS51419 (PROSITE_PROFILES); IPR002156 (PROSITE_PROFILES); IPR027417 (SUPERFAMILY); IPR012337 (SUPERFAMILY); IPR036322 (SUPERFAMILY); IP…	hypothetical protein EGW08_008040	P:GO:0090502; F:GO:0003676; F:GO:0004523	P:RNA phosphodiester bond hydrolysis, endonucleolytic; F:nucleic acid binding; F:RNA-DNA hybrid ribonuclease activity
Cnem002397-RA	3351	XP_012934821.1	35.6	246.1	A0A2C9JZ75	33.9	196.8	no hit	no GO terms	no GO terms	Coil (COILS); Coil (COILS); Coil (COILS); mobidb-lite (MOBIDB_LITE); mobidb-lite (MOBIDB_LITE); mobidb-lite (MOBIDB_LITE); mobidb-lite (MOBIDB_LITE); mobidb-lite (MOBIDB_LITE); mobidb-lite (MOBIDB_LITE); mobidb-lite (MOBIDB_LITE); mobidb-lite (MOBIDB_LITE); mobidb-lite (MOBIDB_LITE); mobidb-lite (MOBIDB_LITE); mobidb-lite (MOBIDB_LITE); mobidb-lite (MOBIDB_LITE); mobidb-lite (MOBIDB_LITE); mobidb…	nervous system adducin isoform X1	no GO terms	no GO terms
Cnem002398-RA	164	XP_013089924.1	83.8	240.0	A0A2C9JZ75	83.8	240.0	K18622	no GO terms	no GO terms	Coil (COILS); mobidb-lite (MOBIDB_LITE); mobidb-lite (MOBIDB_LITE); mobidb-lite (MOBIDB_LITE); PTHR10672:SF3 (PANTHER); PTHR10672 (PANTHER); SIGNAL_PEPTIDE_N_REGION (PHOBIUS); SIGNAL_PEPTIDE_H_REGION (PHOBIUS); SIGNAL_PEPTIDE (PHOBIUS); NON_CYTOPLASMIC_DOMAIN (PHOBIUS); SIGNAL_PEPTIDE_C_REGION (PHOBIUS)	PREDICTED: uncharacterized protein LOC106073825	no GO terms	no GO terms
Cnem002399-RA	222	XP_023241473.1	42.1	71.6	A0A402F9K5	42.9	69.3	no hit	no GO terms	no GO terms	mobidb-lite (MOBIDB_LITE); mobidb-lite (MOBIDB_LITE); mobidb-lite (MOBIDB_LITE); mobidb-lite (MOBIDB_LITE); PTHR47027 (PANTHER); PTHR47027:SF6 (PANTHER)	hypothetical protein EGW08_002896	F:GO:0005524; C:GO:0016021	F:ATP binding; C:integral component of membrane
Cnem002405-RA	321	XP_013073752.1	42.7	280.4	A0A2C9KAG3	42.7	280.4	no hit	no GO terms	no GO terms	Coil (COILS); IPR036691 (G3DSA:3.60.10.GENE3D); PTHR23227:SF49 (PANTHER); IPR027124 (PANTHER); SIGNAL_PEPTIDE_N_REGION (PHOBIUS); NON_CYTOPLASMIC_DOMAIN (PHOBIUS); SIGNAL_PEPTIDE_C_REGION (PHOBIUS); SIGNAL_PEPTIDE_H_REGION (PHOBIUS); SIGNAL_PEPTIDE (PHOBIUS); SignalP-noTM (SIGNALP_EUK); IPR036691 (SUPERFAMILY)	craniofacial development protein 2-like	no GO terms	no GO terms
Cnem002407-RA	376	XP_012937187.1	41.6	140.2	no hit	no hit	no hit	no hit	F:GO:0003676; F:GO:0004523	F:nucleic acid binding; F:RNA-DNA hybrid ribonuclease activity	IPR000477 (PFAM); IPR002156 (PFAM); IPR036397 (G3DSA:3.30.420.GENE3D); IPR002156 (PROSITE_PROFILES); IPR012337 (SUPERFAMILY)	PREDICTED: uncharacterized protein LOC106013216	no GO terms	no GO terms
Cnem002410-RA	329	RUS88711.1	34.4	209.5	A0A433U4I6	34.4	209.5	no hit	F:GO:0003676; F:GO:0004523	F:nucleic acid binding; F:RNA-DNA hybrid ribonuclease activity	IPR036397 (G3DSA:3.30.420.GENE3D); IPR002156 (PROSITE_PROFILES); IPR012337 (SUPERFAMILY)	hypothetical protein EGW08_003526	P:GO:0090502; F:GO:0003676; F:GO:0004523	P:RNA phosphodiester bond hydrolysis, endonucleolytic; F:nucleic acid binding; F:RNA-DNA hybrid ribonuclease activity
Cnem002411-RA	552	RUS88711.1	47.5	235.7	A0A433U4I6	47.5	235.7	no hit	F:GO:0003676; F:GO:0004523	F:nucleic acid binding; F:RNA-DNA hybrid ribonuclease activity	IPR036397 (G3DSA:3.30.420.GENE3D); IPR002156 (PFAM); IPR036397 (G3DSA:3.30.420.GENE3D); PTHR10642 (PANTHER); IPR002156 (PROSITE_PROFILES); cd09276 (CDD); IPR012337 (SUPERFAMILY); IPR012337 (SUPERFAMILY)	hypothetical protein EGW08_008040	P:GO:0090502; F:GO:0003676; F:GO:0004523	P:RNA phosphodiester bond hydrolysis, endonucleolytic; F:nucleic acid binding; F:RNA-DNA hybrid ribonuclease activity
Cnem002414-RA	265	GCF51029.1	36.0	155.6	A0A402F3Q6	36.0	155.6	no hit	no GO terms	no GO terms	PTHR47027:SF6 (PANTHER); PTHR47027 (PANTHER)	hypothetical protein parPi_0000509	no GO terms	no GO terms
Cnem002416-RA	678	XP_012941331.1	41.3	112.1	no hit	no hit	no hit	no hit	F:GO:0003676; F:GO:0004523	F:nucleic acid binding; F:RNA-DNA hybrid ribonuclease activity	IPR002156 (PFAM); IPR000477 (PFAM); IPR036397 (G3DSA:3.30.420.GENE3D); PTHR33332 (PANTHER); PTHR33332:SF6 (PANTHER); CYTOPLASMIC_DOMAIN (PHOBIUS); TRANSMEMBRANE (PHOBIUS); NON_CYTOPLASMIC_DOMAIN (PHOBIUS); IPR000477 (PROSITE_PROFILES); IPR002156 (PROSITE_PROFILES); IPR012337 (SUPERFAMILY)	hypothetical protein EGW08_003526	P:GO:0090502; F:GO:0003676; F:GO:0004523	P:RNA phosphodiester bond hydrolysis, endonucleolytic; F:nucleic acid binding; F:RNA-DNA hybrid ribonuclease activity
Cnem002434-RA	730	WP_078461487.1;OOY49051.1	45.7	662.1	A0A3S1ASJ4	41.2	545.4	no hit	F:GO:0003676; F:GO:0004523	F:nucleic acid binding; F:RNA-DNA hybrid ribonuclease activity	IPR036397 (G3DSA:3.30.420.GENE3D); IPR000477 (PFAM); IPR002156 (PFAM); mobidb-lite (MOBIDB_LITE); mobidb-lite (MOBIDB_LITE); PTHR33332 (PANTHER); PTHR33332:SF18 (PANTHER); IPR002156 (PROSITE_PROFILES); IPR000477 (PROSITE_PROFILES); cd09276 (CDD); cd01650 (CDD); IPR043502 (SUPERFAMILY); IPR012337 (SUPERFAMILY)	hypothetical protein	no GO terms	no GO terms
Cnem002436-RA	252	XP_013070537.1;XP_013070538.1;XP_013070539.1	60.1	327.8	A0A2C9L184	60.1	327.8	K24141	F:GO:0008289	F:lipid binding	IPR023393 (G3DSA:3.30.530.GENE3D); IPR002913 (PFAM); PTHR19308:SF8 (PANTHER); PTHR19308 (PANTHER); IPR002913 (PROSITE_PROFILES); SSF55961 (SUPERFAMILY)	stAR-related lipid transfer protein 7, mitochondrial-like	F:GO:0008289	F:lipid binding
Cnem002438-RA	188	XP_013070536.1	66.1	267.7	A0A2C9LK89	66.1	267.7	K19602	no GO terms	no GO terms	G3DSA:2.60.200.40 (GENE3D); PTHR12358:SF26 (PANTHER); PTHR12358 (PANTHER); IPR016064 (SUPERFAMILY)	ceramide kinase-like protein	no GO terms	no GO terms
Cnem002439-RA	267	RUS88047.1	49.5	280.4	A0A433U2K7	49.5	280.4	no hit	F:GO:0003951; F:GO:0016301	F:NAD+ kinase activity; F:kinase activity	IPR001206 (PFAM); IPR017438 (G3DSA:3.40.50.GENE3D); PTHR12358:SF26 (PANTHER); PTHR12358 (PANTHER); PTHR12358 (PANTHER); PTHR12358:SF26 (PANTHER); PTHR12358 (PANTHER); PTHR12358:SF26 (PANTHER); IPR001206 (PROSITE_PROFILES); IPR016064 (SUPERFAMILY)	hypothetical protein EGW08_004213	P:GO:0016310; F:GO:0003951; F:GO:0016301	P:phosphorylation; F:NAD+ kinase activity; F:kinase activity
Cnem002444-RA	684	XP_005092362.1	86.8	418.3	A0A2C9JVC2	84.8	411.4	K03036	P:GO:0043248; F:GO:0003676; F:GO:0004523	P:proteasome assembly; F:nucleic acid binding; F:RNA-DNA hybrid ribonuclease activity	IPR002156 (PFAM); IPR000477 (PFAM); IPR040780 (PFAM); G3DSA:1.25.40.570 (GENE3D); IPR000717 (PFAM); PTHR10678 (PANTHER); IPR035295 (PTHR10678:PANTHER); IPR002156 (PROSITE_PROFILES); IPR000717 (PROSITE_PROFILES); IPR000477 (PROSITE_PROFILES); IPR012337 (SUPERFAMILY); IPR036390 (SUPERFAMILY); IPR043502 (SUPERFAMILY)	hypothetical protein EGW08_003526	P:GO:0090502; F:GO:0003676; F:GO:0004523	P:RNA phosphodiester bond hydrolysis, endonucleolytic; F:nucleic acid binding; F:RNA-DNA hybrid ribonuclease activity
Cnem002445-RA	429	XP_013084826.1	95.1	842.8	A0A2C9JVC8	95.1	842.8	no hit	P:GO:0035556; F:GO:0005515	P:intracellular signal transduction; F:protein binding	IPR001496 (PFAM); G3DSA:1.10.750.20 (GENE3D); IPR020683 (PFAM); IPR036770 (G3DSA:1.25.40.GENE3D); IPR036770 (G3DSA:1.25.40.GENE3D); IPR002110 (PFAM); IPR036770 (G3DSA:1.25.40.GENE3D); PTHR24180 (PANTHER); IPR020683 (PROSITE_PROFILES); IPR001496 (PROSITE_PROFILES); IPR002110 (PROSITE_PROFILES); IPR002110 (PROSITE_PROFILES); IPR002110 (PROSITE_PROFILES); IPR002110 (PROSITE_PROFILES); IPR002110 (PRO…	ankyrin repeat and KH domain-containing protein 1-like	P:GO:0035556	P:intracellular signal transduction
Cnem002447-RA	146	no hit	no hit	no hit	no hit	no hit	no hit	no hit	no GO terms	no GO terms	mobidb-lite (MOBIDB_LITE)	---NA---	no GO terms	no GO terms
Cnem002452-RA	333	XP_012937345.1	56.9	367.1	A0A2C9M982	54.1	338.2	K05866	P:GO:0006470; P:GO:1902751; F:GO:0004725	P:protein dephosphorylation; P:positive regulation of cell cycle G2/M phase transition; F:protein tyrosine phosphatase activity	IPR000751 (PRINTS); IPR036873 (G3DSA:3.40.250.GENE3D); IPR001763 (PFAM); mobidb-lite (MOBIDB_LITE); mobidb-lite (MOBIDB_LITE); mobidb-lite (MOBIDB_LITE); PTHR10828:SF64 (PANTHER); PTHR10828 (PANTHER); IPR001763 (PROSITE_PROFILES); IPR000751 (CDD); IPR036873 (SUPERFAMILY)	M-phase inducer phosphatase-like isoform X2	no GO terms	no GO terms
Cnem002453-RA	407	XP_013070591.1	83.7	386.7	A0A2C9JKG7	83.7	386.7	K19041	no GO terms	no GO terms	IPR013083 (G3DSA:3.30.40.GENE3D); IPR001841 (PFAM); mobidb-lite (MOBIDB_LITE); mobidb-lite (MOBIDB_LITE); mobidb-lite (MOBIDB_LITE); PTHR46171 (PANTHER); IPR001841 (PROSITE_PROFILES); cd16472 (CDD); SSF57850 (SUPERFAMILY)	RING finger protein 44-like	no GO terms	no GO terms
Cnem002456-RA	136	no hit	no hit	no hit	no hit	no hit	no hit	no hit	no IPS match	no IPS match	no IPS match	---NA---	no GO terms	no GO terms
Cnem002457-RA	603	RUS88711.1	37.2	383.6	A0A433U4I6	37.2	383.6	no hit	F:GO:0003676; F:GO:0004523	F:nucleic acid binding; F:RNA-DNA hybrid ribonuclease activity	G3DSA:3.10.10.10 (GENE3D); IPR000477 (PFAM); IPR036397 (G3DSA:3.30.420.GENE3D); IPR043128 (G3DSA:3.30.70.GENE3D); IPR002156 (PFAM); PTHR19446 (PANTHER); PTHR19446:SF425 (PANTHER); IPR000477 (PROSITE_PROFILES); IPR002156 (PROSITE_PROFILES); cd09276 (CDD); cd01650 (CDD); IPR043502 (SUPERFAMILY); IPR012337 (SUPERFAMILY)	PREDICTED: uncharacterized protein LOC106013216	no GO terms	no GO terms
Cnem002458-RA	60	no hit	no hit	no hit	no hit	no hit	no hit	no hit	no IPS match	no IPS match	no IPS match	---NA---	no GO terms	no GO terms
Cnem002460-RA	633	XP_005110260.1	61.5	524.2	A0A2C9KPC4	60.6	503.8	K16732	P:GO:0000226; P:GO:0001578; P:GO:0032465; F:GO:0008017; C:GO:0005856	P:microtubule cytoskeleton organization; P:microtubule bundle formation; P:regulation of cytokinesis; F:microtubule binding; C:cytoskeleton	G3DSA:1.20.58.1520 (GENE3D); PF03999 (PFAM); IPR032921 (PTHR19321:PANTHER); IPR007145 (PANTHER)	protein regulator of cytokinesis 1-like isoform X2	no GO terms	no GO terms
Cnem002461-RA	793	GCF41464.1	31.5	297.4	A0A402EBC2	31.5	297.4	no hit	no GO terms	no GO terms	IPR000477 (PFAM); PTHR47027 (PANTHER); PTHR47027:SF6 (PANTHER); IPR000477 (PROSITE_PROFILES); IPR043502 (SUPERFAMILY)	hypothetical protein parPi_0012022	no GO terms	no GO terms
Cnem002466-RA	839	XP_005110255.1;XP_005110256.1	43.3	613.2	A0A433THF9	40.1	529.6	no hit	F:GO:0005515	F:protein binding	IPR000210 (PFAM); IPR027356 (PFAM); G3DSA:3.30.710.10 (GENE3D); mobidb-lite (MOBIDB_LITE); mobidb-lite (MOBIDB_LITE); mobidb-lite (MOBIDB_LITE); mobidb-lite (MOBIDB_LITE); IPR043454 (PANTHER); IPR000210 (PROSITE_PROFILES); cd18312 (CDD); IPR011333 (SUPERFAMILY)	BTB/POZ domain-containing protein At5g03250-like	no GO terms	no GO terms
Cnem002467-RA	242	RUS84333.1	43.8	84.7	A0A3S0ZVZ5	43.8	84.7	no hit	no GO terms	no GO terms	PTHR47027 (PANTHER); PTHR47027:SF6 (PANTHER)	hypothetical protein EGW08_015636	no GO terms	no GO terms
Cnem002468-RA	153	no hit	no hit	no hit	no hit	no hit	no hit	no hit	no IPS match	no IPS match	no IPS match	---NA---	no GO terms	no GO terms
Cnem002470-RA	162	XP_023951013.1	38.5	82.8	A0A402F3Q6	40.7	81.3	no hit	no GO terms	no GO terms	PTHR47027:SF6 (PANTHER); PTHR47027 (PANTHER)	LOW QUALITY PROTEIN: uncharacterized protein LOC112055225	no GO terms	no GO terms
Cnem002471-RA	1329	RUS86294.1	46.9	455.7	A0A3S0ZUP8	46.9	455.7	K09574	F:GO:0003755; F:GO:0005515	F:peptidyl-prolyl cis-trans isomerase activity; F:protein binding	IPR013105 (PFAM); IPR000477 (PFAM); G3DSA:3.10.50.40 (GENE3D); IPR011990 (G3DSA:1.25.40.GENE3D); IPR001179 (PFAM); mobidb-lite (MOBIDB_LITE); mobidb-lite (MOBIDB_LITE); mobidb-lite (MOBIDB_LITE); mobidb-lite (MOBIDB_LITE); mobidb-lite (MOBIDB_LITE); mobidb-lite (MOBIDB_LITE); mobidb-lite (MOBIDB_LITE); mobidb-lite (MOBIDB_LITE); mobidb-lite (MOBIDB_LITE); PTHR46512 (PANTHER); IPR000477 (PROSITE_P…	hypothetical protein EGW08_005938	no GO terms	no GO terms
Cnem002479-RA	688	XP_013086938.1	52.8	696.4	A0A2C9LJF1	52.8	696.4	no hit	P:GO:0007165; F:GO:0005515	P:signal transduction; F:protein binding	IPR035897 (G3DSA:3.40.50.GENE3D); IPR000157 (PFAM); G3DSA:3.40.50.450 (GENE3D); IPR035897 (SUPERFAMILY)	uncharacterized protein LOC106175052	P:GO:0007165	P:signal transduction
Cnem002485-RA	550	XP_005093469.1;XP_005093470.1	49.2	458.0	A0A2C9JZN0	46.2	382.5	K04585	P:GO:0007166; P:GO:0007186; F:GO:0004888; F:GO:0004930; C:GO:0016020; C:GO:0016021	P:cell surface receptor signaling pathway; P:G protein-coupled receptor signaling pathway; F:transmembrane signaling receptor activity; F:G protein-coupled receptor activity; C:membrane; C:integral component of membrane	IPR000832 (PRINTS); G3DSA:1.20.1070.10 (GENE3D); IPR036445 (G3DSA:4.10.1240.GENE3D); IPR000832 (PFAM); PTHR45620 (PANTHER); IPR017981 (PROSITE_PROFILES); cd15272 (CDD)	secretin receptor-like	no GO terms	no GO terms
Cnem002492-RA	317	RUS88711.1	38.3	217.6	A0A433U4I6	38.3	217.6	no hit	F:GO:0003676; F:GO:0004523	F:nucleic acid binding; F:RNA-DNA hybrid ribonuclease activity	IPR036397 (G3DSA:3.30.420.GENE3D); PTHR10642 (PANTHER); PTHR10642:SF0 (PANTHER); IPR002156 (PROSITE_PROFILES); IPR012337 (SUPERFAMILY)	hypothetical protein EGW08_003526	P:GO:0090502; F:GO:0003676; F:GO:0004523	P:RNA phosphodiester bond hydrolysis, endonucleolytic; F:nucleic acid binding; F:RNA-DNA hybrid ribonuclease activity
Cnem002493-RA	205	XP_012936781.1	69.3	224.9	A0A2T7NF91	57.4	186.8	K06773	no GO terms	no GO terms	IPR013098 (PFAM); IPR013783 (G3DSA:2.60.40.GENE3D); PTHR12231:SF157 (PANTHER); PTHR12231 (PANTHER); IPR007110 (PROSITE_PROFILES); cd00096 (CDD); IPR036179 (SUPERFAMILY)	opioid-binding protein/cell adhesion molecule homolog	no GO terms	no GO terms
Cnem002494-RA	116	XP_012936781.1	95.7	144.4	V4ABU9	88.4	136.7	no hit	no GO terms	no GO terms	IPR013783 (G3DSA:2.60.40.GENE3D); PTHR12231 (PANTHER); PTHR12231:SF87 (PANTHER); IPR036179 (SUPERFAMILY)	opioid-binding protein/cell adhesion molecule homolog	no GO terms	no GO terms
Cnem002501-RA	641	RUS88711.1	45.7	455.3	A0A433U4I6	45.7	455.3	no hit	F:GO:0003676; F:GO:0004523	F:nucleic acid binding; F:RNA-DNA hybrid ribonuclease activity	IPR002156 (PFAM); IPR000477 (PFAM); IPR036397 (G3DSA:3.30.420.GENE3D); mobidb-lite (MOBIDB_LITE); mobidb-lite (MOBIDB_LITE); mobidb-lite (MOBIDB_LITE); PTHR33332 (PANTHER); PTHR33332:SF19 (PANTHER); IPR002156 (PROSITE_PROFILES); IPR000477 (PROSITE_PROFILES); cd09276 (CDD); IPR012337 (SUPERFAMILY); IPR043502 (SUPERFAMILY)	hypothetical protein EGW08_003526	P:GO:0090502; F:GO:0003676; F:GO:0004523	P:RNA phosphodiester bond hydrolysis, endonucleolytic; F:nucleic acid binding; F:RNA-DNA hybrid ribonuclease activity
Cnem002503-RA	296	XP_005111261.1	58.9	376.3	A0A2C9K7F4	55.9	361.7	K01540	P:GO:0006813; P:GO:0006814; C:GO:0005890	P:potassium ion transport; P:sodium ion transport; C:sodium:potassium-exchanging ATPase complex	IPR000402 (PFAM); IPR038702 (G3DSA:2.60.40.GENE3D); IPR000402 (PANTHER); NON_CYTOPLASMIC_DOMAIN (PHOBIUS); TRANSMEMBRANE (PHOBIUS); CYTOPLASMIC_DOMAIN (PHOBIUS); TMhelix (TMHMM)	sodium/potassium-transporting ATPase subunit beta-like	no GO terms	no GO terms
Cnem002504-RA	447	PVD34672.1	37.1	265.4	A0A2T7PMN6	37.1	265.4	no hit	no GO terms	no GO terms	Coil (COILS); IPR000477 (PFAM); PTHR33332:SF22 (PANTHER); PTHR33332 (PANTHER); PTHR33332:SF22 (PANTHER); IPR000477 (PROSITE_PROFILES); IPR043502 (SUPERFAMILY)	hypothetical protein C0Q70_05949	no GO terms	no GO terms
Cnem002512-RA	332	RUS88711.1	40.1	249.2	A0A433U4I6	40.1	249.2	no hit	F:GO:0003676; F:GO:0004523	F:nucleic acid binding; F:RNA-DNA hybrid ribonuclease activity	IPR036397 (G3DSA:3.30.420.GENE3D); IPR002156 (PFAM); IPR002156 (PROSITE_PROFILES); IPR012337 (SUPERFAMILY)	hypothetical protein EGW08_008040	P:GO:0090502; F:GO:0003676; F:GO:0004523	P:RNA phosphodiester bond hydrolysis, endonucleolytic; F:nucleic acid binding; F:RNA-DNA hybrid ribonuclease activity
Cnem002516-RA	145	CAA59750.1	61.5	122.5	no hit	no hit	no hit	no hit	no GO terms	no GO terms	mobidb-lite (MOBIDB_LITE); mobidb-lite (MOBIDB_LITE)	putative neuropeptide precursor	P:GO:0007218	P:neuropeptide signaling pathway
Cnem002520-RA	231	CAA59750.1	48.6	109.0	A0A3S1CD12	47.1	82.4	no hit	no GO terms	no GO terms	PTHR47027:SF6 (PANTHER); PTHR47027 (PANTHER)	putative neuropeptide precursor	P:GO:0007218	P:neuropeptide signaling pathway
Cnem002523-RA	415	XP_022202695.1	36.0	268.1	A0A433SZH0	36.5	244.6	no hit	no GO terms	no GO terms	IPR005135 (PFAM); IPR036691 (G3DSA:3.60.10.GENE3D); IPR027124 (PANTHER); PTHR23227:SF62 (PANTHER); SIGNAL_PEPTIDE (PHOBIUS); SIGNAL_PEPTIDE_N_REGION (PHOBIUS); NON_CYTOPLASMIC_DOMAIN (PHOBIUS); SIGNAL_PEPTIDE_H_REGION (PHOBIUS); SIGNAL_PEPTIDE_C_REGION (PHOBIUS); cd09076 (CDD); SignalP-noTM (SIGNALP_EUK); SignalP-TM (SIGNALP_GRAM_POSITIVE); IPR036691 (SUPERFAMILY)	craniofacial development protein 2-like	no GO terms	no GO terms
Cnem002526-RA	949	GCF53027.1	34.6	420.2	A0A402F9C1	34.6	420.2	no hit	no GO terms	no GO terms	Coil (COILS); Coil (COILS); IPR000477 (PFAM); IPR005135 (PFAM); IPR036691 (G3DSA:3.60.10.GENE3D); mobidb-lite (MOBIDB_LITE); mobidb-lite (MOBIDB_LITE); mobidb-lite (MOBIDB_LITE); mobidb-lite (MOBIDB_LITE); mobidb-lite (MOBIDB_LITE); PTHR47027 (PANTHER); PTHR47027:SF6 (PANTHER); IPR000477 (PROSITE_PROFILES); cd09076 (CDD); IPR043502 (SUPERFAMILY); IPR036691 (SUPERFAMILY)	LOW QUALITY PROTEIN: uncharacterized protein LOC110369601	no GO terms	no GO terms
Cnem002527-RA	712	XP_005112007.1	63.9	337.4	A0A2C9JX82	46.0	235.0	K06104	no GO terms	no GO terms	Coil (COILS); Coil (COILS); Coil (COILS); Coil (COILS); IPR009114 (PRINTS); IPR024646 (PFAM); mobidb-lite (MOBIDB_LITE); PTHR14826 (PANTHER)	angiomotin-like 2a isoform X3	no GO terms	no GO terms
Cnem002531-RA	548	XP_013087286.1	54.9	397.1	A0A2C9JX82	54.9	397.1	no hit	no GO terms	no GO terms	Coil (COILS); mobidb-lite (MOBIDB_LITE); mobidb-lite (MOBIDB_LITE); mobidb-lite (MOBIDB_LITE); mobidb-lite (MOBIDB_LITE); mobidb-lite (MOBIDB_LITE); mobidb-lite (MOBIDB_LITE); PTHR14826 (PANTHER)	PREDICTED: angiomotin-like	no GO terms	no GO terms
Cnem002542-RA	162	XP_013081219.1;XP_013081220.1	90.9	227.6	A0A2C9JSU4	90.9	227.6	no hit	F:GO:0005509	F:calcium ion binding	IPR002048 (SMART); IPR002048 (PFAM); G3DSA:1.10.238.10 (GENE3D); G3DSA:1.10.238.10 (GENE3D); PTHR23048 (PANTHER); IPR029655 (PTHR23048:PANTHER); IPR002048 (PROSITE_PROFILES); IPR002048 (CDD); IPR011992 (SUPERFAMILY)	myosin essential light chain, striated adductor muscle-like	F:GO:0005509	F:calcium ion binding
Cnem002544-RA	134	GBL67191.1	49.2	63.2	A0A087TX40	55.8	62.8	no hit	F:GO:0003677	F:DNA binding	PF13551 (PFAM); mobidb-lite (MOBIDB_LITE); mobidb-lite (MOBIDB_LITE); IPR009057 (SUPERFAMILY)	hypothetical protein X975_20608, partial	P:GO:0006355; F:GO:0003677	P:regulation of transcription, DNA-templated; F:DNA binding
Cnem002545-RA	420	XP_005103854.2	70.5	404.4	A0A2C9L8J5	63.2	354.4	no hit	F:GO:0005515	F:protein binding	Coil (COILS); SM00368 (SMART); IPR001611 (PFAM); IPR032675 (G3DSA:3.80.10.GENE3D); IPR032675 (G3DSA:3.80.10.GENE3D); mobidb-lite (MOBIDB_LITE); mobidb-lite (MOBIDB_LITE); mobidb-lite (MOBIDB_LITE); mobidb-lite (MOBIDB_LITE); PTHR24107:SF18 (PANTHER); PTHR24107 (PANTHER); SSF52047 (SUPERFAMILY)	PREDICTED: uncharacterized protein LOC101855660	no GO terms	no GO terms
Cnem002550-RA	288	RUS75834.1	41.8	118.6	A0A433T2Q7	41.8	118.6	no hit	no GO terms	no GO terms	Coil (COILS); Coil (COILS); mobidb-lite (MOBIDB_LITE); mobidb-lite (MOBIDB_LITE)	hypothetical protein EGW08_016403	no GO terms	no GO terms
Cnem002551-RA	669	RUS86973.1	60.7	129.8	A0A3S1BMC1	60.7	129.8	K02875	P:GO:0006412; F:GO:0003723; F:GO:0003735; C:GO:0005840	P:translation; F:RNA binding; F:structural constituent of ribosome; C:ribosome	Coil (COILS); IPR002784 (PFAM); IPR014722 (G3DSA:2.30.30.GENE3D); IPR036514 (G3DSA:3.40.50.GENE3D); mobidb-lite (MOBIDB_LITE); mobidb-lite (MOBIDB_LITE); mobidb-lite (MOBIDB_LITE); mobidb-lite (MOBIDB_LITE); mobidb-lite (MOBIDB_LITE); IPR039660 (PANTHER); cd00229 (CDD); IPR041985 (CDD); SSF52266 (SUPERFAMILY); IPR008991 (SUPERFAMILY)	60S ribosomal protein L14	no GO terms	no GO terms
Cnem002553-RA	229	WP_078461487.1;OOY49051.1	39.0	98.6	A0A3S1BR16	34.7	87.0	no hit	F:GO:0003676; F:GO:0004523	F:nucleic acid binding; F:RNA-DNA hybrid ribonuclease activity	IPR036397 (G3DSA:3.30.420.GENE3D); mobidb-lite (MOBIDB_LITE); mobidb-lite (MOBIDB_LITE); mobidb-lite (MOBIDB_LITE); mobidb-lite (MOBIDB_LITE); IPR002156 (PROSITE_PROFILES); IPR012337 (SUPERFAMILY)	ribonuclease H1-like	no GO terms	no GO terms
Cnem002558-RA	497	RUS88711.1	47.2	386.3	A0A433U4I6	47.2	386.3	no hit	F:GO:0003676; F:GO:0004523	F:nucleic acid binding; F:RNA-DNA hybrid ribonuclease activity	IPR000477 (PFAM); PTHR33332 (PANTHER); PTHR33332:SF6 (PANTHER); IPR002156 (PROSITE_PROFILES); IPR000477 (PROSITE_PROFILES)	hypothetical protein EGW08_003526	P:GO:0090502; F:GO:0003676; F:GO:0004523	P:RNA phosphodiester bond hydrolysis, endonucleolytic; F:nucleic acid binding; F:RNA-DNA hybrid ribonuclease activity
Cnem002569-RA	215	no hit	no hit	no hit	no hit	no hit	no hit	no hit	no GO terms	no GO terms	Coil (COILS); mobidb-lite (MOBIDB_LITE); mobidb-lite (MOBIDB_LITE); mobidb-lite (MOBIDB_LITE)	hypothetical protein AC249_AIPGENE15317	no GO terms	no GO terms
Cnem002571-RA	381	RUS91071.1	45.3	255.4	A0A433UB71	45.3	255.4	no hit	no IPS match	no IPS match	no IPS match	hypothetical protein EGW08_001199	no GO terms	no GO terms
Cnem002572-RA	161	no hit	no hit	no hit	no hit	no hit	no hit	no hit	no IPS match	no IPS match	no IPS match	uncharacterized protein LOC115244774	no GO terms	no GO terms
Cnem002575-RA	286	RUS88711.1	37.2	85.1	A0A433U4I6	37.2	85.1	no hit	F:GO:0003676; F:GO:0004523	F:nucleic acid binding; F:RNA-DNA hybrid ribonuclease activity	mobidb-lite (MOBIDB_LITE); mobidb-lite (MOBIDB_LITE); IPR002156 (PROSITE_PROFILES)	hypothetical protein EGW08_003526	P:GO:0090502; F:GO:0003676; F:GO:0004523	P:RNA phosphodiester bond hydrolysis, endonucleolytic; F:nucleic acid binding; F:RNA-DNA hybrid ribonuclease activity
Cnem002587-RA	171	XP_009044478.1;ESP04969.1	54.1	104.4	V4AL94	54.1	104.4	no hit	no GO terms	no GO terms	G3DSA:1.20.1070.10 (GENE3D); CYTOPLASMIC_DOMAIN (PHOBIUS); CYTOPLASMIC_DOMAIN (PHOBIUS); TRANSMEMBRANE (PHOBIUS); NON_CYTOPLASMIC_DOMAIN (PHOBIUS); TRANSMEMBRANE (PHOBIUS); cd14978 (CDD); SSF81321 (SUPERFAMILY); TMhelix (TMHMM)	hypothetical protein LOTGIDRAFT_109748	P:GO:0007186; F:GO:0004930; C:GO:0016021	P:G protein-coupled receptor signaling pathway; F:G protein-coupled receptor activity; C:integral component of membrane
Cnem002606-RA	908	XP_025085055.1	50.6	1004.2	A0A3S1B9P2	50.0	882.9	no hit	no GO terms	no GO terms	PTHR31511 (PANTHER); PTHR31511:SF12 (PANTHER); IPR043502 (SUPERFAMILY)	uncharacterized protein LOC112558684 isoform X2	no GO terms	no GO terms
Cnem002607-RA	429	XP_025086933.1	41.2	225.7	A0A3S1B9P2	30.0	141.7	no hit	no GO terms	no GO terms	IPR013087 (SMART); G3DSA:3.30.160.60 (GENE3D); mobidb-lite (MOBIDB_LITE); mobidb-lite (MOBIDB_LITE); mobidb-lite (MOBIDB_LITE); PTHR24393 (PANTHER); PTHR24393:SF21 (PANTHER); IPR013087 (PROSITE_PATTERNS); IPR013087 (PROSITE_PATTERNS); IPR013087 (PROSITE_PROFILES); IPR013087 (PROSITE_PROFILES); IPR036236 (SUPERFAMILY)	uncharacterized protein LOC112558684 isoform X2	no GO terms	no GO terms
Cnem002608-RA	144	XP_005103996.1	46.5	149.4	X1WLI7	29.4	63.5	no hit	no IPS match	no IPS match	no IPS match	RNA-directed DNA polymerase from mobile element jockey-like	no GO terms	no GO terms
Cnem002610-RA	400	RUS88711.1	34.1	181.0	A0A433U4I6	34.1	181.0	no hit	no GO terms	no GO terms	PTHR47027:SF6 (PANTHER); PTHR47027 (PANTHER)	hypothetical protein EGW08_003526	P:GO:0090502; F:GO:0003676; F:GO:0004523	P:RNA phosphodiester bond hydrolysis, endonucleolytic; F:nucleic acid binding; F:RNA-DNA hybrid ribonuclease activity
Cnem002625-RA	332	XP_032675526.1	26.6	67.0	no hit	no hit	no hit	no hit	no IPS match	no IPS match	no IPS match	hypothetical protein EGW08_012163	P:GO:0090502; F:GO:0003676; F:GO:0004523	P:RNA phosphodiester bond hydrolysis, endonucleolytic; F:nucleic acid binding; F:RNA-DNA hybrid ribonuclease activity
Cnem002626-RA	374	XP_019622270.1	35.2	189.9	A0A2C9L4U2	33.3	172.2	no hit	no GO terms	no GO terms	IPR036691 (G3DSA:3.60.10.GENE3D); PTHR47027 (PANTHER); PTHR47027:SF6 (PANTHER); IPR036691 (SUPERFAMILY)	hypothetical protein EGW08_002896	F:GO:0005524; C:GO:0016021	F:ATP binding; C:integral component of membrane
Cnem002633-RA	1684	WP_144078600.1	42.4	943.7	W4XIZ8	28.7	533.9	no hit	P:GO:0015074; F:GO:0003676	P:DNA integration; F:nucleic acid binding	Coil (COILS); Coil (COILS); IPR043128 (G3DSA:3.30.70.GENE3D); IPR018061 (PFAM); IPR036397 (G3DSA:3.30.420.GENE3D); IPR043128 (G3DSA:3.30.70.GENE3D); G3DSA:1.10.340.70 (GENE3D); IPR021109 (G3DSA:2.40.70.GENE3D); G3DSA:3.10.20.370 (GENE3D); IPR041373 (PFAM); IPR041588 (PFAM); IPR001584 (PFAM); IPR000477 (PFAM); G3DSA:3.10.10.10 (GENE3D); mobidb-lite (MOBIDB_LITE); mobidb-lite (MOBIDB_LITE); mobidb-…	DDE-type integrase/transposase/recombinase	no GO terms	no GO terms
Cnem002646-RA	599	XP_013077643.1	22.2	119.4	A0A2C9KIG8	22.6	114.8	no hit	no GO terms	no GO terms	NON_CYTOPLASMIC_DOMAIN (PHOBIUS); SIGNAL_PEPTIDE_C_REGION (PHOBIUS); SIGNAL_PEPTIDE (PHOBIUS); SIGNAL_PEPTIDE_H_REGION (PHOBIUS); SIGNAL_PEPTIDE_N_REGION (PHOBIUS); SignalP-noTM (SIGNALP_EUK)	putative GPI-anchored protein PB15E9.01c isoform X1	no GO terms	no GO terms
Cnem002651-RA	409	XP_005105697.2	34.8	242.7	A0A2T7P025	27.9	169.1	no hit	no GO terms	no GO terms	Coil (COILS); IPR003593 (SMART); mobidb-lite (MOBIDB_LITE); PTHR19860 (PANTHER); PTHR19860:SF36 (PANTHER); PTHR19860 (PANTHER); PTHR19860:SF36 (PANTHER); IPR027417 (SUPERFAMILY); SSF81995 (SUPERFAMILY)	TPR repeat-containing protein DDB_G0287407-like	no GO terms	no GO terms
Cnem002652-RA	520	XP_005105697.2	53.9	286.2	A0A3S1C6Q0	50.6	261.2	K10407	F:GO:0005515	F:protein binding	IPR019734 (SMART); IPR011990 (G3DSA:1.25.40.GENE3D); IPR011990 (G3DSA:1.25.40.GENE3D); PF13424 (PFAM); PTHR47027:SF5 (PANTHER); PTHR47027 (PANTHER); IPR019734 (PROSITE_PROFILES); IPR019734 (PROSITE_PROFILES); IPR019734 (PROSITE_PROFILES); IPR013026 (PROSITE_PROFILES); IPR011990 (SUPERFAMILY)	TPR repeat-containing protein DDB_G0287407-like	no GO terms	no GO terms
Cnem002654-RA	111	SMN17638.1	46.5	97.4	D6WQK2	40.8	78.6	no hit	no IPS match	no IPS match	no IPS match	hypothetical protein CRYPA_1248	P:GO:0019073	P:viral DNA genome packaging
Cnem002657-RA	715	RUS88711.1	40.1	434.9	A0A433U4I6	40.1	434.9	no hit	F:GO:0003676; F:GO:0004523	F:nucleic acid binding; F:RNA-DNA hybrid ribonuclease activity	IPR000477 (PFAM); IPR036397 (G3DSA:3.30.420.GENE3D); IPR002156 (PFAM); IPR036397 (G3DSA:3.30.420.GENE3D); PTHR10642:SF0 (PANTHER); PTHR10642 (PANTHER); NON_CYTOPLASMIC_DOMAIN (PHOBIUS); CYTOPLASMIC_DOMAIN (PHOBIUS); TRANSMEMBRANE (PHOBIUS); IPR000477 (PROSITE_PROFILES); IPR002156 (PROSITE_PROFILES); IPR002156 (PROSITE_PROFILES); IPR012337 (SUPERFAMILY); IPR043502 (SUPERFAMILY); IPR012337 (SUPERFA…	hypothetical protein EGW08_003526	P:GO:0090502; F:GO:0003676; F:GO:0004523	P:RNA phosphodiester bond hydrolysis, endonucleolytic; F:nucleic acid binding; F:RNA-DNA hybrid ribonuclease activity
Cnem002658-RA	408	XP_012942036.1;XP_012942037.1;XP_012942038.1;XP_012942039.1;XP_012942040.1	79.2	95.1	A0A3S0ZW59	79.2	92.4	no hit	no GO terms	no GO terms	Coil (COILS); mobidb-lite (MOBIDB_LITE); mobidb-lite (MOBIDB_LITE); mobidb-lite (MOBIDB_LITE)	---NA---	no GO terms	no GO terms
Cnem002659-RA	709	OOZ58401.1	39.0	407.5	A0A2G8K4T3	35.8	236.9	no hit	no GO terms	no GO terms	Coil (COILS); IPR041588 (PFAM); IPR043128 (G3DSA:3.30.70.GENE3D); G3DSA:1.10.340.70 (GENE3D); IPR041373 (PFAM); G3DSA:3.10.20.370 (GENE3D); G3DSA:3.10.10.10 (GENE3D); mobidb-lite (MOBIDB_LITE); mobidb-lite (MOBIDB_LITE); mobidb-lite (MOBIDB_LITE); mobidb-lite (MOBIDB_LITE); PTHR24559:SF269 (PANTHER); PTHR24559 (PANTHER); PTHR24559:SF269 (PANTHER); PTHR24559 (PANTHER); cd01647 (CDD); cd09274 (CDD)…	hypothetical protein BOW41_12565, partial	no GO terms	no GO terms
Cnem002663-RA	413	XP_013074039.1	32.5	144.8	A0A2C9LZU1	32.5	144.8	no hit	P:GO:0006355; F:GO:0003700	P:regulation of transcription, DNA-templated; F:DNA-binding transcription factor activity	Coil (COILS); IPR003309 (PFAM); mobidb-lite (MOBIDB_LITE); mobidb-lite (MOBIDB_LITE); mobidb-lite (MOBIDB_LITE); PTHR46888 (PANTHER); SSF47353 (SUPERFAMILY)	uncharacterized protein LOC110448095	no GO terms	no GO terms
Cnem002664-RA	328	XP_013076812.1;XP_013076814.1	63.8	397.9	A0A2C9K7Q0	63.8	397.9	K06107	C:GO:0005856	C:cytoskeleton	IPR014847 (SMART); IPR018980 (SMART); IPR014352 (G3DSA:1.20.80.GENE3D); IPR018980 (PFAM); IPR011993 (G3DSA:2.30.29.GENE3D); IPR019748 (PFAM); IPR014847 (PFAM); mobidb-lite (MOBIDB_LITE); mobidb-lite (MOBIDB_LITE); mobidb-lite (MOBIDB_LITE); PTHR23280 (PANTHER); IPR000299 (PROSITE_PROFILES); IPR019748 (CDD); IPR035963 (SUPERFAMILY); SSF50729 (SUPERFAMILY)	protein 4.1-like	F:GO:0008092; C:GO:0005856	F:cytoskeletal protein binding; C:cytoskeleton
Cnem002670-RA	625	XP_013089665.1	87.4	1150.2	A0A2C9JZ13	87.4	1150.2	no hit	F:GO:0005515	F:protein binding	IPR011705 (SMART); IPR000210 (SMART); IPR006652 (SMART); IPR011705 (PFAM); G3DSA:3.30.710.10 (GENE3D); IPR015915 (G3DSA:2.120.10.GENE3D); IPR006652 (PFAM); IPR017096 (PIRSF); G3DSA:1.25.40.420 (GENE3D); IPR000210 (PFAM); PTHR24412 (PANTHER); IPR000210 (PROSITE_PROFILES); cd18238 (CDD); cd18445 (CDD); IPR015915 (SUPERFAMILY); IPR011333 (SUPERFAMILY)	kelch-like protein 28	no GO terms	no GO terms
Cnem002673-RA	321	XP_005101481.1	60.0	364.4	A0A433TAD2	56.2	346.7	K11165	no GO terms	no GO terms	IPR002347 (PRINTS); IPR002347 (PFAM); G3DSA:3.40.50.720 (GENE3D); PTHR44269 (PANTHER); SIGNAL_PEPTIDE_N_REGION (PHOBIUS); SIGNAL_PEPTIDE_H_REGION (PHOBIUS); NON_CYTOPLASMIC_DOMAIN (PHOBIUS); SIGNAL_PEPTIDE_C_REGION (PHOBIUS); SIGNAL_PEPTIDE (PHOBIUS); cd05332 (CDD); IPR036291 (SUPERFAMILY); TMhelix (TMHMM)	dehydrogenase/reductase SDR family member 7-like	no GO terms	no GO terms
Cnem002674-RA	1390	WP_144078600.1	43.1	934.5	W4XIZ7	31.1	523.5	no hit	P:GO:0006508; P:GO:0015074; F:GO:0003676; F:GO:0004190	P:proteolysis; P:DNA integration; F:nucleic acid binding; F:aspartic-type endopeptidase activity	Coil (COILS); Coil (COILS); IPR001584 (PFAM); G3DSA:3.10.10.10 (GENE3D); IPR041373 (PFAM); IPR000477 (PFAM); IPR041588 (PFAM); IPR036397 (G3DSA:3.30.420.GENE3D); PF13975 (PFAM); G3DSA:1.10.340.70 (GENE3D); IPR021109 (G3DSA:2.40.70.GENE3D); IPR043128 (G3DSA:3.30.70.GENE3D); IPR043128 (G3DSA:3.30.70.GENE3D); G3DSA:3.10.20.370 (GENE3D); mobidb-lite (MOBIDB_LITE); mobidb-lite (MOBIDB_LITE); mobidb-li…	DDE-type integrase/transposase/recombinase	no GO terms	no GO terms
Cnem002678-RA	496	RUS75926.1	30.4	185.7	A0A3S0ZV17	30.4	185.7	no hit	no GO terms	no GO terms	PTHR47027 (PANTHER); PTHR47027:SF5 (PANTHER)	hypothetical protein EGW08_016905	no GO terms	no GO terms
Cnem002684-RA	650	PIK46132.1	31.7	94.4	A0A2G8KDS2	31.7	94.4	no hit	P:GO:0042981	P:regulation of apoptotic process	IPR036834 (G3DSA:1.10.437.GENE3D); PTHR47027 (PANTHER); IPR002475 (PROSITE_PROFILES); IPR036834 (SUPERFAMILY)	hypothetical protein C0Q70_20623	no GO terms	no GO terms
Cnem002688-RA	32	no hit	no hit	no hit	no hit	no hit	no hit	no hit	no IPS match	no IPS match	no IPS match	---NA---	no GO terms	no GO terms
Cnem002694-RA	317	XP_023703070.1	46.2	97.1	A0A087UNA1	42.6	79.3	no hit	F:GO:0003676; F:GO:0004523	F:nucleic acid binding; F:RNA-DNA hybrid ribonuclease activity	IPR036397 (G3DSA:3.30.420.GENE3D); IPR002156 (PROSITE_PROFILES); IPR012337 (SUPERFAMILY)	hypothetical protein EGW08_008040	P:GO:0090502; F:GO:0003676; F:GO:0004523	P:RNA phosphodiester bond hydrolysis, endonucleolytic; F:nucleic acid binding; F:RNA-DNA hybrid ribonuclease activity
Cnem002695-RA	192	XP_012936108.1	48.4	177.9	A0A2C9JWT9	42.0	157.9	no hit	F:GO:0005515	F:protein binding	G3DSA:3.30.60.30 (GENE3D); IPR000884 (PFAM); IPR036383 (G3DSA:2.20.100.GENE3D); G3DSA:3.30.60.30 (GENE3D); IPR002350 (PFAM); PTHR10913:SF64 (PANTHER); PTHR10913 (PANTHER); IPR000884 (PROSITE_PROFILES); IPR002350 (PROSITE_PROFILES); IPR002350 (PROSITE_PROFILES); IPR036058 (SUPERFAMILY); IPR036058 (SUPERFAMILY); IPR036383 (SUPERFAMILY)	PREDICTED: fibrillin-1-like	F:GO:0005509	F:calcium ion binding
Cnem002698-RA	348	XP_012935768.1	62.1	288.5	A0A2T7PQS5	39.1	266.2	K12562	F:GO:0005515; C:GO:0005737	F:protein binding; C:cytoplasm	IPR003005 (PRINTS); IPR004148 (PFAM); G3DSA:2.30.30.40 (GENE3D); IPR027267 (G3DSA:1.20.1270.GENE3D); mobidb-lite (MOBIDB_LITE); mobidb-lite (MOBIDB_LITE); mobidb-lite (MOBIDB_LITE); PTHR46514 (PANTHER); IPR004148 (PROSITE_PROFILES); IPR027267 (SUPERFAMILY); IPR036028 (SUPERFAMILY)	myc box-dependent-interacting protein 1-like isoform X5	no GO terms	no GO terms
Cnem002704-RA	87	XP_005104101.1	66.7	128.6	A0A2C9KQZ6	59.8	119.8	K03948	no GO terms	no GO terms	IPR010530 (PFAM); PTHR14256:SF4 (PANTHER); IPR010530 (PANTHER)	cytochrome c oxidase subunit NDUFA4-like	no GO terms	no GO terms
Cnem002706-RA	462	RUS80298.1	28.1	177.2	A0A3S1BGM8	28.1	177.2	no hit	no GO terms	no GO terms	mobidb-lite (MOBIDB_LITE); IPR009003 (SUPERFAMILY); IPR009003 (SUPERFAMILY)	hypothetical protein EGW08_011936	no GO terms	no GO terms
Cnem002720-RA	151	KDR10706.1	40.2	80.9	A0A067QQ57	40.2	80.9	no hit	no IPS match	no IPS match	no IPS match	hypothetical protein L798_15468	no GO terms	no GO terms
Cnem002731-RA	392	XP_013071948.1	84.0	657.5	A0A2C9LW52	84.0	657.5	no hit	no GO terms	no GO terms	IPR036005 (G3DSA:3.90.230.GENE3D); IPR000994 (PFAM); IPR004545 (TIGRFAM); IPR036388 (G3DSA:1.10.10.GENE3D); PTHR10804:SF11 (PANTHER); PTHR10804 (PANTHER); cd01089 (CDD); IPR036005 (SUPERFAMILY); IPR036390 (SUPERFAMILY)	proliferation-associated protein 2G4-like	no GO terms	no GO terms
Cnem002733-RA	657	XP_029652353.1	57.9	729.2	X1WW20	55.7	701.0	no hit	no GO terms	no GO terms	G3DSA:3.30.160.60 (GENE3D); G3DSA:3.30.160.60 (GENE3D); G3DSA:3.30.160.60 (GENE3D); IPR013087 (PFAM); PF13912 (PFAM); G3DSA:3.30.160.60 (GENE3D); G3DSA:3.30.160.60 (GENE3D); G3DSA:3.30.160.60 (GENE3D); G3DSA:3.30.160.60 (GENE3D); PTHR24377 (PANTHER); PTHR24377:SF867 (PANTHER); PTHR24377 (PANTHER); PTHR24377:SF867 (PANTHER); PTHR24377:SF867 (PANTHER); PTHR24377 (PANTHER); PTHR24377:SF867 (PANTHER)…	zinc finger protein 208-like	no GO terms	no GO terms
Cnem002734-RA	508	XP_014677047.1	41.5	354.4	W4Y5A2	40.6	346.7	no hit	no GO terms	no GO terms	IPR000477 (PFAM); PTHR47027 (PANTHER); PTHR47027:SF6 (PANTHER); IPR000477 (PROSITE_PROFILES); IPR043502 (SUPERFAMILY)	PREDICTED: uncharacterized protein LOC106816918	no GO terms	no GO terms
Cnem002737-RA	497	XP_029652353.1	58.8	544.3	J9L823	58.6	536.6	no hit	no GO terms	no GO terms	G3DSA:3.30.160.60 (GENE3D); G3DSA:3.30.160.60 (GENE3D); IPR013087 (PFAM); G3DSA:3.30.160.60 (GENE3D); PF13912 (PFAM); G3DSA:3.30.160.60 (GENE3D); G3DSA:3.30.160.60 (GENE3D); PTHR24384:SF110 (PANTHER); PTHR24384 (PANTHER); PTHR24384:SF110 (PANTHER); PTHR24384 (PANTHER); PTHR24384:SF110 (PANTHER); PTHR24384 (PANTHER); IPR013087 (PROSITE_PROFILES); IPR013087 (PROSITE_PROFILES); IPR013087 (PROSITE_PR…	zinc finger protein 271-like	no GO terms	no GO terms
Cnem002744-RA	600	XP_029652353.1	61.7	832.0	A0A0L8FJB7	60.5	820.5	no hit	no GO terms	no GO terms	PF13912 (PFAM); G3DSA:3.30.160.60 (GENE3D); IPR013087 (PFAM); G3DSA:3.30.160.60 (GENE3D); G3DSA:3.30.160.60 (GENE3D); G3DSA:3.30.160.60 (GENE3D); PTHR24394 (PANTHER); PTHR24394:SF27 (PANTHER); PTHR24394:SF27 (PANTHER); PTHR24394 (PANTHER); PTHR24394:SF27 (PANTHER); PTHR24394:SF27 (PANTHER); PTHR24394 (PANTHER); PTHR24394 (PANTHER); IPR013087 (PROSITE_PROFILES); IPR013087 (PROSITE_PROFILES); IPR01…	zinc finger protein 208-like	no GO terms	no GO terms
Cnem002745-RA	352	XP_013071949.1;XP_013071950.1	81.6	322.4	A0A2C9JLI6	81.6	322.4	K12741	F:GO:0003676; F:GO:0003729	F:nucleic acid binding; F:mRNA binding	IPR000504 (PFAM); IPR012677 (G3DSA:3.30.70.GENE3D); IPR012677 (G3DSA:3.30.70.GENE3D); mobidb-lite (MOBIDB_LITE); mobidb-lite (MOBIDB_LITE); mobidb-lite (MOBIDB_LITE); mobidb-lite (MOBIDB_LITE); IPR037366 (PANTHER); PTHR11176:SF13 (PANTHER); IPR037366 (PANTHER); IPR000504 (PROSITE_PROFILES); IPR000504 (PROSITE_PROFILES); cd12578 (CDD); IPR035979 (SUPERFAMILY); IPR035979 (SUPERFAMILY)	heterogeneous nuclear ribonucleoprotein A1-like isoform X1	F:GO:0003729	F:mRNA binding
Cnem002749-RA	406	XP_013083499.1	91.1	703.0	A0A2C9JUC2	91.1	703.0	K10523	F:GO:0005515	F:protein binding	G3DSA:1.25.40.420 (GENE3D); IPR002083 (PFAM); G3DSA:3.30.710.10 (GENE3D); IPR000210 (PFAM); IPR008974 (G3DSA:2.60.210.GENE3D); mobidb-lite (MOBIDB_LITE); PTHR24413:SF97 (PANTHER); PTHR24413 (PANTHER); IPR002083 (PROSITE_PROFILES); IPR000210 (PROSITE_PROFILES); cd18345 (CDD); cd18520 (CDD); IPR011333 (SUPERFAMILY); IPR008974 (SUPERFAMILY)	hypothetical protein EGW08_016345	no GO terms	no GO terms
Cnem002752-RA	582	RUS85319.1	44.8	524.2	A0A3S1BCT8	44.8	524.2	no hit	F:GO:0003676; F:GO:0004523	F:nucleic acid binding; F:RNA-DNA hybrid ribonuclease activity	IPR036397 (G3DSA:3.30.420.GENE3D); IPR000477 (PFAM); PTHR33332 (PANTHER); PTHR33332:SF21 (PANTHER); IPR000477 (PROSITE_PROFILES); IPR002156 (PROSITE_PROFILES); cd01650 (CDD); IPR043502 (SUPERFAMILY); IPR012337 (SUPERFAMILY)	hypothetical protein EGW08_006920	P:GO:0090502; F:GO:0003676; F:GO:0004523	P:RNA phosphodiester bond hydrolysis, endonucleolytic; F:nucleic acid binding; F:RNA-DNA hybrid ribonuclease activity
Cnem002753-RA	151	no hit	no hit	no hit	no hit	no hit	no hit	no hit	no IPS match	no IPS match	no IPS match	---NA---	no GO terms	no GO terms
Cnem002763-RA	406	XP_020608950.1	48.4	207.6	A7T9Q9	50.5	178.7	no hit	F:GO:0003676; F:GO:0004523	F:nucleic acid binding; F:RNA-DNA hybrid ribonuclease activity	IPR036397 (G3DSA:3.30.420.GENE3D); IPR002156 (PFAM); PTHR10642 (PANTHER); PTHR10642:SF0 (PANTHER); IPR002156 (PROSITE_PROFILES); cd09276 (CDD); IPR012337 (SUPERFAMILY)	protocadherin Fat 1-like	no GO terms	no GO terms
Cnem002768-RA	251	XP_005089773.2	79.2	408.3	A0A433SR67	74.2	387.1	K05026	F:GO:0005515	F:protein binding	PF13410 (PFAM); IPR036249 (G3DSA:3.40.30.GENE3D); G3DSA:1.20.1050.10 (GENE3D); IPR004045 (PFAM); PTHR43920:SF5 (PANTHER); PTHR43920 (PANTHER); cd03198 (CDD); IPR036282 (SUPERFAMILY); IPR036249 (SUPERFAMILY)	chloride intracellular channel protein 1-like	no GO terms	no GO terms
Cnem002769-RA	128	no hit	no hit	no hit	no hit	no hit	no hit	no hit	no GO terms	no GO terms	Coil (COILS); mobidb-lite (MOBIDB_LITE); mobidb-lite (MOBIDB_LITE); mobidb-lite (MOBIDB_LITE)	---NA---	no GO terms	no GO terms
Cnem002770-RA	174	RUS88711.1	32.3	110.2	A0A3S0ZQ40	32.3	110.2	no hit	F:GO:0003676; F:GO:0004523	F:nucleic acid binding; F:RNA-DNA hybrid ribonuclease activity	IPR036397 (G3DSA:3.30.420.GENE3D); IPR002156 (PROSITE_PROFILES); IPR012337 (SUPERFAMILY)	hypothetical protein EGW08_003526	P:GO:0090502; F:GO:0003676; F:GO:0004523	P:RNA phosphodiester bond hydrolysis, endonucleolytic; F:nucleic acid binding; F:RNA-DNA hybrid ribonuclease activity
Cnem002771-RA	111	no hit	no hit	no hit	no hit	no hit	no hit	no hit	no GO terms	no GO terms	Coil (COILS); mobidb-lite (MOBIDB_LITE); mobidb-lite (MOBIDB_LITE); mobidb-lite (MOBIDB_LITE)	---NA---	no GO terms	no GO terms
Cnem002774-RA	463	WP_078461487.1;OOY49051.1	45.4	245.0	A0A433TJU2	41.4	228.0	no hit	F:GO:0003676; F:GO:0004523	F:nucleic acid binding; F:RNA-DNA hybrid ribonuclease activity	IPR002156 (PFAM); IPR036397 (G3DSA:3.30.420.GENE3D); IPR036397 (G3DSA:3.30.420.GENE3D); PTHR10642 (PANTHER); IPR002156 (PROSITE_PROFILES); IPR002156 (PROSITE_PROFILES); cd09276 (CDD); IPR012337 (SUPERFAMILY); IPR012337 (SUPERFAMILY)	uncharacterized protein LOC111106094	no GO terms	no GO terms
Cnem002776-RA	361	XP_005100833.1	61.9	439.5	A0A433T1M0	54.9	434.9	K12310	P:GO:0005975; F:GO:0008061	P:carbohydrate metabolic process; F:chitin binding	IPR011583 (SMART); IPR029070 (G3DSA:3.10.50.GENE3D); IPR001223 (PFAM); G3DSA:3.20.20.80 (GENE3D); PTHR46290 (PANTHER); PTHR46290:SF1 (PANTHER); IPR017853 (SUPERFAMILY)	PREDICTED: di-N-acetylchitobiase-like	no GO terms	no GO terms
Cnem002777-RA	300	XP_012935645.1	29.1	138.7	C3ZYD8	33.0	106.3	no hit	no GO terms	no GO terms	IPR036691 (G3DSA:3.60.10.GENE3D); mobidb-lite (MOBIDB_LITE); IPR027124 (PANTHER); PTHR23227:SF62 (PANTHER); IPR036691 (SUPERFAMILY)	craniofacial development protein 2-like	no GO terms	no GO terms
Cnem002780-RA	375	WP_078461487.1;OOY49051.1	42.7	279.6	A0A3S0ZTJ0	40.5	262.3	no hit	F:GO:0003676; F:GO:0004523	F:nucleic acid binding; F:RNA-DNA hybrid ribonuclease activity	IPR002156 (PFAM); IPR036397 (G3DSA:3.30.420.GENE3D); PTHR10642 (PANTHER); IPR002156 (PROSITE_PROFILES); cd09276 (CDD); IPR012337 (SUPERFAMILY)	hypothetical protein	no GO terms	no GO terms
Cnem002786-RA	666	RUS88711.1	49.3	553.1	A0A433U4I6	49.3	553.1	no hit	F:GO:0003676; F:GO:0004523	F:nucleic acid binding; F:RNA-DNA hybrid ribonuclease activity	IPR000477 (PFAM); IPR036397 (G3DSA:3.30.420.GENE3D); IPR002156 (PFAM); PTHR33332:SF10 (PANTHER); PTHR33332 (PANTHER); CYTOPLASMIC_DOMAIN (PHOBIUS); NON_CYTOPLASMIC_DOMAIN (PHOBIUS); TRANSMEMBRANE (PHOBIUS); IPR000477 (PROSITE_PROFILES); IPR002156 (PROSITE_PROFILES); IPR043502 (SUPERFAMILY); IPR012337 (SUPERFAMILY)	hypothetical protein EGW08_003526	P:GO:0090502; F:GO:0003676; F:GO:0004523	P:RNA phosphodiester bond hydrolysis, endonucleolytic; F:nucleic acid binding; F:RNA-DNA hybrid ribonuclease activity
Cnem002789-RA	394	RUS75316.1	33.2	205.7	A0A3P8TFH9	41.4	137.1	no hit	no GO terms	no GO terms	IPR000477 (PFAM); PTHR47027 (PANTHER); IPR000477 (PROSITE_PROFILES); IPR043502 (SUPERFAMILY)	hypothetical protein EGW08_016905	no GO terms	no GO terms
Cnem002790-RA	874	XP_013094417.1	34.8	358.6	A0A2C9KVN3	34.8	358.6	no hit	F:GO:0005515	F:protein binding	IPR003599 (SMART); IPR002172 (SMART); IPR002172 (PFAM); IPR013783 (G3DSA:2.60.40.GENE3D); IPR036055 (G3DSA:4.10.400.GENE3D); mobidb-lite (MOBIDB_LITE); mobidb-lite (MOBIDB_LITE); mobidb-lite (MOBIDB_LITE); mobidb-lite (MOBIDB_LITE); mobidb-lite (MOBIDB_LITE); mobidb-lite (MOBIDB_LITE); mobidb-lite (MOBIDB_LITE); PTHR22722 (PANTHER); PTHR22722:SF4 (PANTHER); CYTOPLASMIC_DOMAIN (PHOBIUS); NON_CYTOP…	PREDICTED: uncharacterized protein LOC106078172	C:GO:0016020; C:GO:0016021	C:membrane; C:integral component of membrane
Cnem002794-RA	174	XP_005102575.2	48.6	170.2	A0A2C9KII1	46.2	166.8	no hit	no IPS match	no IPS match	no IPS match	nuclear pore membrane glycoprotein 210-like	C:GO:0016020; C:GO:0016021	C:membrane; C:integral component of membrane
Cnem002799-RA	383	XP_013094431.1	45.3	241.1	A0A2C9L0H1	45.3	241.1	no hit	no GO terms	no GO terms	IPR019197 (PFAM); PTHR12835 (PANTHER); IPR015834 (PTHR12835:PANTHER); IPR029062 (SUPERFAMILY)	biotin--protein ligase-like	no GO terms	no GO terms
Cnem002805-RA	508	XP_005110758.1	64.5	636.3	A0A2C9JIW3	64.3	619.0	K05906	P:GO:0030328; P:GO:0055114; F:GO:0001735; F:GO:0016670	P:prenylcysteine catabolic process; P:oxidation-reduction process; F:prenylcysteine oxidase activity; F:oxidoreductase activity, acting on a sulfur group of donors, oxygen as acceptor	IPR010795 (PFAM); PF13450 (PFAM); IPR036188 (G3DSA:3.50.50.GENE3D); IPR017046 (PANTHER); TRANSMEMBRANE (PHOBIUS); NON_CYTOPLASMIC_DOMAIN (PHOBIUS); CYTOPLASMIC_DOMAIN (PHOBIUS); IPR036188 (SUPERFAMILY); TMhelix (TMHMM)	prenylcysteine oxidase-like	no GO terms	no GO terms
Cnem002810-RA	412	XP_013069138.1	44.9	293.5	A0A2C9K938	44.9	293.5	no hit	no GO terms	no GO terms	IPR013087 (SMART); G3DSA:3.30.160.60 (GENE3D); G3DSA:3.30.160.60 (GENE3D); mobidb-lite (MOBIDB_LITE); mobidb-lite (MOBIDB_LITE); mobidb-lite (MOBIDB_LITE); mobidb-lite (MOBIDB_LITE); mobidb-lite (MOBIDB_LITE); PTHR24404 (PANTHER); PTHR24404:SF62 (PANTHER); IPR013087 (PROSITE_PATTERNS); IPR013087 (PROSITE_PATTERNS); IPR013087 (PROSITE_PROFILES); IPR013087 (PROSITE_PROFILES); IPR013087 (PROSITE_PRO…	zinc finger protein Pegasus-like	no GO terms	no GO terms
Cnem002811-RA	1693	XP_025085055.1	49.5	1293.1	A0A3S1B9P2	45.0	1062.4	no hit	no GO terms	no GO terms	IPR013087 (SMART); G3DSA:3.30.160.60 (GENE3D); mobidb-lite (MOBIDB_LITE); mobidb-lite (MOBIDB_LITE); mobidb-lite (MOBIDB_LITE); mobidb-lite (MOBIDB_LITE); PTHR31511:SF12 (PANTHER); PTHR31511 (PANTHER); IPR013087 (PROSITE_PATTERNS); IPR013087 (PROSITE_PATTERNS); IPR013087 (PROSITE_PROFILES); IPR013087 (PROSITE_PROFILES); IPR043502 (SUPERFAMILY); IPR036236 (SUPERFAMILY)	uncharacterized protein LOC112558684 isoform X2	no GO terms	no GO terms
Cnem002813-RA	797	XP_005106604.1	46.9	600.9	A0A2C9LG21	45.5	582.0	K20177	P:GO:0016192; F:GO:0003676; F:GO:0004523	P:vesicle-mediated transport; F:nucleic acid binding; F:RNA-DNA hybrid ribonuclease activity	IPR002156 (PFAM); IPR036397 (G3DSA:3.30.420.GENE3D); IPR019452 (PFAM); IPR032914 (PANTHER); PTHR12894:SF29 (PANTHER); NON_CYTOPLASMIC_DOMAIN (PHOBIUS); SIGNAL_PEPTIDE_C_REGION (PHOBIUS); SIGNAL_PEPTIDE_H_REGION (PHOBIUS); SIGNAL_PEPTIDE (PHOBIUS); SIGNAL_PEPTIDE_N_REGION (PHOBIUS); IPR002156 (PROSITE_PROFILES); cd09276 (CDD); IPR012337 (SUPERFAMILY)	transforming growth factor-beta receptor-associated protein 1-like	no GO terms	no GO terms
Cnem002815-RA	538	RUS88711.1	39.1	395.6	A0A433U4I6	39.1	395.6	no hit	F:GO:0003676; F:GO:0004523	F:nucleic acid binding; F:RNA-DNA hybrid ribonuclease activity	IPR036397 (G3DSA:3.30.420.GENE3D); IPR002156 (PFAM); PTHR33332:SF6 (PANTHER); PTHR33332 (PANTHER); IPR002156 (PROSITE_PROFILES); IPR012337 (SUPERFAMILY)	hypothetical protein EGW08_003526	P:GO:0090502; F:GO:0003676; F:GO:0004523	P:RNA phosphodiester bond hydrolysis, endonucleolytic; F:nucleic acid binding; F:RNA-DNA hybrid ribonuclease activity
Cnem002817-RA	489	RUS88711.1	47.2	426.4	A0A433U4I6	47.2	426.4	no hit	F:GO:0003676; F:GO:0004523	F:nucleic acid binding; F:RNA-DNA hybrid ribonuclease activity	IPR000477 (PFAM); IPR002156 (PFAM); IPR036397 (G3DSA:3.30.420.GENE3D); IPR002156 (PROSITE_PROFILES); IPR012337 (SUPERFAMILY)	hypothetical protein EGW08_003526	P:GO:0090502; F:GO:0003676; F:GO:0004523	P:RNA phosphodiester bond hydrolysis, endonucleolytic; F:nucleic acid binding; F:RNA-DNA hybrid ribonuclease activity
Cnem002819-RA	254	XP_013085123.1	84.2	284.6	A0A2C9M8F0	84.2	284.6	K11315	no GO terms	no GO terms	Coil (COILS); IPR019340 (PFAM); IPR019340 (PANTHER)	transcriptional adapter 3-A-like	no GO terms	no GO terms
Cnem002821-RA	293	XP_013085124.1	57.9	312.4	A0A2C9KFC0	57.9	312.4	no hit	F:GO:0005515	F:protein binding	G3DSA:1.20.1280.50 (GENE3D); mobidb-lite (MOBIDB_LITE); IPR026509 (PANTHER); IPR036047 (SUPERFAMILY)	transmembrane protein 183-like	no GO terms	no GO terms
Cnem002827-RA	121	XP_013085126.1	76.9	163.7	A0A2C9K8J8	76.3	163.3	no hit	C:GO:0045202	C:synapse	mobidb-lite (MOBIDB_LITE); mobidb-lite (MOBIDB_LITE); mobidb-lite (MOBIDB_LITE); IPR030441 (PTHR12587:PANTHER); IPR029515 (PANTHER)	liprin-alpha-1-like isoform X4	P:GO:0050808; C:GO:0045202	P:synapse organization; C:synapse
Cnem002830-RA	228	XP_013085128.1	92.7	413.7	A0A2C9K8J8	92.7	413.7	no hit	F:GO:0005515; C:GO:0048786	F:protein binding; C:presynaptic active zone	Coil (COILS); IPR001660 (SMART); IPR013761 (G3DSA:1.10.150.GENE3D); IPR013761 (G3DSA:1.10.150.GENE3D); IPR001660 (PFAM); IPR001660 (PFAM); IPR013761 (G3DSA:1.10.150.GENE3D); IPR030439 (PTHR12587:PANTHER); IPR030439 (PTHR12587:PANTHER); IPR029515 (PANTHER); IPR029515 (PANTHER); IPR001660 (PROSITE_PROFILES); IPR001660 (PROSITE_PROFILES); IPR037621 (CDD); IPR013761 (SUPERFAMILY); IPR013761 (SUPERFAM…	liprin-alpha-1-like isoform X4	P:GO:0050808; C:GO:0045202	P:synapse organization; C:synapse
Cnem002832-RA	577	XP_013085130.1	62.6	439.5	A0A2C9LZJ9	62.6	439.5	no hit	no GO terms	no GO terms	Coil (COILS); mobidb-lite (MOBIDB_LITE); mobidb-lite (MOBIDB_LITE); mobidb-lite (MOBIDB_LITE); mobidb-lite (MOBIDB_LITE); PTHR14689:SF0 (PANTHER); PTHR14689 (PANTHER)	ABC transporter F family member 4-like	no GO terms	no GO terms
Cnem002844-RA	233	KXJ10292.1	44.6	84.0	A0A2J7QV96	41.7	63.9	no hit	no GO terms	no GO terms	mobidb-lite (MOBIDB_LITE); mobidb-lite (MOBIDB_LITE); PTHR47027:SF6 (PANTHER); PTHR47027 (PANTHER); IPR016024 (SUPERFAMILY)	---NA---	no GO terms	no GO terms
Cnem002857-RA	219	RUS77412.1	33.9	85.1	A0A3S0ZL52	33.9	85.1	no hit	no GO terms	no GO terms	IPR004133 (PFAM); IPR029034 (G3DSA:2.10.90.GENE3D); IPR006207 (PROSITE_PROFILES)	hypothetical protein EGW08_014831	no GO terms	no GO terms
Cnem002859-RA	365	CAB3264536.1	38.3	223.4	A0A3P8TFH9	38.4	252.3	no hit	no GO terms	no GO terms	IPR000477 (PFAM); PTHR19446:SF427 (PANTHER); PTHR19446 (PANTHER); IPR000477 (PROSITE_PROFILES); cd01650 (CDD); IPR043502 (SUPERFAMILY)	PREDICTED: uncharacterized protein LOC106816918	no GO terms	no GO terms
Cnem002860-RA	464	XP_005113519.1	39.8	323.9	A0A3S0ZPX3	45.5	298.9	no hit	no GO terms	no GO terms	IPR029526 (PFAM); mobidb-lite (MOBIDB_LITE); mobidb-lite (MOBIDB_LITE); PTHR46599 (PANTHER)	piggyBac transposable element-derived protein 4-like	no GO terms	no GO terms
Cnem002862-RA	185	RUS77412.1	33.5	92.8	A0A3S0ZL52	33.5	92.8	no hit	no GO terms	no GO terms	IPR029034 (G3DSA:2.10.90.GENE3D)	hypothetical protein EGW08_014831	no GO terms	no GO terms
Cnem002864-RA	187	RUS77412.1	36.4	92.0	A0A3S0ZL52	36.4	92.0	no hit	no GO terms	no GO terms	IPR004133 (PFAM); IPR029034 (G3DSA:2.10.90.GENE3D)	hypothetical protein EGW08_014831	no GO terms	no GO terms
Cnem002865-RA	147	RUS69299.1	40.9	112.8	A0A3S0Z8K6	40.9	112.8	no hit	no IPS match	no IPS match	no IPS match	hypothetical protein EGW08_022941	no GO terms	no GO terms
Cnem002867-RA	262	RUS82531.1	58.1	255.0	A0A433TLY4	58.1	255.0	K07950	F:GO:0005525	F:GTP binding	IPR006689 (PRINTS); IPR006689 (PFAM); G3DSA:3.40.50.300 (GENE3D); IPR005225 (TIGRFAM); G3DSA:3.40.50.300 (GENE3D); PTHR11711 (PANTHER); PTHR11711:SF146 (PANTHER); PTHR11711 (PANTHER); PTHR11711:SF146 (PANTHER); PS51417 (PROSITE_PROFILES); IPR027417 (SUPERFAMILY)	hypothetical protein EGW08_009703	F:GO:0005525	F:GTP binding
Cnem002870-RA	294	RUS90913.1	77.7	445.3	A0A433UAU4	77.7	445.3	K01069	P:GO:0019243; F:GO:0004416	P:methylglyoxal catabolic process to D-lactate via S-lactoyl-glutathione; F:hydroxyacylglutathione hydrolase activity	IPR036866 (G3DSA:3.60.15.GENE3D); IPR017782 (TIGRFAM); IPR032282 (PFAM); IPR017782 (PIRSF); IPR001279 (PFAM); PTHR11935:SF80 (PANTHER); PTHR11935 (PANTHER); IPR017782 (HAMAP); IPR035680 (CDD); IPR036866 (SUPERFAMILY)	hydroxyacylglutathione hydrolase, mitochondrial-like	no GO terms	no GO terms
Cnem002871-RA	743	RUS90912.1	77.5	1095.9	A0A433UAW2	77.5	1095.9	K08734	P:GO:0006298; F:GO:0005524; F:GO:0016887; F:GO:0030983; C:GO:0032300	P:mismatch repair; F:ATP binding; F:ATPase activity; F:mismatched DNA binding; C:mismatch repair complex	IPR036890 (G3DSA:3.30.565.GENE3D); IPR002099 (TIGRFAM); IPR014721 (G3DSA:3.30.230.GENE3D); IPR013507 (PFAM); IPR032189 (PFAM); PF13589 (PFAM); mobidb-lite (MOBIDB_LITE); mobidb-lite (MOBIDB_LITE); mobidb-lite (MOBIDB_LITE); mobidb-lite (MOBIDB_LITE); PTHR10073:SF12 (PANTHER); IPR038973 (PANTHER); cd16926 (CDD); cd03483 (CDD); IPR020568 (SUPERFAMILY); IPR036890 (SUPERFAMILY)	hypothetical protein EGW08_001309	P:GO:0006298; F:GO:0005524; F:GO:0016887; F:GO:0030983; C:GO:0032300	P:mismatch repair; F:ATP binding; F:ATPase activity; F:mismatched DNA binding; C:mismatch repair complex
Cnem002876-RA	783	XP_014371867.1	35.9	488.4	A0A2A4JBK9	32.5	467.6	no hit	no GO terms	no GO terms	IPR000477 (PFAM); IPR036691 (G3DSA:3.60.10.GENE3D); PTHR47027 (PANTHER); PTHR47027:SF6 (PANTHER); IPR000477 (PROSITE_PROFILES); cd01650 (CDD); cd09076 (CDD); IPR043502 (SUPERFAMILY); IPR036691 (SUPERFAMILY)	RNA-directed DNA polymerase from mobile element jockey-like	no GO terms	no GO terms
Cnem002877-RA	295	PNF29886.1	54.1	233.8	A0A2J7QMT0	54.1	233.8	no hit	no GO terms	no GO terms	G3DSA:3.30.420.470 (GENE3D); PTHR46060 (PANTHER)	hypothetical protein B7P43_G09445	no GO terms	no GO terms
Cnem002889-RA	558	KAF0297117.1	33.5	329.3	A0A164MS79	27.0	166.8	no hit	no GO terms	no GO terms	IPR000477 (PFAM); PTHR19446:SF427 (PANTHER); PTHR19446 (PANTHER); IPR000477 (PROSITE_PROFILES); cd01650 (CDD); IPR043502 (SUPERFAMILY)	putative RNA-directed DNA polymerase from transposon BS	P:GO:0006278; P:GO:0090502; F:GO:0003676; F:GO:0003964; F:GO:0004523	P:RNA-dependent DNA biosynthetic process; P:RNA phosphodiester bond hydrolysis, endonucleolytic; F:nucleic acid binding; F:RNA-directed DNA polymerase activity; F:RNA-DNA hybrid ribonuclease activity
Cnem002891-RA	143	XP_013079189.1;XP_013079191.1	64.6	201.4	A0A2C9KGK5	64.6	201.4	no hit	no GO terms	no GO terms	PTHR21579 (PANTHER); PTHR21579:SF13 (PANTHER)	PREDICTED: uncharacterized protein LOC106065014 isoform X2	C:GO:0016021	C:integral component of membrane
Cnem002894-RA	265	XP_014677047.1	46.7	189.9	A0A3P8TFH9	45.7	201.8	no hit	no GO terms	no GO terms	PTHR19446:SF427 (PANTHER); PTHR19446 (PANTHER)	PREDICTED: uncharacterized protein LOC106816918	no GO terms	no GO terms
Cnem002895-RA	133	no hit	no hit	no hit	no hit	no hit	no hit	no hit	no IPS match	no IPS match	no IPS match	---NA---	no GO terms	no GO terms
Cnem002896-RA	209	RUS80085.1	45.6	90.9	A0A3S1BBB4	45.6	90.9	no hit	F:GO:0003676; F:GO:0004523	F:nucleic acid binding; F:RNA-DNA hybrid ribonuclease activity	IPR036397 (G3DSA:3.30.420.GENE3D); IPR002156 (PROSITE_PROFILES); IPR012337 (SUPERFAMILY)	PREDICTED: uncharacterized protein LOC101854436	no GO terms	no GO terms
Cnem002897-RA	192	XP_012942417.1	38.3	144.1	C3ZYD8	40.0	121.7	no hit	no GO terms	no GO terms	IPR036691 (G3DSA:3.60.10.GENE3D); IPR027124 (PANTHER); PTHR23227:SF49 (PANTHER); IPR036691 (SUPERFAMILY)	craniofacial development protein 2-like	no GO terms	no GO terms
Cnem002899-RA	694	XP_013079189.1;XP_013079191.1	49.2	513.1	A0A2C9KGK5	49.2	513.1	no hit	no GO terms	no GO terms	mobidb-lite (MOBIDB_LITE); mobidb-lite (MOBIDB_LITE); mobidb-lite (MOBIDB_LITE); mobidb-lite (MOBIDB_LITE); mobidb-lite (MOBIDB_LITE); mobidb-lite (MOBIDB_LITE); mobidb-lite (MOBIDB_LITE); PTHR21579 (PANTHER); PTHR21579:SF13 (PANTHER)	PREDICTED: uncharacterized protein LOC106065014 isoform X1	C:GO:0016020; C:GO:0016021	C:membrane; C:integral component of membrane
Cnem002900-RA	302	RUS90919.1	41.1	255.0	A0A3S1A548	41.1	255.0	no hit	no IPS match	no IPS match	no IPS match	hypothetical protein EGW08_001316	no GO terms	no GO terms
Cnem002901-RA	401	PVD21563.1	37.7	261.9	A0A2T7NK70	37.7	261.9	no hit	no GO terms	no GO terms	IPR000477 (PFAM); PTHR19446 (PANTHER); PTHR19446:SF425 (PANTHER); IPR000477 (PROSITE_PROFILES); IPR043502 (SUPERFAMILY)	hypothetical protein C0Q70_17361	no GO terms	no GO terms
Cnem002902-RA	295	RUS88711.1	47.4	136.0	A0A3S1BBB4	47.4	136.0	no hit	F:GO:0003676; F:GO:0004523	F:nucleic acid binding; F:RNA-DNA hybrid ribonuclease activity	IPR002156 (PFAM); IPR036397 (G3DSA:3.30.420.GENE3D); IPR002156 (PROSITE_PROFILES); IPR012337 (SUPERFAMILY)	hypothetical protein EGW08_012163	P:GO:0090502; F:GO:0003676; F:GO:0004523	P:RNA phosphodiester bond hydrolysis, endonucleolytic; F:nucleic acid binding; F:RNA-DNA hybrid ribonuclease activity
Cnem002904-RA	249	XP_012939497.1	78.6	405.2	A0A433SUW9	76.6	398.3	no hit	P:GO:0016573; C:GO:0000123; C:GO:0005634	P:histone acetylation; C:histone acetyltransferase complex; C:nucleus	IPR033317 (PTHR11139:PANTHER); PTHR11139 (PANTHER)	transformation/transcription domain-associated protein-like isoform X10	no GO terms	no GO terms
Cnem002905-RA	161	RUS73094.1	83.1	274.2	A0A433SUW9	83.1	274.2	no hit	P:GO:0016573; C:GO:0000123; C:GO:0005634	P:histone acetylation; C:histone acetyltransferase complex; C:nucleus	IPR033317 (PTHR11139:PANTHER); PTHR11139 (PANTHER); IPR016024 (SUPERFAMILY)	hypothetical protein EGW08_019155, partial	P:GO:0016573; C:GO:0000123	P:histone acetylation; C:histone acetyltransferase complex
Cnem002906-RA	234	XP_013079193.1	83.3	409.5	A0A2C9K9Y3	83.3	409.5	no hit	P:GO:0016573; C:GO:0000123; C:GO:0005634	P:histone acetylation; C:histone acetyltransferase complex; C:nucleus	PTHR11139 (PANTHER); IPR033317 (PTHR11139:PANTHER)	transformation/transcription domain-associated protein-like	P:GO:0016310; P:GO:0016573; F:GO:0016301; C:GO:0000123	P:phosphorylation; P:histone acetylation; F:kinase activity; C:histone acetyltransferase complex
Cnem002907-RA	1302	XP_012939497.1	84.0	1645.6	A0A2C9K9Y3	84.5	1610.1	K08874	P:GO:0016573; C:GO:0000123; C:GO:0005634	P:histone acetylation; C:histone acetyltransferase complex; C:nucleus	mobidb-lite (MOBIDB_LITE); mobidb-lite (MOBIDB_LITE); mobidb-lite (MOBIDB_LITE); mobidb-lite (MOBIDB_LITE); PTHR11139 (PANTHER); IPR033317 (PTHR11139:PANTHER); IPR016024 (SUPERFAMILY)	transformation/transcription domain-associated protein-like isoform X9	no GO terms	no GO terms
Cnem002909-RA	1260	XP_012939503.1	85.6	1975.3	A0A2C9K9Y3	81.6	1971.4	K08874	P:GO:0016573; F:GO:0005515; C:GO:0000123; C:GO:0005634	P:histone acetylation; F:protein binding; C:histone acetyltransferase complex; C:nucleus	IPR003152 (PFAM); IPR000403 (PFAM); IPR003151 (PFAM); mobidb-lite (MOBIDB_LITE); mobidb-lite (MOBIDB_LITE); mobidb-lite (MOBIDB_LITE); mobidb-lite (MOBIDB_LITE); PTHR11139 (PANTHER); IPR033317 (PTHR11139:PANTHER); IPR000403 (PROSITE_PROFILES); IPR003152 (PROSITE_PROFILES); IPR014009 (PROSITE_PROFILES); cd05163 (CDD); IPR011009 (SUPERFAMILY)	transformation/transcription domain-associated protein-like isoform X10	no GO terms	no GO terms
Cnem002910-RA	253	XP_013079197.1	60.1	295.0	A0A2C9JRJ1	60.1	295.0	K09209	no GO terms	no GO terms	G3DSA:3.30.160.60 (GENE3D); IPR013087 (PFAM); G3DSA:3.30.160.60 (GENE3D); G3DSA:3.30.160.60 (GENE3D); PTHR23235 (PANTHER); PTHR23235:SF21 (PANTHER); IPR013087 (PROSITE_PROFILES); IPR013087 (PROSITE_PROFILES); IPR013087 (PROSITE_PROFILES); IPR036236 (SUPERFAMILY); IPR036236 (SUPERFAMILY)	Krueppel-like factor 9	no GO terms	no GO terms
Cnem002912-RA	623	XP_013076419.1	73.4	917.9	A0A2C9JPP0	73.4	917.9	K13278	P:GO:0006520; F:GO:0004067; F:GO:0005515	P:cellular amino acid metabolic process; F:asparaginase activity; F:protein binding	IPR006034 (PRINTS); IPR002110 (SMART); IPR006034 (SMART); IPR036770 (G3DSA:1.25.40.GENE3D); IPR037152 (G3DSA:3.40.50.GENE3D); IPR020683 (PFAM); IPR036770 (G3DSA:1.25.40.GENE3D); IPR027473 (G3DSA:3.40.50.GENE3D); IPR006034 (PIRSF); IPR006033 (TIGRFAM); IPR027474 (PFAM); IPR040919 (PFAM); PIRSF500176 (PIRSF),SFLDS00057 (SFLD); PTHR11707:SF28 (PANTHER); PTHR11707 (PANTHER); IPR027475 (PROSITE_PATTER…	PREDICTED: L-asparaginase-like	P:GO:0006520; F:GO:0004067	P:cellular amino acid metabolic process; F:asparaginase activity
Cnem002913-RA	873	XP_029652353.1	48.9	646.7	A0A0L8FYR2	46.6	630.9	no hit	no GO terms	no GO terms	IPR013087 (SMART); G3DSA:3.30.160.60 (GENE3D); G3DSA:3.30.160.60 (GENE3D); G3DSA:3.30.160.60 (GENE3D); IPR013087 (PFAM); G3DSA:3.30.160.60 (GENE3D); G3DSA:3.30.160.60 (GENE3D); G3DSA:3.30.160.60 (GENE3D); G3DSA:3.30.160.60 (GENE3D); mobidb-lite (MOBIDB_LITE); mobidb-lite (MOBIDB_LITE); mobidb-lite (MOBIDB_LITE); mobidb-lite (MOBIDB_LITE); mobidb-lite (MOBIDB_LITE); PTHR24381:SF283 (PANTHER); PTHR…	zinc finger protein 208-like	no GO terms	no GO terms
Cnem002915-RA	154	XP_014677047.1	45.5	142.9	W4XD74	38.3	107.8	no hit	no GO terms	no GO terms	IPR000477 (PFAM); PTHR19446 (PANTHER); PTHR19446:SF425 (PANTHER); IPR000477 (PROSITE_PROFILES); IPR043502 (SUPERFAMILY)	PREDICTED: uncharacterized protein LOC106816918	no GO terms	no GO terms
Cnem002916-RA	141	RUS77389.1	58.2	116.3	A0A433T747	58.2	116.3	K23166	no GO terms	no GO terms	Coil (COILS); IPR010754 (PFAM); IPR010754 (PANTHER); TRANSMEMBRANE (PHOBIUS); NON_CYTOPLASMIC_DOMAIN (PHOBIUS); CYTOPLASMIC_DOMAIN (PHOBIUS)	hypothetical protein EGW08_014835	no GO terms	no GO terms
Cnem002917-RA	103	no hit	no hit	no hit	no hit	no hit	no hit	no hit	no GO terms	no GO terms	Coil (COILS)	---NA---	no GO terms	no GO terms
Cnem002918-RA	607	XP_005110056.1	41.4	219.2	A0A3S1A8F2	37.8	186.4	no hit	no GO terms	no GO terms	mobidb-lite (MOBIDB_LITE); mobidb-lite (MOBIDB_LITE); mobidb-lite (MOBIDB_LITE); mobidb-lite (MOBIDB_LITE); mobidb-lite (MOBIDB_LITE); mobidb-lite (MOBIDB_LITE); IPR009003 (SUPERFAMILY)	PREDICTED: uncharacterized protein LOC101863302 isoform X4	no GO terms	no GO terms
Cnem002921-RA	624	XP_005100983.1	83.3	1139.0	A0A2C9JJC3	80.2	1080.1	K00710	no GO terms	no GO terms	IPR000772 (SMART); IPR029044 (G3DSA:3.90.550.GENE3D); IPR000772 (PFAM); IPR001173 (PFAM); G3DSA:2.80.10.50 (GENE3D); mobidb-lite (MOBIDB_LITE); mobidb-lite (MOBIDB_LITE); PTHR11675:SF68 (PANTHER); PTHR11675 (PANTHER); SIGNAL_PEPTIDE_C_REGION (PHOBIUS); SIGNAL_PEPTIDE_N_REGION (PHOBIUS); SIGNAL_PEPTIDE (PHOBIUS); NON_CYTOPLASMIC_DOMAIN (PHOBIUS); SIGNAL_PEPTIDE_H_REGION (PHOBIUS); IPR000772 (PROSI…	N-acetylgalactosaminyltransferase 7-like isoform X1	no GO terms	no GO terms
Cnem002922-RA	125	no hit	no hit	no hit	no hit	no hit	no hit	no hit	no IPS match	no IPS match	no IPS match	---NA---	no GO terms	no GO terms
Cnem002923-RA	202	RUS89376.1	42.4	77.0	A0A3S1CD12	42.4	77.0	no hit	no GO terms	no GO terms	mobidb-lite (MOBIDB_LITE); mobidb-lite (MOBIDB_LITE); PTHR47027 (PANTHER); PTHR47027:SF6 (PANTHER); TRANSMEMBRANE (PHOBIUS); CYTOPLASMIC_DOMAIN (PHOBIUS); NON_CYTOPLASMIC_DOMAIN (PHOBIUS)	hypothetical protein EGW08_002896	F:GO:0005524; C:GO:0016021	F:ATP binding; C:integral component of membrane
Cnem002924-RA	229	no hit	no hit	no hit	no hit	no hit	no hit	no hit	no GO terms	no GO terms	mobidb-lite (MOBIDB_LITE); mobidb-lite (MOBIDB_LITE); mobidb-lite (MOBIDB_LITE); mobidb-lite (MOBIDB_LITE); mobidb-lite (MOBIDB_LITE)	spermatogenesis-defective protein 39 homolog	no GO terms	no GO terms
Cnem002925-RA	157	XP_005100985.1	76.8	198.7	A0A433TTC9	72.8	186.0	K23287	no GO terms	no GO terms	Coil (COILS); IPR038132 (G3DSA:1.10.150.GENE3D); IPR040057 (PANTHER)	spermatogenesis-defective protein 39 homolog isoform X3	no GO terms	no GO terms
Cnem002928-RA	622	XP_013069353.1;XP_013069354.1	45.4	487.6	A0A2C9KHZ2	45.4	487.6	no hit	F:GO:0003676; F:GO:0004523	F:nucleic acid binding; F:RNA-DNA hybrid ribonuclease activity	IPR029044 (G3DSA:3.90.550.GENE3D); IPR002156 (PFAM); IPR001173 (PFAM); IPR029044 (G3DSA:3.90.550.GENE3D); PTHR11675 (PANTHER); TRANSMEMBRANE (PHOBIUS); CYTOPLASMIC_DOMAIN (PHOBIUS); TRANSMEMBRANE (PHOBIUS); NON_CYTOPLASMIC_DOMAIN (PHOBIUS); NON_CYTOPLASMIC_DOMAIN (PHOBIUS); IPR002156 (PROSITE_PROFILES); cd09276 (CDD); IPR012337 (SUPERFAMILY); IPR029044 (SUPERFAMILY); IPR029044 (SUPERFAMILY)	inactive polypeptide N-acetylgalactosaminyltransferase-like protein 5	P:GO:0006486; F:GO:0016757; C:GO:0005794; C:GO:0016021	P:protein glycosylation; F:transferase activity, transferring glycosyl groups; C:Golgi apparatus; C:integral component of membrane
Cnem002936-RA	295	XP_013069352.1	52.2	197.2	A0A2C9L0A5	52.2	197.2	no hit	no GO terms	no GO terms	PF13489 (PFAM); G3DSA:3.40.50.150 (GENE3D); PTHR45128 (PANTHER); cd02440 (CDD); IPR029063 (SUPERFAMILY)	PREDICTED: LOW QUALITY PROTEIN: uncharacterized protein LOC106056946	no GO terms	no GO terms
Cnem002942-RA	216	XP_013069352.1	52.0	209.5	A0A2C9L0A5	52.0	209.5	no hit	no GO terms	no GO terms	PF13489 (PFAM); G3DSA:3.40.50.150 (GENE3D); PTHR45128 (PANTHER); cd02440 (CDD); IPR029063 (SUPERFAMILY)	PREDICTED: LOW QUALITY PROTEIN: uncharacterized protein LOC106056946	no GO terms	no GO terms
Cnem002943-RA	221	no hit	no hit	no hit	no hit	no hit	no hit	no hit	no GO terms	no GO terms	Coil (COILS); TRANSMEMBRANE (PHOBIUS); NON_CYTOPLASMIC_DOMAIN (PHOBIUS); CYTOPLASMIC_DOMAIN (PHOBIUS); IPR036691 (SUPERFAMILY)	hypothetical protein EGW08_012163	P:GO:0090502; F:GO:0003676; F:GO:0004523	P:RNA phosphodiester bond hydrolysis, endonucleolytic; F:nucleic acid binding; F:RNA-DNA hybrid ribonuclease activity
Cnem002947-RA	315	XP_013061422.1	77.4	168.7	A0A433U2L1	73.0	160.6	no hit	no GO terms	no GO terms	Coil (COILS); IPR013594 (PFAM); mobidb-lite (MOBIDB_LITE); mobidb-lite (MOBIDB_LITE); PTHR31184 (PANTHER); IPR038922 (CDD)	huntingtin-interacting protein K-like isoform X2	no GO terms	no GO terms
Cnem002949-RA	1049	WP_078461487.1;OOY49051.1	49.0	870.5	A0A3S1BCT8	41.1	832.4	no hit	F:GO:0003676; F:GO:0004523	F:nucleic acid binding; F:RNA-DNA hybrid ribonuclease activity	IPR036397 (G3DSA:3.30.420.GENE3D); IPR036691 (G3DSA:3.60.10.GENE3D); IPR000477 (PFAM); IPR002156 (PFAM); IPR005135 (PFAM); PTHR19446 (PANTHER); PTHR19446:SF427 (PANTHER); IPR000477 (PROSITE_PROFILES); IPR002156 (PROSITE_PROFILES); cd09276 (CDD); cd01650 (CDD); IPR043502 (SUPERFAMILY); IPR036691 (SUPERFAMILY); IPR012337 (SUPERFAMILY)	hypothetical protein	no GO terms	no GO terms
Cnem002954-RA	240	XP_013069352.1	57.4	201.8	A0A2C9L0A5	57.4	201.8	no hit	no GO terms	no GO terms	IPR041698 (PFAM); G3DSA:3.40.50.150 (GENE3D); PTHR45128 (PANTHER); cd02440 (CDD); IPR029063 (SUPERFAMILY)	PREDICTED: LOW QUALITY PROTEIN: uncharacterized protein LOC106056946	no GO terms	no GO terms
Cnem002956-RA	171	no hit	no hit	no hit	no hit	no hit	no hit	no hit	no GO terms	no GO terms	mobidb-lite (MOBIDB_LITE); mobidb-lite (MOBIDB_LITE); mobidb-lite (MOBIDB_LITE); mobidb-lite (MOBIDB_LITE)	---NA---	no GO terms	no GO terms
Cnem002957-RA	458	RUS88711.1	43.7	229.6	A0A433U4I6	43.7	229.6	K20181	F:GO:0003676; F:GO:0004523	F:nucleic acid binding; F:RNA-DNA hybrid ribonuclease activity	Coil (COILS); IPR036397 (G3DSA:3.30.420.GENE3D); mobidb-lite (MOBIDB_LITE); IPR038787 (PANTHER); IPR002156 (PROSITE_PROFILES); IPR012337 (SUPERFAMILY)	hypothetical protein EGW08_008040	P:GO:0090502; F:GO:0003676; F:GO:0004523	P:RNA phosphodiester bond hydrolysis, endonucleolytic; F:nucleic acid binding; F:RNA-DNA hybrid ribonuclease activity
Cnem002960-RA	175	XP_013069352.1	52.8	196.8	A0A2C9L0A5	52.8	196.8	no hit	no GO terms	no GO terms	IPR013217 (PFAM); G3DSA:3.40.50.150 (GENE3D); PTHR45128 (PANTHER); cd02440 (CDD); IPR029063 (SUPERFAMILY)	PREDICTED: LOW QUALITY PROTEIN: uncharacterized protein LOC106056946	no GO terms	no GO terms
Cnem002963-RA	499	XP_013095976.1	48.9	180.3	A0A2C9KP65	48.9	180.3	no hit	no GO terms	no GO terms	IPR013217 (PFAM); G3DSA:3.40.50.150 (GENE3D); PTHR45128 (PANTHER); CYTOPLASMIC_DOMAIN (PHOBIUS); CYTOPLASMIC_DOMAIN (PHOBIUS); TRANSMEMBRANE (PHOBIUS); TRANSMEMBRANE (PHOBIUS); TRANSMEMBRANE (PHOBIUS); NON_CYTOPLASMIC_DOMAIN (PHOBIUS); TRANSMEMBRANE (PHOBIUS); CYTOPLASMIC_DOMAIN (PHOBIUS); TRANSMEMBRANE (PHOBIUS); NON_CYTOPLASMIC_DOMAIN (PHOBIUS); NON_CYTOPLASMIC_DOMAIN (PHOBIUS); cd02440 (CDD); …	PREDICTED: uncharacterized protein LOC106079363 isoform X1	no GO terms	no GO terms
Cnem002964-RA	183	no hit	no hit	no hit	no hit	no hit	no hit	no hit	no GO terms	no GO terms	mobidb-lite (MOBIDB_LITE); mobidb-lite (MOBIDB_LITE); mobidb-lite (MOBIDB_LITE)	---NA---	no GO terms	no GO terms
Cnem002976-RA	23	no hit	no hit	no hit	no hit	no hit	no hit	no hit	no IPS match	no IPS match	no IPS match	---NA---	no GO terms	no GO terms
Cnem002977-RA	416	PVD27370.1	42.2	229.6	A0A2T7P1U5	42.2	229.6	no hit	no GO terms	no GO terms	IPR000477 (PFAM); PTHR47027 (PANTHER); PTHR47027:SF5 (PANTHER); IPR013087 (PROSITE_PATTERNS); IPR000477 (PROSITE_PROFILES); IPR013087 (PROSITE_PROFILES); IPR043502 (SUPERFAMILY)	hypothetical protein C0Q70_12527	no GO terms	no GO terms
Cnem002985-RA	136	XP_005105587.1	63.3	179.1	A0A2C9LA98	66.1	160.2	K02437	P:GO:0019464; C:GO:0005960	P:glycine decarboxylation via glycine cleavage system; C:glycine cleavage complex	IPR033753 (PFAM); G3DSA:2.40.50.100 (GENE3D); IPR002930 (PANTHER); PTHR11715:SF3 (PANTHER); IPR033753 (CDD); IPR011053 (SUPERFAMILY)	glycine cleavage system H protein, mitochondrial	no GO terms	no GO terms
Cnem002987-RA	526	PVD21563.1	30.3	90.1	A0A2T7NK70	30.3	90.1	no hit	no GO terms	no GO terms	Coil (COILS); G3DSA:3.40.50.12700 (GENE3D); cd00229 (CDD); SSF52266 (SUPERFAMILY)	hypothetical protein C0Q70_17361	no GO terms	no GO terms
Cnem003002-RA	147	no hit	no hit	no hit	no hit	no hit	no hit	no hit	no IPS match	no IPS match	no IPS match	hypothetical protein EGW08_021432	no GO terms	no GO terms
Cnem003003-RA	434	WP_147393938.1;RJG15198.1	45.2	278.5	A0A2B4REM3	43.5	275.8	no hit	no GO terms	no GO terms	IPR000477 (PFAM); PTHR47027:SF6 (PANTHER); PTHR47027 (PANTHER); PTHR47027:SF6 (PANTHER); PTHR47027 (PANTHER); IPR000477 (PROSITE_PROFILES); IPR043502 (SUPERFAMILY)	hypothetical protein, partial	no GO terms	no GO terms
Cnem003006-RA	282	PVD21563.1	53.3	73.6	A0A2T7NK70	53.3	73.6	no hit	no GO terms	no GO terms	IPR036514 (G3DSA:3.40.50.GENE3D); SSF52266 (SUPERFAMILY)	hypothetical protein C0Q70_17361	no GO terms	no GO terms
Cnem003011-RA	3125	no hit	no hit	no hit	no hit	no hit	no hit	no hit	no GO terms	no GO terms	PTHR45795 (PANTHER)	---NA---	no GO terms	no GO terms
Cnem003012-RA	1031	PVD21563.1	41.3	360.5	A0A2T7NK70	41.3	360.5	no hit	no GO terms	no GO terms	IPR000477 (PFAM); IPR036514 (G3DSA:3.40.50.GENE3D); mobidb-lite (MOBIDB_LITE); mobidb-lite (MOBIDB_LITE); mobidb-lite (MOBIDB_LITE); mobidb-lite (MOBIDB_LITE); PTHR19446 (PANTHER); PTHR19446:SF425 (PANTHER); IPR000477 (PROSITE_PROFILES); cd01650 (CDD); SSF52266 (SUPERFAMILY); IPR043502 (SUPERFAMILY)	hypothetical protein C0Q70_17361	no GO terms	no GO terms
Cnem003015-RA	109	XP_005110853.2	68.4	142.9	A0A2C9L0K0	60.4	135.6	no hit	F:GO:0005515	F:protein binding	IPR013783 (G3DSA:2.60.40.GENE3D); IPR003961 (PFAM); PTHR44170:SF9 (PANTHER); PTHR44170 (PANTHER); IPR003961 (PROSITE_PROFILES); IPR003961 (CDD); IPR036116 (SUPERFAMILY)	roundabout homolog 2-like	no GO terms	no GO terms
Cnem003016-RA	160	XP_013077375.1	68.6	187.6	A0A2C9LIU7	68.6	187.6	no hit	no GO terms	no GO terms	mobidb-lite (MOBIDB_LITE)	PREDICTED: uncharacterized protein LOC106063526 isoform X3	no GO terms	no GO terms
Cnem003017-RA	909	RUS68506.1	44.6	758.8	A0A3S0Z3I7	44.6	758.8	no hit	no GO terms	no GO terms	IPR000477 (PFAM); IPR005135 (PFAM); IPR036691 (G3DSA:3.60.10.GENE3D); PTHR47027 (PANTHER); PTHR47027:SF5 (PANTHER); IPR000477 (PROSITE_PROFILES); cd01650 (CDD); cd09076 (CDD); IPR043502 (SUPERFAMILY); IPR036691 (SUPERFAMILY)	hypothetical protein EGW08_023732	no GO terms	no GO terms
Cnem003018-RA	69	no hit	no hit	no hit	no hit	no hit	no hit	no hit	no GO terms	no GO terms	mobidb-lite (MOBIDB_LITE); mobidb-lite (MOBIDB_LITE); mobidb-lite (MOBIDB_LITE); mobidb-lite (MOBIDB_LITE)	---NA---	no GO terms	no GO terms
Cnem003019-RA	1105	no hit	no hit	no hit	no hit	no hit	no hit	K06237	no GO terms	no GO terms	PTHR36911 (PANTHER)	S-layer family protein	no GO terms	no GO terms
Cnem003020-RA	548	XP_012937187.1	36.6	209.1	A0A433U4I6	45.3	180.6	no hit	no GO terms	no GO terms	IPR000477 (PFAM); PTHR19446 (PANTHER); PTHR19446:SF425 (PANTHER)	PREDICTED: uncharacterized protein LOC106013216	no GO terms	no GO terms
Cnem003023-RA	102	XP_005097772.1	63.9	147.5	A0A2C9JQ18	62.6	142.1	K02140	P:GO:0015986; F:GO:0015078; C:GO:0000276	P:ATP synthesis coupled proton transport; F:proton transmembrane transporter activity; C:mitochondrial proton-transporting ATP synthase complex, coupling factor F(o)	IPR006808 (PFAM); PTHR12386:SF26 (PANTHER); IPR006808 (PANTHER)	ATP synthase subunit g, mitochondrial-like	no GO terms	no GO terms
Cnem003024-RA	290	XP_013082336.1	80.8	441.4	A0A2C9JTI4	71.4	418.3	K09106	F:GO:0046983	F:protein dimerization activity	IPR011598 (PFAM); IPR036638 (G3DSA:4.10.280.GENE3D); mobidb-lite (MOBIDB_LITE); mobidb-lite (MOBIDB_LITE); mobidb-lite (MOBIDB_LITE); mobidb-lite (MOBIDB_LITE); PTHR46117 (PANTHER); PTHR46117:SF1 (PANTHER); IPR011598 (PROSITE_PROFILES); IPR011598 (CDD); IPR036638 (SUPERFAMILY)	upstream stimulatory factor 2-like isoform X7	F:GO:0046983	F:protein dimerization activity
Cnem003026-RA	1404	RUS88711.1	49.0	404.8	A0A433U4I6	49.0	404.8	no hit	F:GO:0003676; F:GO:0004523	F:nucleic acid binding; F:RNA-DNA hybrid ribonuclease activity	IPR036397 (G3DSA:3.30.420.GENE3D); IPR036397 (G3DSA:3.30.420.GENE3D); IPR002156 (PFAM); PTHR10642 (PANTHER); IPR002156 (PROSITE_PROFILES); IPR002156 (PROSITE_PROFILES); cd09276 (CDD); IPR012337 (SUPERFAMILY); IPR012337 (SUPERFAMILY)	uncharacterized protein LOC110448316	no GO terms	no GO terms
Cnem003027-RA	823	XP_013075669.1	54.0	683.7	A0A2C9JP82	54.0	683.7	no hit	no GO terms	no GO terms	IPR011993 (G3DSA:2.30.29.GENE3D); IPR004182 (PFAM); IPR031968 (PFAM); mobidb-lite (MOBIDB_LITE); mobidb-lite (MOBIDB_LITE); mobidb-lite (MOBIDB_LITE); PTHR23319 (PANTHER); IPR031968 (PROSITE_PROFILES)	GRAM domain-containing protein 1B-like isoform X2	C:GO:0016021	C:integral component of membrane
Cnem003028-RA	183	XP_013075668.1	50.6	149.1	A0A2C9JP82	51.4	147.1	no hit	no GO terms	no GO terms	mobidb-lite (MOBIDB_LITE); mobidb-lite (MOBIDB_LITE); mobidb-lite (MOBIDB_LITE); mobidb-lite (MOBIDB_LITE); mobidb-lite (MOBIDB_LITE); mobidb-lite (MOBIDB_LITE)	GRAM domain-containing protein 1B-like isoform X3	C:GO:0016020	C:membrane
Cnem003033-RA	140	XP_025100795.1	73.0	163.3	A0A2C9JP75	73.0	163.3	K14388	P:GO:0055085; F:GO:0022857; C:GO:0016020	P:transmembrane transport; F:transmembrane transporter activity; C:membrane	IPR001734 (PFAM); IPR038377 (G3DSA:1.20.1730.GENE3D); PTHR42985 (PANTHER); PTHR42985:SF6 (PANTHER); PS51257 (PROSITE_PROFILES); IPR001734 (PROSITE_PROFILES)	sodium-coupled monocarboxylate transporter 1-like	no GO terms	no GO terms
Cnem003038-RA	339	XP_013093779.1	68.7	490.7	A0A2C9K1E7	68.7	490.7	K17420	F:GO:0000166	F:nucleotide binding	IPR012675 (G3DSA:3.10.20.GENE3D); IPR004095 (PFAM); G3DSA:3.30.980.10 (GENE3D); PTHR42753 (PANTHER); PTHR42753:SF9 (PANTHER); cd01667 (CDD); IPR012676 (SUPERFAMILY); IPR018163 (SUPERFAMILY)	39S ribosomal protein L39, mitochondrial-like	F:GO:0000166	F:nucleotide binding
Cnem003046-RA	748	RUS88711.1	41.0	310.5	A0A433U4I6	41.0	310.5	no hit	F:GO:0003676; F:GO:0004523	F:nucleic acid binding; F:RNA-DNA hybrid ribonuclease activity	IPR002156 (PFAM); IPR000477 (PFAM); IPR036397 (G3DSA:3.30.420.GENE3D); PTHR33332 (PANTHER); IPR002156 (PROSITE_PROFILES); IPR000477 (PROSITE_PROFILES); cd01650 (CDD); IPR012337 (SUPERFAMILY)	hypothetical protein EGW08_003526	P:GO:0090502; F:GO:0003676; F:GO:0004523	P:RNA phosphodiester bond hydrolysis, endonucleolytic; F:nucleic acid binding; F:RNA-DNA hybrid ribonuclease activity
Cnem003048-RA	134	no hit	no hit	no hit	no hit	no hit	no hit	no hit	F:GO:0003697; C:GO:1990879	F:single-stranded DNA binding; C:CST complex	G3DSA:2.40.50.140 (GENE3D); IPR029146 (PFAM)	---NA---	no GO terms	no GO terms
Cnem003051-RA	1363	RUS88711.1	45.4	462.2	A0A433U4I6	45.4	462.2	no hit	F:GO:0003676; F:GO:0004523	F:nucleic acid binding; F:RNA-DNA hybrid ribonuclease activity	IPR036397 (G3DSA:3.30.420.GENE3D); IPR000477 (PFAM); mobidb-lite (MOBIDB_LITE); mobidb-lite (MOBIDB_LITE); PTHR45134 (PANTHER); PTHR45134 (PANTHER); PTHR45134 (PANTHER); PTHR45134 (PANTHER); PTHR45134:SF4 (PANTHER); PTHR45134:SF4 (PANTHER); PTHR45134:SF4 (PANTHER); PTHR45134:SF4 (PANTHER); IPR000477 (PROSITE_PROFILES); IPR002156 (PROSITE_PROFILES); cd09276 (CDD); cd01650 (CDD); IPR012337 (SUPERFA…	hypothetical protein EGW08_003526	P:GO:0090502; F:GO:0003676; F:GO:0004523	P:RNA phosphodiester bond hydrolysis, endonucleolytic; F:nucleic acid binding; F:RNA-DNA hybrid ribonuclease activity
Cnem003053-RA	211	XP_005103343.1;XP_005103344.1	58.2	233.0	A0A182YX79	54.2	212.6	K14165	P:GO:0006470; P:GO:0016311; F:GO:0004721; F:GO:0008138; F:GO:0016791	P:protein dephosphorylation; P:dephosphorylation; F:phosphoprotein phosphatase activity; F:protein tyrosine/serine/threonine phosphatase activity; F:phosphatase activity	IPR029021 (G3DSA:3.90.190.GENE3D); IPR000340 (PFAM); IPR042165 (PANTHER); IPR020422 (PROSITE_PROFILES); IPR000387 (PROSITE_PROFILES); cd14524 (CDD); IPR029021 (SUPERFAMILY)	phosphatidylglycerophosphatase and protein-tyrosine phosphatase 1-like	no GO terms	no GO terms
Cnem003056-RA	293	RUS77166.1	47.1	112.5	A0A433T6G4	47.1	112.5	no hit	no GO terms	no GO terms	mobidb-lite (MOBIDB_LITE)	hypothetical protein EGW08_015073	P:GO:0090502; F:GO:0003676; F:GO:0004523	P:RNA phosphodiester bond hydrolysis, endonucleolytic; F:nucleic acid binding; F:RNA-DNA hybrid ribonuclease activity
Cnem003057-RA	1303	WP_144078600.1	43.2	931.0	A0A3P8Q5A9	33.5	516.2	no hit	P:GO:0015074; F:GO:0003676	P:DNA integration; F:nucleic acid binding	IPR041373 (PFAM); IPR043128 (G3DSA:3.30.70.GENE3D); IPR041588 (PFAM); IPR001584 (PFAM); G3DSA:3.10.20.370 (GENE3D); G3DSA:3.10.10.10 (GENE3D); IPR043128 (G3DSA:3.30.70.GENE3D); IPR036397 (G3DSA:3.30.420.GENE3D); IPR000477 (PFAM); G3DSA:1.10.340.70 (GENE3D); mobidb-lite (MOBIDB_LITE); mobidb-lite (MOBIDB_LITE); mobidb-lite (MOBIDB_LITE); mobidb-lite (MOBIDB_LITE); PTHR24559 (PANTHER); PTHR24559:SF…	DDE-type integrase/transposase/recombinase	no GO terms	no GO terms
Cnem003059-RA	274	RUS74178.1	56.0	70.5	A0A3S1B211	56.0	70.5	no hit	no GO terms	no GO terms	mobidb-lite (MOBIDB_LITE); mobidb-lite (MOBIDB_LITE); mobidb-lite (MOBIDB_LITE)	POU domain, class 2, transcription factor 1-like	P:GO:0006355; P:GO:0006357; F:GO:0000981; F:GO:0003677; F:GO:0003700; C:GO:0005634	P:regulation of transcription, DNA-templated; P:regulation of transcription by RNA polymerase II; F:DNA-binding transcription factor activity, RNA polymerase II-specific; F:DNA binding; F:DNA-binding transcription factor activity; C:nucleus
Cnem003060-RA	260	XP_013093258.1	41.9	166.0	A0A2C9K172	41.1	161.0	no hit	P:GO:0016055	P:Wnt signaling pathway	IPR001158 (PFAM); IPR038207 (G3DSA:3.10.20.GENE3D); mobidb-lite (MOBIDB_LITE); mobidb-lite (MOBIDB_LITE); IPR015506 (PANTHER); PTHR10878:SF22 (PANTHER); IPR001158 (PROSITE_PROFILES); IPR029071 (SUPERFAMILY)	dixin-like isoform X3	P:GO:0016055	P:Wnt signaling pathway
Cnem003071-RA	2511	XP_013078717.1	36.6	84.7	A0A2C9JRA0	36.6	84.7	no hit	no GO terms	no GO terms	mobidb-lite (MOBIDB_LITE); mobidb-lite (MOBIDB_LITE); mobidb-lite (MOBIDB_LITE); mobidb-lite (MOBIDB_LITE); mobidb-lite (MOBIDB_LITE); PTHR18976:SF32 (PANTHER); PTHR18976 (PANTHER); PTHR18976 (PANTHER); PTHR18976:SF32 (PANTHER); PTHR18976:SF32 (PANTHER); PTHR18976 (PANTHER); PTHR18976:SF32 (PANTHER); PTHR18976 (PANTHER)	Putative cell agglutination protein	no GO terms	no GO terms
Cnem003072-RA	441	RUS89376.1	40.9	70.5	A0A3S1CD12	40.9	70.5	no hit	no GO terms	no GO terms	mobidb-lite (MOBIDB_LITE); mobidb-lite (MOBIDB_LITE); mobidb-lite (MOBIDB_LITE); mobidb-lite (MOBIDB_LITE); mobidb-lite (MOBIDB_LITE); PTHR47027:SF6 (PANTHER); PTHR47027 (PANTHER)	predicted protein	no GO terms	no GO terms
Cnem003074-RA	476	XP_013062130.1;XP_013062131.1;XP_013062133.1	44.7	176.4	A0A2C9LTC2	44.7	176.4	no hit	F:GO:0003676; F:GO:0004523	F:nucleic acid binding; F:RNA-DNA hybrid ribonuclease activity	Coil (COILS); IPR036397 (G3DSA:3.30.420.GENE3D); PTHR14582 (PANTHER); NON_CYTOPLASMIC_DOMAIN (PHOBIUS); TRANSMEMBRANE (PHOBIUS); CYTOPLASMIC_DOMAIN (PHOBIUS); IPR002156 (PROSITE_PROFILES); IPR012337 (SUPERFAMILY)	PREDICTED: uncharacterized protein LOC106051494	no GO terms	no GO terms
Cnem003078-RA	112	no hit	no hit	no hit	no hit	no hit	no hit	K22255	P:GO:0032780; F:GO:0042030; C:GO:0005739	P:negative regulation of ATPase activity; F:ATPase inhibitor activity; C:mitochondrion	Coil (COILS); G3DSA:1.20.5.500 (GENE3D); IPR007648 (PFAM); mobidb-lite (MOBIDB_LITE); mobidb-lite (MOBIDB_LITE); PTHR23407 (PANTHER); PTHR23407:SF6 (PANTHER); SignalP-TM (SIGNALP_GRAM_POSITIVE); SSF64602 (SUPERFAMILY)	ATPase inhibitor mai-1, mitochondrial-like	no GO terms	no GO terms
Cnem003082-RA	244	RUS88711.1	46.5	157.5	A0A3S1BBB4	46.5	157.5	no hit	no GO terms	no GO terms	SignalP-noTM (SIGNALP_EUK); IPR012337 (SUPERFAMILY)	hypothetical protein EGW08_013568	no GO terms	no GO terms
Cnem003084-RA	940	RUS88975.1	72.6	1196.4	A0A433U569	72.6	1196.4	K12855	P:GO:0000398; P:GO:0006396; F:GO:0005515	P:mRNA splicing, via spliceosome; P:RNA processing; F:protein binding	Coil (COILS); Coil (COILS); Coil (COILS); IPR003107 (SMART); IPR019734 (SMART); PF14559 (PFAM); IPR011990 (G3DSA:1.25.40.GENE3D); PF13432 (PFAM); IPR011990 (G3DSA:1.25.40.GENE3D); IPR027108 (PTHR11246:PANTHER); IPR027108 (PTHR11246:PANTHER); PTHR11246 (PANTHER); IPR013026 (PROSITE_PROFILES); IPR013026 (PROSITE_PROFILES); IPR013026 (PROSITE_PROFILES); IPR011990 (SUPERFAMILY); IPR011990 (SUPERFAMIL…	hypothetical protein EGW08_003222	P:GO:0000398	P:mRNA splicing, via spliceosome
Cnem003085-RA	230	no hit	no hit	no hit	no hit	no hit	no hit	no hit	no IPS match	no IPS match	no IPS match	hypothetical protein EGW08_021432	no GO terms	no GO terms
Cnem003097-RA	454	XP_014677047.1	30.5	241.9	A0A3S0ZVZ5	43.9	187.2	no hit	no GO terms	no GO terms	IPR000477 (PFAM); PTHR47027:SF6 (PANTHER); PTHR47027 (PANTHER); IPR043502 (SUPERFAMILY)	PREDICTED: uncharacterized protein LOC105383055	no GO terms	no GO terms
Cnem003101-RA	157	XP_013084082.1	33.9	72.8	A0A2C9JUR7	33.9	72.8	no hit	no IPS match	no IPS match	no IPS match	TPR and ankyrin repeat-containing protein 1-like	F:GO:0005524; F:GO:0046872	F:ATP binding; F:metal ion binding
Cnem003111-RA	293	XP_013084082.1	66.8	383.3	A0A2C9JUR7	66.8	383.3	no hit	no GO terms	no GO terms	PTHR21529:SF4 (PANTHER); IPR039904 (PANTHER); IPR027417 (SUPERFAMILY)	TPR and ankyrin repeat-containing protein 1-like	F:GO:0005524; F:GO:0046872	F:ATP binding; F:metal ion binding
Cnem003113-RA	331	RUS89376.1	48.1	134.8	A0A3S1CD12	48.1	134.8	no hit	no GO terms	no GO terms	Coil (COILS); IPR043128 (G3DSA:3.30.70.GENE3D); IPR000477 (PFAM); PTHR47027 (PANTHER); PTHR47027:SF6 (PANTHER); IPR000477 (PROSITE_PROFILES); IPR043502 (SUPERFAMILY)	hypothetical protein EGW08_002896	F:GO:0005524; C:GO:0016021	F:ATP binding; C:integral component of membrane
Cnem003116-RA	151	XP_013084082.1	51.8	112.5	A0A2C9JUR7	51.8	112.5	no hit	no GO terms	no GO terms	IPR036770 (G3DSA:1.25.40.GENE3D); mobidb-lite (MOBIDB_LITE); IPR036770 (SUPERFAMILY)	TPR and ankyrin repeat-containing protein 1-like	F:GO:0043167	F:ion binding
Cnem003117-RA	392	XP_014294910.1	24.8	63.2	no hit	no hit	no hit	no hit	F:GO:0003676; F:GO:0004523	F:nucleic acid binding; F:RNA-DNA hybrid ribonuclease activity	CYTOPLASMIC_DOMAIN (PHOBIUS); NON_CYTOPLASMIC_DOMAIN (PHOBIUS); TRANSMEMBRANE (PHOBIUS); IPR002156 (PROSITE_PROFILES); IPR012337 (SUPERFAMILY); TMhelix (TMHMM)	hypothetical protein EGW08_012163	P:GO:0090502; F:GO:0003676; F:GO:0004523	P:RNA phosphodiester bond hydrolysis, endonucleolytic; F:nucleic acid binding; F:RNA-DNA hybrid ribonuclease activity
Cnem003119-RA	593	GCF48642.1	37.0	152.9	F6R5D0	36.7	147.9	no hit	no GO terms	no GO terms	Coil (COILS); PTHR47027:SF6 (PANTHER); PTHR47027:SF6 (PANTHER); PTHR47027 (PANTHER); SIGNAL_PEPTIDE (PHOBIUS); SIGNAL_PEPTIDE_C_REGION (PHOBIUS); NON_CYTOPLASMIC_DOMAIN (PHOBIUS); SIGNAL_PEPTIDE_N_REGION (PHOBIUS); SIGNAL_PEPTIDE_H_REGION (PHOBIUS)	hypothetical protein parPi_0008428	no GO terms	no GO terms
Cnem003122-RA	434	GCF50924.1	37.5	308.9	A0A402F3F3	37.5	308.9	no hit	no GO terms	no GO terms	IPR000477 (PFAM); PTHR19446 (PANTHER); PTHR19446:SF427 (PANTHER); IPR000477 (PROSITE_PROFILES); cd01650 (CDD); IPR043502 (SUPERFAMILY)	reverse transcriptase family protein	no GO terms	no GO terms
Cnem003130-RA	308	no hit	no hit	no hit	no hit	no hit	no hit	no hit	no GO terms	no GO terms	NON_CYTOPLASMIC_DOMAIN (PHOBIUS); SIGNAL_PEPTIDE (PHOBIUS); TRANSMEMBRANE (PHOBIUS); CYTOPLASMIC_DOMAIN (PHOBIUS); NON_CYTOPLASMIC_DOMAIN (PHOBIUS); SIGNAL_PEPTIDE_C_REGION (PHOBIUS); SIGNAL_PEPTIDE_N_REGION (PHOBIUS); SIGNAL_PEPTIDE_H_REGION (PHOBIUS); TRANSMEMBRANE (PHOBIUS)	---NA---	no GO terms	no GO terms
Cnem003133-RA	254	XP_022296330.1	44.2	107.8	A0A433TAV6	47.7	90.1	no hit	F:GO:0003676; F:GO:0004523	F:nucleic acid binding; F:RNA-DNA hybrid ribonuclease activity	IPR002156 (PFAM); IPR000477 (PFAM); IPR036397 (G3DSA:3.30.420.GENE3D); PTHR19446 (PANTHER); PTHR19446:SF427 (PANTHER); IPR002156 (PROSITE_PROFILES); cd09276 (CDD); IPR012337 (SUPERFAMILY)	uncharacterized protein LOC111106094	no GO terms	no GO terms
Cnem003134-RA	306	XP_012943779.1	36.2	142.5	A0A433U4I6	41.1	119.8	no hit	no GO terms	no GO terms	IPR000477 (PFAM); mobidb-lite (MOBIDB_LITE); mobidb-lite (MOBIDB_LITE)	PREDICTED: uncharacterized protein LOC106013216	no GO terms	no GO terms
Cnem003136-RA	541	XP_012941316.1	36.2	108.6	A0A0G2KS01	25.9	114.8	no hit	F:GO:0003676	F:nucleic acid binding	IPR000477 (PFAM); IPR036397 (G3DSA:3.30.420.GENE3D); PTHR33332 (PANTHER); PTHR33332:SF6 (PANTHER); SIGNAL_PEPTIDE_N_REGION (PHOBIUS); SIGNAL_PEPTIDE_C_REGION (PHOBIUS); SIGNAL_PEPTIDE_H_REGION (PHOBIUS); SIGNAL_PEPTIDE (PHOBIUS); NON_CYTOPLASMIC_DOMAIN (PHOBIUS); IPR000477 (PROSITE_PROFILES); SignalP-noTM (SIGNALP_EUK); IPR043502 (SUPERFAMILY); IPR012337 (SUPERFAMILY)	hypothetical protein EGW08_003526	P:GO:0090502; F:GO:0003676; F:GO:0004523	P:RNA phosphodiester bond hydrolysis, endonucleolytic; F:nucleic acid binding; F:RNA-DNA hybrid ribonuclease activity
Cnem003137-RA	193	XP_012693647.2	34.8	121.3	A0A498LPG7	34.4	113.6	no hit	no IPS match	no IPS match	no IPS match	hypothetical protein EGW08_022941	no GO terms	no GO terms
Cnem003142-RA	453	XP_012938085.1	48.0	123.6	A0A2C9KCY1	44.4	118.2	K17095	F:GO:0003676; F:GO:0004523; F:GO:0005509; F:GO:0005544	F:nucleic acid binding; F:RNA-DNA hybrid ribonuclease activity; F:calcium ion binding; F:calcium-dependent phospholipid binding	Coil (COILS); IPR001464 (PRINTS); IPR018502 (SMART); IPR037104 (G3DSA:1.10.220.GENE3D); IPR018502 (PFAM); IPR037104 (G3DSA:1.10.220.GENE3D); PTHR10502:SF140 (PANTHER); PTHR10502 (PANTHER); IPR002156 (PROSITE_PROFILES); PS51897 (PROSITE_PROFILES); IPR037104 (SUPERFAMILY)	PREDICTED: uncharacterized protein LOC101846653	no GO terms	no GO terms
Cnem003143-RA	899	KAF0313595.1	30.2	355.9	A0A433U4I6	53.3	331.6	no hit	no GO terms	no GO terms	IPR005135 (PFAM); IPR036691 (G3DSA:3.60.10.GENE3D); IPR000477 (PFAM); mobidb-lite (MOBIDB_LITE); mobidb-lite (MOBIDB_LITE); mobidb-lite (MOBIDB_LITE); PTHR33332:SF19 (PANTHER); PTHR33332 (PANTHER); IPR000477 (PROSITE_PROFILES); IPR043502 (SUPERFAMILY); IPR036691 (SUPERFAMILY)	hypothetical protein EGW08_003526	P:GO:0090502; F:GO:0003676; F:GO:0004523	P:RNA phosphodiester bond hydrolysis, endonucleolytic; F:nucleic acid binding; F:RNA-DNA hybrid ribonuclease activity
Cnem003151-RA	465	XP_013084082.1	71.4	411.0	A0A2C9JUR7	71.4	411.0	no hit	no GO terms	no GO terms	Coil (COILS); G3DSA:3.40.50.300 (GENE3D); IPR039904 (PANTHER); PTHR21529:SF4 (PANTHER); cd17932 (CDD); IPR027417 (SUPERFAMILY)	TPR and ankyrin repeat-containing protein 1-like	F:GO:0005524; F:GO:0046872	F:ATP binding; F:metal ion binding
Cnem003153-RA	251	XP_013084082.1	50.2	181.8	A0A2C9JUR7	50.2	181.8	no hit	no GO terms	no GO terms	mobidb-lite (MOBIDB_LITE); PTHR21529:SF4 (PANTHER); IPR039904 (PANTHER)	TPR and ankyrin repeat-containing protein 1-like	F:GO:0005524; F:GO:0046872	F:ATP binding; F:metal ion binding
Cnem003154-RA	256	XP_013084082.1	48.0	170.6	A0A2C9JUR7	48.0	170.6	no hit	no IPS match	no IPS match	no IPS match	TPR and ankyrin repeat-containing protein 1-like	F:GO:0043167	F:ion binding
Cnem003155-RA	614	RUS88711.1	50.5	517.3	A0A433U4I6	50.5	517.3	no hit	F:GO:0003676; F:GO:0004523	F:nucleic acid binding; F:RNA-DNA hybrid ribonuclease activity	IPR002156 (PFAM); IPR000477 (PFAM); IPR036397 (G3DSA:3.30.420.GENE3D); PTHR33332 (PANTHER); PTHR33332:SF10 (PANTHER); IPR000477 (PROSITE_PROFILES); IPR002156 (PROSITE_PROFILES); IPR012337 (SUPERFAMILY); IPR043502 (SUPERFAMILY)	hypothetical protein EGW08_003526	P:GO:0090502; F:GO:0003676; F:GO:0004523	P:RNA phosphodiester bond hydrolysis, endonucleolytic; F:nucleic acid binding; F:RNA-DNA hybrid ribonuclease activity
Cnem003156-RA	238	XP_013084082.1	45.0	173.7	A0A2C9JUR7	45.0	173.7	no hit	no GO terms	no GO terms	IPR036770 (G3DSA:1.25.40.GENE3D); mobidb-lite (MOBIDB_LITE); IPR020683 (PROSITE_PROFILES); IPR036770 (SUPERFAMILY)	TPR and ankyrin repeat-containing protein 1-like	F:GO:0005524; F:GO:0046872	F:ATP binding; F:metal ion binding
Cnem003160-RA	1285	WP_144078600.1	42.8	925.2	A0A158P5N1	33.7	513.8	no hit	P:GO:0015074; F:GO:0003676	P:DNA integration; F:nucleic acid binding	Coil (COILS); Coil (COILS); IPR043128 (G3DSA:3.30.70.GENE3D); IPR041373 (PFAM); G3DSA:3.10.20.370 (GENE3D); IPR043128 (G3DSA:3.30.70.GENE3D); IPR001584 (PFAM); IPR000477 (PFAM); G3DSA:1.10.340.70 (GENE3D); IPR036397 (G3DSA:3.30.420.GENE3D); G3DSA:3.10.10.10 (GENE3D); IPR041588 (PFAM); mobidb-lite (MOBIDB_LITE); mobidb-lite (MOBIDB_LITE); mobidb-lite (MOBIDB_LITE); mobidb-lite (MOBIDB_LITE); PTHR2…	DDE-type integrase/transposase/recombinase	no GO terms	no GO terms
Cnem003162-RA	116	XP_013084082.1	41.0	75.9	A0A2C9JUR7	41.0	75.9	no hit	no IPS match	no IPS match	no IPS match	TPR and ankyrin repeat-containing protein 1-like	F:GO:0005524; F:GO:0046872	F:ATP binding; F:metal ion binding
Cnem003169-RA	309	GCF48586.1	41.2	235.7	A0A402EWI9	41.2	235.7	no hit	no GO terms	no GO terms	Coil (COILS); IPR000477 (PFAM); PTHR47027 (PANTHER); PTHR47027:SF6 (PANTHER); IPR000477 (PROSITE_PROFILES); IPR043502 (SUPERFAMILY)	hypothetical protein parPi_0014508	no GO terms	no GO terms
Cnem003170-RA	558	XP_032240337.1	43.4	260.0	K7EWA3	61.5	251.5	no hit	no GO terms	no GO terms	PTHR47027 (PANTHER); PTHR47027:SF6 (PANTHER); PTHR47027 (PANTHER); PTHR47027:SF6 (PANTHER)	uncharacterized protein LOC116619553, partial	no GO terms	no GO terms
Cnem003175-RA	185	no hit	no hit	no hit	no hit	no hit	no hit	no hit	no GO terms	no GO terms	CYTOPLASMIC_DOMAIN (PHOBIUS); CYTOPLASMIC_DOMAIN (PHOBIUS); TRANSMEMBRANE (PHOBIUS); TRANSMEMBRANE (PHOBIUS); NON_CYTOPLASMIC_DOMAIN (PHOBIUS)	hypothetical protein EGW08_021432	no GO terms	no GO terms
Cnem003179-RA	548	RUS73113.1	42.8	144.8	A0A433SV02	42.8	144.8	no hit	no GO terms	no GO terms	Coil (COILS)	hypothetical protein EGW08_019135	no GO terms	no GO terms
Cnem003187-RA	844	KAF0297117.1	28.6	313.5	A0A433TAX3	37.1	177.6	no hit	F:GO:0003676; F:GO:0004523	F:nucleic acid binding; F:RNA-DNA hybrid ribonuclease activity	IPR036397 (G3DSA:3.30.420.GENE3D); IPR000477 (PFAM); IPR002156 (PFAM); PTHR10642 (PANTHER); IPR000477 (PROSITE_PROFILES); IPR002156 (PROSITE_PROFILES); IPR002156 (PROSITE_PROFILES); IPR012337 (SUPERFAMILY); IPR012337 (SUPERFAMILY)	hypothetical protein EGW08_003526	P:GO:0090502; F:GO:0003676; F:GO:0004523	P:RNA phosphodiester bond hydrolysis, endonucleolytic; F:nucleic acid binding; F:RNA-DNA hybrid ribonuclease activity
Cnem003189-RA	587	WP_078461487.1;OOY49051.1	46.2	512.3	A0A433UD90	40.6	429.5	no hit	F:GO:0003676; F:GO:0004523	F:nucleic acid binding; F:RNA-DNA hybrid ribonuclease activity	IPR000477 (PFAM); IPR036397 (G3DSA:3.30.420.GENE3D); IPR002156 (PFAM); PTHR33332 (PANTHER); PTHR33332:SF6 (PANTHER); IPR000477 (PROSITE_PROFILES); IPR002156 (PROSITE_PROFILES); cd09276 (CDD); IPR012337 (SUPERFAMILY)	hypothetical protein	no GO terms	no GO terms
Cnem003192-RA	206	NP_001248345.1;ABW86950.1	90.1	145.2	A0A2C9K5S1	89.0	144.1	K11275	P:GO:0006334; F:GO:0003677; C:GO:0000786; C:GO:0042025	P:nucleosome assembly; F:DNA binding; C:nucleosome; C:host cell nucleus	IPR005819 (PRINTS); IPR005818 (SMART); IPR005818 (PFAM); IPR036388 (G3DSA:1.10.10.GENE3D); mobidb-lite (MOBIDB_LITE); mobidb-lite (MOBIDB_LITE); mobidb-lite (MOBIDB_LITE); mobidb-lite (MOBIDB_LITE); PTHR11467 (PANTHER); PTHR11467:SF112 (PANTHER); SIGNAL_PEPTIDE_N_REGION (PHOBIUS); NON_CYTOPLASMIC_DOMAIN (PHOBIUS); SIGNAL_PEPTIDE_H_REGION (PHOBIUS); SIGNAL_PEPTIDE (PHOBIUS); SIGNAL_PEPTIDE_C_REGIO…	histone 1o	P:GO:0006334; F:GO:0003677; C:GO:0000786; C:GO:0005634; C:GO:0042025	P:nucleosome assembly; F:DNA binding; C:nucleosome; C:nucleus; C:host cell nucleus
Cnem003193-RA	350	XP_028155648.1	45.8	146.7	A0A2P8YK05	44.5	139.0	no hit	no GO terms	no GO terms	mobidb-lite (MOBIDB_LITE); mobidb-lite (MOBIDB_LITE); PTHR47027:SF6 (PANTHER); PTHR47027 (PANTHER)	hypothetical protein EGW08_002896	F:GO:0005524; C:GO:0016021	F:ATP binding; C:integral component of membrane
Cnem003194-RA	677	XP_013079097.1	52.7	632.1	A0A2C9KB85	52.6	627.9	K02649	no GO terms	no GO terms	Coil (COILS); IPR000980 (PRINTS); IPR000980 (SMART); IPR036860 (G3DSA:3.30.505.GENE3D); IPR032498 (PFAM); IPR000980 (PFAM); IPR036860 (G3DSA:3.30.505.GENE3D); mobidb-lite (MOBIDB_LITE); mobidb-lite (MOBIDB_LITE); PTHR10155:SF10 (PANTHER); PTHR10155 (PANTHER); PTHR10155:SF10 (PANTHER); PTHR10155 (PANTHER); IPR000980 (PROSITE_PROFILES); IPR000980 (PROSITE_PROFILES); IPR036860 (SUPERFAMILY); IPR0368…	phosphatidylinositol 3-kinase regulatory subunit alpha-like isoform X2	P:GO:0035556; F:GO:0046872	P:intracellular signal transduction; F:metal ion binding
Cnem003199-RA	498	XP_012937187.1	30.6	108.2	no hit	no hit	no hit	no hit	F:GO:0003676; F:GO:0004523	F:nucleic acid binding; F:RNA-DNA hybrid ribonuclease activity	IPR002156 (PFAM); IPR000477 (PFAM); IPR036397 (G3DSA:3.30.420.GENE3D); IPR000477 (PROSITE_PROFILES); IPR002156 (PROSITE_PROFILES); IPR012337 (SUPERFAMILY)	hypothetical protein EGW08_003526	P:GO:0090502; F:GO:0003676; F:GO:0004523	P:RNA phosphodiester bond hydrolysis, endonucleolytic; F:nucleic acid binding; F:RNA-DNA hybrid ribonuclease activity
Cnem003212-RA	396	PNF30022.1	49.7	174.1	A0A2J7QN52	49.7	174.1	no hit	no GO terms	no GO terms	G3DSA:3.30.420.470 (GENE3D); PTHR46060 (PANTHER)	hypothetical protein B7P43_G05833	no GO terms	no GO terms
Cnem003217-RA	467	RUS85613.1	32.4	160.2	A0A3S0ZSA3	32.4	160.2	no hit	no GO terms	no GO terms	Coil (COILS); mobidb-lite (MOBIDB_LITE); mobidb-lite (MOBIDB_LITE); PTHR47027 (PANTHER); PTHR47027:SF6 (PANTHER)	hypothetical protein EGW08_006625	P:GO:0090307	P:mitotic spindle assembly
Cnem003219-RA	228	XP_013079109.1	41.7	147.9	A0A2C9LCX3	41.7	147.9	no hit	P:GO:0090307	P:mitotic spindle assembly	Coil (COILS); IPR031387 (PFAM); mobidb-lite (MOBIDB_LITE); mobidb-lite (MOBIDB_LITE); IPR031387 (PANTHER)	spindle and centriole-associated protein 1-like isoform X2	P:GO:0090307	P:mitotic spindle assembly
Cnem003224-RA	268	XP_005099295.1	89.7	498.0	A0A2C9M1A6	85.1	478.4	K14820	no GO terms	no GO terms	IPR007109 (SMART); IPR007109 (PFAM); PTHR13634:SF0 (PANTHER); IPR026532 (PANTHER); IPR007109 (PROSITE_PROFILES); SSF52954 (SUPERFAMILY)	ribosome biogenesis protein BRX1 homolog	no GO terms	no GO terms
Cnem003226-RA	285	XP_005103996.1	49.3	136.0	A0A433U1X1	36.6	106.3	no hit	F:GO:0003676; F:GO:0004523	F:nucleic acid binding; F:RNA-DNA hybrid ribonuclease activity	IPR000477 (PFAM); IPR036397 (G3DSA:3.30.420.GENE3D); TRANSMEMBRANE (PHOBIUS); CYTOPLASMIC_DOMAIN (PHOBIUS); NON_CYTOPLASMIC_DOMAIN (PHOBIUS); IPR002156 (PROSITE_PROFILES); IPR012337 (SUPERFAMILY)	RNA-directed DNA polymerase from mobile element jockey-like	no GO terms	no GO terms
Cnem003230-RA	112	no hit	no hit	no hit	no hit	no hit	no hit	no hit	no GO terms	no GO terms	mobidb-lite (MOBIDB_LITE)	---NA---	no GO terms	no GO terms
Cnem003231-RA	552	XP_012937712.1	70.4	635.2	A0A2C9JRG7	68.8	609.4	K14570	F:GO:0003676	F:nucleic acid binding	IPR013520 (SMART); IPR031736 (PFAM); IPR036397 (G3DSA:3.30.420.GENE3D); PTHR12801:SF46 (PANTHER); PTHR12801 (PANTHER); IPR034922 (CDD); IPR012337 (SUPERFAMILY)	RNA exonuclease 1 homolog	no GO terms	no GO terms
Cnem003233-RA	462	XP_013082975.1	38.7	324.3	A0A2C9KZ06	38.7	324.3	no hit	no IPS match	no IPS match	no IPS match	PREDICTED: uncharacterized protein LOC106068218	no GO terms	no GO terms
Cnem003235-RA	197	XP_012943779.1	59.3	139.0	J9KH31	38.1	74.7	no hit	no GO terms	no GO terms	mobidb-lite (MOBIDB_LITE); mobidb-lite (MOBIDB_LITE)	PREDICTED: uncharacterized protein LOC106013216	no GO terms	no GO terms
Cnem003236-RA	925	WP_078461487.1;OOY49051.1	46.5	813.5	A0A3S1BCT8	40.2	671.4	no hit	F:GO:0003676; F:GO:0004523	F:nucleic acid binding; F:RNA-DNA hybrid ribonuclease activity	Coil (COILS); IPR000477 (PFAM); IPR002156 (PFAM); IPR036397 (G3DSA:3.30.420.GENE3D); PTHR19446 (PANTHER); PTHR19446:SF427 (PANTHER); IPR000477 (PROSITE_PROFILES); IPR002156 (PROSITE_PROFILES); cd09276 (CDD); cd01650 (CDD); IPR043502 (SUPERFAMILY); IPR043502 (SUPERFAMILY); IPR012337 (SUPERFAMILY)	hypothetical protein	no GO terms	no GO terms
Cnem003241-RA	105	RUS85167.1	57.1	134.8	A0A433TUD0	57.1	134.8	K03671	P:GO:0006662; P:GO:0045454; F:GO:0015035	P:glycerol ether metabolic process; P:cell redox homeostasis; F:protein disulfide oxidoreductase activity	PR00421 (PRINTS); IPR013766 (PFAM); IPR005746 (PIRSF); IPR036249 (G3DSA:3.40.30.GENE3D); IPR005746 (TIGRFAM); PTHR46115:SF1 (PANTHER); PTHR46115 (PANTHER); IPR017937 (PROSITE_PATTERNS); IPR013766 (PROSITE_PROFILES); cd02947 (CDD); IPR036249 (SUPERFAMILY)	hypothetical protein EGW08_007071	P:GO:0006662; P:GO:0045454; P:GO:0055114; F:GO:0015035	P:glycerol ether metabolic process; P:cell redox homeostasis; P:oxidation-reduction process; F:protein disulfide oxidoreductase activity
Cnem003249-RA	704	RUS86294.1	48.6	422.9	A0A3S0ZUP8	48.6	422.9	no hit	no GO terms	no GO terms	IPR000477 (PFAM); mobidb-lite (MOBIDB_LITE); PTHR47027 (PANTHER); PTHR47027:SF5 (PANTHER); IPR000477 (PROSITE_PROFILES); cd01650 (CDD); IPR043502 (SUPERFAMILY)	unnamed protein product	no GO terms	no GO terms
Cnem003251-RA	272	GCF50011.1	38.7	76.3	A0A402F0P9	38.7	76.3	no hit	no GO terms	no GO terms	PTHR47027:SF6 (PANTHER); PTHR47027 (PANTHER); PTHR47027:SF6 (PANTHER)	hypothetical protein EGW08_015636	no GO terms	no GO terms
Cnem003254-RA	286	XP_013079175.1	51.4	226.1	A0A2C9LN94	51.4	226.1	no hit	no GO terms	no GO terms	mobidb-lite (MOBIDB_LITE); mobidb-lite (MOBIDB_LITE); TRANSMEMBRANE (PHOBIUS); CYTOPLASMIC_DOMAIN (PHOBIUS); NON_CYTOPLASMIC_DOMAIN (PHOBIUS); TMhelix (TMHMM)	contactin-associated protein-like 2	C:GO:0016020	C:membrane
Cnem003255-RA	254	XP_012938022.1	63.6	285.0	A0A433TUD4	53.8	229.9	no hit	no GO terms	no GO terms	IPR001791 (PFAM); G3DSA:2.10.25.10 (GENE3D); G3DSA:2.60.120.200 (GENE3D); IPR000742 (PROSITE_PROFILES); IPR001791 (PROSITE_PROFILES); cd00110 (CDD); IPR013320 (SUPERFAMILY)	contactin-associated protein-like 2	no GO terms	no GO terms
Cnem003262-RA	116	XP_012938022.1	73.3	122.1	A0A433TUD4	62.4	108.2	no hit	no GO terms	no GO terms	IPR014716 (G3DSA:3.90.215.GENE3D); PTHR15036:SF45 (PANTHER); PTHR15036 (PANTHER); IPR036056 (SUPERFAMILY)	contactin-associated protein-like 2	no GO terms	no GO terms
Cnem003264-RA	434	XP_012942356.1	38.1	256.9	C3ZYD8	36.1	181.4	no hit	no GO terms	no GO terms	Coil (COILS); IPR005135 (PFAM); IPR036691 (G3DSA:3.60.10.GENE3D); PTHR23227:SF68 (PANTHER); IPR027124 (PANTHER); cd09076 (CDD); IPR036691 (SUPERFAMILY)	craniofacial development protein 2-like	no GO terms	no GO terms
Cnem003266-RA	357	KAA3669964.1	40.9	235.0	A0A402EXG4	38.2	234.6	no hit	no GO terms	no GO terms	IPR000477 (PFAM); PTHR19446:SF427 (PANTHER); PTHR19446 (PANTHER); IPR000477 (PROSITE_PROFILES); cd01650 (CDD); IPR043502 (SUPERFAMILY)	hypothetical protein parPi_0009065	no GO terms	no GO terms
Cnem003267-RA	391	GCF48631.1	37.1	234.6	A0A402EWP9	37.1	234.6	no hit	no GO terms	no GO terms	IPR036691 (G3DSA:3.60.10.GENE3D); mobidb-lite (MOBIDB_LITE); mobidb-lite (MOBIDB_LITE); mobidb-lite (MOBIDB_LITE); mobidb-lite (MOBIDB_LITE); PTHR23227:SF62 (PANTHER); IPR027124 (PANTHER); cd09076 (CDD); IPR036691 (SUPERFAMILY)	hypothetical protein parPi_0014538	no GO terms	no GO terms
Cnem003270-RA	388	PVD34672.1	52.5	327.8	A0A2T7PMN6	52.5	327.8	no hit	no GO terms	no GO terms	IPR000477 (PFAM); PTHR19446:SF427 (PANTHER); PTHR19446 (PANTHER); IPR000477 (PROSITE_PROFILES); cd01650 (CDD); IPR043502 (SUPERFAMILY)	hypothetical protein C0Q70_05949	no GO terms	no GO terms
Cnem003274-RA	439	RUS78584.1	41.1	171.4	A0A433TAV6	41.1	171.4	no hit	F:GO:0003676; F:GO:0004523	F:nucleic acid binding; F:RNA-DNA hybrid ribonuclease activity	Coil (COILS); IPR002156 (PFAM); IPR036397 (G3DSA:3.30.420.GENE3D); mobidb-lite (MOBIDB_LITE); mobidb-lite (MOBIDB_LITE); mobidb-lite (MOBIDB_LITE); mobidb-lite (MOBIDB_LITE); mobidb-lite (MOBIDB_LITE); mobidb-lite (MOBIDB_LITE); PTHR10642 (PANTHER); IPR002156 (PROSITE_PROFILES); cd09276 (CDD); IPR012337 (SUPERFAMILY)	hypothetical protein EGW08_013652	P:GO:0090502; F:GO:0003676; F:GO:0004523	P:RNA phosphodiester bond hydrolysis, endonucleolytic; F:nucleic acid binding; F:RNA-DNA hybrid ribonuclease activity
Cnem003279-RA	670	ADF18552.1	30.4	316.2	A0A3P8TFH9	42.6	317.8	no hit	no GO terms	no GO terms	IPR000477 (PFAM); IPR036691 (G3DSA:3.60.10.GENE3D); PTHR19446 (PANTHER); PTHR19446:SF427 (PANTHER); IPR000477 (PROSITE_PROFILES); cd01650 (CDD); IPR043502 (SUPERFAMILY)	hypothetical protein EGW08_012012	no GO terms	no GO terms
Cnem003288-RA	303	GCF53027.1	32.4	162.9	A0A402EWP9	31.6	162.9	no hit	no IPS match	no IPS match	no IPS match	hypothetical protein parPi_0014784	no GO terms	no GO terms
Cnem003291-RA	444	XP_013081034.1	87.1	405.2	A0A2C9JSQ7	87.1	405.2	K20477	no GO terms	no GO terms	IPR014848 (PFAM); IPR014848 (PANTHER)	RAB6A-GEF complex partner protein 2-like isoform X2	no GO terms	no GO terms
Cnem003297-RA	334	XP_005090728.1	74.2	426.0	A0A2C9M8S3	70.2	410.6	no hit	P:GO:0007186; F:GO:0004930; C:GO:0016021	P:G protein-coupled receptor signaling pathway; F:G protein-coupled receptor activity; C:integral component of membrane	IPR000276 (PRINTS); IPR017452 (PFAM); G3DSA:1.20.1070.10 (GENE3D); PTHR46641 (PANTHER); IPR017452 (PROSITE_PROFILES); cd14978 (CDD); SSF81321 (SUPERFAMILY)	FMRFamide receptor-like	no GO terms	no GO terms
Cnem003304-RA	437	no hit	no hit	no hit	no hit	no hit	no hit	no hit	no GO terms	no GO terms	IPR036514 (G3DSA:3.40.50.GENE3D); mobidb-lite (MOBIDB_LITE); mobidb-lite (MOBIDB_LITE); mobidb-lite (MOBIDB_LITE); mobidb-lite (MOBIDB_LITE); mobidb-lite (MOBIDB_LITE); mobidb-lite (MOBIDB_LITE); mobidb-lite (MOBIDB_LITE); cd00229 (CDD); SSF52266 (SUPERFAMILY)	---NA---	no GO terms	no GO terms
Cnem003311-RA	353	RUS79785.1	30.6	130.2	A0A433TAV6	42.5	118.2	no hit	no GO terms	no GO terms	PTHR47027:SF6 (PANTHER); PTHR47027 (PANTHER)	hypothetical protein EGW08_012432	no GO terms	no GO terms
Cnem003315-RA	148	RUS87782.1	74.8	216.5	A0A3S1ABT0	74.8	216.5	no hit	no GO terms	no GO terms	IPR021148 (PFAM); IPR023139 (G3DSA:1.10.3560.GENE3D); IPR008476 (PANTHER)	hypothetical protein EGW08_004447	no GO terms	no GO terms
Cnem003320-RA	1289	CAA65719.1	92.9	714.1	A0A2C9JV47	28.1	405.6	K19832	F:GO:0003676; F:GO:0004523	F:nucleic acid binding; F:RNA-DNA hybrid ribonuclease activity	IPR036397 (G3DSA:3.30.420.GENE3D); IPR000477 (PFAM); IPR002156 (PFAM); G3DSA:3.40.50.300 (GENE3D); IPR036397 (G3DSA:3.30.420.GENE3D); PTHR46406 (PANTHER); IPR002156 (PROSITE_PROFILES); IPR000477 (PROSITE_PROFILES); cd09276 (CDD); IPR012337 (SUPERFAMILY); IPR012337 (SUPERFAMILY); IPR043502 (SUPERFAMILY); IPR027417 (SUPERFAMILY)	br-1 protein	F:GO:0005525	F:GTP binding
Cnem003323-RA	377	NP_001267746.1;AGM37745.1	57.2	235.0	A0A2C9JV44	55.1	226.5	no hit	P:GO:0006811; P:GO:0034220; F:GO:0004888; F:GO:0005216; C:GO:0016021	P:ion transport; P:ion transmembrane transport; F:transmembrane signaling receptor activity; F:ion channel activity; C:integral component of membrane	IPR006029 (PFAM); G3DSA:1.20.58.390 (GENE3D); G3DSA:1.20.58.390 (GENE3D); mobidb-lite (MOBIDB_LITE); IPR006201 (PANTHER); PTHR18945:SF783 (PANTHER); cd19051 (CDD); IPR036719 (SUPERFAMILY)	neuronal acetylcholine receptor subunit alpha-10-like	P:GO:0006811; P:GO:0009987; P:GO:0060078; F:GO:0005230; F:GO:0038023; C:GO:0005886; C:GO:0045202	P:ion transport; P:cellular process; P:regulation of postsynaptic membrane potential; F:extracellular ligand-gated ion channel activity; F:signaling receptor activity; C:plasma membrane; C:synapse
Cnem003326-RA	221	no hit	no hit	no hit	no hit	no hit	no hit	no hit	no GO terms	no GO terms	mobidb-lite (MOBIDB_LITE); mobidb-lite (MOBIDB_LITE)	hypothetical protein EGW08_021432	no GO terms	no GO terms
Cnem003329-RA	375	RUS88711.1	39.8	272.7	A0A433U4I6	39.8	272.7	no hit	F:GO:0003676; F:GO:0004523	F:nucleic acid binding; F:RNA-DNA hybrid ribonuclease activity	IPR036397 (G3DSA:3.30.420.GENE3D); IPR002156 (PFAM); PTHR10642 (PANTHER); PTHR10642:SF0 (PANTHER); IPR002156 (PROSITE_PROFILES); IPR012337 (SUPERFAMILY)	hypothetical protein EGW08_003526	P:GO:0090502; F:GO:0003676; F:GO:0004523	P:RNA phosphodiester bond hydrolysis, endonucleolytic; F:nucleic acid binding; F:RNA-DNA hybrid ribonuclease activity
Cnem003331-RA	274	PVD21563.1	26.5	105.1	A0A2T7NK70	26.5	105.1	no hit	no GO terms	no GO terms	PTHR19446 (PANTHER); PTHR19446:SF425 (PANTHER)	hypothetical protein C0Q70_17361	no GO terms	no GO terms
Cnem003335-RA	138	RUS70961.1	89.2	125.2	A0A433SNY4	89.2	125.2	K11667	P:GO:0006338; C:GO:0031011	P:chromatin remodeling; C:Ino80 complex	IPR013272 (PFAM); mobidb-lite (MOBIDB_LITE); mobidb-lite (MOBIDB_LITE); IPR029525 (PANTHER)	hypothetical protein EGW08_021279	P:GO:0006338; C:GO:0031011	P:chromatin remodeling; C:Ino80 complex
Cnem003337-RA	381	RUS90919.1	43.9	337.0	A0A3S1A548	43.9	337.0	no hit	no IPS match	no IPS match	no IPS match	hypothetical protein EGW08_001316	no GO terms	no GO terms
Cnem003344-RA	766	RUS90528.1	67.0	489.2	A0A3S0ZZG9	67.0	489.2	K14079	F:GO:0016779	F:nucleotidyltransferase activity	G3DSA:1.10.1410.10 (GENE3D); IPR002058 (PFAM); IPR002934 (PFAM); IPR043519 (G3DSA:3.30.460.GENE3D); mobidb-lite (MOBIDB_LITE); mobidb-lite (MOBIDB_LITE); mobidb-lite (MOBIDB_LITE); mobidb-lite (MOBIDB_LITE); PTHR12271 (PANTHER); PTHR12271:SF40 (PANTHER); cd05402 (CDD); SSF81631 (SUPERFAMILY); IPR043519 (SUPERFAMILY)	hypothetical protein EGW08_001705	no GO terms	no GO terms
Cnem003346-RA	878	Q25410.1;CAA59353.1	46.7	629.4	A0A433U8X7	41.8	595.1	K04527	P:GO:0006468; F:GO:0004672; F:GO:0005515; F:GO:0005524	P:protein phosphorylation; F:protein kinase activity; F:protein binding; F:ATP binding	IPR001245 (PRINTS); IPR001245 (PFAM); IPR013783 (G3DSA:2.60.40.GENE3D); G3DSA:1.10.510.10 (GENE3D); G3DSA:3.30.200.20 (GENE3D); mobidb-lite (MOBIDB_LITE); PTHR24416:SF535 (PANTHER); PTHR24416 (PANTHER); IPR000719 (PROSITE_PROFILES); IPR003961 (CDD); cd05032 (CDD); IPR011009 (SUPERFAMILY); IPR036116 (SUPERFAMILY)	RecName: Full=Putative molluscan insulin-related peptide(s) receptor; Contains: RecName: Full=Putative molluscan insulin-related peptide(s) receptor alpha chain; Contains: RecName: Full=Putative molluscan insulin-related peptide(s) receptor beta chain; Flags: Precursor	P:GO:0016310; F:GO:0004672; F:GO:0005488	P:phosphorylation; F:protein kinase activity; F:binding
Cnem003348-RA	415	XP_005096967.1	54.0	379.0	A0A433U8X7	43.6	265.4	no hit	P:GO:0006468; P:GO:0007169; F:GO:0004714; F:GO:0005515; F:GO:0005524; C:GO:0016020	P:protein phosphorylation; P:transmembrane receptor protein tyrosine kinase signaling pathway; F:transmembrane receptor protein tyrosine kinase activity; F:protein binding; F:ATP binding; C:membrane	IPR006211 (PFAM); IPR003961 (PFAM); IPR000494 (PFAM); IPR013783 (G3DSA:2.60.40.GENE3D); IPR036941 (G3DSA:3.80.20.GENE3D); G3DSA:2.10.220.10 (GENE3D); PTHR24416:SF106 (PANTHER); PTHR24416 (PANTHER); IPR003961 (CDD); SSF52058 (SUPERFAMILY); IPR036116 (SUPERFAMILY)	putative molluscan insulin-related peptide(s) receptor	no GO terms	no GO terms
Cnem003354-RA	299	XP_005096967.1	58.6	239.6	A0A433U8X7	57.5	228.4	no hit	no GO terms	no GO terms	IPR000494 (PFAM); IPR036941 (G3DSA:3.80.20.GENE3D); mobidb-lite (MOBIDB_LITE); mobidb-lite (MOBIDB_LITE); PTHR24416 (PANTHER); PTHR24416:SF535 (PANTHER); SSF52058 (SUPERFAMILY)	putative molluscan insulin-related peptide(s) receptor	no GO terms	no GO terms
Cnem003357-RA	97	no hit	no hit	no hit	no hit	no hit	no hit	no hit	no IPS match	no IPS match	no IPS match	---NA---	no GO terms	no GO terms
Cnem003375-RA	335	GBM25278.1	32.4	103.2	A0A2J7QNK5	28.8	84.7	no hit	no GO terms	no GO terms	G3DSA:3.30.420.470 (GENE3D); mobidb-lite (MOBIDB_LITE); mobidb-lite (MOBIDB_LITE); PTHR47027:SF6 (PANTHER); PTHR47027 (PANTHER)	Histone-lysine N-methyltransferase SETMAR	P:GO:0032259; F:GO:0008168; F:GO:0016740	P:methylation; F:methyltransferase activity; F:transferase activity
Cnem003380-RA	586	XP_025102703.1	18.2	80.5	A0A2T7NZ60	26.8	77.0	no hit	no GO terms	no GO terms	Coil (COILS); Coil (COILS); mobidb-lite (MOBIDB_LITE); PTHR46888 (PANTHER)	uncharacterized protein LOC106153310	P:GO:0015074; F:GO:0003676; F:GO:0008270	P:DNA integration; F:nucleic acid binding; F:zinc ion binding
Cnem003381-RA	496	AAO83841.1	67.6	522.3	A0A433U307	60.6	486.5	K04849	P:GO:0006811; P:GO:0055085; P:GO:0070588; F:GO:0005216; F:GO:0005245; C:GO:0005891; C:GO:0016020	P:ion transport; P:transmembrane transport; P:calcium ion transmembrane transport; F:ion channel activity; F:voltage-gated calcium channel activity; C:voltage-gated calcium channel complex; C:membrane	Coil (COILS); IPR002077 (PRINTS); IPR005821 (PFAM); G3DSA:1.10.287.70 (GENE3D); PTHR45628 (PANTHER); PTHR45628:SF3 (PANTHER); PTHR45628 (PANTHER); PTHR45628:SF3 (PANTHER); PTHR45628:SF3 (PANTHER); TRANSMEMBRANE (PHOBIUS); CYTOPLASMIC_DOMAIN (PHOBIUS); NON_CYTOPLASMIC_DOMAIN (PHOBIUS); CYTOPLASMIC_DOMAIN (PHOBIUS); TRANSMEMBRANE (PHOBIUS); TRANSMEMBRANE (PHOBIUS); CYTOPLASMIC_DOMAIN (PHOBIUS); TRA…	Cav2 calcium channel alpha subunit	P:GO:0006816; P:GO:0055085; F:GO:0005244; F:GO:0005262; C:GO:0016021	P:calcium ion transport; P:transmembrane transport; F:voltage-gated ion channel activity; F:calcium channel activity; C:integral component of membrane
Cnem003383-RA	491	XP_013061602.1	53.2	318.9	A0A2C9MAT1	53.2	318.9	no hit	no GO terms	no GO terms	mobidb-lite (MOBIDB_LITE); mobidb-lite (MOBIDB_LITE); mobidb-lite (MOBIDB_LITE); mobidb-lite (MOBIDB_LITE); mobidb-lite (MOBIDB_LITE); mobidb-lite (MOBIDB_LITE); mobidb-lite (MOBIDB_LITE); mobidb-lite (MOBIDB_LITE); mobidb-lite (MOBIDB_LITE); mobidb-lite (MOBIDB_LITE); mobidb-lite (MOBIDB_LITE)	voltage-dependent calcium channel type A subunit alpha-1-like	P:GO:0034765; P:GO:0070588; F:GO:0005245; C:GO:0005891	P:regulation of ion transmembrane transport; P:calcium ion transmembrane transport; F:voltage-gated calcium channel activity; C:voltage-gated calcium channel complex
Cnem003384-RA	306	XP_013080460.1	84.5	530.8	A0A2C9JSB6	84.5	530.8	K01482	no GO terms	no GO terms	Coil (COILS); PF02274 (PFAM); G3DSA:3.75.10.10 (GENE3D); IPR033199 (PANTHER); SSF55909 (SUPERFAMILY)	N(G),N(G)-dimethylarginine dimethylaminohydrolase 1-like isoform X1	no GO terms	no GO terms
Cnem003386-RA	1033	WP_092487680.1	35.9	585.9	A0A3Q1IA94	35.2	570.1	no hit	no GO terms	no GO terms	Coil (COILS); IPR005135 (PFAM); IPR036691 (G3DSA:3.60.10.GENE3D); IPR000477 (PFAM); PTHR47027:SF5 (PANTHER); PTHR47027 (PANTHER); IPR000477 (PROSITE_PROFILES); cd09076 (CDD); cd01650 (CDD); IPR036691 (SUPERFAMILY); IPR043502 (SUPERFAMILY)	hypothetical protein	no GO terms	no GO terms
Cnem003388-RA	571	XP_005108851.1	55.9	547.4	A0A3S0ZCD3	53.1	510.8	K04431	P:GO:0006468; F:GO:0003676; F:GO:0004672; F:GO:0005524	P:protein phosphorylation; F:nucleic acid binding; F:protein kinase activity; F:ATP binding	IPR000719 (SMART); IPR036397 (G3DSA:3.30.420.GENE3D); G3DSA:3.30.200.20 (GENE3D); IPR036691 (G3DSA:3.60.10.GENE3D); G3DSA:1.10.510.10 (GENE3D); IPR000719 (PFAM); mobidb-lite (MOBIDB_LITE); mobidb-lite (MOBIDB_LITE); PTHR47238 (PANTHER); PTHR47238:SF2 (PANTHER); IPR008271 (PROSITE_PATTERNS); IPR000719 (PROSITE_PROFILES); IPR011009 (SUPERFAMILY); IPR036691 (SUPERFAMILY); IPR012337 (SUPERFAMILY)	dual specificity mitogen-activated protein kinase kinase 7-like	no GO terms	no GO terms
Cnem003390-RA	1054	XP_025085055.1	53.8	870.9	A0A3S1B9P2	49.8	801.6	no hit	no GO terms	no GO terms	mobidb-lite (MOBIDB_LITE); mobidb-lite (MOBIDB_LITE); mobidb-lite (MOBIDB_LITE); mobidb-lite (MOBIDB_LITE); mobidb-lite (MOBIDB_LITE); mobidb-lite (MOBIDB_LITE); mobidb-lite (MOBIDB_LITE); PTHR31511 (PANTHER); PTHR31511:SF12 (PANTHER); IPR043502 (SUPERFAMILY)	uncharacterized protein LOC112558684 isoform X2	no GO terms	no GO terms
Cnem003398-RA	664	XP_013076259.1	72.0	455.7	A0A2C9JPK4	70.6	449.1	K12398	P:GO:0006886; P:GO:0016192; F:GO:0003676; F:GO:0004523; C:GO:0030131	P:intracellular protein transport; P:vesicle-mediated transport; F:nucleic acid binding; F:RNA-DNA hybrid ribonuclease activity; C:clathrin adaptor complex	G3DSA:2.60.40.1170 (GENE3D); IPR002156 (PFAM); G3DSA:2.60.40.1170 (GENE3D); IPR036397 (G3DSA:3.30.420.GENE3D); IPR028565 (PFAM); PTHR10529:SF341 (PANTHER); PTHR10529 (PANTHER); IPR018240 (PROSITE_PATTERNS); IPR028565 (PROSITE_PROFILES); IPR002156 (PROSITE_PROFILES); cd09276 (CDD); IPR012337 (SUPERFAMILY); IPR036168 (SUPERFAMILY)	AP-3 complex subunit mu-1-like isoform X2	P:GO:0006886; P:GO:0016192; C:GO:0030131	P:intracellular protein transport; P:vesicle-mediated transport; C:clathrin adaptor complex
Cnem003411-RA	800	XP_005091658.1	27.2	198.4	A0A2C9JI79	45.5	181.8	K04307	F:GO:0003676; F:GO:0004523; F:GO:0005515; C:GO:0016021	F:nucleic acid binding; F:RNA-DNA hybrid ribonuclease activity; F:protein binding; C:integral component of membrane	IPR002172 (PRINTS); IPR002172 (SMART); G3DSA:1.20.1070.10 (GENE3D); IPR036397 (G3DSA:3.30.420.GENE3D); IPR036055 (G3DSA:4.10.400.GENE3D); IPR017452 (PFAM); IPR002172 (PFAM); PTHR24372 (PANTHER); PTHR24372:SF69 (PANTHER); CYTOPLASMIC_DOMAIN (PHOBIUS); NON_CYTOPLASMIC_DOMAIN (PHOBIUS); CYTOPLASMIC_DOMAIN (PHOBIUS); TRANSMEMBRANE (PHOBIUS); CYTOPLASMIC_DOMAIN (PHOBIUS); NON_CYTOPLASMIC_DOMAIN (PHOBI…	G-protein coupled receptor GRL101-like	no GO terms	no GO terms
Cnem003412-RA	272	XP_012939588.1	81.7	303.9	A0A2C9JKR3	73.5	289.3	no hit	P:GO:0007186; F:GO:0004930; C:GO:0016021	P:G protein-coupled receptor signaling pathway; F:G protein-coupled receptor activity; C:integral component of membrane	IPR000276 (PRINTS); IPR017452 (PFAM); G3DSA:1.20.1070.10 (GENE3D); PTHR24243:SF148 (PANTHER); PTHR24243 (PANTHER); IPR000276 (PROSITE_PATTERNS); CYTOPLASMIC_DOMAIN (PHOBIUS); TRANSMEMBRANE (PHOBIUS); NON_CYTOPLASMIC_DOMAIN (PHOBIUS); TRANSMEMBRANE (PHOBIUS); CYTOPLASMIC_DOMAIN (PHOBIUS); IPR017452 (PROSITE_PROFILES); cd15134 (CDD); SSF81321 (SUPERFAMILY); TMhelix (TMHMM); TMhelix (TMHMM)	hypothetical protein EGW08_019359, partial	P:GO:0007218; F:GO:0001607; C:GO:0016021	P:neuropeptide signaling pathway; F:neuromedin U receptor activity; C:integral component of membrane
Cnem003416-RA	232	XP_005101265.1;XP_012939584.1;XP_012939585.1;XP_012939586.1	77.7	358.2	A0A433TBF0	73.1	340.1	K05052	P:GO:0007186; F:GO:0001607; F:GO:0004930; C:GO:0016021	P:G protein-coupled receptor signaling pathway; F:neuromedin U receptor activity; F:G protein-coupled receptor activity; C:integral component of membrane	IPR005390 (PRINTS); IPR000276 (PRINTS); IPR017452 (PFAM); G3DSA:1.20.1070.10 (GENE3D); PTHR24243 (PANTHER); PTHR24243:SF209 (PANTHER); IPR000276 (PROSITE_PATTERNS); CYTOPLASMIC_DOMAIN (PHOBIUS); NON_CYTOPLASMIC_DOMAIN (PHOBIUS); TRANSMEMBRANE (PHOBIUS); NON_CYTOPLASMIC_DOMAIN (PHOBIUS); CYTOPLASMIC_DOMAIN (PHOBIUS); TRANSMEMBRANE (PHOBIUS); TRANSMEMBRANE (PHOBIUS); IPR017452 (PROSITE_PROFILES); c…	neuromedin-U receptor 2-like	no GO terms	no GO terms
Cnem003420-RA	459	XP_020910841.1	31.5	123.6	A0A433U4I6	34.2	121.3	no hit	no GO terms	no GO terms	IPR000477 (PFAM); mobidb-lite (MOBIDB_LITE); PTHR19446 (PANTHER); PTHR19446:SF427 (PANTHER); IPR000477 (PROSITE_PROFILES); IPR043502 (SUPERFAMILY)	PREDICTED: uncharacterized protein LOC106013216	no GO terms	no GO terms
Cnem003439-RA	201	XP_013077843.1	38.0	90.5	A0A2C9LIU0	38.0	90.5	no hit	no GO terms	no GO terms	G3DSA:1.20.1070.10 (GENE3D); NON_CYTOPLASMIC_DOMAIN (PHOBIUS); TRANSMEMBRANE (PHOBIUS); NON_CYTOPLASMIC_DOMAIN (PHOBIUS); CYTOPLASMIC_DOMAIN (PHOBIUS); TRANSMEMBRANE (PHOBIUS); cd00637 (CDD); SSF81321 (SUPERFAMILY); TMhelix (TMHMM); TMhelix (TMHMM)	growth hormone secretagogue receptor type 1-like	P:GO:0007186; F:GO:0008528; C:GO:0016020; C:GO:0016021	P:G protein-coupled receptor signaling pathway; F:G protein-coupled peptide receptor activity; C:membrane; C:integral component of membrane
Cnem003449-RA	127	XP_012938918.1	69.5	123.6	A0A2C9L3F1	55.6	115.9	no hit	no GO terms	no GO terms	G3DSA:1.20.1070.10 (GENE3D); TRANSMEMBRANE (PHOBIUS); NON_CYTOPLASMIC_DOMAIN (PHOBIUS); CYTOPLASMIC_DOMAIN (PHOBIUS); cd15264 (CDD); TMhelix (TMHMM)	corticotropin-releasing factor receptor 1-like	no GO terms	no GO terms
Cnem003452-RA	182	XP_013081254.1;XP_013081255.1	68.0	268.1	A0A2C9JSU6	68.0	268.1	no hit	no GO terms	no GO terms	IPR029044 (G3DSA:3.90.550.GENE3D); IPR000772 (PFAM); G3DSA:2.80.10.50 (GENE3D); PTHR11675 (PANTHER); PTHR11675:SF43 (PANTHER); IPR000772 (PROSITE_PROFILES); IPR000772 (CDD); IPR029044 (SUPERFAMILY); IPR035992 (SUPERFAMILY)	polypeptide N-acetylgalactosaminyltransferase 5-like	P:GO:0006486; F:GO:0016757; F:GO:0030246; C:GO:0000139; C:GO:0016021	P:protein glycosylation; F:transferase activity, transferring glycosyl groups; F:carbohydrate binding; C:Golgi membrane; C:integral component of membrane
Cnem003453-RA	221	XP_012941011.1	65.2	250.0	A0A3S0ZCY4	62.1	246.1	no hit	no GO terms	no GO terms	IPR001173 (PFAM); IPR029044 (G3DSA:3.90.550.GENE3D); PTHR11675 (PANTHER); PTHR11675:SF43 (PANTHER); IPR029044 (SUPERFAMILY)	hypothetical protein EGW08_020172	P:GO:0006486; F:GO:0016757; F:GO:0030246; C:GO:0000139; C:GO:0016021	P:protein glycosylation; F:transferase activity, transferring glycosyl groups; F:carbohydrate binding; C:Golgi membrane; C:integral component of membrane
Cnem003459-RA	175	XP_013081252.1	71.9	257.3	A0A2C9K8J4	71.9	257.3	K03910	C:GO:0005615	C:extracellular space	G3DSA:1.50.10.20 (GENE3D); IPR011626 (PFAM); PTHR11412 (PANTHER); IPR019742 (PROSITE_PATTERNS); IPR008930 (SUPERFAMILY)	alpha-1-inhibitor 3-like isoform X1	P:GO:0010951; F:GO:0004866; C:GO:0005615	P:negative regulation of endopeptidase activity; F:endopeptidase inhibitor activity; C:extracellular space
Cnem003462-RA	203	RUS87822.1	29.0	66.6	A0A433U4I6	28.6	65.1	no hit	no IPS match	no IPS match	no IPS match	hypothetical protein EGW08_013568	no GO terms	no GO terms
Cnem003464-RA	123	XP_013093824.1	72.3	115.2	A0A2C9L3E5	72.3	115.2	no hit	no GO terms	no GO terms	IPR018614 (PFAM); IPR018614 (PANTHER); TRANSMEMBRANE (PHOBIUS); CYTOPLASMIC_DOMAIN (PHOBIUS); NON_CYTOPLASMIC_DOMAIN (PHOBIUS); TMhelix (TMHMM)	keratinocyte-associated protein 2-like isoform X1	C:GO:0016021	C:integral component of membrane
Cnem003465-RA	416	XP_014677047.1	39.9	298.1	A0A3S0ZV17	36.2	232.3	no hit	no GO terms	no GO terms	IPR000477 (PFAM); PTHR19446 (PANTHER); PTHR19446:SF427 (PANTHER); IPR000477 (PROSITE_PROFILES); cd01650 (CDD); IPR043502 (SUPERFAMILY)	PREDICTED: uncharacterized protein LOC106816918	no GO terms	no GO terms
Cnem003468-RA	656	XP_013083361.1	29.9	170.6	A0A2C9M745	29.9	170.6	no hit	no GO terms	no GO terms	mobidb-lite (MOBIDB_LITE); mobidb-lite (MOBIDB_LITE); mobidb-lite (MOBIDB_LITE); mobidb-lite (MOBIDB_LITE); mobidb-lite (MOBIDB_LITE); mobidb-lite (MOBIDB_LITE); mobidb-lite (MOBIDB_LITE); mobidb-lite (MOBIDB_LITE); mobidb-lite (MOBIDB_LITE)	PREDICTED: uncharacterized protein LOC106068526	C:GO:0016020; C:GO:0016021	C:membrane; C:integral component of membrane
Cnem003469-RA	302	GCF53143.1	39.1	110.9	A0A402F9L9	39.1	110.9	no hit	no GO terms	no GO terms	PTHR47027 (PANTHER); PTHR47027:SF6 (PANTHER)	endonuclease-reverse transcriptase	P:GO:0006278; P:GO:0090305; F:GO:0003964; F:GO:0004519	P:RNA-dependent DNA biosynthetic process; P:nucleic acid phosphodiester bond hydrolysis; F:RNA-directed DNA polymerase activity; F:endonuclease activity
Cnem003476-RA	396	KAA3669964.1	44.8	169.9	A0A2G8JHE9	40.1	167.2	no hit	no GO terms	no GO terms	IPR000477 (PFAM); PTHR19446:SF427 (PANTHER); PTHR19446 (PANTHER); NON_CYTOPLASMIC_DOMAIN (PHOBIUS); TRANSMEMBRANE (PHOBIUS); CYTOPLASMIC_DOMAIN (PHOBIUS); IPR000477 (PROSITE_PROFILES)	hypothetical protein BSL78_28030	no GO terms	no GO terms
Cnem003482-RA	231	XP_005108673.1	59.6	241.5	A0A2C9LJS8	47.6	194.9	no hit	P:GO:0007186; F:GO:0004930; C:GO:0016021	P:G protein-coupled receptor signaling pathway; F:G protein-coupled receptor activity; C:integral component of membrane	IPR000276 (PRINTS); IPR017452 (PFAM); G3DSA:1.20.1070.10 (GENE3D); PTHR24243 (PANTHER); TRANSMEMBRANE (PHOBIUS); CYTOPLASMIC_DOMAIN (PHOBIUS); TRANSMEMBRANE (PHOBIUS); NON_CYTOPLASMIC_DOMAIN (PHOBIUS); NON_CYTOPLASMIC_DOMAIN (PHOBIUS); TRANSMEMBRANE (PHOBIUS); CYTOPLASMIC_DOMAIN (PHOBIUS); TRANSMEMBRANE (PHOBIUS); CYTOPLASMIC_DOMAIN (PHOBIUS); NON_CYTOPLASMIC_DOMAIN (PHOBIUS); TRANSMEMBRANE (PHOB…	tachykinin-like peptides receptor 86C	no GO terms	no GO terms
Cnem003483-RA	161	RUS72102.1	59.6	112.1	A0A433SS76	59.6	112.1	K02995	P:GO:0006412; F:GO:0003735; C:GO:0005840	P:translation; F:structural constituent of ribosome; C:ribosome	IPR042563 (G3DSA:1.10.168.GENE3D); IPR001047 (PANTHER); PTHR10394:SF12 (PANTHER)	hypothetical protein EGW08_020128	P:GO:0006412; F:GO:0003735; C:GO:0005840	P:translation; F:structural constituent of ribosome; C:ribosome
Cnem003487-RA	309	RUS80085.1	41.8	103.2	A0A3S1BBB4	41.8	103.2	no hit	F:GO:0003676; F:GO:0004523	F:nucleic acid binding; F:RNA-DNA hybrid ribonuclease activity	IPR036397 (G3DSA:3.30.420.GENE3D); IPR002156 (PFAM); IPR036397 (G3DSA:3.30.420.GENE3D); PTHR10642 (PANTHER); PTHR10642:SF0 (PANTHER); PTHR10642 (PANTHER); PTHR10642:SF0 (PANTHER); IPR002156 (PROSITE_PROFILES); IPR002156 (PROSITE_PROFILES); IPR012337 (SUPERFAMILY); IPR012337 (SUPERFAMILY)	hypothetical protein EGW08_013652	P:GO:0090502; F:GO:0003676; F:GO:0004523	P:RNA phosphodiester bond hydrolysis, endonucleolytic; F:nucleic acid binding; F:RNA-DNA hybrid ribonuclease activity
Cnem003490-RA	418	XP_013094755.1	39.7	206.8	A0A2C9M0W9	39.7	206.8	no hit	P:GO:0006486; C:GO:0016020	P:protein glycosylation; C:membrane	Coil (COILS); IPR002659 (PFAM); mobidb-lite (MOBIDB_LITE); mobidb-lite (MOBIDB_LITE); mobidb-lite (MOBIDB_LITE); IPR002659 (PANTHER); PTHR11214:SF247 (PANTHER); NON_CYTOPLASMIC_DOMAIN (PHOBIUS); SIGNAL_PEPTIDE_H_REGION (PHOBIUS); SIGNAL_PEPTIDE_N_REGION (PHOBIUS); CYTOPLASMIC_DOMAIN (PHOBIUS); SIGNAL_PEPTIDE_C_REGION (PHOBIUS); TRANSMEMBRANE (PHOBIUS); SIGNAL_PEPTIDE (PHOBIUS); TMhelix (TMHMM)	beta-1,3-galactosyltransferase 1-like	C:GO:0016020	C:membrane
Cnem003492-RA	225	XP_013083418.1;XP_013083419.1	75.6	380.6	A0A2C9LCK1	75.6	380.6	no hit	no GO terms	no GO terms	PTHR47020 (PANTHER)	PREDICTED: uncharacterized protein LOC106068554	no GO terms	no GO terms
Cnem003493-RA	1298	XP_005113074.1;XP_005113075.1	83.8	2251.1	A0A3S1A2M9	82.5	2224.1	no hit	no GO terms	no GO terms	IPR002931 (SMART); IPR002931 (PFAM); G3DSA:3.10.620.30 (GENE3D); PTHR47020 (PANTHER); IPR038765 (SUPERFAMILY); IPR038765 (SUPERFAMILY)	PREDICTED: uncharacterized protein LOC101849429	no GO terms	no GO terms
Cnem003496-RA	334	no hit	no hit	no hit	no hit	no hit	no hit	no hit	F:GO:0003676; F:GO:0004523	F:nucleic acid binding; F:RNA-DNA hybrid ribonuclease activity	IPR036397 (G3DSA:3.30.420.GENE3D); IPR002156 (PFAM); mobidb-lite (MOBIDB_LITE); IPR002156 (PROSITE_PROFILES); IPR012337 (SUPERFAMILY)	hypothetical protein EGW08_003526	P:GO:0090502; F:GO:0003676; F:GO:0004523	P:RNA phosphodiester bond hydrolysis, endonucleolytic; F:nucleic acid binding; F:RNA-DNA hybrid ribonuclease activity
Cnem003507-RA	205	RUS70812.1	44.3	70.9	A0A433SNT6	44.3	70.9	no hit	no GO terms	no GO terms	Coil (COILS); mobidb-lite (MOBIDB_LITE); mobidb-lite (MOBIDB_LITE); mobidb-lite (MOBIDB_LITE); mobidb-lite (MOBIDB_LITE)	---NA---	no GO terms	no GO terms
Cnem003516-RA	117	no hit	no hit	no hit	no hit	no hit	no hit	no hit	no IPS match	no IPS match	no IPS match	hypothetical protein EGW08_021432	no GO terms	no GO terms
Cnem003518-RA	561	XP_014677047.1	51.8	516.2	W4Y5A2	43.8	424.9	no hit	no GO terms	no GO terms	IPR000477 (PFAM); PTHR19446 (PANTHER); PTHR19446:SF427 (PANTHER); IPR000477 (PROSITE_PROFILES); cd01650 (CDD); IPR043502 (SUPERFAMILY)	PREDICTED: uncharacterized protein LOC106816918	no GO terms	no GO terms
Cnem003519-RA	142	no hit	no hit	no hit	no hit	no hit	no hit	no hit	no GO terms	no GO terms	mobidb-lite (MOBIDB_LITE)	---NA---	no GO terms	no GO terms
Cnem003538-RA	206	XP_014677047.1	51.0	147.1	A0A3S0ZV17	46.1	127.1	no hit	no GO terms	no GO terms	IPR000477 (PFAM); PTHR19446 (PANTHER); PTHR19446:SF427 (PANTHER); IPR000477 (PROSITE_PROFILES); IPR043502 (SUPERFAMILY)	PREDICTED: uncharacterized protein LOC106816918	no GO terms	no GO terms
Cnem003539-RA	427	XP_012940139.1	63.5	531.9	V4B2B8	50.8	399.1	K13752	P:GO:0055085; C:GO:0016021	P:transmembrane transport; C:integral component of membrane	G3DSA:1.20.1420.30 (GENE3D); IPR004837 (PFAM); IPR004481 (TIGRFAM); IPR004481 (PANTHER); TRANSMEMBRANE (PHOBIUS); NON_CYTOPLASMIC_DOMAIN (PHOBIUS); TRANSMEMBRANE (PHOBIUS); NON_CYTOPLASMIC_DOMAIN (PHOBIUS); CYTOPLASMIC_DOMAIN (PHOBIUS); TRANSMEMBRANE (PHOBIUS); CYTOPLASMIC_DOMAIN (PHOBIUS); CYTOPLASMIC_DOMAIN (PHOBIUS); CYTOPLASMIC_DOMAIN (PHOBIUS); TRANSMEMBRANE (PHOBIUS); NON_CYTOPLASMIC_DOMAIN…	probable sodium/potassium/calcium exchanger CG1090	no GO terms	no GO terms
Cnem003540-RA	236	XP_005089882.1;XP_012938323.1	78.5	389.4	A0A2C9K591	78.1	382.9	K01823	P:GO:0008299; F:GO:0004452; F:GO:0016787	P:isoprenoid biosynthetic process; F:isopentenyl-diphosphate delta-isomerase activity; F:hydrolase activity	IPR011876 (PIRSF); IPR011876 (TIGRFAM); G3DSA:3.90.79.10 (GENE3D); IPR000086 (PFAM); PTHR10885 (PANTHER); PTHR10885:SF0 (PANTHER); IPR000086 (PROSITE_PROFILES); IPR011876 (CDD); IPR015797 (SUPERFAMILY)	isopentenyl-diphosphate Delta-isomerase 1-like isoform X1	no GO terms	no GO terms
Cnem003541-RA	731	XP_005106443.1	75.0	1101.3	A0A2C9KMG3	72.1	1046.2	K00914	P:GO:0046854; P:GO:0048015; F:GO:0016301; F:GO:0016303	P:phosphatidylinositol phosphorylation; P:phosphatidylinositol-mediated signaling; F:kinase activity; F:1-phosphatidylinositol-3-kinase activity	Coil (COILS); IPR002420 (SMART); IPR001263 (SMART); IPR001263 (PFAM); IPR008290 (PIRSF); IPR000403 (PFAM); IPR002420 (PFAM); G3DSA:3.30.1010.10 (GENE3D); IPR035892 (G3DSA:2.60.40.GENE3D); IPR042236 (G3DSA:1.25.40.GENE3D); mobidb-lite (MOBIDB_LITE); PTHR10048:SF7 (PANTHER); IPR015433 (PANTHER); IPR018936 (PROSITE_PATTERNS); IPR001263 (PROSITE_PROFILES); IPR002420 (PROSITE_PROFILES); IPR000403 (PRO…	phosphatidylinositol 3-kinase catalytic subunit type 3-like	no GO terms	no GO terms
Cnem003543-RA	333	XP_005100430.1	64.0	217.2	A0A2C9K3I2	73.4	214.9	no hit	no GO terms	no GO terms	mobidb-lite (MOBIDB_LITE); mobidb-lite (MOBIDB_LITE); PTHR31214:SF3 (PANTHER); IPR026755 (PANTHER)	protein FAM221B-like	no GO terms	no GO terms
Cnem003550-RA	155	NP_001191647.1;AAQ67660.1	83.1	127.5	A0A433U5K5	85.1	124.8	K12846	P:GO:0008380	P:RNA splicing	IPR013957 (PFAM); mobidb-lite (MOBIDB_LITE); mobidb-lite (MOBIDB_LITE); mobidb-lite (MOBIDB_LITE); PTHR31077 (PANTHER); PTHR31077:SF1 (PANTHER)	hypothetical protein EGW08_003181	P:GO:0008380	P:RNA splicing
Cnem003552-RA	189	CFW94154.1	94.8	287.3	A0A0V0XXP7	94.8	286.2	K02183	P:GO:0019722; F:GO:0005509	P:calcium-mediated signaling; F:calcium ion binding	Coil (COILS); IPR002048 (SMART); G3DSA:1.10.238.10 (GENE3D); G3DSA:1.10.238.10 (GENE3D); IPR002048 (PFAM); G3DSA:1.10.238.10 (GENE3D); IPR039030 (PTHR23050:PANTHER); PTHR23050 (PANTHER); IPR018247 (PROSITE_PATTERNS); IPR018247 (PROSITE_PATTERNS); IPR018247 (PROSITE_PATTERNS); IPR018247 (PROSITE_PATTERNS); IPR002048 (PROSITE_PROFILES); IPR002048 (PROSITE_PROFILES); IPR002048 (PROSITE_PROFILES); IP…	Calmodulin, partial	P:GO:0019722; F:GO:0005509	P:calcium-mediated signaling; F:calcium ion binding
Cnem003555-RA	195	RUS89376.1	47.4	91.7	A0A3S1CD12	47.4	91.7	no hit	no GO terms	no GO terms	PTHR47027:SF6 (PANTHER); PTHR47027 (PANTHER); PTHR47027 (PANTHER)	hypothetical protein EGW08_002896	F:GO:0005524; C:GO:0016021	F:ATP binding; C:integral component of membrane
Cnem003559-RA	420	XP_013096124.1	67.7	526.2	A0A2C9K362	67.7	526.2	K04139	P:GO:0007186; F:GO:0004930; C:GO:0016021	P:G protein-coupled receptor signaling pathway; F:G protein-coupled receptor activity; C:integral component of membrane	IPR000276 (PRINTS); G3DSA:1.20.1070.10 (GENE3D); IPR017452 (PFAM); G3DSA:1.20.1070.10 (GENE3D); mobidb-lite (MOBIDB_LITE); mobidb-lite (MOBIDB_LITE); mobidb-lite (MOBIDB_LITE); PTHR24248:SF66 (PANTHER); PTHR24248 (PANTHER); CYTOPLASMIC_DOMAIN (PHOBIUS); NON_CYTOPLASMIC_DOMAIN (PHOBIUS); TRANSMEMBRANE (PHOBIUS); NON_CYTOPLASMIC_DOMAIN (PHOBIUS); CYTOPLASMIC_DOMAIN (PHOBIUS); CYTOPLASMIC_DOMAIN (PH…	alpha-2C adrenergic receptor-like	P:GO:0007186; F:GO:0004930; C:GO:0016021	P:G protein-coupled receptor signaling pathway; F:G protein-coupled receptor activity; C:integral component of membrane
Cnem003565-RA	281	XP_012946463.1	49.7	179.9	A0A210QWK4	44.0	160.2	no hit	no GO terms	no GO terms	mobidb-lite (MOBIDB_LITE); PTHR46928 (PANTHER); PTHR46928:SF1 (PANTHER)	mesenchyme-specific cell surface glycoprotein-like	no GO terms	no GO terms
Cnem003566-RA	153	XP_012938773.1	46.3	66.6	A0A2C9JX13	50.6	63.2	no hit	no IPS match	no IPS match	no IPS match	60S ribosomal protein L13	no GO terms	no GO terms
Cnem003571-RA	489	no hit	no hit	no hit	no hit	no hit	no hit	no hit	no GO terms	no GO terms	mobidb-lite (MOBIDB_LITE)	hypothetical protein	no GO terms	no GO terms
Cnem003575-RA	794	RUS87701.1	47.1	300.4	A0A433U1J7	47.1	300.4	K07962	F:GO:0005525	F:GTP binding	Coil (COILS); Coil (COILS); IPR006689 (PRINTS); SM00178 (SMART); SM00177 (SMART); IPR006689 (PFAM); IPR005225 (TIGRFAM); G3DSA:3.40.50.300 (GENE3D); mobidb-lite (MOBIDB_LITE); mobidb-lite (MOBIDB_LITE); mobidb-lite (MOBIDB_LITE); mobidb-lite (MOBIDB_LITE); mobidb-lite (MOBIDB_LITE); mobidb-lite (MOBIDB_LITE); mobidb-lite (MOBIDB_LITE); mobidb-lite (MOBIDB_LITE); mobidb-lite (MOBIDB_LITE); mobidb-…	myb-like protein X	no GO terms	no GO terms
Cnem003577-RA	348	RUS81811.1	40.2	175.6	A0A3S1BEI4	40.2	175.6	no hit	F:GO:0003676; F:GO:0004523	F:nucleic acid binding; F:RNA-DNA hybrid ribonuclease activity	IPR036397 (G3DSA:3.30.420.GENE3D); IPR002156 (PFAM); PTHR10642 (PANTHER); IPR002156 (PROSITE_PROFILES); cd09276 (CDD); IPR012337 (SUPERFAMILY)	uncharacterized protein LOC111106094	no GO terms	no GO terms
Cnem003580-RA	962	XP_005097964.1	68.4	250.8	A0A2T7P548	65.8	222.2	K20068	F:GO:0005509; F:GO:0005515	F:calcium ion binding; F:protein binding	IPR000261 (SMART); IPR000261 (PFAM); IPR027856 (PFAM); IPR001888 (PFAM); G3DSA:3.30.420.470 (GENE3D); mobidb-lite (MOBIDB_LITE); PTHR46060 (PANTHER); IPR018247 (PROSITE_PATTERNS); IPR000261 (PROSITE_PROFILES); IPR002048 (PROSITE_PROFILES); IPR000477 (PROSITE_PROFILES); cd01648 (CDD); IPR000261 (CDD); IPR011992 (SUPERFAMILY)	hypothetical protein OCBIM_22016098mg, partial	no GO terms	no GO terms
Cnem003584-RA	514	XP_012941573.1	57.8	404.4	H9GUQ1	53.0	391.7	no hit	no GO terms	no GO terms	Coil (COILS); IPR013087 (SMART); IPR013087 (PFAM); G3DSA:3.30.160.60 (GENE3D); G3DSA:3.30.160.60 (GENE3D); G3DSA:3.30.160.60 (GENE3D); G3DSA:3.30.160.60 (GENE3D); G3DSA:3.30.160.60 (GENE3D); PTHR23226 (PANTHER); PTHR23226:SF244 (PANTHER); PTHR23226 (PANTHER); IPR013087 (PROSITE_PATTERNS); IPR013087 (PROSITE_PATTERNS); IPR013087 (PROSITE_PATTERNS); IPR013087 (PROSITE_PATTERNS); IPR013087 (PROSITE_…	histone-lysine N-methyltransferase PRDM9-like	no GO terms	no GO terms
Cnem003587-RA	470	XP_005097961.1	97.2	872.5	A0A3S1BD68	92.7	845.5	K10752	F:GO:0005515	F:protein binding	IPR020472 (PRINTS); IPR001680 (SMART); IPR022052 (PFAM); IPR001680 (PFAM); IPR015943 (G3DSA:2.130.10.GENE3D); PTHR22850 (PANTHER); PTHR22850:SF90 (PANTHER); IPR019775 (PROSITE_PATTERNS); IPR019775 (PROSITE_PATTERNS); IPR019775 (PROSITE_PATTERNS); NON_CYTOPLASMIC_DOMAIN (PHOBIUS); SIGNAL_PEPTIDE_H_REGION (PHOBIUS); SIGNAL_PEPTIDE_N_REGION (PHOBIUS); SIGNAL_PEPTIDE_C_REGION (PHOBIUS); SIGNAL_PEPTID…	histone-binding protein RBBP4 isoform X4	no GO terms	no GO terms
Cnem003590-RA	334	RUS88711.1	46.1	152.5	A0A433U4I6	46.1	152.5	no hit	no GO terms	no GO terms	mobidb-lite (MOBIDB_LITE); mobidb-lite (MOBIDB_LITE)	hypothetical protein EGW08_012163	P:GO:0090502; F:GO:0003676; F:GO:0004523	P:RNA phosphodiester bond hydrolysis, endonucleolytic; F:nucleic acid binding; F:RNA-DNA hybrid ribonuclease activity
Cnem003594-RA	755	XP_012941316.1	36.7	146.4	A0A2J7QMT0	54.3	98.6	no hit	F:GO:0003676; F:GO:0004523	F:nucleic acid binding; F:RNA-DNA hybrid ribonuclease activity	Coil (COILS); IPR002156 (PFAM); IPR036397 (G3DSA:3.30.420.GENE3D); PTHR10642 (PANTHER); SIGNAL_PEPTIDE_N_REGION (PHOBIUS); SIGNAL_PEPTIDE (PHOBIUS); SIGNAL_PEPTIDE_H_REGION (PHOBIUS); NON_CYTOPLASMIC_DOMAIN (PHOBIUS); SIGNAL_PEPTIDE_C_REGION (PHOBIUS); IPR002156 (PROSITE_PROFILES); cd09276 (CDD); SignalP-noTM (SIGNALP_EUK); IPR012337 (SUPERFAMILY)	hypothetical protein EGW08_003526	P:GO:0090502; F:GO:0003676; F:GO:0004523	P:RNA phosphodiester bond hydrolysis, endonucleolytic; F:nucleic acid binding; F:RNA-DNA hybrid ribonuclease activity
Cnem003595-RA	756	RUS81118.1	35.3	212.2	A0A3S1BHX3	35.3	212.2	no hit	no GO terms	no GO terms	mobidb-lite (MOBIDB_LITE); mobidb-lite (MOBIDB_LITE); mobidb-lite (MOBIDB_LITE); mobidb-lite (MOBIDB_LITE); mobidb-lite (MOBIDB_LITE); mobidb-lite (MOBIDB_LITE); PTHR19446:SF411 (PANTHER); PTHR19446 (PANTHER)	hypothetical protein EGW08_011104, partial	no GO terms	no GO terms
Cnem003598-RA	528	XP_005097935.1	40.6	164.9	A0A3S0ZYQ8	32.1	121.7	no hit	F:GO:0003676; F:GO:0004523	F:nucleic acid binding; F:RNA-DNA hybrid ribonuclease activity	IPR036691 (G3DSA:3.60.10.GENE3D); IPR002156 (PFAM); IPR036397 (G3DSA:3.30.420.GENE3D); IPR005135 (PFAM); PTHR10642:SF0 (PANTHER); PTHR10642 (PANTHER); IPR002156 (PROSITE_PROFILES); cd09276 (CDD); IPR036691 (SUPERFAMILY); IPR012337 (SUPERFAMILY)	hypothetical protein EGW08_003526	P:GO:0090502; F:GO:0003676; F:GO:0004523	P:RNA phosphodiester bond hydrolysis, endonucleolytic; F:nucleic acid binding; F:RNA-DNA hybrid ribonuclease activity
Cnem003602-RA	475	RUS88711.1	31.8	254.6	A0A433U4I6	31.8	254.6	no hit	no GO terms	no GO terms	NON_CYTOPLASMIC_DOMAIN (PHOBIUS); TRANSMEMBRANE (PHOBIUS); CYTOPLASMIC_DOMAIN (PHOBIUS); SIGNAL_PEPTIDE (PHOBIUS); SIGNAL_PEPTIDE_N_REGION (PHOBIUS); SIGNAL_PEPTIDE_C_REGION (PHOBIUS); SIGNAL_PEPTIDE_H_REGION (PHOBIUS); IPR000477 (PROSITE_PROFILES); SignalP-noTM (SIGNALP_EUK)	hypothetical protein EGW08_003526	P:GO:0090502; F:GO:0003676; F:GO:0004523	P:RNA phosphodiester bond hydrolysis, endonucleolytic; F:nucleic acid binding; F:RNA-DNA hybrid ribonuclease activity
Cnem003608-RA	200	GCF48632.1	28.3	83.6	A0A402EWN2	28.3	83.6	no hit	no GO terms	no GO terms	Coil (COILS); PTHR47027:SF6 (PANTHER); PTHR47027 (PANTHER)	hypothetical protein parPi_0011830	no GO terms	no GO terms
Cnem003610-RA	2425	no hit	no hit	no hit	no hit	no hit	no hit	no hit	no GO terms	no GO terms	mobidb-lite (MOBIDB_LITE); mobidb-lite (MOBIDB_LITE); mobidb-lite (MOBIDB_LITE); mobidb-lite (MOBIDB_LITE); mobidb-lite (MOBIDB_LITE); mobidb-lite (MOBIDB_LITE); mobidb-lite (MOBIDB_LITE); mobidb-lite (MOBIDB_LITE); PTHR47883:SF1 (PANTHER); PTHR47883:SF1 (PANTHER); PTHR47883 (PANTHER); PTHR47883:SF1 (PANTHER); PTHR47883 (PANTHER); PTHR47883:SF1 (PANTHER); PTHR47883 (PANTHER); PTHR47883 (PANTHER)	Eukaryotic translation initiation factor 3 subunit A	P:GO:0006413; P:GO:0006869; P:GO:0042157; F:GO:0003743; F:GO:0008289; C:GO:0005576	P:translational initiation; P:lipid transport; P:lipoprotein metabolic process; F:translation initiation factor activity; F:lipid binding; C:extracellular region
Cnem003612-RA	123	XP_012944785.1	86.9	235.3	A0A2C9JTH8	81.3	224.9	no hit	no GO terms	no GO terms	IPR000859 (SMART); IPR035914 (G3DSA:2.60.120.GENE3D); IPR000859 (PFAM); PTHR47537 (PANTHER); PTHR47537:SF2 (PANTHER); IPR000859 (PROSITE_PROFILES); IPR000859 (CDD); IPR035914 (SUPERFAMILY)	suppressor of lurcher protein 1-like	no GO terms	no GO terms
Cnem003615-RA	357	XP_019641511.1	34.4	182.6	A0A3S1A548	55.9	143.3	no hit	no GO terms	no GO terms	IPR000477 (PFAM); mobidb-lite (MOBIDB_LITE); NON_CYTOPLASMIC_DOMAIN (PHOBIUS); TRANSMEMBRANE (PHOBIUS); NON_CYTOPLASMIC_DOMAIN (PHOBIUS); CYTOPLASMIC_DOMAIN (PHOBIUS); TRANSMEMBRANE (PHOBIUS); IPR000477 (PROSITE_PROFILES); TMhelix (TMHMM); TMhelix (TMHMM)	PREDICTED: uncharacterized protein LOC109482994	no GO terms	no GO terms
Cnem003617-RA	1183	PNF37616.1	23.4	193.7	A0A3S1BCT8	24.1	222.6	no hit	F:GO:0003676; F:GO:0004523	F:nucleic acid binding; F:RNA-DNA hybrid ribonuclease activity	IPR005135 (PFAM); IPR002156 (PFAM); IPR036397 (G3DSA:3.30.420.GENE3D); IPR036691 (G3DSA:3.60.10.GENE3D); IPR000477 (PFAM); PTHR19446 (PANTHER); PTHR19446:SF425 (PANTHER); CYTOPLASMIC_DOMAIN (PHOBIUS); NON_CYTOPLASMIC_DOMAIN (PHOBIUS); TRANSMEMBRANE (PHOBIUS); IPR002156 (PROSITE_PROFILES); IPR000477 (PROSITE_PROFILES); cd01650 (CDD); IPR036691 (SUPERFAMILY); IPR043502 (SUPERFAMILY); IPR012337 (SUP…	hypothetical protein EGW08_003526	P:GO:0090502; F:GO:0003676; F:GO:0004523	P:RNA phosphodiester bond hydrolysis, endonucleolytic; F:nucleic acid binding; F:RNA-DNA hybrid ribonuclease activity
Cnem003623-RA	373	XP_005113519.1	48.7	395.6	A0A3S0ZPX3	48.1	365.2	no hit	no GO terms	no GO terms	IPR029526 (PFAM); PTHR46599 (PANTHER)	piggyBac transposable element-derived protein 4-like	no GO terms	no GO terms
Cnem003627-RA	225	RUS89376.1	50.5	98.6	A0A3S1CD12	50.5	98.6	no hit	no GO terms	no GO terms	mobidb-lite (MOBIDB_LITE); mobidb-lite (MOBIDB_LITE); PTHR47027 (PANTHER); PTHR47027:SF6 (PANTHER); CYTOPLASMIC_DOMAIN (PHOBIUS); NON_CYTOPLASMIC_DOMAIN (PHOBIUS); TRANSMEMBRANE (PHOBIUS); IPR016024 (SUPERFAMILY)	hypothetical protein EGW08_002896	F:GO:0005524; C:GO:0016021	F:ATP binding; C:integral component of membrane
Cnem003628-RA	158	RUS75316.1	28.9	64.3	A0A3S0ZU31	28.9	64.3	no hit	no GO terms	no GO terms	PTHR47027:SF6 (PANTHER); PTHR47027 (PANTHER); IPR000477 (PROSITE_PROFILES)	hypothetical protein parPi_0034070, partial	no GO terms	no GO terms
Cnem003630-RA	385	XP_012937883.1	32.9	82.4	A0A2C9KNR6	28.9	74.7	no hit	no GO terms	no GO terms	IPR013783 (G3DSA:2.60.40.GENE3D); mobidb-lite (MOBIDB_LITE); mobidb-lite (MOBIDB_LITE); IPR036179 (SUPERFAMILY)	vascular endothelial growth factor receptor 3-like	no GO terms	no GO terms
Cnem003632-RA	138	XP_013075054.1	95.5	233.0	A0A2C9KNR6	95.5	233.0	no hit	P:GO:0006468; F:GO:0004672; F:GO:0004713; F:GO:0005524	P:protein phosphorylation; F:protein kinase activity; F:protein tyrosine kinase activity; F:ATP binding	IPR020635 (SMART); IPR001245 (PFAM); G3DSA:1.10.510.10 (GENE3D); PTHR24416:SF251 (PANTHER); PTHR24416 (PANTHER); IPR008266 (PROSITE_PATTERNS); IPR000719 (PROSITE_PROFILES); IPR011009 (SUPERFAMILY)	vascular endothelial growth factor receptor 3-like	no GO terms	no GO terms
Cnem003633-RA	230	XP_013075054.1	51.0	177.9	A0A2C9KNR6	51.0	177.9	no hit	P:GO:0006468; F:GO:0004672	P:protein phosphorylation; F:protein kinase activity	IPR001245 (PFAM); G3DSA:1.10.510.10 (GENE3D); mobidb-lite (MOBIDB_LITE); mobidb-lite (MOBIDB_LITE); mobidb-lite (MOBIDB_LITE); PTHR24416 (PANTHER); PTHR24416:SF390 (PANTHER)	vascular endothelial growth factor receptor 1-like	P:GO:0006468; F:GO:0000166; F:GO:0004713; C:GO:0016020	P:protein phosphorylation; F:nucleotide binding; F:protein tyrosine kinase activity; C:membrane
Cnem003634-RA	186	SMN17540.1	44.5	102.8	A0A3B3I5N2	48.4	93.2	no hit	F:GO:0003677	F:DNA binding	PF13518 (PFAM); IPR036388 (G3DSA:1.10.10.GENE3D); IPR009057 (SUPERFAMILY)	uncharacterized protein LOC105321473	no GO terms	no GO terms
Cnem003637-RA	324	XP_012946242.1	48.4	92.8	no hit	no hit	no hit	no hit	no GO terms	no GO terms	Coil (COILS); mobidb-lite (MOBIDB_LITE); mobidb-lite (MOBIDB_LITE)	---NA---	no GO terms	no GO terms
Cnem003642-RA	770	XP_013075053.1	60.4	916.4	A0A2C9MAK5	60.4	916.4	K16498	P:GO:0007155; P:GO:0007156; F:GO:0005509; C:GO:0005886; C:GO:0016020	P:cell adhesion; P:homophilic cell adhesion via plasma membrane adhesion molecules; F:calcium ion binding; C:plasma membrane; C:membrane	IPR002126 (PRINTS); IPR002126 (SMART); IPR002126 (PFAM); IPR013164 (PFAM); G3DSA:2.60.40.60 (GENE3D); G3DSA:2.60.40.60 (GENE3D); G3DSA:2.60.40.60 (GENE3D); G3DSA:2.60.40.60 (GENE3D); G3DSA:2.60.40.60 (GENE3D); PTHR24028:SF257 (PANTHER); PTHR24028 (PANTHER); PTHR24028 (PANTHER); IPR020894 (PROSITE_PATTERNS); IPR020894 (PROSITE_PATTERNS); IPR020894 (PROSITE_PATTERNS); IPR020894 (PROSITE_PATTERNS); …	PREDICTED: protocadherin-9-like	P:GO:0007156; F:GO:0005509; C:GO:0005886; C:GO:0016021	P:homophilic cell adhesion via plasma membrane adhesion molecules; F:calcium ion binding; C:plasma membrane; C:integral component of membrane
Cnem003650-RA	414	RUS89376.1	47.5	122.5	W4Y5A2	48.9	87.0	no hit	no GO terms	no GO terms	PTHR47027:SF6 (PANTHER); PTHR47027 (PANTHER)	hypothetical protein EGW08_002896	F:GO:0005524; C:GO:0016021	F:ATP binding; C:integral component of membrane
Cnem003659-RA	247	XP_012942649.1	47.3	67.0	no hit	no hit	no hit	no hit	F:GO:0003676	F:nucleic acid binding	IPR036397 (G3DSA:3.30.420.GENE3D); TRANSMEMBRANE (PHOBIUS); NON_CYTOPLASMIC_DOMAIN (PHOBIUS); CYTOPLASMIC_DOMAIN (PHOBIUS); IPR012337 (SUPERFAMILY)	PREDICTED: uncharacterized protein LOC106012357, partial	no GO terms	no GO terms
Cnem003668-RA	725	XP_013075079.1;XP_013075080.1;XP_013075082.1	68.1	886.3	A0A2C9JNR3	68.1	886.3	no hit	no GO terms	no GO terms	IPR004878 (PFAM); IPR004878 (PANTHER); NON_CYTOPLASMIC_DOMAIN (PHOBIUS); CYTOPLASMIC_DOMAIN (PHOBIUS); TRANSMEMBRANE (PHOBIUS); NON_CYTOPLASMIC_DOMAIN (PHOBIUS); TRANSMEMBRANE (PHOBIUS); CYTOPLASMIC_DOMAIN (PHOBIUS); TRANSMEMBRANE (PHOBIUS); TRANSMEMBRANE (PHOBIUS); TRANSMEMBRANE (PHOBIUS); TRANSMEMBRANE (PHOBIUS); TRANSMEMBRANE (PHOBIUS); TRANSMEMBRANE (PHOBIUS); CYTOPLASMIC_DOMAIN (PHOBIUS); TR…	PREDICTED: uncharacterized protein LOC106061469 isoform X2	C:GO:0016021	C:integral component of membrane
Cnem003669-RA	302	RUS87822.1	30.9	92.4	A0A433U1X1	30.9	92.4	no hit	no GO terms	no GO terms	mobidb-lite (MOBIDB_LITE); IPR012337 (SUPERFAMILY)	hypothetical protein EGW08_008040	P:GO:0090502; F:GO:0003676; F:GO:0004523	P:RNA phosphodiester bond hydrolysis, endonucleolytic; F:nucleic acid binding; F:RNA-DNA hybrid ribonuclease activity
Cnem003671-RA	354	RUS85604.1	71.4	147.9	A0A433TVL5	71.4	147.9	K20363	no GO terms	no GO terms	PTHR21236:SF2 (PANTHER); PTHR21236 (PANTHER)	hypothetical protein EGW08_021342, partial	F:GO:0030280; C:GO:0001533	F:structural constituent of skin epidermis; C:cornified envelope
Cnem003672-RA	656	RUS80311.1	56.5	674.5	A0A3S1BBQ0	56.5	674.5	no hit	F:GO:0005524	F:ATP binding	IPR003593 (SMART); IPR041569 (PFAM); G3DSA:1.10.8.60 (GENE3D); G3DSA:3.40.50.300 (GENE3D); G3DSA:3.40.50.300 (GENE3D); IPR003959 (PFAM); G3DSA:3.40.50.300 (GENE3D); G3DSA:1.10.8.60 (GENE3D); PTHR23077 (PANTHER); IPR003960 (PROSITE_PATTERNS); cd00009 (CDD); cd00009 (CDD); IPR027417 (SUPERFAMILY); IPR027417 (SUPERFAMILY)	spermatogenesis-associated protein 5-like	F:GO:0005524	F:ATP binding
Cnem003674-RA	211	XP_023951013.1	37.2	127.9	A0A3S2L0R7	38.0	119.4	no hit	no GO terms	no GO terms	Coil (COILS); PTHR47027:SF6 (PANTHER); PTHR47027 (PANTHER); IPR043502 (SUPERFAMILY)	hypothetical protein parPi_0007398	no GO terms	no GO terms
Cnem003675-RA	212	XP_013075062.1;XP_013075063.1;XP_013075064.1	82.2	344.0	A0A2C9K9I4	82.2	344.0	K02564	P:GO:0005975; P:GO:0006044; F:GO:0004342	P:carbohydrate metabolic process; P:N-acetylglucosamine metabolic process; F:glucosamine-6-phosphate deaminase activity	IPR006148 (PFAM); G3DSA:3.40.50.1360 (GENE3D); IPR004547 (TIGRFAM); IPR004547 (PANTHER); PTHR11280:SF8 (PANTHER); IPR018321 (PROSITE_PATTERNS); IPR004547 (CDD); IPR037171 (SUPERFAMILY)	glucosamine-6-phosphate isomerase 2-like	P:GO:0005975; P:GO:0006044; F:GO:0004342; C:GO:0005737	P:carbohydrate metabolic process; P:N-acetylglucosamine metabolic process; F:glucosamine-6-phosphate deaminase activity; C:cytoplasm
Cnem003678-RA	560	XP_013077345.1	40.6	206.1	A0A2C9KNR5	40.6	206.1	no hit	no GO terms	no GO terms	G3DSA:2.60.450.20 (GENE3D); IPR007074 (PFAM); PTHR43404 (PANTHER)	PREDICTED: uncharacterized protein LOC106063496, partial	C:GO:0016020; C:GO:0016021	C:membrane; C:integral component of membrane
Cnem003681-RA	204	WP_142759453.1;GBZ63276.1	40.9	120.6	A0A3Q1MDY8	42.1	122.9	no hit	no GO terms	no GO terms	Coil (COILS); IPR000477 (PFAM); mobidb-lite (MOBIDB_LITE); mobidb-lite (MOBIDB_LITE); PTHR19446 (PANTHER); PTHR19446:SF427 (PANTHER)	hypothetical protein M91_02532, partial	no GO terms	no GO terms
Cnem003682-RA	486	RUS81811.1	46.7	191.8	A0A3S1BEI4	46.7	191.8	no hit	F:GO:0003676; F:GO:0004523	F:nucleic acid binding; F:RNA-DNA hybrid ribonuclease activity	Coil (COILS); IPR036397 (G3DSA:3.30.420.GENE3D); IPR002156 (PFAM); IPR000477 (PFAM); mobidb-lite (MOBIDB_LITE); mobidb-lite (MOBIDB_LITE); PTHR10642:SF0 (PANTHER); PTHR10642 (PANTHER); IPR002156 (PROSITE_PROFILES); cd09276 (CDD); IPR012337 (SUPERFAMILY)	uncharacterized protein LOC111106094	no GO terms	no GO terms
Cnem003683-RA	150	no hit	no hit	no hit	no hit	no hit	no hit	no hit	no GO terms	no GO terms	mobidb-lite (MOBIDB_LITE); TRANSMEMBRANE (PHOBIUS); CYTOPLASMIC_DOMAIN (PHOBIUS); NON_CYTOPLASMIC_DOMAIN (PHOBIUS)	---NA---	no GO terms	no GO terms
Cnem003686-RA	671	RUS88711.1	37.8	270.4	A0A433U4I6	37.8	270.4	K02910	P:GO:0006412; F:GO:0003676; F:GO:0003735; F:GO:0004523; C:GO:0005840	P:translation; F:nucleic acid binding; F:structural constituent of ribosome; F:RNA-DNA hybrid ribonuclease activity; C:ribosome	Coil (COILS); IPR000054 (SMART); IPR036397 (G3DSA:3.30.420.GENE3D); IPR000477 (PFAM); IPR000054 (PFAM); IPR023621 (G3DSA:3.10.440.GENE3D); IPR000054 (PANTHER); PTHR10956:SF32 (PANTHER); PTHR10956:SF32 (PANTHER); IPR000054 (PANTHER); IPR002156 (PROSITE_PROFILES); IPR012337 (SUPERFAMILY); IPR012337 (SUPERFAMILY); IPR023621 (SUPERFAMILY)	hypothetical protein EGW08_003526	P:GO:0090502; F:GO:0003676; F:GO:0004523	P:RNA phosphodiester bond hydrolysis, endonucleolytic; F:nucleic acid binding; F:RNA-DNA hybrid ribonuclease activity
Cnem003687-RA	311	RUS71160.1	53.3	117.9	A0A433SPH8	53.3	117.9	no hit	no GO terms	no GO terms	mobidb-lite (MOBIDB_LITE); mobidb-lite (MOBIDB_LITE); mobidb-lite (MOBIDB_LITE); mobidb-lite (MOBIDB_LITE); mobidb-lite (MOBIDB_LITE)	zinc finger CCCH domain-containing protein 18-like isoform X3	no GO terms	no GO terms
Cnem003694-RA	462	PIK62472.1	24.0	108.6	A0A2G8LQH5	24.0	108.6	no hit	no GO terms	no GO terms	IPR036691 (G3DSA:3.60.10.GENE3D); IPR000477 (PFAM); PTHR19446:SF401 (PANTHER); PTHR19446 (PANTHER); PTHR19446 (PANTHER); PTHR19446:SF401 (PANTHER); IPR036691 (SUPERFAMILY)	reverse transcriptase family protein	no GO terms	no GO terms
Cnem003695-RA	1199	RUS80216.1	44.6	506.1	A0A3S1C192	44.6	506.1	no hit	no GO terms	no GO terms	IPR036691 (G3DSA:3.60.10.GENE3D); IPR000477 (PFAM); PTHR19446 (PANTHER); PTHR19446:SF427 (PANTHER); PTHR19446:SF427 (PANTHER); IPR000477 (PROSITE_PROFILES); IPR000477 (PROSITE_PROFILES); cd01650 (CDD); cd01650 (CDD); IPR043502 (SUPERFAMILY); IPR036691 (SUPERFAMILY); IPR043502 (SUPERFAMILY)	hypothetical protein EGW08_012012	no GO terms	no GO terms
Cnem003697-RA	742	XP_012935106.1	42.6	548.5	A0A2C9JTA8	42.7	474.2	K10159	P:GO:0002224; P:GO:0006955; P:GO:0007165; F:GO:0004888; F:GO:0005515; C:GO:0016021	P:toll-like receptor signaling pathway; P:immune response; P:signal transduction; F:transmembrane signaling receptor activity; F:protein binding; C:integral component of membrane	IPR000157 (PFAM); IPR035897 (G3DSA:3.40.50.GENE3D); IPR032675 (G3DSA:3.80.10.GENE3D); mobidb-lite (MOBIDB_LITE); IPR017241 (PANTHER); PTHR24365:SF537 (PANTHER); IPR000157 (PROSITE_PROFILES); IPR035897 (SUPERFAMILY); SSF52058 (SUPERFAMILY)	PREDICTED: uncharacterized protein LOC101845154	no GO terms	no GO terms
Cnem003701-RA	134	XP_013096107.1	71.6	191.4	A0A2C9KCQ8	71.6	191.4	K19348	P:GO:0010826; P:GO:0060271; C:GO:0036038	P:negative regulation of centrosome duplication; P:cilium assembly; C:MKS complex	IPR019170 (PFAM); IPR019170 (PANTHER)	PREDICTED: meckelin-like	P:GO:0010826; P:GO:0060271; C:GO:0016021; C:GO:0036038	P:negative regulation of centrosome duplication; P:cilium assembly; C:integral component of membrane; C:MKS complex
Cnem003702-RA	303	PIK49422.1	27.0	71.6	A0A2G8KN41	27.0	71.6	no hit	no GO terms	no GO terms	mobidb-lite (MOBIDB_LITE); mobidb-lite (MOBIDB_LITE); mobidb-lite (MOBIDB_LITE); mobidb-lite (MOBIDB_LITE); PTHR47027 (PANTHER); PTHR47027:SF6 (PANTHER)	hypothetical protein EGW08_021432	no GO terms	no GO terms
Cnem003710-RA	133	XP_005099614.1	69.9	191.0	A0A2T7NI85	58.6	165.2	K23490	no GO terms	no GO terms	IPR001199 (PRINTS); IPR001199 (PFAM); IPR036400 (G3DSA:3.10.120.GENE3D); mobidb-lite (MOBIDB_LITE); PTHR19359:SF88 (PANTHER); PTHR19359 (PANTHER); IPR001199 (PROSITE_PROFILES); IPR036400 (SUPERFAMILY)	cytochrome b5-like	no GO terms	no GO terms
Cnem003713-RA	844	no hit	no hit	no hit	no hit	no hit	no hit	no hit	C:GO:0016021	C:integral component of membrane	IPR001614 (PRINTS); mobidb-lite (MOBIDB_LITE); mobidb-lite (MOBIDB_LITE); IPR017452 (PROSITE_PROFILES); IPR000175 (PROSITE_PROFILES); cd06174 (CDD)	DNA repair protein RAD50	no GO terms	no GO terms
Cnem003714-RA	257	XP_012940117.1	68.8	399.8	A0A2C9KZI8	64.1	369.8	no hit	no GO terms	no GO terms	IPR011735 (PFAM); PTHR21579:SF16 (PANTHER); PTHR21579 (PANTHER)	PREDICTED: uncharacterized protein LOC101863276 isoform X2	no GO terms	no GO terms
Cnem003715-RA	873	XP_014429993.1	44.8	294.3	A0A183LR54	40.5	260.4	K12884	F:GO:0003676	F:nucleic acid binding	IPR012677 (G3DSA:3.30.70.GENE3D); IPR000504 (PFAM); IPR000477 (PFAM); mobidb-lite (MOBIDB_LITE); mobidb-lite (MOBIDB_LITE); mobidb-lite (MOBIDB_LITE); mobidb-lite (MOBIDB_LITE); PTHR47027 (PANTHER); PTHR47027:SF5 (PANTHER); IPR000477 (PROSITE_PROFILES); IPR000504 (PROSITE_PROFILES); cd12341 (CDD); IPR035979 (SUPERFAMILY)	hypothetical protein EGW08_005938	no GO terms	no GO terms
Cnem003718-RA	256	XP_005102643.1	83.1	442.2	A0A3S1BC59	78.3	418.7	K11519	no GO terms	no GO terms	IPR007599 (PFAM); mobidb-lite (MOBIDB_LITE); mobidb-lite (MOBIDB_LITE); PTHR11009:SF1 (PANTHER); PTHR11009 (PANTHER); SSF144091 (SUPERFAMILY)	PREDICTED: derlin-1-like	no GO terms	no GO terms
Cnem003725-RA	241	XP_013065181.1	63.8	153.7	A0A2C9K770	63.8	153.7	no hit	C:GO:0016021	C:integral component of membrane	IPR000175 (PFAM); mobidb-lite (MOBIDB_LITE); mobidb-lite (MOBIDB_LITE); mobidb-lite (MOBIDB_LITE); mobidb-lite (MOBIDB_LITE); mobidb-lite (MOBIDB_LITE); IPR000175 (PANTHER); IPR000175 (PROSITE_PROFILES); IPR037272 (SUPERFAMILY)	sodium-dependent serotonin transporter-like	P:GO:0055085; F:GO:0015293; C:GO:0016021	P:transmembrane transport; F:symporter activity; C:integral component of membrane
Cnem003728-RA	794	RUS88711.1	43.6	485.0	A0A433U4I6	43.6	485.0	no hit	F:GO:0003676; F:GO:0004523	F:nucleic acid binding; F:RNA-DNA hybrid ribonuclease activity	IPR000477 (PFAM); IPR036397 (G3DSA:3.30.420.GENE3D); PTHR19446 (PANTHER); IPR002156 (PROSITE_PROFILES); IPR000477 (PROSITE_PROFILES); cd01650 (CDD); IPR043502 (SUPERFAMILY); IPR012337 (SUPERFAMILY)	hypothetical protein EGW08_003526	P:GO:0090502; F:GO:0003676; F:GO:0004523	P:RNA phosphodiester bond hydrolysis, endonucleolytic; F:nucleic acid binding; F:RNA-DNA hybrid ribonuclease activity
Cnem003731-RA	79	CAB3263295.1	53.8	82.0	A0A3S1A2L0	47.5	75.9	no hit	no GO terms	no GO terms	PTHR47027 (PANTHER); PTHR47027:SF6 (PANTHER)	hypothetical protein EGW08_002896	F:GO:0005524; C:GO:0016021	F:ATP binding; C:integral component of membrane
Cnem003737-RA	109	RUS90919.1	51.6	70.5	A0A3S1A548	51.6	70.5	no hit	no GO terms	no GO terms	mobidb-lite (MOBIDB_LITE)	hypothetical protein EGW08_001316	no GO terms	no GO terms
Cnem003746-RA	263	XP_013084896.1	82.0	302.0	A0A2C9JIN8	82.0	302.0	no hit	no IPS match	no IPS match	no IPS match	kinesin-like protein KIF15	P:GO:0007018; F:GO:0003777; F:GO:0005524; F:GO:0008017	P:microtubule-based movement; F:microtubule motor activity; F:ATP binding; F:microtubule binding
Cnem003747-RA	1282	RUS85319.1	48.5	1205.7	A0A3S1BCT8	48.5	1205.7	no hit	F:GO:0003676; F:GO:0004523	F:nucleic acid binding; F:RNA-DNA hybrid ribonuclease activity	IPR002156 (PFAM); IPR005135 (PFAM); IPR000477 (PFAM); IPR036397 (G3DSA:3.30.420.GENE3D); IPR036691 (G3DSA:3.60.10.GENE3D); PTHR19446:SF427 (PANTHER); PTHR19446 (PANTHER); IPR000477 (PROSITE_PROFILES); IPR002156 (PROSITE_PROFILES); cd01650 (CDD); cd09276 (CDD); IPR012337 (SUPERFAMILY); IPR043502 (SUPERFAMILY); IPR036691 (SUPERFAMILY)	hypothetical protein EGW08_006920	P:GO:0090502; F:GO:0003676; F:GO:0004523	P:RNA phosphodiester bond hydrolysis, endonucleolytic; F:nucleic acid binding; F:RNA-DNA hybrid ribonuclease activity
Cnem003748-RA	242	XP_013087879.1	78.8	369.4	A0A2C9JXL9	78.8	369.4	K13781	P:GO:0055085; F:GO:0022857; C:GO:0016020	P:transmembrane transport; F:transmembrane transporter activity; C:membrane	G3DSA:1.20.1740.10 (GENE3D); IPR002293 (PFAM); PTHR11785:SF389 (PANTHER); PTHR11785 (PANTHER)	large neutral amino acids transporter small subunit 2-like	P:GO:0055085; F:GO:0022857; C:GO:0016021	P:transmembrane transport; F:transmembrane transporter activity; C:integral component of membrane
Cnem003752-RA	126	RUS70812.1	49.2	66.2	A0A433SNT6	49.2	66.2	no hit	no IPS match	no IPS match	no IPS match	hypothetical protein AC249_AIPGENE15317	no GO terms	no GO terms
Cnem003767-RA	285	PVD21563.1	38.7	161.8	A0A2T7NK70	38.7	161.8	no hit	no GO terms	no GO terms	PTHR19446:SF421 (PANTHER); PTHR19446 (PANTHER)	hypothetical protein C0Q70_17361	no GO terms	no GO terms
Cnem003781-RA	215	GCA32160.1	50.0	69.7	A0A3Q1LW94	45.2	70.9	no hit	no IPS match	no IPS match	no IPS match	uncharacterized protein LOC115929290	no GO terms	no GO terms
Cnem003786-RA	217	XP_025088487.1	49.5	91.3	A0A2T7PZR5	49.5	91.3	no hit	P:GO:0007186; F:GO:0004930; C:GO:0016021	P:G protein-coupled receptor signaling pathway; F:G protein-coupled receptor activity; C:integral component of membrane	IPR000276 (PRINTS); G3DSA:1.20.1070.10 (GENE3D); IPR017452 (PFAM); PTHR45695:SF5 (PANTHER); PTHR45695 (PANTHER); IPR017452 (PROSITE_PROFILES); cd00637 (CDD); SSF81321 (SUPERFAMILY)	neuropeptide FF receptor 2-like	no GO terms	no GO terms
Cnem003790-RA	245	no hit	no hit	no hit	no hit	no hit	no hit	no hit	no GO terms	no GO terms	IPR036514 (G3DSA:3.40.50.GENE3D); mobidb-lite (MOBIDB_LITE); mobidb-lite (MOBIDB_LITE); mobidb-lite (MOBIDB_LITE); SSF52266 (SUPERFAMILY)	---NA---	no GO terms	no GO terms
Cnem003799-RA	901	XP_012936349.1	31.5	294.7	A0A0L8FS79	38.1	123.6	no hit	P:GO:0016043; F:GO:0003779	P:cellular component organization; F:actin binding	IPR011989 (G3DSA:1.25.10.GENE3D); IPR010472 (PFAM); mobidb-lite (MOBIDB_LITE); mobidb-lite (MOBIDB_LITE); mobidb-lite (MOBIDB_LITE); mobidb-lite (MOBIDB_LITE); mobidb-lite (MOBIDB_LITE); mobidb-lite (MOBIDB_LITE); mobidb-lite (MOBIDB_LITE); mobidb-lite (MOBIDB_LITE); mobidb-lite (MOBIDB_LITE); mobidb-lite (MOBIDB_LITE); mobidb-lite (MOBIDB_LITE); mobidb-lite (MOBIDB_LITE); PTHR45857 (PANTHER); PT…	formin-like protein 1	no GO terms	no GO terms
Cnem003803-RA	180	BAV14504.1	67.4	269.6	A0A2T7PVU1	57.1	219.2	no hit	P:GO:0005975	P:carbohydrate metabolic process	IPR029070 (G3DSA:3.10.50.GENE3D); G3DSA:3.20.20.80 (GENE3D); IPR001223 (PFAM); PTHR11177:SF248 (PANTHER); PTHR11177 (PANTHER); IPR017853 (SUPERFAMILY); IPR029070 (SUPERFAMILY)	chitinase	no GO terms	no GO terms
Cnem003805-RA	450	BAV14504.1	52.5	275.0	A0A1S3IXN4	45.8	232.6	K01183	P:GO:0005975	P:carbohydrate metabolic process	IPR001223 (PFAM); G3DSA:3.20.20.80 (GENE3D); mobidb-lite (MOBIDB_LITE); mobidb-lite (MOBIDB_LITE); mobidb-lite (MOBIDB_LITE); mobidb-lite (MOBIDB_LITE); PTHR11177:SF248 (PANTHER); PTHR11177 (PANTHER); IPR017853 (SUPERFAMILY)	chitinase	no GO terms	no GO terms
Cnem003807-RA	252	XP_012943779.1	47.7	133.7	A0A3S1BCT8	36.7	59.7	no hit	no GO terms	no GO terms	IPR000477 (PFAM)	PREDICTED: uncharacterized protein LOC106013216	no GO terms	no GO terms
Cnem003815-RA	67	no hit	no hit	no hit	no hit	no hit	no hit	no hit	no GO terms	no GO terms	mobidb-lite (MOBIDB_LITE)	---NA---	no GO terms	no GO terms
Cnem003816-RA	1416	WP_144078600.1	42.8	906.4	W4XIZ7	30.1	496.5	K07497	P:GO:0015074; F:GO:0003676	P:DNA integration; F:nucleic acid binding	PF13975 (PFAM); G3DSA:3.10.10.10 (GENE3D); IPR000477 (PFAM); G3DSA:3.10.20.370 (GENE3D); IPR043128 (G3DSA:3.30.70.GENE3D); IPR041588 (PFAM); IPR043128 (G3DSA:3.30.70.GENE3D); IPR021109 (G3DSA:2.40.70.GENE3D); G3DSA:1.10.340.70 (GENE3D); IPR001584 (PFAM); IPR041373 (PFAM); IPR036397 (G3DSA:3.30.420.GENE3D); mobidb-lite (MOBIDB_LITE); mobidb-lite (MOBIDB_LITE); PTHR24559 (PANTHER); PTHR24559:SF269 …	DDE-type integrase/transposase/recombinase	no GO terms	no GO terms
Cnem003819-RA	1101	WP_144078600.1	38.8	591.7	A0A087T3I4	26.6	367.5	no hit	P:GO:0006508; F:GO:0004190	P:proteolysis; F:aspartic-type endopeptidase activity	IPR043128 (G3DSA:3.30.70.GENE3D); IPR041373 (PFAM); G3DSA:3.10.20.370 (GENE3D); IPR000477 (PFAM); IPR021109 (G3DSA:2.40.70.GENE3D); IPR041588 (PFAM); G3DSA:3.10.10.10 (GENE3D); G3DSA:1.10.340.70 (GENE3D); IPR018061 (PFAM); IPR043128 (G3DSA:3.30.70.GENE3D); PTHR24559 (PANTHER); PTHR24559:SF269 (PANTHER); PTHR24559:SF269 (PANTHER); IPR001995 (PROSITE_PROFILES); IPR000477 (PROSITE_PROFILES); cd01647…	DDE-type integrase/transposase/recombinase	no GO terms	no GO terms
Cnem003821-RA	384	RUS84200.1	39.3	246.9	A0A3S0ZQ40	39.3	246.9	no hit	F:GO:0003676; F:GO:0004523	F:nucleic acid binding; F:RNA-DNA hybrid ribonuclease activity	IPR002156 (PFAM); IPR036397 (G3DSA:3.30.420.GENE3D); PTHR10642:SF0 (PANTHER); PTHR10642 (PANTHER); IPR002156 (PROSITE_PROFILES); cd09276 (CDD); IPR012337 (SUPERFAMILY)	hypothetical protein EGW08_008040	P:GO:0090502; F:GO:0003676; F:GO:0004523	P:RNA phosphodiester bond hydrolysis, endonucleolytic; F:nucleic acid binding; F:RNA-DNA hybrid ribonuclease activity
Cnem003822-RA	164	XP_012935086.1	76.7	254.6	A0A3S1BUD8	75.2	254.2	no hit	no GO terms	no GO terms	IPR039269 (PANTHER); PTHR21437:SF3 (PANTHER)	hypothetical protein EGW08_003291, partial	no GO terms	no GO terms
Cnem003823-RA	363	XP_012935086.1	56.4	323.9	A0A2C9LKH5	53.1	317.0	no hit	no GO terms	no GO terms	mobidb-lite (MOBIDB_LITE); IPR039269 (PANTHER); cd17117 (CDD)	PREDICTED: uncharacterized protein LOC106051813	no GO terms	no GO terms
Cnem003829-RA	228	XP_005089248.1	77.7	151.0	A0A3S0ZY76	75.5	146.7	K16535	P:GO:0034453; C:GO:0005815	P:microtubule anchoring; C:microtubule organizing center	G3DSA:1.20.960.40 (GENE3D); IPR018993 (PFAM); PTHR15431 (PANTHER)	lisH domain-containing protein FOPNL-like	no GO terms	no GO terms
Cnem003832-RA	178	no hit	no hit	no hit	no hit	no hit	no hit	no hit	no IPS match	no IPS match	no IPS match	---NA---	no GO terms	no GO terms
Cnem003833-RA	240	XP_005089247.1	65.7	308.9	V3ZXS3	50.4	251.9	K15118	no GO terms	no GO terms	IPR018108 (PFAM); IPR023395 (G3DSA:1.50.40.GENE3D); PTHR46181 (PANTHER); IPR018108 (PROSITE_PROFILES); IPR018108 (PROSITE_PROFILES); IPR023395 (SUPERFAMILY)	solute carrier family 25 member 38-A-like isoform X2	no GO terms	no GO terms
Cnem003835-RA	68	no hit	no hit	no hit	no hit	no hit	no hit	no hit	no IPS match	no IPS match	no IPS match	---NA---	no GO terms	no GO terms
Cnem003839-RA	390	RUS88711.1	46.7	164.1	A0A433U4I6	46.7	164.1	no hit	F:GO:0003676; F:GO:0004523	F:nucleic acid binding; F:RNA-DNA hybrid ribonuclease activity	IPR036397 (G3DSA:3.30.420.GENE3D); IPR002156 (PFAM); mobidb-lite (MOBIDB_LITE); IPR002156 (PROSITE_PROFILES); IPR012337 (SUPERFAMILY)	hypothetical protein EGW08_008040	P:GO:0090502; F:GO:0003676; F:GO:0004523	P:RNA phosphodiester bond hydrolysis, endonucleolytic; F:nucleic acid binding; F:RNA-DNA hybrid ribonuclease activity
Cnem003840-RA	1038	XP_013064065.1	56.3	337.0	A0A2C9JFM7	56.3	337.0	K10581	F:GO:0003676; F:GO:0004523	F:nucleic acid binding; F:RNA-DNA hybrid ribonuclease activity	IPR000477 (PFAM); IPR036397 (G3DSA:3.30.420.GENE3D); IPR002156 (PFAM); mobidb-lite (MOBIDB_LITE); mobidb-lite (MOBIDB_LITE); PTHR46116 (PANTHER); PTHR46116:SF5 (PANTHER); IPR002156 (PROSITE_PROFILES); IPR000477 (PROSITE_PROFILES); cd09276 (CDD); IPR012337 (SUPERFAMILY)	hypothetical protein EGW08_003526	P:GO:0090502; F:GO:0003676; F:GO:0004523	P:RNA phosphodiester bond hydrolysis, endonucleolytic; F:nucleic acid binding; F:RNA-DNA hybrid ribonuclease activity
Cnem003844-RA	264	RUS80216.1	43.6	69.7	A0A3S1C192	43.6	69.7	no hit	F:GO:0003676; F:GO:0004523	F:nucleic acid binding; F:RNA-DNA hybrid ribonuclease activity	Coil (COILS); IPR002156 (PFAM); IPR036397 (G3DSA:3.30.420.GENE3D); IPR012337 (SUPERFAMILY)	hypothetical protein EGW08_008040	P:GO:0090502; F:GO:0003676; F:GO:0004523	P:RNA phosphodiester bond hydrolysis, endonucleolytic; F:nucleic acid binding; F:RNA-DNA hybrid ribonuclease activity
Cnem003845-RA	140	XP_013095978.1	84.2	215.7	A0A2C9LN23	84.2	215.7	no hit	P:GO:0006355; F:GO:0003700; F:GO:0043565	P:regulation of transcription, DNA-templated; F:DNA-binding transcription factor activity; F:sequence-specific DNA binding	IPR000418 (SMART); IPR036388 (G3DSA:1.10.10.GENE3D); IPR000418 (PFAM); PTHR11849:SF274 (PANTHER); PTHR11849 (PANTHER); IPR000418 (PROSITE_PROFILES); IPR036390 (SUPERFAMILY)	transcriptional regulator ERG homolog isoform X2	no GO terms	no GO terms
Cnem003846-RA	833	PVD21563.1	38.1	319.7	A0A2T7NK70	38.1	319.7	no hit	no GO terms	no GO terms	IPR036514 (G3DSA:3.40.50.GENE3D); IPR000477 (PFAM); mobidb-lite (MOBIDB_LITE); PTHR19446:SF425 (PANTHER); PTHR19446 (PANTHER); IPR000477 (PROSITE_PROFILES); cd00229 (CDD); cd01650 (CDD); IPR043502 (SUPERFAMILY); SSF52266 (SUPERFAMILY)	hypothetical protein C0Q70_17361	no GO terms	no GO terms
Cnem003849-RA	803	XP_019622270.1	56.2	926.0	K7EZE2	51.2	871.3	no hit	no GO terms	no GO terms	Coil (COILS); IPR000477 (PFAM); IPR036691 (G3DSA:3.60.10.GENE3D); PTHR19446 (PANTHER); PTHR19446:SF411 (PANTHER); CYTOPLASMIC_DOMAIN (PHOBIUS); NON_CYTOPLASMIC_DOMAIN (PHOBIUS); TRANSMEMBRANE (PHOBIUS); IPR000477 (PROSITE_PROFILES); cd01650 (CDD); IPR043502 (SUPERFAMILY); IPR036691 (SUPERFAMILY)	PREDICTED: uncharacterized protein LOC109468467	no GO terms	no GO terms
Cnem003850-RA	479	XP_005102860.1;XP_012940535.1;XP_012940536.1	53.4	428.3	A0A2C9JT99	50.9	408.7	no hit	no GO terms	no GO terms	IPR024131 (PFAM); IPR024131 (PANTHER)	UPF0489 protein C5orf22 homolog	no GO terms	no GO terms
Cnem003853-RA	592	RUS88711.1	47.1	205.3	A0A433U4I6	47.1	205.3	no hit	P:GO:0051225; F:GO:0003676; F:GO:0004523; C:GO:0070652	P:spindle assembly; F:nucleic acid binding; F:RNA-DNA hybrid ribonuclease activity; C:HAUS complex	IPR029327 (PFAM); IPR036397 (G3DSA:3.30.420.GENE3D); IPR000477 (PFAM); IPR002156 (PFAM); PTHR19446 (PANTHER); PTHR19446:SF411 (PANTHER); PTHR19446:SF411 (PANTHER); PTHR19446 (PANTHER); IPR000477 (PROSITE_PROFILES); IPR002156 (PROSITE_PROFILES); cd09276 (CDD); IPR012337 (SUPERFAMILY)	hypothetical protein EGW08_003526	P:GO:0090502; F:GO:0003676; F:GO:0004523	P:RNA phosphodiester bond hydrolysis, endonucleolytic; F:nucleic acid binding; F:RNA-DNA hybrid ribonuclease activity
Cnem003859-RA	446	XP_013077244.1	87.0	615.1	A0A2C9JQ75	87.1	606.3	K12196	F:GO:0005524	F:ATP binding	Coil (COILS); IPR007330 (SMART); IPR003593 (SMART); G3DSA:3.40.50.300 (GENE3D); G3DSA:1.20.58.280 (GENE3D); IPR003959 (PFAM); IPR007330 (PFAM); G3DSA:1.10.8.60 (GENE3D); IPR015415 (PFAM); IPR041569 (PFAM); mobidb-lite (MOBIDB_LITE); mobidb-lite (MOBIDB_LITE); PTHR23074:SF83 (PANTHER); PTHR23074 (PANTHER); IPR003960 (PROSITE_PATTERNS); cd00009 (CDD); cd02678 (CDD); IPR027417 (SUPERFAMILY); IPR0361…	vacuolar protein sorting-associated protein 4B-like	no GO terms	no GO terms
Cnem003861-RA	191	XP_013074755.1	100.0	389.8	A0A2C9JNH4	100.0	389.8	no hit	no GO terms	no GO terms	IPR007714 (PFAM); PTHR12458:SF8 (PANTHER); IPR040441 (PANTHER)	cilia- and flagella-associated protein 20	no GO terms	no GO terms
Cnem003868-RA	287	XP_014677047.1	44.8	188.7	A0A3P8TFH9	50.2	207.6	no hit	no GO terms	no GO terms	IPR000477 (PFAM); PTHR19446 (PANTHER); PTHR19446:SF427 (PANTHER); IPR043502 (SUPERFAMILY)	pol-like protein	no GO terms	no GO terms
Cnem003881-RA	768	RUS80216.1	38.4	258.5	A0A3S1C192	38.4	258.5	no hit	F:GO:0003676; F:GO:0004523	F:nucleic acid binding; F:RNA-DNA hybrid ribonuclease activity	IPR036397 (G3DSA:3.30.420.GENE3D); IPR000477 (PFAM); IPR002156 (PFAM); PTHR19446 (PANTHER); PTHR19446:SF427 (PANTHER); IPR002156 (PROSITE_PROFILES); IPR043502 (SUPERFAMILY); IPR012337 (SUPERFAMILY)	hypothetical protein EGW08_012012	no GO terms	no GO terms
Cnem003884-RA	289	XP_013083546.1	53.4	242.3	A0A2C9JIQ4	53.4	242.3	K04967	P:GO:0070588; F:GO:0005262; F:GO:0005515; C:GO:0016020	P:calcium ion transmembrane transport; F:calcium channel activity; F:protein binding; C:membrane	IPR013555 (PFAM); mobidb-lite (MOBIDB_LITE); mobidb-lite (MOBIDB_LITE); IPR002153 (PANTHER); IPR002110 (PROSITE_PROFILES); IPR020683 (PROSITE_PROFILES); IPR016024 (SUPERFAMILY)	short transient receptor potential channel 6-like	P:GO:0070588; F:GO:0005262; C:GO:0016021	P:calcium ion transmembrane transport; F:calcium channel activity; C:integral component of membrane
Cnem003888-RA	887	RUS88277.1	88.3	214.9	A0A3S1BP78	88.3	214.9	K04970	P:GO:0070588; F:GO:0003676; F:GO:0004523; F:GO:0005262; C:GO:0016020	P:calcium ion transmembrane transport; F:nucleic acid binding; F:RNA-DNA hybrid ribonuclease activity; F:calcium channel activity; C:membrane	IPR002153 (PRINTS); IPR036397 (G3DSA:3.30.420.GENE3D); IPR000477 (PFAM); IPR002156 (PFAM); mobidb-lite (MOBIDB_LITE); IPR002153 (PANTHER); CYTOPLASMIC_DOMAIN (PHOBIUS); NON_CYTOPLASMIC_DOMAIN (PHOBIUS); CYTOPLASMIC_DOMAIN (PHOBIUS); TRANSMEMBRANE (PHOBIUS); NON_CYTOPLASMIC_DOMAIN (PHOBIUS); TRANSMEMBRANE (PHOBIUS); TRANSMEMBRANE (PHOBIUS); IPR000477 (PROSITE_PROFILES); IPR002156 (PROSITE_PROFILES…	hypothetical protein EGW08_003526	P:GO:0090502; F:GO:0003676; F:GO:0004523	P:RNA phosphodiester bond hydrolysis, endonucleolytic; F:nucleic acid binding; F:RNA-DNA hybrid ribonuclease activity
Cnem003896-RA	1492	PCG69477.1	36.2	604.0	A0A2A4JBK9	36.2	604.0	K03038	F:GO:0003676; F:GO:0004523; F:GO:0005515	F:nucleic acid binding; F:RNA-DNA hybrid ribonuclease activity; F:protein binding	Coil (COILS); IPR000555 (SMART); G3DSA:3.40.140.10 (GENE3D); IPR000555 (PFAM); IPR005135 (PFAM); IPR002156 (PFAM); IPR036397 (G3DSA:3.30.420.GENE3D); IPR036691 (G3DSA:3.60.10.GENE3D); IPR000477 (PFAM); PTHR19446:SF427 (PANTHER); PTHR19446 (PANTHER); IPR002156 (PROSITE_PROFILES); IPR000477 (PROSITE_PROFILES); cd09076 (CDD); cd01650 (CDD); cd09276 (CDD); IPR043502 (SUPERFAMILY); IPR012337 (SUPERFAM…	unnamed protein product	no GO terms	no GO terms
Cnem003903-RA	236	XP_005101567.2	56.7	173.7	A0A3S1BM60	77.3	157.5	K20210	no GO terms	no GO terms	IPR013087 (SMART); G3DSA:3.30.160.60 (GENE3D); IPR013087 (PFAM); G3DSA:3.30.160.60 (GENE3D); mobidb-lite (MOBIDB_LITE); PTHR46451 (PANTHER); IPR013087 (PROSITE_PATTERNS); IPR013087 (PROSITE_PATTERNS); IPR013087 (PROSITE_PATTERNS); IPR013087 (PROSITE_PROFILES); IPR013087 (PROSITE_PROFILES); IPR036236 (SUPERFAMILY); IPR012337 (SUPERFAMILY)	PREDICTED: uncharacterized protein LOC101861292	no GO terms	no GO terms
Cnem003905-RA	917	KAF0290124.1	29.5	240.4	C3ZYD8	28.8	98.6	no hit	F:GO:0003676; F:GO:0004523	F:nucleic acid binding; F:RNA-DNA hybrid ribonuclease activity	IPR036691 (G3DSA:3.60.10.GENE3D); IPR000477 (PFAM); IPR002156 (PFAM); IPR036397 (G3DSA:3.30.420.GENE3D); PTHR33332:SF6 (PANTHER); PTHR33332 (PANTHER); NON_CYTOPLASMIC_DOMAIN (PHOBIUS); CYTOPLASMIC_DOMAIN (PHOBIUS); TRANSMEMBRANE (PHOBIUS); IPR000477 (PROSITE_PROFILES); IPR002156 (PROSITE_PROFILES); cd09276 (CDD); IPR043502 (SUPERFAMILY); IPR012337 (SUPERFAMILY); IPR036691 (SUPERFAMILY)	hypothetical protein EGW08_003526	P:GO:0090502; F:GO:0003676; F:GO:0004523	P:RNA phosphodiester bond hydrolysis, endonucleolytic; F:nucleic acid binding; F:RNA-DNA hybrid ribonuclease activity
Cnem003909-RA	673	PVD21563.1	40.7	247.3	A0A2T7NK70	40.7	247.3	no hit	no GO terms	no GO terms	Coil (COILS); IPR000477 (PFAM); PTHR19446 (PANTHER); PTHR19446:SF425 (PANTHER); IPR043502 (SUPERFAMILY)	hypothetical protein C0Q70_17361	no GO terms	no GO terms
Cnem003913-RA	253	RUS81786.1	40.2	82.4	A0A433TJU2	40.2	82.4	no hit	F:GO:0003676; F:GO:0004523	F:nucleic acid binding; F:RNA-DNA hybrid ribonuclease activity	IPR036397 (G3DSA:3.30.420.GENE3D); IPR002156 (PFAM); IPR002156 (PROSITE_PROFILES); cd09276 (CDD); IPR012337 (SUPERFAMILY)	ribonuclease H1-like	no GO terms	no GO terms
[truncated: 42,539 more rows]
